# Supplementary material
Source: publisher figshare collection journal article supplement (https://acs.figshare.com/ndownloader/files/9151108)
Supplement: Supplementary file 1 [file 9151108]

data_5V2X
# 
_entry.id   5V2X 
# 
_audit_conform.dict_name       mmcif_pdbx.dic 
_audit_conform.dict_version    4.070 
_audit_conform.dict_location   http://mmcif.pdb.org/dictionaries/ascii/mmcif_pdbx.dic 
# 
loop_
_database_2.database_id 
_database_2.database_code 
PDB   5V2X         
WWPDB D_1000226806 
# 
_database_PDB_rev.num             . 
_database_PDB_rev.date            ? 
_database_PDB_rev.date_original   2017-03-06 
_database_PDB_rev.status          ? 
_database_PDB_rev.replaces        ? 
_database_PDB_rev.mod_type        ? 
# 
loop_
_pdbx_database_related.db_id 
_pdbx_database_related.db_name 
_pdbx_database_related.content_type 
_pdbx_database_related.details 
5V2T PDB unspecified . 
5V2U PDB unspecified . 
5V2V PDB unspecified . 
5V2Y PDB unspecified . 
5V2Z PDB unspecified . 
5V31 PDB unspecified . 
5V32 PDB unspecified . 
5V34 PDB unspecified . 
# 
_pdbx_database_status.status_code                      AUTH 
_pdbx_database_status.status_code_sf                   AUTH 
_pdbx_database_status.status_code_mr                   ? 
_pdbx_database_status.entry_id                         5V2X 
_pdbx_database_status.date_begin_release_preparation   ? 
_pdbx_database_status.SG_entry                         N 
_pdbx_database_status.deposit_site                     RCSB 
_pdbx_database_status.process_site                     RCSB 
_pdbx_database_status.methods_development_category     ? 
_pdbx_database_status.pdb_format_compatible            Y 
# 
loop_
_audit_author.name 
_audit_author.pdbx_ordinal 
_audit_author.identifier_ORCID 
'Fellner, M.'     1 ? 
'Martinez, S.'    2 ? 
'Hu, J.'          3 ? 
'Hausinger, R.P.' 4 ? 
# 
_citation.abstract                  ? 
_citation.abstract_id_CAS           ? 
_citation.book_id_ISBN              ? 
_citation.book_publisher            ? 
_citation.book_publisher_city       ? 
_citation.book_title                ? 
_citation.coordinate_linkage        ? 
_citation.country                   ? 
_citation.database_id_Medline       ? 
_citation.details                   ? 
_citation.id                        primary 
_citation.journal_abbrev            'to be published' 
_citation.journal_id_ASTM           ? 
_citation.journal_id_CSD            0353 
_citation.journal_id_ISSN           ? 
_citation.journal_full              ? 
_citation.journal_issue             ? 
_citation.journal_volume            ? 
_citation.language                  ? 
_citation.page_first                ? 
_citation.page_last                 ? 
_citation.title                     'N-terminal fusion to SH' 
_citation.year                      ? 
_citation.database_id_CSD           ? 
_citation.pdbx_database_id_DOI      ? 
_citation.pdbx_database_id_PubMed   ? 
_citation.unpublished_flag          ? 
# 
loop_
_citation_author.citation_id 
_citation_author.name 
_citation_author.ordinal 
primary 'Fellner, M.'     1 
primary 'Martinez, S.'    2 
primary 'Hu, J.'          3 
primary 'Hausinger, R.P.' 4 
# 
_cell.angle_alpha                  90.000 
_cell.angle_alpha_esd              ? 
_cell.angle_beta                   90.000 
_cell.angle_beta_esd               ? 
_cell.angle_gamma                  90.000 
_cell.angle_gamma_esd              ? 
_cell.entry_id                     5V2X 
_cell.details                      ? 
_cell.formula_units_Z              ? 
_cell.length_a                     74.411 
_cell.length_a_esd                 ? 
_cell.length_b                     97.546 
_cell.length_b_esd                 ? 
_cell.length_c                     102.385 
_cell.length_c_esd                 ? 
_cell.volume                       ? 
_cell.volume_esd                   ? 
_cell.Z_PDB                        8 
_cell.reciprocal_angle_alpha       ? 
_cell.reciprocal_angle_beta        ? 
_cell.reciprocal_angle_gamma       ? 
_cell.reciprocal_angle_alpha_esd   ? 
_cell.reciprocal_angle_beta_esd    ? 
_cell.reciprocal_angle_gamma_esd   ? 
_cell.reciprocal_length_a          ? 
_cell.reciprocal_length_b          ? 
_cell.reciprocal_length_c          ? 
_cell.reciprocal_length_a_esd      ? 
_cell.reciprocal_length_b_esd      ? 
_cell.reciprocal_length_c_esd      ? 
_cell.pdbx_unique_axis             ? 
# 
_symmetry.entry_id                         5V2X 
_symmetry.cell_setting                     ? 
_symmetry.Int_Tables_number                19 
_symmetry.space_group_name_Hall            ? 
_symmetry.space_group_name_H-M             'P 21 21 21' 
_symmetry.pdbx_full_space_group_name_H-M   ? 
# 
loop_
_entity.id 
_entity.type 
_entity.src_method 
_entity.pdbx_description 
_entity.formula_weight 
_entity.pdbx_number_of_molecules 
_entity.pdbx_ec 
_entity.pdbx_mutation 
_entity.pdbx_fragment 
_entity.details 
1 polymer     man '2-oxoglutarate-dependent ethylene/succinate-forming enzyme' 39716.762 2   1.13.12.19,1.14.11.34 'to SH' ? ? 
2 non-polymer syn 'MANGANESE (II) ION'                                         54.938    2   ?                     ?       ? ? 
3 non-polymer syn '2-OXOGLUTARIC ACID'                                         146.098   4   ?                     ?       ? ? 
4 water       nat water                                                        18.015    994 ?                     ?       ? ? 
# 
_entity_name_com.entity_id   1 
_entity_name_com.name        
;Ethylene-forming enzyme,2-oxoglutarate dioxygenase (ethylene-forming),2-oxoglutarate/L-arginine monooxygenase/decarboxylase (succinate-forming)
;
# 
_entity_poly.entity_id                      1 
_entity_poly.type                           'polypeptide(L)' 
_entity_poly.nstd_linkage                   no 
_entity_poly.nstd_monomer                   no 
_entity_poly.pdbx_seq_one_letter_code       
;SHMTNLQTFELPTEVTGCAADISLGRALIQAWQKDGIFQIKTDSEQDRKTQEAMAASKQFCKEPLTFKSSCVSDLTYSGY
VASGEEVTAGKPDFPEIFTVCKDLSVGDQRVKAGWPCHGPVPWPNNTYQKSMKTFMEELGLAGERLLKLTALGFELPINT
FTDLTRDGWHHMRVLRFPPQTSTLSRGIGAHTDYGLLVIAAQDDVGGLYIRPPVEGEKRNRNWLPGESSAGMFEHDEPWT
FVTPTPGVWTVFPGDILQFMTGGQLLSTPHKVKLNTRERFACAYFHEPNFEASAYPLFEPSANERIHYGEHFTNMFMRCY
PDRITTQRINKENRLAHLEDLKKYSDTRATGS
;
_entity_poly.pdbx_seq_one_letter_code_can   
;SHMTNLQTFELPTEVTGCAADISLGRALIQAWQKDGIFQIKTDSEQDRKTQEAMAASKQFCKEPLTFKSSCVSDLTYSGY
VASGEEVTAGKPDFPEIFTVCKDLSVGDQRVKAGWPCHGPVPWPNNTYQKSMKTFMEELGLAGERLLKLTALGFELPINT
FTDLTRDGWHHMRVLRFPPQTSTLSRGIGAHTDYGLLVIAAQDDVGGLYIRPPVEGEKRNRNWLPGESSAGMFEHDEPWT
FVTPTPGVWTVFPGDILQFMTGGQLLSTPHKVKLNTRERFACAYFHEPNFEASAYPLFEPSANERIHYGEHFTNMFMRCY
PDRITTQRINKENRLAHLEDLKKYSDTRATGS
;
_entity_poly.pdbx_strand_id                 A,B 
_entity_poly.pdbx_target_identifier         ? 
# 
loop_
_entity_poly_seq.entity_id 
_entity_poly_seq.num 
_entity_poly_seq.mon_id 
_entity_poly_seq.hetero 
1 1   SER n 
1 2   HIS n 
1 3   MET n 
1 4   THR n 
1 5   ASN n 
1 6   LEU n 
1 7   GLN n 
1 8   THR n 
1 9   PHE n 
1 10  GLU n 
1 11  LEU n 
1 12  PRO n 
1 13  THR n 
1 14  GLU n 
1 15  VAL n 
1 16  THR n 
1 17  GLY n 
1 18  CYS n 
1 19  ALA n 
1 20  ALA n 
1 21  ASP n 
1 22  ILE n 
1 23  SER n 
1 24  LEU n 
1 25  GLY n 
1 26  ARG n 
1 27  ALA n 
1 28  LEU n 
1 29  ILE n 
1 30  GLN n 
1 31  ALA n 
1 32  TRP n 
1 33  GLN n 
1 34  LYS n 
1 35  ASP n 
1 36  GLY n 
1 37  ILE n 
1 38  PHE n 
1 39  GLN n 
1 40  ILE n 
1 41  LYS n 
1 42  THR n 
1 43  ASP n 
1 44  SER n 
1 45  GLU n 
1 46  GLN n 
1 47  ASP n 
1 48  ARG n 
1 49  LYS n 
1 50  THR n 
1 51  GLN n 
1 52  GLU n 
1 53  ALA n 
1 54  MET n 
1 55  ALA n 
1 56  ALA n 
1 57  SER n 
1 58  LYS n 
1 59  GLN n 
1 60  PHE n 
1 61  CYS n 
1 62  LYS n 
1 63  GLU n 
1 64  PRO n 
1 65  LEU n 
1 66  THR n 
1 67  PHE n 
1 68  LYS n 
1 69  SER n 
1 70  SER n 
1 71  CYS n 
1 72  VAL n 
1 73  SER n 
1 74  ASP n 
1 75  LEU n 
1 76  THR n 
1 77  TYR n 
1 78  SER n 
1 79  GLY n 
1 80  TYR n 
1 81  VAL n 
1 82  ALA n 
1 83  SER n 
1 84  GLY n 
1 85  GLU n 
1 86  GLU n 
1 87  VAL n 
1 88  THR n 
1 89  ALA n 
1 90  GLY n 
1 91  LYS n 
1 92  PRO n 
1 93  ASP n 
1 94  PHE n 
1 95  PRO n 
1 96  GLU n 
1 97  ILE n 
1 98  PHE n 
1 99  THR n 
1 100 VAL n 
1 101 CYS n 
1 102 LYS n 
1 103 ASP n 
1 104 LEU n 
1 105 SER n 
1 106 VAL n 
1 107 GLY n 
1 108 ASP n 
1 109 GLN n 
1 110 ARG n 
1 111 VAL n 
1 112 LYS n 
1 113 ALA n 
1 114 GLY n 
1 115 TRP n 
1 116 PRO n 
1 117 CYS n 
1 118 HIS n 
1 119 GLY n 
1 120 PRO n 
1 121 VAL n 
1 122 PRO n 
1 123 TRP n 
1 124 PRO n 
1 125 ASN n 
1 126 ASN n 
1 127 THR n 
1 128 TYR n 
1 129 GLN n 
1 130 LYS n 
1 131 SER n 
1 132 MET n 
1 133 LYS n 
1 134 THR n 
1 135 PHE n 
1 136 MET n 
1 137 GLU n 
1 138 GLU n 
1 139 LEU n 
1 140 GLY n 
1 141 LEU n 
1 142 ALA n 
1 143 GLY n 
1 144 GLU n 
1 145 ARG n 
1 146 LEU n 
1 147 LEU n 
1 148 LYS n 
1 149 LEU n 
1 150 THR n 
1 151 ALA n 
1 152 LEU n 
1 153 GLY n 
1 154 PHE n 
1 155 GLU n 
1 156 LEU n 
1 157 PRO n 
1 158 ILE n 
1 159 ASN n 
1 160 THR n 
1 161 PHE n 
1 162 THR n 
1 163 ASP n 
1 164 LEU n 
1 165 THR n 
1 166 ARG n 
1 167 ASP n 
1 168 GLY n 
1 169 TRP n 
1 170 HIS n 
1 171 HIS n 
1 172 MET n 
1 173 ARG n 
1 174 VAL n 
1 175 LEU n 
1 176 ARG n 
1 177 PHE n 
1 178 PRO n 
1 179 PRO n 
1 180 GLN n 
1 181 THR n 
1 182 SER n 
1 183 THR n 
1 184 LEU n 
1 185 SER n 
1 186 ARG n 
1 187 GLY n 
1 188 ILE n 
1 189 GLY n 
1 190 ALA n 
1 191 HIS n 
1 192 THR n 
1 193 ASP n 
1 194 TYR n 
1 195 GLY n 
1 196 LEU n 
1 197 LEU n 
1 198 VAL n 
1 199 ILE n 
1 200 ALA n 
1 201 ALA n 
1 202 GLN n 
1 203 ASP n 
1 204 ASP n 
1 205 VAL n 
1 206 GLY n 
1 207 GLY n 
1 208 LEU n 
1 209 TYR n 
1 210 ILE n 
1 211 ARG n 
1 212 PRO n 
1 213 PRO n 
1 214 VAL n 
1 215 GLU n 
1 216 GLY n 
1 217 GLU n 
1 218 LYS n 
1 219 ARG n 
1 220 ASN n 
1 221 ARG n 
1 222 ASN n 
1 223 TRP n 
1 224 LEU n 
1 225 PRO n 
1 226 GLY n 
1 227 GLU n 
1 228 SER n 
1 229 SER n 
1 230 ALA n 
1 231 GLY n 
1 232 MET n 
1 233 PHE n 
1 234 GLU n 
1 235 HIS n 
1 236 ASP n 
1 237 GLU n 
1 238 PRO n 
1 239 TRP n 
1 240 THR n 
1 241 PHE n 
1 242 VAL n 
1 243 THR n 
1 244 PRO n 
1 245 THR n 
1 246 PRO n 
1 247 GLY n 
1 248 VAL n 
1 249 TRP n 
1 250 THR n 
1 251 VAL n 
1 252 PHE n 
1 253 PRO n 
1 254 GLY n 
1 255 ASP n 
1 256 ILE n 
1 257 LEU n 
1 258 GLN n 
1 259 PHE n 
1 260 MET n 
1 261 THR n 
1 262 GLY n 
1 263 GLY n 
1 264 GLN n 
1 265 LEU n 
1 266 LEU n 
1 267 SER n 
1 268 THR n 
1 269 PRO n 
1 270 HIS n 
1 271 LYS n 
1 272 VAL n 
1 273 LYS n 
1 274 LEU n 
1 275 ASN n 
1 276 THR n 
1 277 ARG n 
1 278 GLU n 
1 279 ARG n 
1 280 PHE n 
1 281 ALA n 
1 282 CYS n 
1 283 ALA n 
1 284 TYR n 
1 285 PHE n 
1 286 HIS n 
1 287 GLU n 
1 288 PRO n 
1 289 ASN n 
1 290 PHE n 
1 291 GLU n 
1 292 ALA n 
1 293 SER n 
1 294 ALA n 
1 295 TYR n 
1 296 PRO n 
1 297 LEU n 
1 298 PHE n 
1 299 GLU n 
1 300 PRO n 
1 301 SER n 
1 302 ALA n 
1 303 ASN n 
1 304 GLU n 
1 305 ARG n 
1 306 ILE n 
1 307 HIS n 
1 308 TYR n 
1 309 GLY n 
1 310 GLU n 
1 311 HIS n 
1 312 PHE n 
1 313 THR n 
1 314 ASN n 
1 315 MET n 
1 316 PHE n 
1 317 MET n 
1 318 ARG n 
1 319 CYS n 
1 320 TYR n 
1 321 PRO n 
1 322 ASP n 
1 323 ARG n 
1 324 ILE n 
1 325 THR n 
1 326 THR n 
1 327 GLN n 
1 328 ARG n 
1 329 ILE n 
1 330 ASN n 
1 331 LYS n 
1 332 GLU n 
1 333 ASN n 
1 334 ARG n 
1 335 LEU n 
1 336 ALA n 
1 337 HIS n 
1 338 LEU n 
1 339 GLU n 
1 340 ASP n 
1 341 LEU n 
1 342 LYS n 
1 343 LYS n 
1 344 TYR n 
1 345 SER n 
1 346 ASP n 
1 347 THR n 
1 348 ARG n 
1 349 ALA n 
1 350 THR n 
1 351 GLY n 
1 352 SER n 
# 
_entity_src_gen.entity_id                          1 
_entity_src_gen.pdbx_src_id                        1 
_entity_src_gen.pdbx_alt_source_flag               sample 
_entity_src_gen.pdbx_seq_type                      'Biological sequence' 
_entity_src_gen.pdbx_beg_seq_num                   1 
_entity_src_gen.pdbx_end_seq_num                   352 
_entity_src_gen.gene_src_common_name               ? 
_entity_src_gen.gene_src_genus                     ? 
_entity_src_gen.pdbx_gene_src_gene                 efe 
_entity_src_gen.gene_src_species                   ? 
_entity_src_gen.gene_src_strain                    ? 
_entity_src_gen.gene_src_tissue                    ? 
_entity_src_gen.gene_src_tissue_fraction           ? 
_entity_src_gen.gene_src_details                   ? 
_entity_src_gen.pdbx_gene_src_fragment             ? 
_entity_src_gen.pdbx_gene_src_scientific_name      'Pseudomonas savastanoi pv. phaseolicola' 
_entity_src_gen.pdbx_gene_src_ncbi_taxonomy_id     319 
_entity_src_gen.pdbx_gene_src_variant              ? 
_entity_src_gen.pdbx_gene_src_cell_line            ? 
_entity_src_gen.pdbx_gene_src_atcc                 ? 
_entity_src_gen.pdbx_gene_src_organ                ? 
_entity_src_gen.pdbx_gene_src_organelle            ? 
_entity_src_gen.pdbx_gene_src_cell                 ? 
_entity_src_gen.pdbx_gene_src_cellular_location    ? 
_entity_src_gen.host_org_common_name               ? 
_entity_src_gen.pdbx_host_org_scientific_name      'Escherichia coli' 
_entity_src_gen.pdbx_host_org_ncbi_taxonomy_id     469008 
_entity_src_gen.host_org_genus                     ? 
_entity_src_gen.pdbx_host_org_gene                 ? 
_entity_src_gen.pdbx_host_org_organ                ? 
_entity_src_gen.host_org_species                   ? 
_entity_src_gen.pdbx_host_org_tissue               ? 
_entity_src_gen.pdbx_host_org_tissue_fraction      ? 
_entity_src_gen.pdbx_host_org_strain               'BL21 Gold (DE3)' 
_entity_src_gen.pdbx_host_org_variant              ? 
_entity_src_gen.pdbx_host_org_cell_line            ? 
_entity_src_gen.pdbx_host_org_atcc                 ? 
_entity_src_gen.pdbx_host_org_culture_collection   ? 
_entity_src_gen.pdbx_host_org_cell                 ? 
_entity_src_gen.pdbx_host_org_organelle            ? 
_entity_src_gen.pdbx_host_org_cellular_location    ? 
_entity_src_gen.pdbx_host_org_vector_type          plasmid 
_entity_src_gen.pdbx_host_org_vector               ? 
_entity_src_gen.host_org_details                   ? 
_entity_src_gen.expression_system_id               ? 
_entity_src_gen.plasmid_name                       pET28 
_entity_src_gen.plasmid_details                    ? 
_entity_src_gen.pdbx_description                   ? 
# 
_struct_ref.id                         1 
_struct_ref.db_name                    UNP 
_struct_ref.db_code                    EFE_PSESH 
_struct_ref.pdbx_db_accession          P32021 
_struct_ref.pdbx_db_isoform            ? 
_struct_ref.entity_id                  1 
_struct_ref.pdbx_seq_one_letter_code   
;MTNLQTFELPTEVTGCAADISLGRALIQAWQKDGIFQIKTDSEQDRKTQEAMAASKQFCKEPLTFKSSCVSDLTYSGYVA
SGEEVTAGKPDFPEIFTVCKDLSVGDQRVKAGWPCHGPVPWPNNTYQKSMKTFMEELGLAGERLLKLTALGFELPINTFT
DLTRDGWHHMRVLRFPPQTSTLSRGIGAHTDYGLLVIAAQDDVGGLYIRPPVEGEKRNRNWLPGESSAGMFEHDEPWTFV
TPTPGVWTVFPGDILQFMTGGQLLSTPHKVKLNTRERFACAYFHEPNFEASAYPLFEPSANERIHYGEHFTNMFMRCYPD
RITTQRINKENRLAHLEDLKKYSDTRATGS
;
_struct_ref.pdbx_align_begin           1 
# 
loop_
_struct_ref_seq.align_id 
_struct_ref_seq.ref_id 
_struct_ref_seq.pdbx_PDB_id_code 
_struct_ref_seq.pdbx_strand_id 
_struct_ref_seq.seq_align_beg 
_struct_ref_seq.pdbx_seq_align_beg_ins_code 
_struct_ref_seq.seq_align_end 
_struct_ref_seq.pdbx_seq_align_end_ins_code 
_struct_ref_seq.pdbx_db_accession 
_struct_ref_seq.db_align_beg 
_struct_ref_seq.pdbx_db_align_beg_ins_code 
_struct_ref_seq.db_align_end 
_struct_ref_seq.pdbx_db_align_end_ins_code 
_struct_ref_seq.pdbx_auth_seq_align_beg 
_struct_ref_seq.pdbx_auth_seq_align_end 
1 1 5V2X A 3 ? 352 ? P32021 1 ? 350 ? 1 350 
2 1 5V2X B 3 ? 352 ? P32021 1 ? 350 ? 1 350 
# 
loop_
_struct_ref_seq_dif.align_id 
_struct_ref_seq_dif.pdbx_pdb_id_code 
_struct_ref_seq_dif.mon_id 
_struct_ref_seq_dif.pdbx_pdb_strand_id 
_struct_ref_seq_dif.seq_num 
_struct_ref_seq_dif.pdbx_pdb_ins_code 
_struct_ref_seq_dif.pdbx_seq_db_name 
_struct_ref_seq_dif.pdbx_seq_db_accession_code 
_struct_ref_seq_dif.db_mon_id 
_struct_ref_seq_dif.pdbx_seq_db_seq_num 
_struct_ref_seq_dif.details 
_struct_ref_seq_dif.pdbx_auth_seq_num 
_struct_ref_seq_dif.pdbx_ordinal 
1 5V2X SER A 1 ? UNP P32021 ? ? 'expression tag' -1 1 
1 5V2X HIS A 2 ? UNP P32021 ? ? 'expression tag' 0  2 
2 5V2X SER B 1 ? UNP P32021 ? ? 'expression tag' -1 3 
2 5V2X HIS B 2 ? UNP P32021 ? ? 'expression tag' 0  4 
# 
loop_
_chem_comp.id 
_chem_comp.type 
_chem_comp.mon_nstd_flag 
_chem_comp.name 
_chem_comp.pdbx_synonyms 
_chem_comp.formula 
_chem_comp.formula_weight 
AKG non-polymer         . '2-OXOGLUTARIC ACID' ? 'C5 H6 O5'       146.098 
ALA 'L-peptide linking' y ALANINE              ? 'C3 H7 N O2'     89.093  
ARG 'L-peptide linking' y ARGININE             ? 'C6 H15 N4 O2 1' 175.209 
ASN 'L-peptide linking' y ASPARAGINE           ? 'C4 H8 N2 O3'    132.118 
ASP 'L-peptide linking' y 'ASPARTIC ACID'      ? 'C4 H7 N O4'     133.103 
CYS 'L-peptide linking' y CYSTEINE             ? 'C3 H7 N O2 S'   121.158 
GLN 'L-peptide linking' y GLUTAMINE            ? 'C5 H10 N2 O3'   146.144 
GLU 'L-peptide linking' y 'GLUTAMIC ACID'      ? 'C5 H9 N O4'     147.129 
GLY 'peptide linking'   y GLYCINE              ? 'C2 H5 N O2'     75.067  
HIS 'L-peptide linking' y HISTIDINE            ? 'C6 H10 N3 O2 1' 156.162 
HOH non-polymer         . WATER                ? 'H2 O'           18.015  
ILE 'L-peptide linking' y ISOLEUCINE           ? 'C6 H13 N O2'    131.173 
LEU 'L-peptide linking' y LEUCINE              ? 'C6 H13 N O2'    131.173 
LYS 'L-peptide linking' y LYSINE               ? 'C6 H15 N2 O2 1' 147.195 
MET 'L-peptide linking' y METHIONINE           ? 'C5 H11 N O2 S'  149.211 
MN  non-polymer         . 'MANGANESE (II) ION' ? 'Mn 2'           54.938  
PHE 'L-peptide linking' y PHENYLALANINE        ? 'C9 H11 N O2'    165.189 
PRO 'L-peptide linking' y PROLINE              ? 'C5 H9 N O2'     115.130 
SER 'L-peptide linking' y SERINE               ? 'C3 H7 N O3'     105.093 
THR 'L-peptide linking' y THREONINE            ? 'C4 H9 N O3'     119.119 
TRP 'L-peptide linking' y TRYPTOPHAN           ? 'C11 H12 N2 O2'  204.225 
TYR 'L-peptide linking' y TYROSINE             ? 'C9 H11 N O3'    181.189 
VAL 'L-peptide linking' y VALINE               ? 'C5 H11 N O2'    117.146 
# 
_exptl.absorpt_coefficient_mu     ? 
_exptl.absorpt_correction_T_max   ? 
_exptl.absorpt_correction_T_min   ? 
_exptl.absorpt_correction_type    ? 
_exptl.absorpt_process_details    ? 
_exptl.entry_id                   5V2X 
_exptl.crystals_number            1 
_exptl.details                    ? 
_exptl.method                     'X-RAY DIFFRACTION' 
_exptl.method_details             ? 
# 
_exptl_crystal.colour                      ? 
_exptl_crystal.density_diffrn              ? 
_exptl_crystal.density_Matthews            2.34 
_exptl_crystal.density_method              ? 
_exptl_crystal.density_percent_sol         47.41 
_exptl_crystal.description                 ? 
_exptl_crystal.F_000                       ? 
_exptl_crystal.id                          1 
_exptl_crystal.preparation                 ? 
_exptl_crystal.size_max                    ? 
_exptl_crystal.size_mid                    ? 
_exptl_crystal.size_min                    ? 
_exptl_crystal.size_rad                    ? 
_exptl_crystal.colour_lustre               ? 
_exptl_crystal.colour_modifier             ? 
_exptl_crystal.colour_primary              ? 
_exptl_crystal.density_meas                ? 
_exptl_crystal.density_meas_esd            ? 
_exptl_crystal.density_meas_gt             ? 
_exptl_crystal.density_meas_lt             ? 
_exptl_crystal.density_meas_temp           ? 
_exptl_crystal.density_meas_temp_esd       ? 
_exptl_crystal.density_meas_temp_gt        ? 
_exptl_crystal.density_meas_temp_lt        ? 
_exptl_crystal.pdbx_crystal_image_url      ? 
_exptl_crystal.pdbx_crystal_image_format   ? 
_exptl_crystal.pdbx_mosaicity              0.120 
_exptl_crystal.pdbx_mosaicity_esd          ? 
# 
_exptl_crystal_grow.apparatus       ? 
_exptl_crystal_grow.atmosphere      ? 
_exptl_crystal_grow.crystal_id      1 
_exptl_crystal_grow.details         ? 
_exptl_crystal_grow.method          'VAPOR DIFFUSION, SITTING DROP' 
_exptl_crystal_grow.method_ref      ? 
_exptl_crystal_grow.pH              8.0 
_exptl_crystal_grow.pressure        ? 
_exptl_crystal_grow.pressure_esd    ? 
_exptl_crystal_grow.seeding         ? 
_exptl_crystal_grow.seeding_ref     ? 
_exptl_crystal_grow.temp            277.15 
_exptl_crystal_grow.temp_details    ? 
_exptl_crystal_grow.temp_esd        ? 
_exptl_crystal_grow.time            ? 
_exptl_crystal_grow.pdbx_details    
;0.18 ul 15.2 mg/ml EFE (25 mM HEPES pH 8.0, 1 mM TCEP, 0.6 mM 2-oxoglutarate) was mixed with 0.18 ul reservoir solution. The sitting drop reservoir of 50 ul contained 0.2 M lithium chloride, 0.1 M Tris-HCl pH 8.0, 20% w/v Polyethylene glycol 6,000. The crystal was soaked for about a minute in 25% glycerol, 75% reservoir solution before freezing it.
;
_exptl_crystal_grow.pdbx_pH_range   ? 
# 
_diffrn.ambient_environment    ? 
_diffrn.ambient_temp           100 
_diffrn.ambient_temp_details   ? 
_diffrn.ambient_temp_esd       ? 
_diffrn.crystal_id             1 
_diffrn.crystal_support        ? 
_diffrn.crystal_treatment      ? 
_diffrn.details                ? 
_diffrn.id                     1 
_diffrn.ambient_pressure       ? 
_diffrn.ambient_pressure_esd   ? 
_diffrn.ambient_pressure_gt    ? 
_diffrn.ambient_pressure_lt    ? 
_diffrn.ambient_temp_gt        ? 
_diffrn.ambient_temp_lt        ? 
# 
_diffrn_detector.details                      ? 
_diffrn_detector.detector                     CCD 
_diffrn_detector.diffrn_id                    1 
_diffrn_detector.type                         'MARMOSAIC 300 mm CCD' 
_diffrn_detector.area_resol_mean              ? 
_diffrn_detector.dtime                        ? 
_diffrn_detector.pdbx_frames_total            ? 
_diffrn_detector.pdbx_collection_time_total   ? 
_diffrn_detector.pdbx_collection_date         2016-10-16 
# 
_diffrn_radiation.collimation                      ? 
_diffrn_radiation.diffrn_id                        1 
_diffrn_radiation.filter_edge                      ? 
_diffrn_radiation.inhomogeneity                    ? 
_diffrn_radiation.monochromator                    ? 
_diffrn_radiation.polarisn_norm                    ? 
_diffrn_radiation.polarisn_ratio                   ? 
_diffrn_radiation.probe                            ? 
_diffrn_radiation.type                             ? 
_diffrn_radiation.xray_symbol                      ? 
_diffrn_radiation.wavelength_id                    1 
_diffrn_radiation.pdbx_monochromatic_or_laue_m_l   M 
_diffrn_radiation.pdbx_wavelength_list             ? 
_diffrn_radiation.pdbx_wavelength                  ? 
_diffrn_radiation.pdbx_diffrn_protocol             'SINGLE WAVELENGTH' 
_diffrn_radiation.pdbx_analyzer                    ? 
_diffrn_radiation.pdbx_scattering_type             x-ray 
# 
_diffrn_radiation_wavelength.id           1 
_diffrn_radiation_wavelength.wavelength   0.9787 
_diffrn_radiation_wavelength.wt           1.0 
# 
_diffrn_source.current                     ? 
_diffrn_source.details                     ? 
_diffrn_source.diffrn_id                   1 
_diffrn_source.power                       ? 
_diffrn_source.size                        ? 
_diffrn_source.source                      SYNCHROTRON 
_diffrn_source.target                      ? 
_diffrn_source.type                        'APS BEAMLINE 21-ID-F' 
_diffrn_source.voltage                     ? 
_diffrn_source.take-off_angle              ? 
_diffrn_source.pdbx_wavelength_list        0.9787 
_diffrn_source.pdbx_wavelength             ? 
_diffrn_source.pdbx_synchrotron_beamline   21-ID-F 
_diffrn_source.pdbx_synchrotron_site       APS 
# 
_reflns.B_iso_Wilson_estimate            13.490 
_reflns.entry_id                         5V2X 
_reflns.data_reduction_details           ? 
_reflns.data_reduction_method            ? 
_reflns.d_resolution_high                1.8470 
_reflns.d_resolution_low                 45.330 
_reflns.details                          ? 
_reflns.limit_h_max                      ? 
_reflns.limit_h_min                      ? 
_reflns.limit_k_max                      ? 
_reflns.limit_k_min                      ? 
_reflns.limit_l_max                      ? 
_reflns.limit_l_min                      ? 
_reflns.number_all                       ? 
_reflns.number_obs                       64351 
_reflns.observed_criterion               ? 
_reflns.observed_criterion_F_max         ? 
_reflns.observed_criterion_F_min         ? 
_reflns.observed_criterion_I_max         ? 
_reflns.observed_criterion_I_min         ? 
_reflns.observed_criterion_sigma_F       ? 
_reflns.observed_criterion_sigma_I       ? 
_reflns.percent_possible_obs             99.600 
_reflns.R_free_details                   ? 
_reflns.Rmerge_F_all                     ? 
_reflns.Rmerge_F_obs                     ? 
_reflns.Friedel_coverage                 ? 
_reflns.number_gt                        ? 
_reflns.threshold_expression             ? 
_reflns.pdbx_redundancy                  5.800 
_reflns.pdbx_Rmerge_I_obs                0.131 
_reflns.pdbx_Rmerge_I_all                ? 
_reflns.pdbx_Rsym_value                  ? 
_reflns.pdbx_netI_over_av_sigmaI         ? 
_reflns.pdbx_netI_over_sigmaI            11.600 
_reflns.pdbx_res_netI_over_av_sigmaI_2   ? 
_reflns.pdbx_res_netI_over_sigmaI_2      ? 
_reflns.pdbx_chi_squared                 ? 
_reflns.pdbx_scaling_rejects             ? 
_reflns.pdbx_d_res_high_opt              ? 
_reflns.pdbx_d_res_low_opt               ? 
_reflns.pdbx_d_res_opt_method            ? 
_reflns.phase_calculation_details        ? 
_reflns.pdbx_Rrim_I_all                  0.145 
_reflns.pdbx_Rpim_I_all                  0.060 
_reflns.pdbx_d_opt                       ? 
_reflns.pdbx_number_measured_all         ? 
_reflns.pdbx_diffrn_id                   1 
_reflns.pdbx_ordinal                     1 
_reflns.pdbx_CC_half                     0.997 
_reflns.pdbx_R_split                     ? 
# 
loop_
_reflns_shell.d_res_high 
_reflns_shell.d_res_low 
_reflns_shell.meanI_over_sigI_all 
_reflns_shell.meanI_over_sigI_obs 
_reflns_shell.number_measured_all 
_reflns_shell.number_measured_obs 
_reflns_shell.number_possible 
_reflns_shell.number_unique_all 
_reflns_shell.number_unique_obs 
_reflns_shell.percent_possible_all 
_reflns_shell.percent_possible_obs 
_reflns_shell.Rmerge_F_all 
_reflns_shell.Rmerge_F_obs 
_reflns_shell.Rmerge_I_all 
_reflns_shell.Rmerge_I_obs 
_reflns_shell.meanI_over_sigI_gt 
_reflns_shell.meanI_over_uI_all 
_reflns_shell.meanI_over_uI_gt 
_reflns_shell.number_measured_gt 
_reflns_shell.number_unique_gt 
_reflns_shell.percent_possible_gt 
_reflns_shell.Rmerge_F_gt 
_reflns_shell.Rmerge_I_gt 
_reflns_shell.pdbx_redundancy 
_reflns_shell.pdbx_Rsym_value 
_reflns_shell.pdbx_chi_squared 
_reflns_shell.pdbx_netI_over_sigmaI_all 
_reflns_shell.pdbx_netI_over_sigmaI_obs 
_reflns_shell.pdbx_Rrim_I_all 
_reflns_shell.pdbx_Rpim_I_all 
_reflns_shell.pdbx_rejects 
_reflns_shell.pdbx_ordinal 
_reflns_shell.pdbx_diffrn_id 
_reflns_shell.pdbx_CC_half 
_reflns_shell.pdbx_R_split 
1.847 1.890  ? ? ? ? ? ? ? 95.900 ? ? ? ? 0.744 ? ? ? ? ? ? ? ? 5.600 ? ? ? ? 0.820 0.341 ? 1 1 0.830 ? 
9.050 45.330 ? ? ? ? ? ? ? 98.500 ? ? ? ? 0.030 ? ? ? ? ? ? ? ? 4.800 ? ? ? ? 0.033 0.015 ? 2 1 0.999 ? 
# 
_computing.entry_id                           5V2X 
_computing.cell_refinement                    XDS 
_computing.data_collection                    ? 
_computing.data_reduction                     ? 
_computing.molecular_graphics                 ? 
_computing.publication_material               ? 
_computing.structure_refinement               PHENIX 
_computing.structure_solution                 PHASER 
_computing.pdbx_structure_refinement_method   ? 
_computing.pdbx_data_reduction_ii             XDS 
_computing.pdbx_data_reduction_ds             AIMLESS 
# 
_refine.aniso_B[1][1]                            ? 
_refine.aniso_B[1][2]                            ? 
_refine.aniso_B[1][3]                            ? 
_refine.aniso_B[2][2]                            ? 
_refine.aniso_B[2][3]                            ? 
_refine.aniso_B[3][3]                            ? 
_refine.B_iso_max                                65.420 
_refine.B_iso_mean                               18.1260 
_refine.B_iso_min                                5.450 
_refine.correlation_coeff_Fo_to_Fc               ? 
_refine.correlation_coeff_Fo_to_Fc_free          ? 
_refine.details                                  ? 
_refine.diff_density_max                         ? 
_refine.diff_density_max_esd                     ? 
_refine.diff_density_min                         ? 
_refine.diff_density_min_esd                     ? 
_refine.diff_density_rms                         ? 
_refine.diff_density_rms_esd                     ? 
_refine.entry_id                                 5V2X 
_refine.pdbx_refine_id                           'X-RAY DIFFRACTION' 
_refine.ls_abs_structure_details                 ? 
_refine.ls_abs_structure_Flack                   ? 
_refine.ls_abs_structure_Flack_esd               ? 
_refine.ls_abs_structure_Rogers                  ? 
_refine.ls_abs_structure_Rogers_esd              ? 
_refine.ls_d_res_high                            1.8470 
_refine.ls_d_res_low                             44.0320 
_refine.ls_extinction_coef                       ? 
_refine.ls_extinction_coef_esd                   ? 
_refine.ls_extinction_expression                 ? 
_refine.ls_extinction_method                     ? 
_refine.ls_goodness_of_fit_all                   ? 
_refine.ls_goodness_of_fit_all_esd               ? 
_refine.ls_goodness_of_fit_obs                   ? 
_refine.ls_goodness_of_fit_obs_esd               ? 
_refine.ls_hydrogen_treatment                    ? 
_refine.ls_matrix_type                           ? 
_refine.ls_number_constraints                    ? 
_refine.ls_number_parameters                     ? 
_refine.ls_number_reflns_all                     ? 
_refine.ls_number_reflns_obs                     61427 
_refine.ls_number_reflns_R_free                  3316 
_refine.ls_number_reflns_R_work                  ? 
_refine.ls_number_restraints                     ? 
_refine.ls_percent_reflns_obs                    99.5300 
_refine.ls_percent_reflns_R_free                 5.1800 
_refine.ls_R_factor_all                          ? 
_refine.ls_R_factor_obs                          0.1645 
_refine.ls_R_factor_R_free                       0.2008 
_refine.ls_R_factor_R_free_error                 ? 
_refine.ls_R_factor_R_free_error_details         ? 
_refine.ls_R_factor_R_work                       0.1625 
_refine.ls_R_Fsqd_factor_obs                     ? 
_refine.ls_R_I_factor_obs                        ? 
_refine.ls_redundancy_reflns_all                 ? 
_refine.ls_redundancy_reflns_obs                 ? 
_refine.ls_restrained_S_all                      ? 
_refine.ls_restrained_S_obs                      ? 
_refine.ls_shift_over_esd_max                    ? 
_refine.ls_shift_over_esd_mean                   ? 
_refine.ls_structure_factor_coef                 ? 
_refine.ls_weighting_details                     ? 
_refine.ls_weighting_scheme                      ? 
_refine.ls_wR_factor_all                         ? 
_refine.ls_wR_factor_obs                         ? 
_refine.ls_wR_factor_R_free                      ? 
_refine.ls_wR_factor_R_work                      ? 
_refine.occupancy_max                            ? 
_refine.occupancy_min                            ? 
_refine.solvent_model_details                    ? 
_refine.solvent_model_param_bsol                 ? 
_refine.solvent_model_param_ksol                 ? 
_refine.ls_R_factor_gt                           ? 
_refine.ls_goodness_of_fit_gt                    ? 
_refine.ls_goodness_of_fit_ref                   ? 
_refine.ls_shift_over_su_max                     ? 
_refine.ls_shift_over_su_max_lt                  ? 
_refine.ls_shift_over_su_mean                    ? 
_refine.ls_shift_over_su_mean_lt                 ? 
_refine.pdbx_ls_sigma_I                          ? 
_refine.pdbx_ls_sigma_F                          1.970 
_refine.pdbx_ls_sigma_Fsqd                       ? 
_refine.pdbx_data_cutoff_high_absF               ? 
_refine.pdbx_data_cutoff_high_rms_absF           ? 
_refine.pdbx_data_cutoff_low_absF                ? 
_refine.pdbx_isotropic_thermal_model             ? 
_refine.pdbx_ls_cross_valid_method               'FREE R-VALUE' 
_refine.pdbx_method_to_determine_struct          'MOLECULAR REPLACEMENT' 
_refine.pdbx_starting_model                      5V2T 
_refine.pdbx_stereochemistry_target_values       ? 
_refine.pdbx_R_Free_selection_details            ? 
_refine.pdbx_stereochem_target_val_spec_case     ? 
_refine.pdbx_overall_ESU_R                       ? 
_refine.pdbx_overall_ESU_R_Free                  ? 
_refine.pdbx_solvent_vdw_probe_radii             1.1100 
_refine.pdbx_solvent_ion_probe_radii             ? 
_refine.pdbx_solvent_shrinkage_radii             0.9000 
_refine.pdbx_real_space_R                        ? 
_refine.pdbx_density_correlation                 ? 
_refine.pdbx_pd_number_of_powder_patterns        ? 
_refine.pdbx_pd_number_of_points                 ? 
_refine.pdbx_pd_meas_number_of_points            ? 
_refine.pdbx_pd_proc_ls_prof_R_factor            ? 
_refine.pdbx_pd_proc_ls_prof_wR_factor           ? 
_refine.pdbx_pd_Marquardt_correlation_coeff      ? 
_refine.pdbx_pd_Fsqrd_R_factor                   ? 
_refine.pdbx_pd_ls_matrix_band_width             ? 
_refine.pdbx_overall_phase_error                 20.6000 
_refine.pdbx_overall_SU_R_free_Cruickshank_DPI   ? 
_refine.pdbx_overall_SU_R_free_Blow_DPI          ? 
_refine.pdbx_overall_SU_R_Blow_DPI               ? 
_refine.pdbx_TLS_residual_ADP_flag               ? 
_refine.pdbx_diffrn_id                           1 
_refine.overall_SU_B                             ? 
_refine.overall_SU_ML                            0.1700 
_refine.overall_SU_R_Cruickshank_DPI             ? 
_refine.overall_SU_R_free                        ? 
_refine.overall_FOM_free_R_set                   ? 
_refine.overall_FOM_work_R_set                   ? 
_refine.pdbx_average_fsc_overall                 ? 
_refine.pdbx_average_fsc_work                    ? 
_refine.pdbx_average_fsc_free                    ? 
# 
_refine_analyze.entry_id                        5V2X 
_refine_analyze.pdbx_refine_id                  'X-RAY DIFFRACTION' 
_refine_analyze.Luzzati_coordinate_error_free   ? 
_refine_analyze.Luzzati_coordinate_error_obs    ? 
_refine_analyze.Luzzati_d_res_low_free          ? 
_refine_analyze.Luzzati_d_res_low_obs           ? 
_refine_analyze.Luzzati_sigma_a_free            ? 
_refine_analyze.Luzzati_sigma_a_free_details    ? 
_refine_analyze.Luzzati_sigma_a_obs             ? 
_refine_analyze.Luzzati_sigma_a_obs_details     ? 
_refine_analyze.number_disordered_residues      ? 
_refine_analyze.occupancy_sum_hydrogen          ? 
_refine_analyze.occupancy_sum_non_hydrogen      ? 
_refine_analyze.RG_d_res_high                   ? 
_refine_analyze.RG_d_res_low                    ? 
_refine_analyze.RG_free                         ? 
_refine_analyze.RG_work                         ? 
_refine_analyze.RG_free_work_ratio              ? 
_refine_analyze.pdbx_Luzzati_d_res_high_obs     ? 
# 
_refine_hist.cycle_id                         final 
_refine_hist.pdbx_refine_id                   'X-RAY DIFFRACTION' 
_refine_hist.d_res_high                       1.8470 
_refine_hist.d_res_low                        44.0320 
_refine_hist.pdbx_number_atoms_ligand         42 
_refine_hist.number_atoms_solvent             994 
_refine_hist.number_atoms_total               6508 
_refine_hist.pdbx_number_residues_total       690 
_refine_hist.pdbx_B_iso_mean_ligand           18.20 
_refine_hist.pdbx_B_iso_mean_solvent          29.97 
_refine_hist.pdbx_number_atoms_protein        5472 
_refine_hist.pdbx_number_atoms_nucleic_acid   0 
# 
loop_
_refine_ls_restr.pdbx_refine_id 
_refine_ls_restr.criterion 
_refine_ls_restr.dev_ideal 
_refine_ls_restr.dev_ideal_target 
_refine_ls_restr.number 
_refine_ls_restr.rejects 
_refine_ls_restr.type 
_refine_ls_restr.weight 
_refine_ls_restr.pdbx_restraint_function 
'X-RAY DIFFRACTION' ? 0.007 ? 5717 ? f_bond_d           ? ? 
'X-RAY DIFFRACTION' ? 0.750 ? 7754 ? f_angle_d          ? ? 
'X-RAY DIFFRACTION' ? 0.049 ? 821  ? f_chiral_restr     ? ? 
'X-RAY DIFFRACTION' ? 0.006 ? 1022 ? f_plane_restr      ? ? 
'X-RAY DIFFRACTION' ? 3.048 ? 4702 ? f_dihedral_angle_d ? ? 
# 
loop_
_refine_ls_shell.pdbx_refine_id 
_refine_ls_shell.d_res_high 
_refine_ls_shell.d_res_low 
_refine_ls_shell.number_reflns_all 
_refine_ls_shell.number_reflns_obs 
_refine_ls_shell.number_reflns_R_free 
_refine_ls_shell.number_reflns_R_work 
_refine_ls_shell.percent_reflns_obs 
_refine_ls_shell.percent_reflns_R_free 
_refine_ls_shell.R_factor_all 
_refine_ls_shell.R_factor_obs 
_refine_ls_shell.R_factor_R_free 
_refine_ls_shell.R_factor_R_free_error 
_refine_ls_shell.R_factor_R_work 
_refine_ls_shell.redundancy_reflns_all 
_refine_ls_shell.redundancy_reflns_obs 
_refine_ls_shell.wR_factor_all 
_refine_ls_shell.wR_factor_obs 
_refine_ls_shell.wR_factor_R_free 
_refine_ls_shell.wR_factor_R_work 
_refine_ls_shell.pdbx_total_number_of_bins_used 
_refine_ls_shell.pdbx_phase_error 
_refine_ls_shell.pdbx_fsc_work 
_refine_ls_shell.pdbx_fsc_free 
'X-RAY DIFFRACTION' 1.8473 1.8683  3731 . 160 3571 91.0000  . . . 0.2635 0.0000 0.2587 . . . . . . 30 . . . 
'X-RAY DIFFRACTION' 1.8683 1.8903  4143 . 204 3939 100.0000 . . . 0.2906 0.0000 0.2346 . . . . . . 30 . . . 
'X-RAY DIFFRACTION' 1.8903 1.9134  4117 . 189 3928 100.0000 . . . 0.3011 0.0000 0.2396 . . . . . . 30 . . . 
'X-RAY DIFFRACTION' 1.9134 1.9376  4093 . 190 3903 100.0000 . . . 0.2269 0.0000 0.2330 . . . . . . 30 . . . 
'X-RAY DIFFRACTION' 1.9376 1.9631  4089 . 188 3901 100.0000 . . . 0.2856 0.0000 0.2259 . . . . . . 30 . . . 
'X-RAY DIFFRACTION' 1.9631 1.9900  4123 . 211 3912 100.0000 . . . 0.2403 0.0000 0.2149 . . . . . . 30 . . . 
'X-RAY DIFFRACTION' 1.9900 2.0184  4106 . 251 3855 100.0000 . . . 0.2479 0.0000 0.2120 . . . . . . 30 . . . 
'X-RAY DIFFRACTION' 2.0184 2.0485  4118 . 217 3901 100.0000 . . . 0.2295 0.0000 0.2038 . . . . . . 30 . . . 
'X-RAY DIFFRACTION' 2.0485 2.0805  4140 . 178 3962 100.0000 . . . 0.2375 0.0000 0.1928 . . . . . . 30 . . . 
'X-RAY DIFFRACTION' 2.0805 2.1147  4093 . 219 3874 100.0000 . . . 0.2395 0.0000 0.1839 . . . . . . 30 . . . 
'X-RAY DIFFRACTION' 2.1147 2.1511  4099 . 219 3880 100.0000 . . . 0.2196 0.0000 0.1761 . . . . . . 30 . . . 
'X-RAY DIFFRACTION' 2.1511 2.1902  4103 . 239 3864 100.0000 . . . 0.2315 0.0000 0.1814 . . . . . . 30 . . . 
'X-RAY DIFFRACTION' 2.1902 2.2324  4082 . 232 3850 100.0000 . . . 0.1805 0.0000 0.1671 . . . . . . 30 . . . 
'X-RAY DIFFRACTION' 2.2324 2.2779  4144 . 250 3894 100.0000 . . . 0.2049 0.0000 0.1710 . . . . . . 30 . . . 
'X-RAY DIFFRACTION' 2.2779 2.3274  4072 . 236 3836 100.0000 . . . 0.2146 0.0000 0.1653 . . . . . . 30 . . . 
'X-RAY DIFFRACTION' 2.3274 2.3816  4113 . 219 3894 100.0000 . . . 0.1988 0.0000 0.1579 . . . . . . 30 . . . 
'X-RAY DIFFRACTION' 2.3816 2.4411  4105 . 176 3929 100.0000 . . . 0.2186 0.0000 0.1510 . . . . . . 30 . . . 
'X-RAY DIFFRACTION' 2.4411 2.5071  4126 . 233 3893 100.0000 . . . 0.2031 0.0000 0.1520 . . . . . . 30 . . . 
'X-RAY DIFFRACTION' 2.5071 2.5809  4114 . 216 3898 100.0000 . . . 0.1840 0.0000 0.1476 . . . . . . 30 . . . 
'X-RAY DIFFRACTION' 2.5809 2.6642  4095 . 199 3896 100.0000 . . . 0.2289 0.0000 0.1522 . . . . . . 30 . . . 
'X-RAY DIFFRACTION' 2.6642 2.7594  4092 . 232 3860 100.0000 . . . 0.1899 0.0000 0.1488 . . . . . . 30 . . . 
'X-RAY DIFFRACTION' 2.7594 2.8699  4147 . 190 3957 100.0000 . . . 0.1997 0.0000 0.1454 . . . . . . 30 . . . 
'X-RAY DIFFRACTION' 2.8699 3.0005  4054 . 203 3851 100.0000 . . . 0.2020 0.0000 0.1539 . . . . . . 30 . . . 
'X-RAY DIFFRACTION' 3.0005 3.1586  4141 . 186 3955 100.0000 . . . 0.2027 0.0000 0.1519 . . . . . . 30 . . . 
'X-RAY DIFFRACTION' 3.1586 3.3564  4106 . 268 3838 100.0000 . . . 0.1818 0.0000 0.1457 . . . . . . 30 . . . 
'X-RAY DIFFRACTION' 3.3564 3.6155  4128 . 233 3895 100.0000 . . . 0.1589 0.0000 0.1310 . . . . . . 30 . . . 
'X-RAY DIFFRACTION' 3.6155 3.9791  4083 . 231 3852 100.0000 . . . 0.1581 0.0000 0.1254 . . . . . . 30 . . . 
'X-RAY DIFFRACTION' 3.9791 4.5544  4134 . 210 3924 100.0000 . . . 0.1451 0.0000 0.1142 . . . . . . 30 . . . 
'X-RAY DIFFRACTION' 4.5544 5.7360  4090 . 180 3910 100.0000 . . . 0.1674 0.0000 0.1402 . . . . . . 30 . . . 
'X-RAY DIFFRACTION' 5.7360 44.0447 4074 . 205 3869 99.0000  . . . 0.2175 0.0000 0.1774 . . . . . . 30 . . . 
# 
_struct.entry_id                     5V2X 
_struct.title                        'Ethylene forming enzyme in complex with manganese and 2-oxoglutarate' 
_struct.pdbx_descriptor              '2-oxoglutarate-dependent ethylene/succinate-forming enzyme (E.C.1.13.12.19,1.14.11.34)' 
_struct.pdbx_model_details           ? 
_struct.pdbx_formula_weight          ? 
_struct.pdbx_formula_weight_method   ? 
_struct.pdbx_model_type_details      ? 
_struct.pdbx_CASP_flag               N 
# 
_struct_keywords.entry_id        5V2X 
_struct_keywords.text            
'alpha-Ketoglutaric acid, 2-Ketoglutaric acid, 2-Oxoglutaric acid, Oxoglutaric acid, ethylene biosynthesis, OXIDOREDUCTASE' 
_struct_keywords.pdbx_keywords   OXIDOREDUCTASE 
# 
loop_
_struct_asym.id 
_struct_asym.pdbx_blank_PDB_chainid_flag 
_struct_asym.pdbx_modified 
_struct_asym.entity_id 
_struct_asym.details 
A N N 1 ? 
B N N 1 ? 
C N N 2 ? 
D N N 3 ? 
E N N 3 ? 
F N N 2 ? 
G N N 3 ? 
H N N 3 ? 
I N N 4 ? 
J N N 4 ? 
# 
loop_
_struct_conf.conf_type_id 
_struct_conf.id 
_struct_conf.pdbx_PDB_helix_id 
_struct_conf.beg_label_comp_id 
_struct_conf.beg_label_asym_id 
_struct_conf.beg_label_seq_id 
_struct_conf.pdbx_beg_PDB_ins_code 
_struct_conf.end_label_comp_id 
_struct_conf.end_label_asym_id 
_struct_conf.end_label_seq_id 
_struct_conf.pdbx_end_PDB_ins_code 
_struct_conf.beg_auth_comp_id 
_struct_conf.beg_auth_asym_id 
_struct_conf.beg_auth_seq_id 
_struct_conf.end_auth_comp_id 
_struct_conf.end_auth_asym_id 
_struct_conf.end_auth_seq_id 
_struct_conf.pdbx_PDB_helix_class 
_struct_conf.details 
_struct_conf.pdbx_PDB_helix_length 
HELX_P HELX_P1  AA1 CYS A 18  ? GLY A 36  ? CYS A 16  GLY A 34  1 ? 19 
HELX_P HELX_P2  AA2 ASP A 43  ? LYS A 62  ? ASP A 41  LYS A 60  1 ? 20 
HELX_P HELX_P3  AA3 PRO A 64  ? SER A 70  ? PRO A 62  SER A 68  1 ? 7  
HELX_P HELX_P4  AA4 ASP A 108 ? ALA A 113 ? ASP A 106 ALA A 111 1 ? 6  
HELX_P HELX_P5  AA5 ASN A 125 ? PHE A 154 ? ASN A 123 PHE A 152 1 ? 30 
HELX_P HELX_P6  AA6 GLY A 254 ? THR A 261 ? GLY A 252 THR A 259 1 ? 8  
HELX_P HELX_P7  AA7 TYR A 308 ? TYR A 320 ? TYR A 306 TYR A 318 1 ? 13 
HELX_P HELX_P8  AA8 ARG A 323 ? ASN A 333 ? ARG A 321 ASN A 331 1 ? 11 
HELX_P HELX_P9  AA9 LEU A 335 ? SER A 345 ? LEU A 333 SER A 343 1 ? 11 
HELX_P HELX_P10 AB1 CYS B 18  ? GLY B 36  ? CYS B 16  GLY B 34  1 ? 19 
HELX_P HELX_P11 AB2 ASP B 43  ? LYS B 62  ? ASP B 41  LYS B 60  1 ? 20 
HELX_P HELX_P12 AB3 PRO B 64  ? SER B 70  ? PRO B 62  SER B 68  1 ? 7  
HELX_P HELX_P13 AB4 ASP B 108 ? ALA B 113 ? ASP B 106 ALA B 111 1 ? 6  
HELX_P HELX_P14 AB5 ASN B 125 ? PHE B 154 ? ASN B 123 PHE B 152 1 ? 30 
HELX_P HELX_P15 AB6 GLY B 254 ? THR B 261 ? GLY B 252 THR B 259 1 ? 8  
HELX_P HELX_P16 AB7 TYR B 308 ? TYR B 320 ? TYR B 306 TYR B 318 1 ? 13 
HELX_P HELX_P17 AB8 ARG B 323 ? ASN B 333 ? ARG B 321 ASN B 331 1 ? 11 
HELX_P HELX_P18 AB9 LEU B 335 ? SER B 345 ? LEU B 333 SER B 343 1 ? 11 
# 
_struct_conf_type.id          HELX_P 
_struct_conf_type.criteria    ? 
_struct_conf_type.reference   ? 
# 
loop_
_struct_conn.id 
_struct_conn.conn_type_id 
_struct_conn.pdbx_leaving_atom_flag 
_struct_conn.pdbx_PDB_id 
_struct_conn.ptnr1_label_asym_id 
_struct_conn.ptnr1_label_comp_id 
_struct_conn.ptnr1_label_seq_id 
_struct_conn.ptnr1_label_atom_id 
_struct_conn.pdbx_ptnr1_label_alt_id 
_struct_conn.pdbx_ptnr1_PDB_ins_code 
_struct_conn.pdbx_ptnr1_standard_comp_id 
_struct_conn.ptnr1_symmetry 
_struct_conn.ptnr2_label_asym_id 
_struct_conn.ptnr2_label_comp_id 
_struct_conn.ptnr2_label_seq_id 
_struct_conn.ptnr2_label_atom_id 
_struct_conn.pdbx_ptnr2_label_alt_id 
_struct_conn.pdbx_ptnr2_PDB_ins_code 
_struct_conn.ptnr1_auth_asym_id 
_struct_conn.ptnr1_auth_comp_id 
_struct_conn.ptnr1_auth_seq_id 
_struct_conn.ptnr2_auth_asym_id 
_struct_conn.ptnr2_auth_comp_id 
_struct_conn.ptnr2_auth_seq_id 
_struct_conn.ptnr2_symmetry 
_struct_conn.pdbx_ptnr3_label_atom_id 
_struct_conn.pdbx_ptnr3_label_seq_id 
_struct_conn.pdbx_ptnr3_label_comp_id 
_struct_conn.pdbx_ptnr3_label_asym_id 
_struct_conn.pdbx_ptnr3_label_alt_id 
_struct_conn.pdbx_ptnr3_PDB_ins_code 
_struct_conn.details 
_struct_conn.pdbx_dist_value 
_struct_conn.pdbx_value_order 
metalc1  metalc ? ? A HIS 191 NE2 ? ? ? 1_555 C MN  . MN ? ? A HIS 189 A MN  401 1_555 ? ? ? ? ? ? ? 2.241 ? 
metalc2  metalc ? ? A ASP 193 OD1 ? ? ? 1_555 C MN  . MN ? ? A ASP 191 A MN  401 1_555 ? ? ? ? ? ? ? 2.189 ? 
metalc3  metalc ? ? A HIS 270 NE2 ? ? ? 1_555 C MN  . MN ? ? A HIS 268 A MN  401 1_555 ? ? ? ? ? ? ? 2.194 ? 
metalc4  metalc ? ? B HIS 191 NE2 ? ? ? 1_555 F MN  . MN ? ? B HIS 189 B MN  401 1_555 ? ? ? ? ? ? ? 2.273 ? 
metalc5  metalc ? ? B ASP 193 OD1 ? ? ? 1_555 F MN  . MN ? ? B ASP 191 B MN  401 1_555 ? ? ? ? ? ? ? 2.134 ? 
metalc6  metalc ? ? B HIS 270 NE2 ? ? ? 1_555 F MN  . MN ? ? B HIS 268 B MN  401 1_555 ? ? ? ? ? ? ? 2.189 ? 
metalc7  metalc ? ? C MN  .   MN  ? ? ? 1_555 I HOH . O  ? ? A MN  401 A HOH 508 1_555 ? ? ? ? ? ? ? 2.323 ? 
metalc8  metalc ? ? C MN  .   MN  ? ? ? 1_555 D AKG . O2 A ? A MN  401 A AKG 402 1_555 ? ? ? ? ? ? ? 2.052 ? 
metalc9  metalc ? ? C MN  .   MN  ? ? ? 1_555 E AKG . O4 B ? A MN  401 A AKG 403 1_555 ? ? ? ? ? ? ? 2.383 ? 
metalc10 metalc ? ? C MN  .   MN  ? ? ? 1_555 I HOH . O  ? ? A MN  401 A HOH 531 1_555 ? ? ? ? ? ? ? 2.258 ? 
metalc11 metalc ? ? F MN  .   MN  ? ? ? 1_555 J HOH . O  ? ? B MN  401 B HOH 519 1_555 ? ? ? ? ? ? ? 2.205 ? 
metalc12 metalc ? ? F MN  .   MN  ? ? ? 1_555 J HOH . O  ? ? B MN  401 B HOH 521 1_555 ? ? ? ? ? ? ? 2.258 ? 
metalc13 metalc ? ? F MN  .   MN  ? ? ? 1_555 G AKG . O4 A ? B MN  401 B AKG 402 1_555 ? ? ? ? ? ? ? 2.295 ? 
metalc14 metalc ? ? F MN  .   MN  ? ? ? 1_555 H AKG . O2 B ? B MN  401 B AKG 403 1_555 ? ? ? ? ? ? ? 2.125 ? 
# 
_struct_conn_type.id          metalc 
_struct_conn_type.criteria    ? 
_struct_conn_type.reference   ? 
# 
loop_
_struct_mon_prot_cis.pdbx_id 
_struct_mon_prot_cis.label_comp_id 
_struct_mon_prot_cis.label_seq_id 
_struct_mon_prot_cis.label_asym_id 
_struct_mon_prot_cis.label_alt_id 
_struct_mon_prot_cis.pdbx_PDB_ins_code 
_struct_mon_prot_cis.auth_comp_id 
_struct_mon_prot_cis.auth_seq_id 
_struct_mon_prot_cis.auth_asym_id 
_struct_mon_prot_cis.pdbx_label_comp_id_2 
_struct_mon_prot_cis.pdbx_label_seq_id_2 
_struct_mon_prot_cis.pdbx_label_asym_id_2 
_struct_mon_prot_cis.pdbx_PDB_ins_code_2 
_struct_mon_prot_cis.pdbx_auth_comp_id_2 
_struct_mon_prot_cis.pdbx_auth_seq_id_2 
_struct_mon_prot_cis.pdbx_auth_asym_id_2 
_struct_mon_prot_cis.pdbx_PDB_model_num 
_struct_mon_prot_cis.pdbx_omega_angle 
1 GLU 237 A . ? GLU 235 A PRO 238 A ? PRO 236 A 1 -0.10 
2 GLU 237 B . ? GLU 235 B PRO 238 B ? PRO 236 B 1 -0.23 
# 
loop_
_struct_sheet.id 
_struct_sheet.type 
_struct_sheet.number_strands 
_struct_sheet.details 
AA1 ? 8 ? 
AA2 ? 2 ? 
AA3 ? 4 ? 
AA4 ? 2 ? 
AA5 ? 8 ? 
AA6 ? 2 ? 
AA7 ? 4 ? 
AA8 ? 2 ? 
# 
loop_
_struct_sheet_order.sheet_id 
_struct_sheet_order.range_id_1 
_struct_sheet_order.range_id_2 
_struct_sheet_order.offset 
_struct_sheet_order.sense 
AA1 1 2 ? parallel      
AA1 2 3 ? anti-parallel 
AA1 3 4 ? anti-parallel 
AA1 4 5 ? anti-parallel 
AA1 5 6 ? anti-parallel 
AA1 6 7 ? anti-parallel 
AA1 7 8 ? anti-parallel 
AA2 1 2 ? anti-parallel 
AA3 1 2 ? anti-parallel 
AA3 2 3 ? anti-parallel 
AA3 3 4 ? anti-parallel 
AA4 1 2 ? anti-parallel 
AA5 1 2 ? parallel      
AA5 2 3 ? anti-parallel 
AA5 3 4 ? anti-parallel 
AA5 4 5 ? anti-parallel 
AA5 5 6 ? anti-parallel 
AA5 6 7 ? anti-parallel 
AA5 7 8 ? anti-parallel 
AA6 1 2 ? anti-parallel 
AA7 1 2 ? anti-parallel 
AA7 2 3 ? anti-parallel 
AA7 3 4 ? anti-parallel 
AA8 1 2 ? anti-parallel 
# 
loop_
_struct_sheet_range.sheet_id 
_struct_sheet_range.id 
_struct_sheet_range.beg_label_comp_id 
_struct_sheet_range.beg_label_asym_id 
_struct_sheet_range.beg_label_seq_id 
_struct_sheet_range.pdbx_beg_PDB_ins_code 
_struct_sheet_range.end_label_comp_id 
_struct_sheet_range.end_label_asym_id 
_struct_sheet_range.end_label_seq_id 
_struct_sheet_range.pdbx_end_PDB_ins_code 
_struct_sheet_range.beg_auth_comp_id 
_struct_sheet_range.beg_auth_asym_id 
_struct_sheet_range.beg_auth_seq_id 
_struct_sheet_range.end_auth_comp_id 
_struct_sheet_range.end_auth_asym_id 
_struct_sheet_range.end_auth_seq_id 
AA1 1 THR A 8   ? PHE A 9   ? THR A 6   PHE A 7   
AA1 2 PHE A 38  ? LYS A 41  ? PHE A 36  LYS A 39  
AA1 3 VAL A 248 ? PRO A 253 ? VAL A 246 PRO A 251 
AA1 4 LEU A 197 ? GLN A 202 ? LEU A 195 GLN A 200 
AA1 5 ARG A 279 ? HIS A 286 ? ARG A 277 HIS A 284 
AA1 6 HIS A 171 ? PHE A 177 ? HIS A 169 PHE A 175 
AA1 7 GLU A 96  ? VAL A 100 ? GLU A 94  VAL A 98  
AA1 8 GLY A 79  ? VAL A 81  ? GLY A 77  VAL A 79  
AA2 1 VAL A 87  ? THR A 88  ? VAL A 85  THR A 86  
AA2 2 LYS A 91  ? PRO A 92  ? LYS A 89  PRO A 90  
AA3 1 ARG A 186 ? HIS A 191 ? ARG A 184 HIS A 189 
AA3 2 HIS A 270 ? LYS A 273 ? HIS A 268 LYS A 271 
AA3 3 LEU A 208 ? ILE A 210 ? LEU A 206 ILE A 208 
AA3 4 THR A 240 ? PHE A 241 ? THR A 238 PHE A 239 
AA4 1 SER A 293 ? ALA A 294 ? SER A 291 ALA A 292 
AA4 2 ILE A 306 ? HIS A 307 ? ILE A 304 HIS A 305 
AA5 1 THR B 8   ? PHE B 9   ? THR B 6   PHE B 7   
AA5 2 PHE B 38  ? LYS B 41  ? PHE B 36  LYS B 39  
AA5 3 VAL B 248 ? PRO B 253 ? VAL B 246 PRO B 251 
AA5 4 LEU B 197 ? GLN B 202 ? LEU B 195 GLN B 200 
AA5 5 ARG B 279 ? HIS B 286 ? ARG B 277 HIS B 284 
AA5 6 HIS B 171 ? PHE B 177 ? HIS B 169 PHE B 175 
AA5 7 GLU B 96  ? VAL B 100 ? GLU B 94  VAL B 98  
AA5 8 GLY B 79  ? VAL B 81  ? GLY B 77  VAL B 79  
AA6 1 VAL B 87  ? THR B 88  ? VAL B 85  THR B 86  
AA6 2 LYS B 91  ? PRO B 92  ? LYS B 89  PRO B 90  
AA7 1 ARG B 186 ? HIS B 191 ? ARG B 184 HIS B 189 
AA7 2 HIS B 270 ? LYS B 273 ? HIS B 268 LYS B 271 
AA7 3 LEU B 208 ? ILE B 210 ? LEU B 206 ILE B 208 
AA7 4 THR B 240 ? PHE B 241 ? THR B 238 PHE B 239 
AA8 1 SER B 293 ? ALA B 294 ? SER B 291 ALA B 292 
AA8 2 ILE B 306 ? HIS B 307 ? ILE B 304 HIS B 305 
# 
loop_
_pdbx_struct_sheet_hbond.sheet_id 
_pdbx_struct_sheet_hbond.range_id_1 
_pdbx_struct_sheet_hbond.range_id_2 
_pdbx_struct_sheet_hbond.range_1_label_atom_id 
_pdbx_struct_sheet_hbond.range_1_label_comp_id 
_pdbx_struct_sheet_hbond.range_1_label_asym_id 
_pdbx_struct_sheet_hbond.range_1_label_seq_id 
_pdbx_struct_sheet_hbond.range_1_PDB_ins_code 
_pdbx_struct_sheet_hbond.range_1_auth_atom_id 
_pdbx_struct_sheet_hbond.range_1_auth_comp_id 
_pdbx_struct_sheet_hbond.range_1_auth_asym_id 
_pdbx_struct_sheet_hbond.range_1_auth_seq_id 
_pdbx_struct_sheet_hbond.range_2_label_atom_id 
_pdbx_struct_sheet_hbond.range_2_label_comp_id 
_pdbx_struct_sheet_hbond.range_2_label_asym_id 
_pdbx_struct_sheet_hbond.range_2_label_seq_id 
_pdbx_struct_sheet_hbond.range_2_PDB_ins_code 
_pdbx_struct_sheet_hbond.range_2_auth_atom_id 
_pdbx_struct_sheet_hbond.range_2_auth_comp_id 
_pdbx_struct_sheet_hbond.range_2_auth_asym_id 
_pdbx_struct_sheet_hbond.range_2_auth_seq_id 
AA1 1 2 N PHE A 9   ? N PHE A 7   O LYS A 41  ? O LYS A 39  
AA1 2 3 N ILE A 40  ? N ILE A 38  O TRP A 249 ? O TRP A 247 
AA1 3 4 O PHE A 252 ? O PHE A 250 N VAL A 198 ? N VAL A 196 
AA1 4 5 N ILE A 199 ? N ILE A 197 O TYR A 284 ? O TYR A 282 
AA1 5 6 O PHE A 285 ? O PHE A 283 N HIS A 171 ? N HIS A 169 
AA1 6 7 O VAL A 174 ? O VAL A 172 N PHE A 98  ? N PHE A 96  
AA1 7 8 O ILE A 97  ? O ILE A 95  N VAL A 81  ? N VAL A 79  
AA2 1 2 N THR A 88  ? N THR A 86  O LYS A 91  ? O LYS A 89  
AA3 1 2 N HIS A 191 ? N HIS A 189 O HIS A 270 ? O HIS A 268 
AA3 2 3 O LYS A 271 ? O LYS A 269 N TYR A 209 ? N TYR A 207 
AA3 3 4 N ILE A 210 ? N ILE A 208 O THR A 240 ? O THR A 238 
AA4 1 2 N ALA A 294 ? N ALA A 292 O ILE A 306 ? O ILE A 304 
AA5 1 2 N PHE B 9   ? N PHE B 7   O LYS B 41  ? O LYS B 39  
AA5 2 3 N ILE B 40  ? N ILE B 38  O TRP B 249 ? O TRP B 247 
AA5 3 4 O THR B 250 ? O THR B 248 N ALA B 200 ? N ALA B 198 
AA5 4 5 N ILE B 199 ? N ILE B 197 O TYR B 284 ? O TYR B 282 
AA5 5 6 O PHE B 285 ? O PHE B 283 N HIS B 171 ? N HIS B 169 
AA5 6 7 O MET B 172 ? O MET B 170 N VAL B 100 ? N VAL B 98  
AA5 7 8 O ILE B 97  ? O ILE B 95  N VAL B 81  ? N VAL B 79  
AA6 1 2 N THR B 88  ? N THR B 86  O LYS B 91  ? O LYS B 89  
AA7 1 2 N HIS B 191 ? N HIS B 189 O HIS B 270 ? O HIS B 268 
AA7 2 3 O LYS B 271 ? O LYS B 269 N TYR B 209 ? N TYR B 207 
AA7 3 4 N ILE B 210 ? N ILE B 208 O THR B 240 ? O THR B 238 
AA8 1 2 N ALA B 294 ? N ALA B 292 O ILE B 306 ? O ILE B 304 
# 
loop_
_struct_site.id 
_struct_site.pdbx_evidence_code 
_struct_site.pdbx_auth_asym_id 
_struct_site.pdbx_auth_comp_id 
_struct_site.pdbx_auth_seq_id 
_struct_site.pdbx_auth_ins_code 
_struct_site.pdbx_num_residues 
_struct_site.details 
AC1 Software A MN  401 ? 7  'binding site for residue MN A 401'  
AC2 Software A AKG 402 ? 14 'binding site for residue AKG A 402' 
AC3 Software A AKG 403 ? 13 'binding site for residue AKG A 403' 
AC4 Software B MN  401 ? 7  'binding site for residue MN B 401'  
AC5 Software B AKG 402 ? 12 'binding site for residue AKG B 402' 
AC6 Software B AKG 403 ? 13 'binding site for residue AKG B 403' 
# 
loop_
_struct_site_gen.id 
_struct_site_gen.site_id 
_struct_site_gen.pdbx_num_res 
_struct_site_gen.label_comp_id 
_struct_site_gen.label_asym_id 
_struct_site_gen.label_seq_id 
_struct_site_gen.pdbx_auth_ins_code 
_struct_site_gen.auth_comp_id 
_struct_site_gen.auth_asym_id 
_struct_site_gen.auth_seq_id 
_struct_site_gen.label_atom_id 
_struct_site_gen.label_alt_id 
_struct_site_gen.symmetry 
_struct_site_gen.details 
1  AC1 7  HIS A 191 ? HIS A 189 . ? 1_555 ? 
2  AC1 7  ASP A 193 ? ASP A 191 . ? 1_555 ? 
3  AC1 7  HIS A 270 ? HIS A 268 . ? 1_555 ? 
4  AC1 7  AKG D .   ? AKG A 402 . ? 1_555 ? 
5  AC1 7  AKG E .   ? AKG A 403 . ? 1_555 ? 
6  AC1 7  HOH I .   ? HOH A 508 . ? 1_555 ? 
7  AC1 7  HOH I .   ? HOH A 531 . ? 1_555 ? 
8  AC2 14 ARG A 173 ? ARG A 171 . ? 1_555 ? 
9  AC2 14 PHE A 177 ? PHE A 175 . ? 1_555 ? 
10 AC2 14 ILE A 188 ? ILE A 186 . ? 1_555 ? 
11 AC2 14 HIS A 191 ? HIS A 189 . ? 1_555 ? 
12 AC2 14 LEU A 208 ? LEU A 206 . ? 1_555 ? 
13 AC2 14 HIS A 270 ? HIS A 268 . ? 1_555 ? 
14 AC2 14 VAL A 272 ? VAL A 270 . ? 1_555 ? 
15 AC2 14 ARG A 279 ? ARG A 277 . ? 1_555 ? 
16 AC2 14 ALA A 281 ? ALA A 279 . ? 1_555 ? 
17 AC2 14 MN  C .   ? MN  A 401 . ? 1_555 ? 
18 AC2 14 AKG E .   ? AKG A 403 . ? 1_555 ? 
19 AC2 14 HOH I .   ? HOH A 508 . ? 1_555 ? 
20 AC2 14 HOH I .   ? HOH A 526 . ? 1_555 ? 
21 AC2 14 HOH I .   ? HOH A 531 . ? 1_555 ? 
22 AC3 13 ARG A 173 ? ARG A 171 . ? 1_555 ? 
23 AC3 13 LEU A 175 ? LEU A 173 . ? 1_555 ? 
24 AC3 13 PHE A 177 ? PHE A 175 . ? 1_555 ? 
25 AC3 13 HIS A 191 ? HIS A 189 . ? 1_555 ? 
26 AC3 13 HIS A 270 ? HIS A 268 . ? 1_555 ? 
27 AC3 13 VAL A 272 ? VAL A 270 . ? 1_555 ? 
28 AC3 13 ARG A 279 ? ARG A 277 . ? 1_555 ? 
29 AC3 13 ALA A 281 ? ALA A 279 . ? 1_555 ? 
30 AC3 13 MN  C .   ? MN  A 401 . ? 1_555 ? 
31 AC3 13 AKG D .   ? AKG A 402 . ? 1_555 ? 
32 AC3 13 HOH I .   ? HOH A 526 . ? 1_555 ? 
33 AC3 13 HOH I .   ? HOH A 531 . ? 1_555 ? 
34 AC3 13 HOH I .   ? HOH A 540 . ? 1_555 ? 
35 AC4 7  HIS B 191 ? HIS B 189 . ? 1_555 ? 
36 AC4 7  ASP B 193 ? ASP B 191 . ? 1_555 ? 
37 AC4 7  HIS B 270 ? HIS B 268 . ? 1_555 ? 
38 AC4 7  AKG G .   ? AKG B 402 . ? 1_555 ? 
39 AC4 7  AKG H .   ? AKG B 403 . ? 1_555 ? 
40 AC4 7  HOH J .   ? HOH B 519 . ? 1_555 ? 
41 AC4 7  HOH J .   ? HOH B 521 . ? 1_555 ? 
42 AC5 12 ARG B 173 ? ARG B 171 . ? 1_555 ? 
43 AC5 12 LEU B 175 ? LEU B 173 . ? 1_555 ? 
44 AC5 12 PHE B 177 ? PHE B 175 . ? 1_555 ? 
45 AC5 12 ILE B 188 ? ILE B 186 . ? 1_555 ? 
46 AC5 12 HIS B 191 ? HIS B 189 . ? 1_555 ? 
47 AC5 12 LEU B 208 ? LEU B 206 . ? 1_555 ? 
48 AC5 12 HIS B 270 ? HIS B 268 . ? 1_555 ? 
49 AC5 12 VAL B 272 ? VAL B 270 . ? 1_555 ? 
50 AC5 12 ARG B 279 ? ARG B 277 . ? 1_555 ? 
51 AC5 12 MN  F .   ? MN  B 401 . ? 1_555 ? 
52 AC5 12 AKG H .   ? AKG B 403 . ? 1_555 ? 
53 AC5 12 HOH J .   ? HOH B 519 . ? 1_555 ? 
54 AC6 13 ARG B 173 ? ARG B 171 . ? 1_555 ? 
55 AC6 13 PHE B 177 ? PHE B 175 . ? 1_555 ? 
56 AC6 13 ILE B 188 ? ILE B 186 . ? 1_555 ? 
57 AC6 13 HIS B 191 ? HIS B 189 . ? 1_555 ? 
58 AC6 13 HIS B 270 ? HIS B 268 . ? 1_555 ? 
59 AC6 13 VAL B 272 ? VAL B 270 . ? 1_555 ? 
60 AC6 13 ARG B 279 ? ARG B 277 . ? 1_555 ? 
61 AC6 13 ALA B 281 ? ALA B 279 . ? 1_555 ? 
62 AC6 13 MN  F .   ? MN  B 401 . ? 1_555 ? 
63 AC6 13 AKG G .   ? AKG B 402 . ? 1_555 ? 
64 AC6 13 HOH J .   ? HOH B 501 . ? 1_555 ? 
65 AC6 13 HOH J .   ? HOH B 519 . ? 1_555 ? 
66 AC6 13 HOH J .   ? HOH B 521 . ? 1_555 ? 
# 
_atom_sites.entry_id                    5V2X 
_atom_sites.fract_transf_matrix[1][1]   0.013439 
_atom_sites.fract_transf_matrix[1][2]   0.000000 
_atom_sites.fract_transf_matrix[1][3]   0.000000 
_atom_sites.fract_transf_matrix[2][1]   0.000000 
_atom_sites.fract_transf_matrix[2][2]   0.010252 
_atom_sites.fract_transf_matrix[2][3]   0.000000 
_atom_sites.fract_transf_matrix[3][1]   0.000000 
_atom_sites.fract_transf_matrix[3][2]   0.000000 
_atom_sites.fract_transf_matrix[3][3]   0.009767 
_atom_sites.fract_transf_vector[1]      0.000000 
_atom_sites.fract_transf_vector[2]      0.000000 
_atom_sites.fract_transf_vector[3]      0.000000 
# 
loop_
_atom_type.symbol 
C  
MN 
N  
O  
S  
# 
loop_
_atom_site.group_PDB 
_atom_site.id 
_atom_site.type_symbol 
_atom_site.label_atom_id 
_atom_site.label_alt_id 
_atom_site.label_comp_id 
_atom_site.label_asym_id 
_atom_site.label_entity_id 
_atom_site.label_seq_id 
_atom_site.pdbx_PDB_ins_code 
_atom_site.Cartn_x 
_atom_site.Cartn_y 
_atom_site.Cartn_z 
_atom_site.occupancy 
_atom_site.B_iso_or_equiv 
_atom_site.Cartn_x_esd 
_atom_site.Cartn_y_esd 
_atom_site.Cartn_z_esd 
_atom_site.occupancy_esd 
_atom_site.B_iso_or_equiv_esd 
_atom_site.pdbx_formal_charge 
_atom_site.auth_seq_id 
_atom_site.auth_comp_id 
_atom_site.auth_asym_id 
_atom_site.auth_atom_id 
_atom_site.pdbx_PDB_model_num 
ATOM   1    N  N   . SER A 1 1   ? -19.890 6.160   3.914   1.00 19.97 ? ? ? ? ? ? -1   SER A N   1 
ATOM   2    C  CA  . SER A 1 1   ? -19.299 5.559   5.099   1.00 21.40 ? ? ? ? ? ? -1   SER A CA  1 
ATOM   3    C  C   . SER A 1 1   ? -19.341 4.036   5.019   1.00 17.43 ? ? ? ? ? ? -1   SER A C   1 
ATOM   4    O  O   . SER A 1 1   ? -20.290 3.442   4.497   1.00 14.19 ? ? ? ? ? ? -1   SER A O   1 
ATOM   5    C  CB  . SER A 1 1   ? -20.011 6.034   6.364   1.00 30.09 ? ? ? ? ? ? -1   SER A CB  1 
ATOM   6    O  OG  . SER A 1 1   ? -21.365 5.631   6.344   1.00 34.30 ? ? ? ? ? ? -1   SER A OG  1 
ATOM   7    N  N   . HIS A 1 2   ? -18.295 3.416   5.546   1.00 15.91 ? ? ? ? ? ? 0    HIS A N   1 
ATOM   8    C  CA  . HIS A 1 2   ? -18.086 1.995   5.331   1.00 13.56 ? ? ? ? ? ? 0    HIS A CA  1 
ATOM   9    C  C   . HIS A 1 2   ? -19.160 1.166   6.018   1.00 16.86 ? ? ? ? ? ? 0    HIS A C   1 
ATOM   10   O  O   . HIS A 1 2   ? -19.524 1.421   7.169   1.00 13.45 ? ? ? ? ? ? 0    HIS A O   1 
ATOM   11   C  CB  . HIS A 1 2   ? -16.713 1.588   5.850   1.00 15.32 ? ? ? ? ? ? 0    HIS A CB  1 
ATOM   12   C  CG  . HIS A 1 2   ? -16.485 0.112   5.814   1.00 16.08 ? ? ? ? ? ? 0    HIS A CG  1 
ATOM   13   N  ND1 . HIS A 1 2   ? -16.127 -0.554  4.662   1.00 12.08 ? ? ? ? ? ? 0    HIS A ND1 1 
ATOM   14   C  CD2 . HIS A 1 2   ? -16.609 -0.833  6.778   1.00 16.40 ? ? ? ? ? ? 0    HIS A CD2 1 
ATOM   15   C  CE1 . HIS A 1 2   ? -16.013 -1.845  4.924   1.00 15.37 ? ? ? ? ? ? 0    HIS A CE1 1 
ATOM   16   N  NE2 . HIS A 1 2   ? -16.297 -2.040  6.203   1.00 13.88 ? ? ? ? ? ? 0    HIS A NE2 1 
ATOM   17   N  N   . MET A 1 3   ? -19.659 0.154   5.303   1.00 11.45 ? ? ? ? ? ? 1    MET A N   1 
ATOM   18   C  CA  . MET A 1 3   ? -20.585 -0.818  5.878   1.00 13.63 ? ? ? ? ? ? 1    MET A CA  1 
ATOM   19   C  C   . MET A 1 3   ? -20.219 -2.229  5.426   1.00 14.26 ? ? ? ? ? ? 1    MET A C   1 
ATOM   20   O  O   . MET A 1 3   ? -19.711 -3.042  6.207   1.00 14.57 ? ? ? ? ? ? 1    MET A O   1 
ATOM   21   C  CB  . MET A 1 3   ? -22.028 -0.480  5.483   1.00 15.24 ? ? ? ? ? ? 1    MET A CB  1 
ATOM   22   C  CG  . MET A 1 3   ? -23.094 -1.402  6.086   1.00 20.60 ? ? ? ? ? ? 1    MET A CG  1 
ATOM   23   S  SD  . MET A 1 3   ? -23.075 -1.520  7.890   1.00 15.85 ? ? ? ? ? ? 1    MET A SD  1 
ATOM   24   C  CE  . MET A 1 3   ? -23.299 0.206   8.366   1.00 19.13 ? ? ? ? ? ? 1    MET A CE  1 
ATOM   25   N  N   . THR A 1 4   ? -20.480 -2.522  4.158   1.00 18.46 ? ? ? ? ? ? 2    THR A N   1 
ATOM   26   C  CA  . THR A 1 4   ? -20.184 -3.822  3.579   1.00 13.72 ? ? ? ? ? ? 2    THR A CA  1 
ATOM   27   C  C   . THR A 1 4   ? -18.735 -3.891  3.108   1.00 16.27 ? ? ? ? ? ? 2    THR A C   1 
ATOM   28   O  O   . THR A 1 4   ? -18.175 -2.901  2.626   1.00 20.90 ? ? ? ? ? ? 2    THR A O   1 
ATOM   29   C  CB  . THR A 1 4   ? -21.135 -4.072  2.407   1.00 19.56 ? ? ? ? ? ? 2    THR A CB  1 
ATOM   30   O  OG1 . THR A 1 4   ? -22.429 -4.415  2.919   1.00 33.58 ? ? ? ? ? ? 2    THR A OG1 1 
ATOM   31   C  CG2 . THR A 1 4   ? -20.633 -5.191  1.514   1.00 28.83 ? ? ? ? ? ? 2    THR A CG2 1 
ATOM   32   N  N   . ASN A 1 5   ? -18.121 -5.067  3.262   1.00 13.87 ? ? ? ? ? ? 3    ASN A N   1 
ATOM   33   C  CA  . ASN A 1 5   ? -16.854 -5.384  2.617   1.00 18.70 ? ? ? ? ? ? 3    ASN A CA  1 
ATOM   34   C  C   . ASN A 1 5   ? -17.161 -6.172  1.352   1.00 19.60 ? ? ? ? ? ? 3    ASN A C   1 
ATOM   35   O  O   . ASN A 1 5   ? -17.895 -7.160  1.402   1.00 20.23 ? ? ? ? ? ? 3    ASN A O   1 
ATOM   36   C  CB  . ASN A 1 5   ? -15.948 -6.208  3.533   1.00 23.68 ? ? ? ? ? ? 3    ASN A CB  1 
ATOM   37   C  CG  . ASN A 1 5   ? -14.827 -5.391  4.132   1.00 39.81 ? ? ? ? ? ? 3    ASN A CG  1 
ATOM   38   O  OD1 . ASN A 1 5   ? -14.300 -4.477  3.496   1.00 46.86 ? ? ? ? ? ? 3    ASN A OD1 1 
ATOM   39   N  ND2 . ASN A 1 5   ? -14.455 -5.714  5.364   1.00 42.12 ? ? ? ? ? ? 3    ASN A ND2 1 
ATOM   40   N  N   . LEU A 1 6   ? -16.615 -5.735  0.226   1.00 15.74 ? ? ? ? ? ? 4    LEU A N   1 
ATOM   41   C  CA  . LEU A 1 6   ? -16.875 -6.465  -1.008  1.00 14.25 ? ? ? ? ? ? 4    LEU A CA  1 
ATOM   42   C  C   . LEU A 1 6   ? -16.017 -7.726  -1.086  1.00 11.22 ? ? ? ? ? ? 4    LEU A C   1 
ATOM   43   O  O   . LEU A 1 6   ? -14.946 -7.822  -0.478  1.00 13.12 ? ? ? ? ? ? 4    LEU A O   1 
ATOM   44   C  CB  . LEU A 1 6   ? -16.607 -5.578  -2.220  1.00 10.85 ? ? ? ? ? ? 4    LEU A CB  1 
ATOM   45   C  CG  . LEU A 1 6   ? -17.413 -4.281  -2.250  1.00 16.26 ? ? ? ? ? ? 4    LEU A CG  1 
ATOM   46   C  CD1 . LEU A 1 6   ? -17.111 -3.494  -3.519  1.00 14.02 ? ? ? ? ? ? 4    LEU A CD1 1 
ATOM   47   C  CD2 . LEU A 1 6   ? -18.893 -4.608  -2.152  1.00 16.44 ? ? ? ? ? ? 4    LEU A CD2 1 
ATOM   48   N  N   . GLN A 1 7   ? -16.497 -8.698  -1.862  1.00 8.95  ? ? ? ? ? ? 5    GLN A N   1 
ATOM   49   C  CA  . GLN A 1 7   ? -15.684 -9.871  -2.166  1.00 11.20 ? ? ? ? ? ? 5    GLN A CA  1 
ATOM   50   C  C   . GLN A 1 7   ? -14.533 -9.477  -3.081  1.00 15.72 ? ? ? ? ? ? 5    GLN A C   1 
ATOM   51   O  O   . GLN A 1 7   ? -14.679 -8.605  -3.945  1.00 11.92 ? ? ? ? ? ? 5    GLN A O   1 
ATOM   52   C  CB  . GLN A 1 7   ? -16.536 -10.963 -2.823  1.00 8.44  ? ? ? ? ? ? 5    GLN A CB  1 
ATOM   53   C  CG  . GLN A 1 7   ? -17.730 -11.372 -1.975  1.00 9.59  ? ? ? ? ? ? 5    GLN A CG  1 
ATOM   54   C  CD  . GLN A 1 7   ? -18.619 -12.392 -2.646  1.00 12.71 ? ? ? ? ? ? 5    GLN A CD  1 
ATOM   55   O  OE1 . GLN A 1 7   ? -18.137 -13.347 -3.258  1.00 13.32 ? ? ? ? ? ? 5    GLN A OE1 1 
ATOM   56   N  NE2 . GLN A 1 7   ? -19.929 -12.189 -2.547  1.00 13.43 ? ? ? ? ? ? 5    GLN A NE2 1 
ATOM   57   N  N   . THR A 1 8   ? -13.380 -10.112 -2.877  1.00 11.90 ? ? ? ? ? ? 6    THR A N   1 
ATOM   58   C  CA  . THR A 1 8   ? -12.176 -9.814  -3.641  1.00 14.60 ? ? ? ? ? ? 6    THR A CA  1 
ATOM   59   C  C   . THR A 1 8   ? -11.667 -11.090 -4.296  1.00 15.20 ? ? ? ? ? ? 6    THR A C   1 
ATOM   60   O  O   . THR A 1 8   ? -11.573 -12.139 -3.645  1.00 13.64 ? ? ? ? ? ? 6    THR A O   1 
ATOM   61   C  CB  . THR A 1 8   ? -11.085 -9.200  -2.754  1.00 16.28 ? ? ? ? ? ? 6    THR A CB  1 
ATOM   62   O  OG1 . THR A 1 8   ? -11.610 -8.057  -2.075  1.00 15.77 ? ? ? ? ? ? 6    THR A OG1 1 
ATOM   63   C  CG2 . THR A 1 8   ? -9.918  -8.736  -3.590  1.00 14.33 ? ? ? ? ? ? 6    THR A CG2 1 
ATOM   64   N  N   . PHE A 1 9   ? -11.333 -10.994 -5.579  1.00 12.61 ? ? ? ? ? ? 7    PHE A N   1 
ATOM   65   C  CA  . PHE A 1 9   ? -10.848 -12.126 -6.352  1.00 10.65 ? ? ? ? ? ? 7    PHE A CA  1 
ATOM   66   C  C   . PHE A 1 9   ? -9.512  -11.786 -6.987  1.00 13.74 ? ? ? ? ? ? 7    PHE A C   1 
ATOM   67   O  O   . PHE A 1 9   ? -9.230  -10.625 -7.293  1.00 14.79 ? ? ? ? ? ? 7    PHE A O   1 
ATOM   68   C  CB  . PHE A 1 9   ? -11.857 -12.520 -7.443  1.00 13.26 ? ? ? ? ? ? 7    PHE A CB  1 
ATOM   69   C  CG  . PHE A 1 9   ? -13.194 -12.905 -6.893  1.00 12.70 ? ? ? ? ? ? 7    PHE A CG  1 
ATOM   70   C  CD1 . PHE A 1 9   ? -13.423 -14.207 -6.455  1.00 12.82 ? ? ? ? ? ? 7    PHE A CD1 1 
ATOM   71   C  CD2 . PHE A 1 9   ? -14.209 -11.967 -6.773  1.00 11.54 ? ? ? ? ? ? 7    PHE A CD2 1 
ATOM   72   C  CE1 . PHE A 1 9   ? -14.649 -14.574 -5.921  1.00 15.27 ? ? ? ? ? ? 7    PHE A CE1 1 
ATOM   73   C  CE2 . PHE A 1 9   ? -15.439 -12.327 -6.244  1.00 14.24 ? ? ? ? ? ? 7    PHE A CE2 1 
ATOM   74   C  CZ  . PHE A 1 9   ? -15.657 -13.634 -5.812  1.00 14.42 ? ? ? ? ? ? 7    PHE A CZ  1 
ATOM   75   N  N   . GLU A 1 10  ? -8.694  -12.809 -7.191  1.00 14.20 ? ? ? ? ? ? 8    GLU A N   1 
ATOM   76   C  CA  . GLU A 1 10  ? -7.458  -12.670 -7.950  1.00 18.88 ? ? ? ? ? ? 8    GLU A CA  1 
ATOM   77   C  C   . GLU A 1 10  ? -7.620  -13.438 -9.258  1.00 14.75 ? ? ? ? ? ? 8    GLU A C   1 
ATOM   78   O  O   . GLU A 1 10  ? -7.755  -14.667 -9.257  1.00 18.58 ? ? ? ? ? ? 8    GLU A O   1 
ATOM   79   C  CB  . GLU A 1 10  ? -6.254  -13.161 -7.152  1.00 22.83 ? ? ? ? ? ? 8    GLU A CB  1 
ATOM   80   C  CG  . GLU A 1 10  ? -4.961  -13.078 -7.952  1.00 40.32 ? ? ? ? ? ? 8    GLU A CG  1 
ATOM   81   C  CD  . GLU A 1 10  ? -3.725  -13.089 -7.079  1.00 52.30 ? ? ? ? ? ? 8    GLU A CD  1 
ATOM   82   O  OE1 . GLU A 1 10  ? -2.840  -12.233 -7.296  1.00 54.42 ? ? ? ? ? ? 8    GLU A OE1 1 
ATOM   83   O  OE2 . GLU A 1 10  ? -3.646  -13.946 -6.174  1.00 52.94 ? ? ? ? ? ? 8    GLU A OE2 1 
ATOM   84   N  N   . LEU A 1 11  ? -7.616  -12.716 -10.366 1.00 14.29 ? ? ? ? ? ? 9    LEU A N   1 
ATOM   85   C  CA  . LEU A 1 11  ? -7.819  -13.355 -11.659 1.00 13.96 ? ? ? ? ? ? 9    LEU A CA  1 
ATOM   86   C  C   . LEU A 1 11  ? -6.524  -14.005 -12.143 1.00 14.20 ? ? ? ? ? ? 9    LEU A C   1 
ATOM   87   O  O   . LEU A 1 11  ? -5.453  -13.405 -12.038 1.00 12.94 ? ? ? ? ? ? 9    LEU A O   1 
ATOM   88   C  CB  . LEU A 1 11  ? -8.292  -12.329 -12.696 1.00 16.09 ? ? ? ? ? ? 9    LEU A CB  1 
ATOM   89   C  CG  . LEU A 1 11  ? -9.573  -11.542 -12.390 1.00 15.02 ? ? ? ? ? ? 9    LEU A CG  1 
ATOM   90   C  CD1 . LEU A 1 11  ? -9.979  -10.653 -13.568 1.00 15.39 ? ? ? ? ? ? 9    LEU A CD1 1 
ATOM   91   C  CD2 . LEU A 1 11  ? -10.715 -12.487 -12.016 1.00 16.55 ? ? ? ? ? ? 9    LEU A CD2 1 
ATOM   92   N  N   . PRO A 1 12  ? -6.601  -15.214 -12.703 1.00 15.72 ? ? ? ? ? ? 10   PRO A N   1 
ATOM   93   C  CA  . PRO A 1 12  ? -5.439  -15.770 -13.402 1.00 17.22 ? ? ? ? ? ? 10   PRO A CA  1 
ATOM   94   C  C   . PRO A 1 12  ? -5.080  -14.900 -14.599 1.00 16.25 ? ? ? ? ? ? 10   PRO A C   1 
ATOM   95   O  O   . PRO A 1 12  ? -5.946  -14.292 -15.232 1.00 15.29 ? ? ? ? ? ? 10   PRO A O   1 
ATOM   96   C  CB  . PRO A 1 12  ? -5.921  -17.155 -13.842 1.00 13.23 ? ? ? ? ? ? 10   PRO A CB  1 
ATOM   97   C  CG  . PRO A 1 12  ? -7.400  -16.969 -14.045 1.00 14.67 ? ? ? ? ? ? 10   PRO A CG  1 
ATOM   98   C  CD  . PRO A 1 12  ? -7.819  -16.008 -12.940 1.00 12.77 ? ? ? ? ? ? 10   PRO A CD  1 
ATOM   99   N  N   . THR A 1 13  ? -3.781  -14.830 -14.895 1.00 14.04 ? ? ? ? ? ? 11   THR A N   1 
ATOM   100  C  CA  . THR A 1 13  ? -3.331  -14.040 -16.037 1.00 15.26 ? ? ? ? ? ? 11   THR A CA  1 
ATOM   101  C  C   . THR A 1 13  ? -3.961  -14.536 -17.332 1.00 14.92 ? ? ? ? ? ? 11   THR A C   1 
ATOM   102  O  O   . THR A 1 13  ? -4.405  -13.733 -18.159 1.00 17.66 ? ? ? ? ? ? 11   THR A O   1 
ATOM   103  C  CB  . THR A 1 13  ? -1.807  -14.073 -16.146 1.00 17.82 ? ? ? ? ? ? 11   THR A CB  1 
ATOM   104  O  OG1 . THR A 1 13  ? -1.226  -13.603 -14.924 1.00 22.04 ? ? ? ? ? ? 11   THR A OG1 1 
ATOM   105  C  CG2 . THR A 1 13  ? -1.342  -13.185 -17.305 1.00 20.30 ? ? ? ? ? ? 11   THR A CG2 1 
ATOM   106  N  N   . GLU A 1 14  ? -4.014  -15.856 -17.523 1.00 17.17 ? ? ? ? ? ? 12   GLU A N   1 
ATOM   107  C  CA  . GLU A 1 14  ? -4.711  -16.448 -18.659 1.00 17.42 ? ? ? ? ? ? 12   GLU A CA  1 
ATOM   108  C  C   . GLU A 1 14  ? -5.831  -17.354 -18.167 1.00 13.46 ? ? ? ? ? ? 12   GLU A C   1 
ATOM   109  O  O   . GLU A 1 14  ? -5.686  -18.049 -17.158 1.00 18.46 ? ? ? ? ? ? 12   GLU A O   1 
ATOM   110  C  CB  . GLU A 1 14  ? -3.756  -17.240 -19.558 1.00 23.91 ? ? ? ? ? ? 12   GLU A CB  1 
ATOM   111  C  CG  . GLU A 1 14  ? -2.626  -16.398 -20.117 1.00 21.87 ? ? ? ? ? ? 12   GLU A CG  1 
ATOM   112  C  CD  . GLU A 1 14  ? -3.062  -15.561 -21.309 1.00 36.12 ? ? ? ? ? ? 12   GLU A CD  1 
ATOM   113  O  OE1 . GLU A 1 14  ? -2.297  -14.660 -21.712 1.00 41.23 ? ? ? ? ? ? 12   GLU A OE1 1 
ATOM   114  O  OE2 . GLU A 1 14  ? -4.165  -15.804 -21.846 1.00 37.35 ? ? ? ? ? ? 12   GLU A OE2 1 
ATOM   115  N  N   . VAL A 1 15  ? -6.951  -17.328 -18.880 1.00 15.26 ? ? ? ? ? ? 13   VAL A N   1 
ATOM   116  C  CA  . VAL A 1 15  ? -8.115  -18.152 -18.575 1.00 16.22 ? ? ? ? ? ? 13   VAL A CA  1 
ATOM   117  C  C   . VAL A 1 15  ? -8.186  -19.248 -19.632 1.00 17.45 ? ? ? ? ? ? 13   VAL A C   1 
ATOM   118  O  O   . VAL A 1 15  ? -8.324  -18.954 -20.823 1.00 12.68 ? ? ? ? ? ? 13   VAL A O   1 
ATOM   119  C  CB  . VAL A 1 15  ? -9.403  -17.319 -18.567 1.00 13.26 ? ? ? ? ? ? 13   VAL A CB  1 
ATOM   120  C  CG1 . VAL A 1 15  ? -10.613 -18.213 -18.338 1.00 12.38 ? ? ? ? ? ? 13   VAL A CG1 1 
ATOM   121  C  CG2 . VAL A 1 15  ? -9.328  -16.204 -17.521 1.00 11.38 ? ? ? ? ? ? 13   VAL A CG2 1 
ATOM   122  N  N   . THR A 1 16  ? -8.105  -20.509 -19.205 1.00 14.10 ? ? ? ? ? ? 14   THR A N   1 
ATOM   123  C  CA  . THR A 1 16  ? -8.041  -21.621 -20.145 1.00 17.87 ? ? ? ? ? ? 14   THR A CA  1 
ATOM   124  C  C   . THR A 1 16  ? -9.313  -22.451 -20.220 1.00 21.87 ? ? ? ? ? ? 14   THR A C   1 
ATOM   125  O  O   . THR A 1 16  ? -9.506  -23.169 -21.205 1.00 17.97 ? ? ? ? ? ? 14   THR A O   1 
ATOM   126  C  CB  . THR A 1 16  ? -6.870  -22.548 -19.788 1.00 22.30 ? ? ? ? ? ? 14   THR A CB  1 
ATOM   127  O  OG1 . THR A 1 16  ? -7.134  -23.206 -18.541 1.00 19.83 ? ? ? ? ? ? 14   THR A OG1 1 
ATOM   128  C  CG2 . THR A 1 16  ? -5.582  -21.741 -19.661 1.00 23.36 ? ? ? ? ? ? 14   THR A CG2 1 
ATOM   129  N  N   . GLY A 1 17  ? -10.188 -22.368 -19.231 1.00 12.32 ? ? ? ? ? ? 15   GLY A N   1 
ATOM   130  C  CA  . GLY A 1 17  ? -11.372 -23.200 -19.219 1.00 14.35 ? ? ? ? ? ? 15   GLY A CA  1 
ATOM   131  C  C   . GLY A 1 17  ? -11.270 -24.421 -18.331 1.00 12.20 ? ? ? ? ? ? 15   GLY A C   1 
ATOM   132  O  O   . GLY A 1 17  ? -12.164 -25.273 -18.371 1.00 15.93 ? ? ? ? ? ? 15   GLY A O   1 
ATOM   133  N  N   . CYS A 1 18  ? -10.207 -24.539 -17.547 1.00 12.68 ? ? ? ? ? ? 16   CYS A N   1 
ATOM   134  C  CA  . CYS A 1 18  ? -10.107 -25.633 -16.598 1.00 15.71 ? ? ? ? ? ? 16   CYS A CA  1 
ATOM   135  C  C   . CYS A 1 18  ? -11.199 -25.502 -15.531 1.00 16.90 ? ? ? ? ? ? 16   CYS A C   1 
ATOM   136  O  O   . CYS A 1 18  ? -11.879 -24.475 -15.410 1.00 14.01 ? ? ? ? ? ? 16   CYS A O   1 
ATOM   137  C  CB  . CYS A 1 18  ? -8.713  -25.672 -15.974 1.00 16.31 ? ? ? ? ? ? 16   CYS A CB  1 
ATOM   138  S  SG  . CYS A 1 18  ? -8.300  -24.265 -14.919 1.00 26.83 ? ? ? ? ? ? 16   CYS A SG  1 
ATOM   139  N  N   . ALA A 1 19  ? -11.387 -26.580 -14.766 1.00 15.00 ? ? ? ? ? ? 17   ALA A N   1 
ATOM   140  C  CA  . ALA A 1 19  ? -12.508 -26.617 -13.838 1.00 17.04 ? ? ? ? ? ? 17   ALA A CA  1 
ATOM   141  C  C   . ALA A 1 19  ? -12.389 -25.533 -12.772 1.00 20.05 ? ? ? ? ? ? 17   ALA A C   1 
ATOM   142  O  O   . ALA A 1 19  ? -13.406 -25.035 -12.282 1.00 13.71 ? ? ? ? ? ? 17   ALA A O   1 
ATOM   143  C  CB  . ALA A 1 19  ? -12.623 -28.007 -13.199 1.00 13.72 ? ? ? ? ? ? 17   ALA A CB  1 
ATOM   144  N  N   . ALA A 1 20  ? -11.163 -25.147 -12.412 1.00 13.14 ? ? ? ? ? ? 18   ALA A N   1 
ATOM   145  C  CA  . ALA A 1 20  ? -10.986 -24.073 -11.439 1.00 16.53 ? ? ? ? ? ? 18   ALA A CA  1 
ATOM   146  C  C   . ALA A 1 20  ? -11.387 -22.719 -12.027 1.00 16.56 ? ? ? ? ? ? 18   ALA A C   1 
ATOM   147  O  O   . ALA A 1 20  ? -11.957 -21.875 -11.324 1.00 15.63 ? ? ? ? ? ? 18   ALA A O   1 
ATOM   148  C  CB  . ALA A 1 20  ? -9.538  -24.048 -10.947 1.00 17.14 ? ? ? ? ? ? 18   ALA A CB  1 
ATOM   149  N  N   . ASP A 1 21  ? -11.095 -22.492 -13.315 1.00 15.71 ? ? ? ? ? ? 19   ASP A N   1 
ATOM   150  C  CA  . ASP A 1 21  ? -11.593 -21.292 -13.989 1.00 12.40 ? ? ? ? ? ? 19   ASP A CA  1 
ATOM   151  C  C   . ASP A 1 21  ? -13.112 -21.233 -13.941 1.00 12.90 ? ? ? ? ? ? 19   ASP A C   1 
ATOM   152  O  O   . ASP A 1 21  ? -13.696 -20.166 -13.709 1.00 13.48 ? ? ? ? ? ? 19   ASP A O   1 
ATOM   153  C  CB  . ASP A 1 21  ? -11.151 -21.259 -15.456 1.00 13.78 ? ? ? ? ? ? 19   ASP A CB  1 
ATOM   154  C  CG  . ASP A 1 21  ? -9.686  -20.928 -15.643 1.00 19.25 ? ? ? ? ? ? 19   ASP A CG  1 
ATOM   155  O  OD1 . ASP A 1 21  ? -9.015  -20.456 -14.693 1.00 16.94 ? ? ? ? ? ? 19   ASP A OD1 1 
ATOM   156  O  OD2 . ASP A 1 21  ? -9.207  -21.129 -16.781 1.00 14.71 ? ? ? ? ? ? 19   ASP A OD2 1 
ATOM   157  N  N   . ILE A 1 22  ? -13.774 -22.371 -14.177 1.00 12.52 ? ? ? ? ? ? 20   ILE A N   1 
ATOM   158  C  CA  . ILE A 1 22  ? -15.233 -22.385 -14.199 1.00 12.06 ? ? ? ? ? ? 20   ILE A CA  1 
ATOM   159  C  C   . ILE A 1 22  ? -15.784 -22.071 -12.811 1.00 14.31 ? ? ? ? ? ? 20   ILE A C   1 
ATOM   160  O  O   . ILE A 1 22  ? -16.722 -21.275 -12.654 1.00 14.16 ? ? ? ? ? ? 20   ILE A O   1 
ATOM   161  C  CB  . ILE A 1 22  ? -15.746 -23.737 -14.720 1.00 11.47 ? ? ? ? ? ? 20   ILE A CB  1 
ATOM   162  C  CG1 . ILE A 1 22  ? -15.354 -23.913 -16.195 1.00 12.89 ? ? ? ? ? ? 20   ILE A CG1 1 
ATOM   163  C  CG2 . ILE A 1 22  ? -17.256 -23.813 -14.579 1.00 10.69 ? ? ? ? ? ? 20   ILE A CG2 1 
ATOM   164  C  CD1 . ILE A 1 22  ? -15.576 -25.339 -16.714 1.00 14.80 ? ? ? ? ? ? 20   ILE A CD1 1 
ATOM   165  N  N   . SER A 1 23  ? -15.195 -22.685 -11.783 1.00 11.79 ? ? ? ? ? ? 21   SER A N   1 
ATOM   166  C  CA  . SER A 1 23  ? -15.605 -22.402 -10.411 1.00 12.45 ? ? ? ? ? ? 21   SER A CA  1 
ATOM   167  C  C   . SER A 1 23  ? -15.432 -20.923 -10.074 1.00 13.65 ? ? ? ? ? ? 21   SER A C   1 
ATOM   168  O  O   . SER A 1 23  ? -16.314 -20.317 -9.452  1.00 12.48 ? ? ? ? ? ? 21   SER A O   1 
ATOM   169  C  CB  . SER A 1 23  ? -14.808 -23.270 -9.438  1.00 13.10 ? ? ? ? ? ? 21   SER A CB  1 
ATOM   170  O  OG  . SER A 1 23  ? -15.160 -22.957 -8.109  1.00 21.54 ? ? ? ? ? ? 21   SER A OG  1 
ATOM   171  N  N   . LEU A 1 24  ? -14.299 -20.329 -10.466 1.00 12.62 ? ? ? ? ? ? 22   LEU A N   1 
ATOM   172  C  CA  . LEU A 1 24  ? -14.088 -18.900 -10.236 1.00 14.81 ? ? ? ? ? ? 22   LEU A CA  1 
ATOM   173  C  C   . LEU A 1 24  ? -15.140 -18.071 -10.968 1.00 11.60 ? ? ? ? ? ? 22   LEU A C   1 
ATOM   174  O  O   . LEU A 1 24  ? -15.720 -17.139 -10.398 1.00 10.79 ? ? ? ? ? ? 22   LEU A O   1 
ATOM   175  C  CB  . LEU A 1 24  ? -12.675 -18.493 -10.670 1.00 13.55 ? ? ? ? ? ? 22   LEU A CB  1 
ATOM   176  C  CG  . LEU A 1 24  ? -12.324 -16.992 -10.697 1.00 11.33 ? ? ? ? ? ? 22   LEU A CG  1 
ATOM   177  C  CD1 . LEU A 1 24  ? -12.531 -16.340 -9.322  1.00 10.66 ? ? ? ? ? ? 22   LEU A CD1 1 
ATOM   178  C  CD2 . LEU A 1 24  ? -10.892 -16.777 -11.155 1.00 13.84 ? ? ? ? ? ? 22   LEU A CD2 1 
ATOM   179  N  N   . GLY A 1 25  ? -15.399 -18.399 -12.236 1.00 11.68 ? ? ? ? ? ? 23   GLY A N   1 
ATOM   180  C  CA  . GLY A 1 25  ? -16.447 -17.713 -12.973 1.00 10.35 ? ? ? ? ? ? 23   GLY A CA  1 
ATOM   181  C  C   . GLY A 1 25  ? -17.799 -17.780 -12.285 1.00 15.04 ? ? ? ? ? ? 23   GLY A C   1 
ATOM   182  O  O   . GLY A 1 25  ? -18.514 -16.778 -12.212 1.00 13.63 ? ? ? ? ? ? 23   GLY A O   1 
ATOM   183  N  N   . ARG A 1 26  ? -18.175 -18.964 -11.779 1.00 9.90  ? ? ? ? ? ? 24   ARG A N   1 
ATOM   184  C  CA  . ARG A 1 26  ? -19.415 -19.073 -11.006 1.00 11.19 ? ? ? ? ? ? 24   ARG A CA  1 
ATOM   185  C  C   . ARG A 1 26  ? -19.393 -18.161 -9.788  1.00 10.13 ? ? ? ? ? ? 24   ARG A C   1 
ATOM   186  O  O   . ARG A 1 26  ? -20.414 -17.560 -9.439  1.00 11.96 ? ? ? ? ? ? 24   ARG A O   1 
ATOM   187  C  CB  . ARG A 1 26  ? -19.654 -20.516 -10.551 1.00 13.31 ? ? ? ? ? ? 24   ARG A CB  1 
ATOM   188  C  CG  . ARG A 1 26  ? -20.109 -21.462 -11.634 1.00 19.48 ? ? ? ? ? ? 24   ARG A CG  1 
ATOM   189  C  CD  . ARG A 1 26  ? -20.843 -22.633 -10.996 1.00 19.56 ? ? ? ? ? ? 24   ARG A CD  1 
ATOM   190  N  NE  . ARG A 1 26  ? -20.017 -23.263 -9.972  1.00 18.58 ? ? ? ? ? ? 24   ARG A NE  1 
ATOM   191  C  CZ  . ARG A 1 26  ? -19.135 -24.221 -10.226 1.00 20.21 ? ? ? ? ? ? 24   ARG A CZ  1 
ATOM   192  N  NH1 . ARG A 1 26  ? -18.982 -24.656 -11.468 1.00 17.90 ? ? ? ? ? ? 24   ARG A NH1 1 
ATOM   193  N  NH2 . ARG A 1 26  ? -18.417 -24.746 -9.246  1.00 17.15 ? ? ? ? ? ? 24   ARG A NH2 1 
ATOM   194  N  N   . ALA A 1 27  ? -18.248 -18.065 -9.116  1.00 8.76  ? ? ? ? ? ? 25   ALA A N   1 
ATOM   195  C  CA  . ALA A 1 27  ? -18.162 -17.207 -7.939  1.00 11.38 ? ? ? ? ? ? 25   ALA A CA  1 
ATOM   196  C  C   . ALA A 1 27  ? -18.298 -15.730 -8.303  1.00 12.34 ? ? ? ? ? ? 25   ALA A C   1 
ATOM   197  O  O   . ALA A 1 27  ? -18.891 -14.957 -7.535  1.00 10.40 ? ? ? ? ? ? 25   ALA A O   1 
ATOM   198  C  CB  . ALA A 1 27  ? -16.847 -17.444 -7.201  1.00 12.00 ? ? ? ? ? ? 25   ALA A CB  1 
ATOM   199  N  N   . LEU A 1 28  ? -17.762 -15.317 -9.456  1.00 11.61 ? ? ? ? ? ? 26   LEU A N   1 
ATOM   200  C  CA  . LEU A 1 28  ? -17.953 -13.931 -9.886  1.00 9.76  ? ? ? ? ? ? 26   LEU A CA  1 
ATOM   201  C  C   . LEU A 1 28  ? -19.425 -13.654 -10.158 1.00 11.29 ? ? ? ? ? ? 26   LEU A C   1 
ATOM   202  O  O   . LEU A 1 28  ? -19.964 -12.620 -9.742  1.00 8.85  ? ? ? ? ? ? 26   LEU A O   1 
ATOM   203  C  CB  . LEU A 1 28  ? -17.109 -13.633 -11.128 1.00 7.43  ? ? ? ? ? ? 26   LEU A CB  1 
ATOM   204  C  CG  . LEU A 1 28  ? -15.598 -13.886 -11.048 1.00 10.94 ? ? ? ? ? ? 26   LEU A CG  1 
ATOM   205  C  CD1 . LEU A 1 28  ? -14.919 -13.540 -12.383 1.00 10.71 ? ? ? ? ? ? 26   LEU A CD1 1 
ATOM   206  C  CD2 . LEU A 1 28  ? -14.981 -13.079 -9.909  1.00 10.88 ? ? ? ? ? ? 26   LEU A CD2 1 
ATOM   207  N  N   . ILE A 1 29  ? -20.092 -14.576 -10.853 1.00 9.55  ? ? ? ? ? ? 27   ILE A N   1 
ATOM   208  C  CA  . ILE A 1 29  ? -21.515 -14.420 -11.136 1.00 9.43  ? ? ? ? ? ? 27   ILE A CA  1 
ATOM   209  C  C   . ILE A 1 29  ? -22.310 -14.320 -9.835  1.00 8.46  ? ? ? ? ? ? 27   ILE A C   1 
ATOM   210  O  O   . ILE A 1 29  ? -23.141 -13.420 -9.665  1.00 8.87  ? ? ? ? ? ? 27   ILE A O   1 
ATOM   211  C  CB  . ILE A 1 29  ? -22.005 -15.578 -12.024 1.00 8.44  ? ? ? ? ? ? 27   ILE A CB  1 
ATOM   212  C  CG1 . ILE A 1 29  ? -21.499 -15.393 -13.468 1.00 7.47  ? ? ? ? ? ? 27   ILE A CG1 1 
ATOM   213  C  CG2 . ILE A 1 29  ? -23.525 -15.674 -12.015 1.00 10.30 ? ? ? ? ? ? 27   ILE A CG2 1 
ATOM   214  C  CD1 . ILE A 1 29  ? -21.640 -16.662 -14.318 1.00 8.48  ? ? ? ? ? ? 27   ILE A CD1 1 
ATOM   215  N  N   . GLN A 1 30  ? -22.048 -15.229 -8.890  1.00 9.56  ? ? ? ? ? ? 28   GLN A N   1 
ATOM   216  C  CA  . GLN A 1 30  ? -22.750 -15.187 -7.604  1.00 9.49  ? ? ? ? ? ? 28   GLN A CA  1 
ATOM   217  C  C   . GLN A 1 30  ? -22.522 -13.868 -6.875  1.00 11.62 ? ? ? ? ? ? 28   GLN A C   1 
ATOM   218  O  O   . GLN A 1 30  ? -23.446 -13.328 -6.251  1.00 12.02 ? ? ? ? ? ? 28   GLN A O   1 
ATOM   219  C  CB  . GLN A 1 30  ? -22.309 -16.351 -6.724  1.00 8.74  ? ? ? ? ? ? 28   GLN A CB  1 
ATOM   220  C  CG  . GLN A 1 30  ? -22.942 -17.673 -7.105  1.00 16.98 ? ? ? ? ? ? 28   GLN A CG  1 
ATOM   221  C  CD  . GLN A 1 30  ? -22.731 -18.727 -6.042  1.00 14.65 ? ? ? ? ? ? 28   GLN A CD  1 
ATOM   222  O  OE1 . GLN A 1 30  ? -21.641 -18.862 -5.493  1.00 17.18 ? ? ? ? ? ? 28   GLN A OE1 1 
ATOM   223  N  NE2 . GLN A 1 30  ? -23.777 -19.466 -5.737  1.00 18.26 ? ? ? ? ? ? 28   GLN A NE2 1 
ATOM   224  N  N   . ALA A 1 31  ? -21.297 -13.340 -6.923  1.00 10.99 ? ? ? ? ? ? 29   ALA A N   1 
ATOM   225  C  CA  . ALA A 1 31  ? -21.025 -12.067 -6.261  1.00 8.25  ? ? ? ? ? ? 29   ALA A CA  1 
ATOM   226  C  C   . ALA A 1 31  ? -21.822 -10.930 -6.895  1.00 9.18  ? ? ? ? ? ? 29   ALA A C   1 
ATOM   227  O  O   . ALA A 1 31  ? -22.320 -10.042 -6.194  1.00 8.84  ? ? ? ? ? ? 29   ALA A O   1 
ATOM   228  C  CB  . ALA A 1 31  ? -19.527 -11.759 -6.295  1.00 7.07  ? ? ? ? ? ? 29   ALA A CB  1 
ATOM   229  N  N   . TRP A 1 32  ? -21.943 -10.927 -8.222  1.00 8.66  ? ? ? ? ? ? 30   TRP A N   1 
ATOM   230  C  CA  . TRP A 1 32  ? -22.776 -9.918  -8.867  1.00 9.63  ? ? ? ? ? ? 30   TRP A CA  1 
ATOM   231  C  C   . TRP A 1 32  ? -24.238 -10.085 -8.479  1.00 10.69 ? ? ? ? ? ? 30   TRP A C   1 
ATOM   232  O  O   . TRP A 1 32  ? -24.967 -9.100  -8.303  1.00 10.28 ? ? ? ? ? ? 30   TRP A O   1 
ATOM   233  C  CB  . TRP A 1 32  ? -22.630 -10.015 -10.379 1.00 8.58  ? ? ? ? ? ? 30   TRP A CB  1 
ATOM   234  C  CG  . TRP A 1 32  ? -21.421 -9.335  -10.945 1.00 7.05  ? ? ? ? ? ? 30   TRP A CG  1 
ATOM   235  C  CD1 . TRP A 1 32  ? -20.738 -8.265  -10.423 1.00 9.17  ? ? ? ? ? ? 30   TRP A CD1 1 
ATOM   236  C  CD2 . TRP A 1 32  ? -20.778 -9.669  -12.176 1.00 6.37  ? ? ? ? ? ? 30   TRP A CD2 1 
ATOM   237  N  NE1 . TRP A 1 32  ? -19.698 -7.920  -11.265 1.00 7.85  ? ? ? ? ? ? 30   TRP A NE1 1 
ATOM   238  C  CE2 . TRP A 1 32  ? -19.709 -8.765  -12.351 1.00 6.12  ? ? ? ? ? ? 30   TRP A CE2 1 
ATOM   239  C  CE3 . TRP A 1 32  ? -21.009 -10.651 -13.151 1.00 7.07  ? ? ? ? ? ? 30   TRP A CE3 1 
ATOM   240  C  CZ2 . TRP A 1 32  ? -18.860 -8.824  -13.455 1.00 12.37 ? ? ? ? ? ? 30   TRP A CZ2 1 
ATOM   241  C  CZ3 . TRP A 1 32  ? -20.169 -10.707 -14.251 1.00 9.55  ? ? ? ? ? ? 30   TRP A CZ3 1 
ATOM   242  C  CH2 . TRP A 1 32  ? -19.104 -9.799  -14.394 1.00 10.41 ? ? ? ? ? ? 30   TRP A CH2 1 
ATOM   243  N  N   . GLN A 1 33  ? -24.688 -11.330 -8.355  1.00 8.58  ? ? ? ? ? ? 31   GLN A N   1 
ATOM   244  C  CA  . GLN A 1 33  ? -26.094 -11.575 -8.070  1.00 8.66  ? ? ? ? ? ? 31   GLN A CA  1 
ATOM   245  C  C   . GLN A 1 33  ? -26.420 -11.280 -6.609  1.00 9.83  ? ? ? ? ? ? 31   GLN A C   1 
ATOM   246  O  O   . GLN A 1 33  ? -27.576 -10.998 -6.282  1.00 13.10 ? ? ? ? ? ? 31   GLN A O   1 
ATOM   247  C  CB  . GLN A 1 33  ? -26.451 -13.025 -8.433  1.00 10.32 ? ? ? ? ? ? 31   GLN A CB  1 
ATOM   248  C  CG  . GLN A 1 33  ? -26.366 -13.291 -9.938  1.00 7.65  ? ? ? ? ? ? 31   GLN A CG  1 
ATOM   249  C  CD  . GLN A 1 33  ? -26.680 -14.741 -10.292 1.00 11.05 ? ? ? ? ? ? 31   GLN A CD  1 
ATOM   250  O  OE1 . GLN A 1 33  ? -26.330 -15.662 -9.548  1.00 12.21 ? ? ? ? ? ? 31   GLN A OE1 1 
ATOM   251  N  NE2 . GLN A 1 33  ? -27.296 -14.952 -11.449 1.00 8.08  ? ? ? ? ? ? 31   GLN A NE2 1 
ATOM   252  N  N   . LYS A 1 34  ? -25.424 -11.324 -5.718  1.00 8.77  ? ? ? ? ? ? 32   LYS A N   1 
ATOM   253  C  CA  . LYS A 1 34  ? -25.671 -11.010 -4.315  1.00 10.76 ? ? ? ? ? ? 32   LYS A CA  1 
ATOM   254  C  C   . LYS A 1 34  ? -25.389 -9.546  -4.009  1.00 11.39 ? ? ? ? ? ? 32   LYS A C   1 
ATOM   255  O  O   . LYS A 1 34  ? -26.192 -8.888  -3.342  1.00 11.22 ? ? ? ? ? ? 32   LYS A O   1 
ATOM   256  C  CB  . LYS A 1 34  ? -24.825 -11.919 -3.426  1.00 11.33 ? ? ? ? ? ? 32   LYS A CB  1 
ATOM   257  C  CG  . LYS A 1 34  ? -24.912 -11.622 -1.914  1.00 15.63 ? ? ? ? ? ? 32   LYS A CG  1 
ATOM   258  C  CD  . LYS A 1 34  ? -24.111 -12.659 -1.138  1.00 19.47 ? ? ? ? ? ? 32   LYS A CD  1 
ATOM   259  C  CE  . LYS A 1 34  ? -23.293 -12.032 -0.016  1.00 30.64 ? ? ? ? ? ? 32   LYS A CE  1 
ATOM   260  N  NZ  . LYS A 1 34  ? -23.832 -10.723 0.439   1.00 35.47 ? ? ? ? ? ? 32   LYS A NZ  1 
ATOM   261  N  N   . ASP A 1 35  ? -24.247 -9.028  -4.480  1.00 12.77 ? ? ? ? ? ? 33   ASP A N   1 
ATOM   262  C  CA  . ASP A 1 35  ? -23.747 -7.713  -4.094  1.00 9.13  ? ? ? ? ? ? 33   ASP A CA  1 
ATOM   263  C  C   . ASP A 1 35  ? -23.783 -6.677  -5.213  1.00 10.62 ? ? ? ? ? ? 33   ASP A C   1 
ATOM   264  O  O   . ASP A 1 35  ? -23.585 -5.489  -4.933  1.00 8.12  ? ? ? ? ? ? 33   ASP A O   1 
ATOM   265  C  CB  . ASP A 1 35  ? -22.291 -7.823  -3.612  1.00 10.97 ? ? ? ? ? ? 33   ASP A CB  1 
ATOM   266  C  CG  . ASP A 1 35  ? -22.135 -8.707  -2.384  1.00 17.03 ? ? ? ? ? ? 33   ASP A CG  1 
ATOM   267  O  OD1 . ASP A 1 35  ? -21.031 -9.283  -2.211  1.00 13.12 ? ? ? ? ? ? 33   ASP A OD1 1 
ATOM   268  O  OD2 . ASP A 1 35  ? -23.094 -8.807  -1.587  1.00 14.24 ? ? ? ? ? ? 33   ASP A OD2 1 
ATOM   269  N  N   . GLY A 1 36  ? -23.958 -7.096  -6.468  1.00 9.33  ? ? ? ? ? ? 34   GLY A N   1 
ATOM   270  C  CA  . GLY A 1 36  ? -23.929 -6.186  -7.599  1.00 8.47  ? ? ? ? ? ? 34   GLY A CA  1 
ATOM   271  C  C   . GLY A 1 36  ? -22.553 -5.729  -8.038  1.00 8.75  ? ? ? ? ? ? 34   GLY A C   1 
ATOM   272  O  O   . GLY A 1 36  ? -22.457 -4.943  -8.993  1.00 9.64  ? ? ? ? ? ? 34   GLY A O   1 
ATOM   273  N  N   . ILE A 1 37  ? -21.491 -6.208  -7.394  1.00 5.85  ? ? ? ? ? ? 35   ILE A N   1 
ATOM   274  C  CA  . ILE A 1 37  ? -20.142 -5.688  -7.618  1.00 6.87  ? ? ? ? ? ? 35   ILE A CA  1 
ATOM   275  C  C   . ILE A 1 37  ? -19.171 -6.646  -6.944  1.00 7.99  ? ? ? ? ? ? 35   ILE A C   1 
ATOM   276  O  O   . ILE A 1 37  ? -19.559 -7.410  -6.056  1.00 10.35 ? ? ? ? ? ? 35   ILE A O   1 
ATOM   277  C  CB  . ILE A 1 37  ? -20.028 -4.250  -7.048  1.00 5.45  ? ? ? ? ? ? 35   ILE A CB  1 
ATOM   278  C  CG1 . ILE A 1 37  ? -18.730 -3.564  -7.507  1.00 8.38  ? ? ? ? ? ? 35   ILE A CG1 1 
ATOM   279  C  CG2 . ILE A 1 37  ? -20.155 -4.273  -5.513  1.00 6.29  ? ? ? ? ? ? 35   ILE A CG2 1 
ATOM   280  C  CD1 . ILE A 1 37  ? -18.781 -2.020  -7.398  1.00 10.52 ? ? ? ? ? ? 35   ILE A CD1 1 
ATOM   281  N  N   . PHE A 1 38  ? -17.911 -6.638  -7.390  1.00 6.78  ? ? ? ? ? ? 36   PHE A N   1 
ATOM   282  C  CA  . PHE A 1 38  ? -16.838 -7.245  -6.605  1.00 8.71  ? ? ? ? ? ? 36   PHE A CA  1 
ATOM   283  C  C   . PHE A 1 38  ? -15.539 -6.515  -6.902  1.00 9.35  ? ? ? ? ? ? 36   PHE A C   1 
ATOM   284  O  O   . PHE A 1 38  ? -15.470 -5.661  -7.787  1.00 8.49  ? ? ? ? ? ? 36   PHE A O   1 
ATOM   285  C  CB  . PHE A 1 38  ? -16.681 -8.767  -6.856  1.00 7.54  ? ? ? ? ? ? 36   PHE A CB  1 
ATOM   286  C  CG  . PHE A 1 38  ? -16.566 -9.155  -8.309  1.00 6.78  ? ? ? ? ? ? 36   PHE A CG  1 
ATOM   287  C  CD1 . PHE A 1 38  ? -17.640 -9.741  -8.970  1.00 6.92  ? ? ? ? ? ? 36   PHE A CD1 1 
ATOM   288  C  CD2 . PHE A 1 38  ? -15.383 -8.960  -9.002  1.00 6.83  ? ? ? ? ? ? 36   PHE A CD2 1 
ATOM   289  C  CE1 . PHE A 1 38  ? -17.542 -10.101 -10.313 1.00 6.58  ? ? ? ? ? ? 36   PHE A CE1 1 
ATOM   290  C  CE2 . PHE A 1 38  ? -15.274 -9.318  -10.344 1.00 7.75  ? ? ? ? ? ? 36   PHE A CE2 1 
ATOM   291  C  CZ  . PHE A 1 38  ? -16.359 -9.879  -11.001 1.00 8.16  ? ? ? ? ? ? 36   PHE A CZ  1 
ATOM   292  N  N   . GLN A 1 39  ? -14.504 -6.876  -6.151  1.00 8.87  ? ? ? ? ? ? 37   GLN A N   1 
ATOM   293  C  CA  . GLN A 1 39  ? -13.168 -6.331  -6.314  1.00 10.14 ? ? ? ? ? ? 37   GLN A CA  1 
ATOM   294  C  C   . GLN A 1 39  ? -12.252 -7.362  -6.963  1.00 9.73  ? ? ? ? ? ? 37   GLN A C   1 
ATOM   295  O  O   . GLN A 1 39  ? -12.367 -8.565  -6.712  1.00 8.13  ? ? ? ? ? ? 37   GLN A O   1 
ATOM   296  C  CB  . GLN A 1 39  ? -12.594 -5.899  -4.954  1.00 7.24  ? ? ? ? ? ? 37   GLN A CB  1 
ATOM   297  C  CG  . GLN A 1 39  ? -13.348 -4.716  -4.349  1.00 8.16  ? ? ? ? ? ? 37   GLN A CG  1 
ATOM   298  C  CD  . GLN A 1 39  ? -12.970 -4.374  -2.904  1.00 9.78  ? ? ? ? ? ? 37   GLN A CD  1 
ATOM   299  O  OE1 . GLN A 1 39  ? -13.275 -3.285  -2.445  1.00 13.72 ? ? ? ? ? ? 37   GLN A OE1 1 
ATOM   300  N  NE2 . GLN A 1 39  ? -12.314 -5.295  -2.192  1.00 12.32 ? ? ? ? ? ? 37   GLN A NE2 1 
ATOM   301  N  N   . ILE A 1 40  ? -11.322 -6.889  -7.786  1.00 7.55  ? ? ? ? ? ? 38   ILE A N   1 
ATOM   302  C  CA  . ILE A 1 40  ? -10.248 -7.738  -8.283  1.00 9.73  ? ? ? ? ? ? 38   ILE A CA  1 
ATOM   303  C  C   . ILE A 1 40  ? -8.915  -7.117  -7.887  1.00 10.21 ? ? ? ? ? ? 38   ILE A C   1 
ATOM   304  O  O   . ILE A 1 40  ? -8.721  -5.903  -8.019  1.00 11.22 ? ? ? ? ? ? 38   ILE A O   1 
ATOM   305  C  CB  . ILE A 1 40  ? -10.344 -7.970  -9.813  1.00 11.67 ? ? ? ? ? ? 38   ILE A CB  1 
ATOM   306  C  CG1 . ILE A 1 40  ? -10.402 -6.649  -10.586 1.00 11.26 ? ? ? ? ? ? 38   ILE A CG1 1 
ATOM   307  C  CG2 . ILE A 1 40  ? -11.572 -8.830  -10.127 1.00 7.54  ? ? ? ? ? ? 38   ILE A CG2 1 
ATOM   308  C  CD1 . ILE A 1 40  ? -10.323 -6.853  -12.143 1.00 10.79 ? ? ? ? ? ? 38   ILE A CD1 1 
ATOM   309  N  N   . LYS A 1 41  ? -8.010  -7.958  -7.383  1.00 11.73 ? ? ? ? ? ? 39   LYS A N   1 
ATOM   310  C  CA  . LYS A 1 41  ? -6.706  -7.521  -6.894  1.00 14.43 ? ? ? ? ? ? 39   LYS A CA  1 
ATOM   311  C  C   . LYS A 1 41  ? -5.828  -7.065  -8.052  1.00 15.72 ? ? ? ? ? ? 39   LYS A C   1 
ATOM   312  O  O   . LYS A 1 41  ? -5.795  -7.702  -9.109  1.00 16.83 ? ? ? ? ? ? 39   LYS A O   1 
ATOM   313  C  CB  . LYS A 1 41  ? -5.997  -8.674  -6.178  1.00 18.69 ? ? ? ? ? ? 39   LYS A CB  1 
ATOM   314  C  CG  . LYS A 1 41  ? -6.790  -9.404  -5.115  1.00 31.73 ? ? ? ? ? ? 39   LYS A CG  1 
ATOM   315  C  CD  . LYS A 1 41  ? -5.869  -10.227 -4.219  1.00 44.61 ? ? ? ? ? ? 39   LYS A CD  1 
ATOM   316  C  CE  . LYS A 1 41  ? -6.560  -10.674 -2.938  1.00 51.48 ? ? ? ? ? ? 39   LYS A CE  1 
ATOM   317  N  NZ  . LYS A 1 41  ? -6.045  -9.939  -1.759  1.00 53.04 ? ? ? ? ? ? 39   LYS A NZ  1 
ATOM   318  N  N   . THR A 1 42  ? -5.092  -5.979  -7.844  1.00 13.44 ? ? ? ? ? ? 40   THR A N   1 
ATOM   319  C  CA  . THR A 1 42  ? -4.170  -5.469  -8.847  1.00 13.05 ? ? ? ? ? ? 40   THR A CA  1 
ATOM   320  C  C   . THR A 1 42  ? -2.735  -5.820  -8.476  1.00 14.50 ? ? ? ? ? ? 40   THR A C   1 
ATOM   321  O  O   . THR A 1 42  ? -2.381  -5.854  -7.292  1.00 16.40 ? ? ? ? ? ? 40   THR A O   1 
ATOM   322  C  CB  . THR A 1 42  ? -4.303  -3.958  -8.989  1.00 11.52 ? ? ? ? ? ? 40   THR A CB  1 
ATOM   323  O  OG1 . THR A 1 42  ? -4.212  -3.361  -7.694  1.00 13.04 ? ? ? ? ? ? 40   THR A OG1 1 
ATOM   324  C  CG2 . THR A 1 42  ? -5.646  -3.602  -9.604  1.00 13.21 ? ? ? ? ? ? 40   THR A CG2 1 
ATOM   325  N  N   . ASP A 1 43  ? -1.915  -6.081  -9.494  1.00 11.87 ? ? ? ? ? ? 41   ASP A N   1 
ATOM   326  C  CA  . ASP A 1 43  ? -0.492  -6.328  -9.301  1.00 17.94 ? ? ? ? ? ? 41   ASP A CA  1 
ATOM   327  C  C   . ASP A 1 43  ? 0.269   -5.004  -9.434  1.00 12.81 ? ? ? ? ? ? 41   ASP A C   1 
ATOM   328  O  O   . ASP A 1 43  ? -0.331  -3.928  -9.511  1.00 14.00 ? ? ? ? ? ? 41   ASP A O   1 
ATOM   329  C  CB  . ASP A 1 43  ? -0.003  -7.423  -10.260 1.00 13.81 ? ? ? ? ? ? 41   ASP A CB  1 
ATOM   330  C  CG  . ASP A 1 43  ? -0.032  -7.011  -11.741 1.00 16.71 ? ? ? ? ? ? 41   ASP A CG  1 
ATOM   331  O  OD1 . ASP A 1 43  ? -0.053  -5.814  -12.088 1.00 12.35 ? ? ? ? ? ? 41   ASP A OD1 1 
ATOM   332  O  OD2 . ASP A 1 43  ? -0.011  -7.919  -12.583 1.00 13.69 ? ? ? ? ? ? 41   ASP A OD2 1 
ATOM   333  N  N   . SER A 1 44  ? 1.603   -5.062  -9.449  1.00 12.14 ? ? ? ? ? ? 42   SER A N   1 
ATOM   334  C  CA  . SER A 1 44  ? 2.387   -3.828  -9.392  1.00 15.66 ? ? ? ? ? ? 42   SER A CA  1 
ATOM   335  C  C   . SER A 1 44  ? 2.186   -2.977  -10.644 1.00 13.32 ? ? ? ? ? ? 42   SER A C   1 
ATOM   336  O  O   . SER A 1 44  ? 2.127   -1.744  -10.564 1.00 11.44 ? ? ? ? ? ? 42   SER A O   1 
ATOM   337  C  CB  . SER A 1 44  ? 3.869   -4.155  -9.182  1.00 15.04 ? ? ? ? ? ? 42   SER A CB  1 
ATOM   338  O  OG  . SER A 1 44  ? 4.446   -4.727  -10.342 1.00 13.31 ? ? ? ? ? ? 42   SER A OG  1 
ATOM   339  N  N   . GLU A 1 45  ? 2.052   -3.611  -11.803 1.00 12.51 ? ? ? ? ? ? 43   GLU A N   1 
ATOM   340  C  CA  . GLU A 1 45  ? 1.845   -2.843  -13.028 1.00 14.81 ? ? ? ? ? ? 43   GLU A CA  1 
ATOM   341  C  C   . GLU A 1 45  ? 0.433   -2.284  -13.104 1.00 15.63 ? ? ? ? ? ? 43   GLU A C   1 
ATOM   342  O  O   . GLU A 1 45  ? 0.234   -1.146  -13.544 1.00 12.85 ? ? ? ? ? ? 43   GLU A O   1 
ATOM   343  C  CB  . GLU A 1 45  ? 2.114   -3.718  -14.255 1.00 13.59 ? ? ? ? ? ? 43   GLU A CB  1 
ATOM   344  C  CG  . GLU A 1 45  ? 3.577   -3.820  -14.637 1.00 16.54 ? ? ? ? ? ? 43   GLU A CG  1 
ATOM   345  C  CD  . GLU A 1 45  ? 4.167   -2.482  -15.017 1.00 18.27 ? ? ? ? ? ? 43   GLU A CD  1 
ATOM   346  O  OE1 . GLU A 1 45  ? 4.184   -2.162  -16.227 1.00 19.29 ? ? ? ? ? ? 43   GLU A OE1 1 
ATOM   347  O  OE2 . GLU A 1 45  ? 4.615   -1.749  -14.108 1.00 20.11 ? ? ? ? ? ? 43   GLU A OE2 1 
ATOM   348  N  N   . GLN A 1 46  ? -0.562  -3.089  -12.732 1.00 11.32 ? ? ? ? ? ? 44   GLN A N   1 
ATOM   349  C  CA  . GLN A 1 46  ? -1.936  -2.610  -12.763 1.00 12.40 ? ? ? ? ? ? 44   GLN A CA  1 
ATOM   350  C  C   . GLN A 1 46  ? -2.099  -1.421  -11.837 1.00 11.39 ? ? ? ? ? ? 44   GLN A C   1 
ATOM   351  O  O   . GLN A 1 46  ? -2.707  -0.407  -12.206 1.00 14.30 ? ? ? ? ? ? 44   GLN A O   1 
ATOM   352  C  CB  . GLN A 1 46  ? -2.889  -3.739  -12.380 1.00 11.44 ? ? ? ? ? ? 44   GLN A CB  1 
ATOM   353  C  CG  . GLN A 1 46  ? -2.939  -4.840  -13.401 1.00 10.90 ? ? ? ? ? ? 44   GLN A CG  1 
ATOM   354  C  CD  . GLN A 1 46  ? -3.666  -6.069  -12.899 1.00 14.39 ? ? ? ? ? ? 44   GLN A CD  1 
ATOM   355  O  OE1 . GLN A 1 46  ? -3.469  -6.495  -11.761 1.00 13.59 ? ? ? ? ? ? 44   GLN A OE1 1 
ATOM   356  N  NE2 . GLN A 1 46  ? -4.508  -6.650  -13.748 1.00 15.42 ? ? ? ? ? ? 44   GLN A NE2 1 
ATOM   357  N  N   . ASP A 1 47  ? -1.506  -1.503  -10.652 1.00 12.49 ? ? ? ? ? ? 45   ASP A N   1 
ATOM   358  C  CA  . ASP A 1 47  ? -1.592  -0.387  -9.724  1.00 13.29 ? ? ? ? ? ? 45   ASP A CA  1 
ATOM   359  C  C   . ASP A 1 47  ? -0.786  0.816   -10.207 1.00 13.54 ? ? ? ? ? ? 45   ASP A C   1 
ATOM   360  O  O   . ASP A 1 47  ? -1.240  1.963   -10.083 1.00 12.73 ? ? ? ? ? ? 45   ASP A O   1 
ATOM   361  C  CB  . ASP A 1 47  ? -1.122  -0.810  -8.333  1.00 13.00 ? ? ? ? ? ? 45   ASP A CB  1 
ATOM   362  C  CG  . ASP A 1 47  ? -1.193  0.336   -7.360  1.00 19.60 ? ? ? ? ? ? 45   ASP A CG  1 
ATOM   363  O  OD1 . ASP A 1 47  ? -2.324  0.770   -7.066  1.00 24.48 ? ? ? ? ? ? 45   ASP A OD1 1 
ATOM   364  O  OD2 . ASP A 1 47  ? -0.135  0.839   -6.940  1.00 25.99 ? ? ? ? ? ? 45   ASP A OD2 1 
ATOM   365  N  N   . ARG A 1 48  ? 0.418   0.590   -10.736 1.00 10.46 ? ? ? ? ? ? 46   ARG A N   1 
ATOM   366  C  CA  . ARG A 1 48  ? 1.222   1.721   -11.198 1.00 16.59 ? ? ? ? ? ? 46   ARG A CA  1 
ATOM   367  C  C   . ARG A 1 48  ? 0.496   2.500   -12.284 1.00 12.75 ? ? ? ? ? ? 46   ARG A C   1 
ATOM   368  O  O   . ARG A 1 48  ? 0.470   3.739   -12.267 1.00 11.01 ? ? ? ? ? ? 46   ARG A O   1 
ATOM   369  C  CB  . ARG A 1 48  ? 2.585   1.257   -11.717 1.00 16.92 ? ? ? ? ? ? 46   ARG A CB  1 
ATOM   370  C  CG  . ARG A 1 48  ? 3.397   2.394   -12.339 1.00 19.06 ? ? ? ? ? ? 46   ARG A CG  1 
ATOM   371  C  CD  . ARG A 1 48  ? 4.721   1.918   -12.956 1.00 21.72 ? ? ? ? ? ? 46   ARG A CD  1 
ATOM   372  N  NE  . ARG A 1 48  ? 4.542   1.089   -14.150 1.00 21.34 ? ? ? ? ? ? 46   ARG A NE  1 
ATOM   373  C  CZ  . ARG A 1 48  ? 4.275   1.564   -15.366 1.00 24.70 ? ? ? ? ? ? 46   ARG A CZ  1 
ATOM   374  N  NH1 . ARG A 1 48  ? 4.146   2.868   -15.568 1.00 21.20 ? ? ? ? ? ? 46   ARG A NH1 1 
ATOM   375  N  NH2 . ARG A 1 48  ? 4.135   0.734   -16.384 1.00 22.06 ? ? ? ? ? ? 46   ARG A NH2 1 
ATOM   376  N  N   . LYS A 1 49  ? -0.084  1.792   -13.253 1.00 9.54  ? ? ? ? ? ? 47   LYS A N   1 
ATOM   377  C  CA  . LYS A 1 49  ? -0.786  2.486   -14.325 1.00 9.60  ? ? ? ? ? ? 47   LYS A CA  1 
ATOM   378  C  C   . LYS A 1 49  ? -2.019  3.217   -13.802 1.00 11.78 ? ? ? ? ? ? 47   LYS A C   1 
ATOM   379  O  O   . LYS A 1 49  ? -2.357  4.297   -14.303 1.00 10.53 ? ? ? ? ? ? 47   LYS A O   1 
ATOM   380  C  CB  . LYS A 1 49  ? -1.138  1.490   -15.435 1.00 9.52  ? ? ? ? ? ? 47   LYS A CB  1 
ATOM   381  C  CG  . LYS A 1 49  ? 0.119   0.927   -16.121 1.00 11.78 ? ? ? ? ? ? 47   LYS A CG  1 
ATOM   382  C  CD  . LYS A 1 49  ? -0.176  -0.290  -16.991 1.00 13.54 ? ? ? ? ? ? 47   LYS A CD  1 
ATOM   383  C  CE  . LYS A 1 49  ? 1.122   -0.900  -17.545 1.00 21.14 ? ? ? ? ? ? 47   LYS A CE  1 
ATOM   384  N  NZ  . LYS A 1 49  ? 0.887   -2.121  -18.370 1.00 18.27 ? ? ? ? ? ? 47   LYS A NZ  1 
ATOM   385  N  N   . THR A 1 50  ? -2.703  2.654   -12.802 1.00 11.44 ? ? ? ? ? ? 48   THR A N   1 
ATOM   386  C  CA  . THR A 1 50  ? -3.831  3.356   -12.200 1.00 9.70  ? ? ? ? ? ? 48   THR A CA  1 
ATOM   387  C  C   . THR A 1 50  ? -3.379  4.674   -11.572 1.00 15.89 ? ? ? ? ? ? 48   THR A C   1 
ATOM   388  O  O   . THR A 1 50  ? -3.974  5.732   -11.815 1.00 12.74 ? ? ? ? ? ? 48   THR A O   1 
ATOM   389  C  CB  . THR A 1 50  ? -4.504  2.468   -11.147 1.00 12.95 ? ? ? ? ? ? 48   THR A CB  1 
ATOM   390  O  OG1 . THR A 1 50  ? -4.862  1.209   -11.729 1.00 11.81 ? ? ? ? ? ? 48   THR A OG1 1 
ATOM   391  C  CG2 . THR A 1 50  ? -5.769  3.152   -10.577 1.00 13.09 ? ? ? ? ? ? 48   THR A CG2 1 
ATOM   392  N  N   . GLN A 1 51  ? -2.313  4.629   -10.765 1.00 12.62 ? ? ? ? ? ? 49   GLN A N   1 
ATOM   393  C  CA  . GLN A 1 51  ? -1.876  5.833   -10.060 1.00 13.81 ? ? ? ? ? ? 49   GLN A CA  1 
ATOM   394  C  C   . GLN A 1 51  ? -1.383  6.896   -11.028 1.00 13.91 ? ? ? ? ? ? 49   GLN A C   1 
ATOM   395  O  O   . GLN A 1 51  ? -1.634  8.089   -10.825 1.00 14.06 ? ? ? ? ? ? 49   GLN A O   1 
ATOM   396  C  CB  . GLN A 1 51  ? -0.781  5.493   -9.046  1.00 17.25 ? ? ? ? ? ? 49   GLN A CB  1 
ATOM   397  C  CG  . GLN A 1 51  ? -1.170  4.395   -8.053  1.00 22.07 ? ? ? ? ? ? 49   GLN A CG  1 
ATOM   398  C  CD  . GLN A 1 51  ? -2.504  4.663   -7.375  1.00 27.37 ? ? ? ? ? ? 49   GLN A CD  1 
ATOM   399  O  OE1 . GLN A 1 51  ? -2.837  5.807   -7.057  1.00 25.84 ? ? ? ? ? ? 49   GLN A OE1 1 
ATOM   400  N  NE2 . GLN A 1 51  ? -3.283  3.604   -7.162  1.00 31.06 ? ? ? ? ? ? 49   GLN A NE2 1 
ATOM   401  N  N   . GLU A 1 52  ? -0.673  6.488   -12.080 1.00 13.15 ? ? ? ? ? ? 50   GLU A N   1 
ATOM   402  C  CA  . GLU A 1 52  ? -0.171  7.461   -13.042 1.00 14.21 ? ? ? ? ? ? 50   GLU A CA  1 
ATOM   403  C  C   . GLU A 1 52  ? -1.316  8.119   -13.810 1.00 15.77 ? ? ? ? ? ? 50   GLU A C   1 
ATOM   404  O  O   . GLU A 1 52  ? -1.263  9.320   -14.104 1.00 15.05 ? ? ? ? ? ? 50   GLU A O   1 
ATOM   405  C  CB  . GLU A 1 52  ? 0.820   6.775   -13.984 1.00 16.65 ? ? ? ? ? ? 50   GLU A CB  1 
ATOM   406  C  CG  . GLU A 1 52  ? 2.152   6.450   -13.286 1.00 18.99 ? ? ? ? ? ? 50   GLU A CG  1 
ATOM   407  C  CD  . GLU A 1 52  ? 3.225   5.951   -14.236 1.00 25.03 ? ? ? ? ? ? 50   GLU A CD  1 
ATOM   408  O  OE1 . GLU A 1 52  ? 4.176   5.291   -13.763 1.00 23.29 ? ? ? ? ? ? 50   GLU A OE1 1 
ATOM   409  O  OE2 . GLU A 1 52  ? 3.123   6.226   -15.450 1.00 27.96 ? ? ? ? ? ? 50   GLU A OE2 1 
ATOM   410  N  N   . ALA A 1 53  ? -2.366  7.355   -14.132 1.00 14.91 ? ? ? ? ? ? 51   ALA A N   1 
ATOM   411  C  CA  . ALA A 1 53  ? -3.535  7.939   -14.785 1.00 14.36 ? ? ? ? ? ? 51   ALA A CA  1 
ATOM   412  C  C   . ALA A 1 53  ? -4.247  8.923   -13.866 1.00 14.44 ? ? ? ? ? ? 51   ALA A C   1 
ATOM   413  O  O   . ALA A 1 53  ? -4.658  10.001  -14.306 1.00 13.49 ? ? ? ? ? ? 51   ALA A O   1 
ATOM   414  C  CB  . ALA A 1 53  ? -4.502  6.842   -15.237 1.00 13.70 ? ? ? ? ? ? 51   ALA A CB  1 
ATOM   415  N  N   . MET A 1 54  ? -4.412  8.573   -12.589 1.00 13.08 ? ? ? ? ? ? 52   MET A N   1 
ATOM   416  C  CA  . MET A 1 54  ? -5.027  9.513   -11.656 1.00 14.18 ? ? ? ? ? ? 52   MET A CA  1 
ATOM   417  C  C   . MET A 1 54  ? -4.188  10.782  -11.519 1.00 12.57 ? ? ? ? ? ? 52   MET A C   1 
ATOM   418  O  O   . MET A 1 54  ? -4.730  11.892  -11.451 1.00 14.61 ? ? ? ? ? ? 52   MET A O   1 
ATOM   419  C  CB  . MET A 1 54  ? -5.234  8.841   -10.296 1.00 19.75 ? ? ? ? ? ? 52   MET A CB  1 
ATOM   420  C  CG  . MET A 1 54  ? -6.149  7.637   -10.351 1.00 27.40 ? ? ? ? ? ? 52   MET A CG  1 
ATOM   421  S  SD  . MET A 1 54  ? -7.887  8.120   -10.464 1.00 23.16 ? ? ? ? ? ? 52   MET A SD  1 
ATOM   422  C  CE  . MET A 1 54  ? -8.239  8.367   -8.742  1.00 26.19 ? ? ? ? ? ? 52   MET A CE  1 
ATOM   423  N  N   . ALA A 1 55  ? -2.862  10.640  -11.511 1.00 14.90 ? ? ? ? ? ? 53   ALA A N   1 
ATOM   424  C  CA  . ALA A 1 55  ? -1.989  11.807  -11.396 1.00 17.74 ? ? ? ? ? ? 53   ALA A CA  1 
ATOM   425  C  C   . ALA A 1 55  ? -2.078  12.698  -12.633 1.00 14.62 ? ? ? ? ? ? 53   ALA A C   1 
ATOM   426  O  O   . ALA A 1 55  ? -2.066  13.932  -12.522 1.00 12.80 ? ? ? ? ? ? 53   ALA A O   1 
ATOM   427  C  CB  . ALA A 1 55  ? -0.550  11.351  -11.159 1.00 15.49 ? ? ? ? ? ? 53   ALA A CB  1 
ATOM   428  N  N   . ALA A 1 56  ? -2.145  12.097  -13.820 1.00 10.62 ? ? ? ? ? ? 54   ALA A N   1 
ATOM   429  C  CA  . ALA A 1 56  ? -2.335  12.892  -15.030 1.00 12.51 ? ? ? ? ? ? 54   ALA A CA  1 
ATOM   430  C  C   . ALA A 1 56  ? -3.685  13.607  -15.020 1.00 11.61 ? ? ? ? ? ? 54   ALA A C   1 
ATOM   431  O  O   . ALA A 1 56  ? -3.784  14.764  -15.450 1.00 10.61 ? ? ? ? ? ? 54   ALA A O   1 
ATOM   432  C  CB  . ALA A 1 56  ? -2.199  12.004  -16.269 1.00 12.98 ? ? ? ? ? ? 54   ALA A CB  1 
ATOM   433  N  N   . SER A 1 57  ? -4.736  12.931  -14.547 1.00 10.37 ? ? ? ? ? ? 55   SER A N   1 
ATOM   434  C  CA  . SER A 1 57  ? -6.052  13.560  -14.455 1.00 14.22 ? ? ? ? ? ? 55   SER A CA  1 
ATOM   435  C  C   . SER A 1 57  ? -6.013  14.777  -13.533 1.00 11.38 ? ? ? ? ? ? 55   SER A C   1 
ATOM   436  O  O   . SER A 1 57  ? -6.535  15.851  -13.866 1.00 13.04 ? ? ? ? ? ? 55   SER A O   1 
ATOM   437  C  CB  . SER A 1 57  ? -7.080  12.532  -13.963 1.00 9.01  ? ? ? ? ? ? 55   SER A CB  1 
ATOM   438  O  OG  . SER A 1 57  ? -8.378  13.099  -13.863 1.00 8.96  ? ? ? ? ? ? 55   SER A OG  1 
ATOM   439  N  N   . LYS A 1 58  ? -5.387  14.626  -12.369 1.00 11.24 ? ? ? ? ? ? 56   LYS A N   1 
ATOM   440  C  CA  . LYS A 1 58  ? -5.267  15.746  -11.441 1.00 15.53 ? ? ? ? ? ? 56   LYS A CA  1 
ATOM   441  C  C   . LYS A 1 58  ? -4.524  16.923  -12.070 1.00 17.02 ? ? ? ? ? ? 56   LYS A C   1 
ATOM   442  O  O   . LYS A 1 58  ? -4.974  18.072  -11.967 1.00 14.27 ? ? ? ? ? ? 56   LYS A O   1 
ATOM   443  C  CB  . LYS A 1 58  ? -4.574  15.288  -10.159 1.00 15.50 ? ? ? ? ? ? 56   LYS A CB  1 
ATOM   444  C  CG  . LYS A 1 58  ? -4.553  16.351  -9.081  1.00 19.97 ? ? ? ? ? ? 56   LYS A CG  1 
ATOM   445  C  CD  . LYS A 1 58  ? -4.027  15.785  -7.763  1.00 34.03 ? ? ? ? ? ? 56   LYS A CD  1 
ATOM   446  C  CE  . LYS A 1 58  ? -4.541  16.578  -6.564  1.00 36.05 ? ? ? ? ? ? 56   LYS A CE  1 
ATOM   447  N  NZ  . LYS A 1 58  ? -4.343  15.806  -5.296  1.00 36.73 ? ? ? ? ? ? 56   LYS A NZ  1 
ATOM   448  N  N   . GLN A 1 59  ? -3.403  16.661  -12.747 1.00 13.54 ? ? ? ? ? ? 57   GLN A N   1 
ATOM   449  C  CA  . GLN A 1 59  ? -2.690  17.743  -13.421 1.00 17.02 ? ? ? ? ? ? 57   GLN A CA  1 
ATOM   450  C  C   . GLN A 1 59  ? -3.578  18.425  -14.463 1.00 17.27 ? ? ? ? ? ? 57   GLN A C   1 
ATOM   451  O  O   . GLN A 1 59  ? -3.661  19.663  -14.499 1.00 16.08 ? ? ? ? ? ? 57   GLN A O   1 
ATOM   452  C  CB  . GLN A 1 59  ? -1.408  17.208  -14.058 1.00 14.78 ? ? ? ? ? ? 57   GLN A CB  1 
ATOM   453  C  CG  . GLN A 1 59  ? -0.418  18.252  -14.616 1.00 29.08 ? ? ? ? ? ? 57   GLN A CG  1 
ATOM   454  C  CD  . GLN A 1 59  ? -1.006  19.199  -15.667 1.00 48.19 ? ? ? ? ? ? 57   GLN A CD  1 
ATOM   455  O  OE1 . GLN A 1 59  ? -1.427  18.778  -16.751 1.00 56.87 ? ? ? ? ? ? 57   GLN A OE1 1 
ATOM   456  N  NE2 . GLN A 1 59  ? -1.052  20.485  -15.332 1.00 49.65 ? ? ? ? ? ? 57   GLN A NE2 1 
ATOM   457  N  N   . PHE A 1 60  ? -4.255  17.636  -15.306 1.00 11.15 ? ? ? ? ? ? 58   PHE A N   1 
ATOM   458  C  CA  . PHE A 1 60  ? -5.064  18.232  -16.362 1.00 14.93 ? ? ? ? ? ? 58   PHE A CA  1 
ATOM   459  C  C   . PHE A 1 60  ? -6.184  19.098  -15.800 1.00 13.43 ? ? ? ? ? ? 58   PHE A C   1 
ATOM   460  O  O   . PHE A 1 60  ? -6.472  20.181  -16.335 1.00 10.35 ? ? ? ? ? ? 58   PHE A O   1 
ATOM   461  C  CB  . PHE A 1 60  ? -5.635  17.142  -17.256 1.00 11.64 ? ? ? ? ? ? 58   PHE A CB  1 
ATOM   462  C  CG  . PHE A 1 60  ? -6.746  17.625  -18.168 1.00 15.75 ? ? ? ? ? ? 58   PHE A CG  1 
ATOM   463  C  CD1 . PHE A 1 60  ? -6.469  18.415  -19.277 1.00 12.83 ? ? ? ? ? ? 58   PHE A CD1 1 
ATOM   464  C  CD2 . PHE A 1 60  ? -8.069  17.281  -17.918 1.00 14.85 ? ? ? ? ? ? 58   PHE A CD2 1 
ATOM   465  C  CE1 . PHE A 1 60  ? -7.483  18.849  -20.135 1.00 13.39 ? ? ? ? ? ? 58   PHE A CE1 1 
ATOM   466  C  CE2 . PHE A 1 60  ? -9.092  17.703  -18.762 1.00 13.42 ? ? ? ? ? ? 58   PHE A CE2 1 
ATOM   467  C  CZ  . PHE A 1 60  ? -8.804  18.502  -19.877 1.00 11.81 ? ? ? ? ? ? 58   PHE A CZ  1 
ATOM   468  N  N   . CYS A 1 61  ? -6.830  18.640  -14.726 1.00 12.37 ? ? ? ? ? ? 59   CYS A N   1 
ATOM   469  C  CA  . CYS A 1 61  ? -7.994  19.355  -14.218 1.00 13.99 ? ? ? ? ? ? 59   CYS A CA  1 
ATOM   470  C  C   . CYS A 1 61  ? -7.614  20.694  -13.596 1.00 17.94 ? ? ? ? ? ? 59   CYS A C   1 
ATOM   471  O  O   . CYS A 1 61  ? -8.469  21.580  -13.497 1.00 19.69 ? ? ? ? ? ? 59   CYS A O   1 
ATOM   472  C  CB  . CYS A 1 61  ? -8.756  18.494  -13.204 1.00 15.48 ? ? ? ? ? ? 59   CYS A CB  1 
ATOM   473  S  SG  . CYS A 1 61  ? -9.691  17.128  -13.976 1.00 14.77 ? ? ? ? ? ? 59   CYS A SG  1 
ATOM   474  N  N   . LYS A 1 62  ? -6.348  20.868  -13.201 1.00 14.52 ? ? ? ? ? ? 60   LYS A N   1 
ATOM   475  C  CA  . LYS A 1 62  ? -5.896  22.167  -12.715 1.00 17.93 ? ? ? ? ? ? 60   LYS A CA  1 
ATOM   476  C  C   . LYS A 1 62  ? -5.658  23.168  -13.840 1.00 22.46 ? ? ? ? ? ? 60   LYS A C   1 
ATOM   477  O  O   . LYS A 1 62  ? -5.456  24.354  -13.553 1.00 20.93 ? ? ? ? ? ? 60   LYS A O   1 
ATOM   478  C  CB  . LYS A 1 62  ? -4.628  22.023  -11.872 1.00 18.34 ? ? ? ? ? ? 60   LYS A CB  1 
ATOM   479  C  CG  . LYS A 1 62  ? -4.684  20.939  -10.814 1.00 25.79 ? ? ? ? ? ? 60   LYS A CG  1 
ATOM   480  C  CD  . LYS A 1 62  ? -5.982  21.008  -10.009 1.00 35.26 ? ? ? ? ? ? 60   LYS A CD  1 
ATOM   481  C  CE  . LYS A 1 62  ? -6.353  19.645  -9.383  1.00 41.24 ? ? ? ? ? ? 60   LYS A CE  1 
ATOM   482  N  NZ  . LYS A 1 62  ? -6.941  18.706  -10.381 1.00 29.26 ? ? ? ? ? ? 60   LYS A NZ  1 
ATOM   483  N  N   . GLU A 1 63  ? -5.673  22.736  -15.108 1.00 13.84 ? ? ? ? ? ? 61   GLU A N   1 
ATOM   484  C  CA  . GLU A 1 63  ? -5.591  23.691  -16.205 1.00 16.93 ? ? ? ? ? ? 61   GLU A CA  1 
ATOM   485  C  C   . GLU A 1 63  ? -6.830  24.592  -16.224 1.00 18.63 ? ? ? ? ? ? 61   GLU A C   1 
ATOM   486  O  O   . GLU A 1 63  ? -7.893  24.221  -15.716 1.00 15.74 ? ? ? ? ? ? 61   GLU A O   1 
ATOM   487  C  CB  . GLU A 1 63  ? -5.457  22.961  -17.545 1.00 16.17 ? ? ? ? ? ? 61   GLU A CB  1 
ATOM   488  C  CG  . GLU A 1 63  ? -4.255  22.023  -17.652 1.00 21.00 ? ? ? ? ? ? 61   GLU A CG  1 
ATOM   489  C  CD  . GLU A 1 63  ? -2.963  22.747  -18.009 1.00 31.59 ? ? ? ? ? ? 61   GLU A CD  1 
ATOM   490  O  OE1 . GLU A 1 63  ? -2.967  23.997  -18.068 1.00 29.64 ? ? ? ? ? ? 61   GLU A OE1 1 
ATOM   491  O  OE2 . GLU A 1 63  ? -1.946  22.058  -18.242 1.00 39.95 ? ? ? ? ? ? 61   GLU A OE2 1 
ATOM   492  N  N   . PRO A 1 64  ? -6.717  25.784  -16.813 1.00 21.58 ? ? ? ? ? ? 62   PRO A N   1 
ATOM   493  C  CA  . PRO A 1 64  ? -7.885  26.669  -16.908 1.00 19.77 ? ? ? ? ? ? 62   PRO A CA  1 
ATOM   494  C  C   . PRO A 1 64  ? -8.954  26.084  -17.811 1.00 17.81 ? ? ? ? ? ? 62   PRO A C   1 
ATOM   495  O  O   . PRO A 1 64  ? -8.660  25.401  -18.798 1.00 14.99 ? ? ? ? ? ? 62   PRO A O   1 
ATOM   496  C  CB  . PRO A 1 64  ? -7.308  27.958  -17.507 1.00 21.45 ? ? ? ? ? ? 62   PRO A CB  1 
ATOM   497  C  CG  . PRO A 1 64  ? -6.084  27.522  -18.228 1.00 20.55 ? ? ? ? ? ? 62   PRO A CG  1 
ATOM   498  C  CD  . PRO A 1 64  ? -5.518  26.387  -17.422 1.00 19.25 ? ? ? ? ? ? 62   PRO A CD  1 
ATOM   499  N  N   . LEU A 1 65  ? -10.212 26.378  -17.470 1.00 15.83 ? ? ? ? ? ? 63   LEU A N   1 
ATOM   500  C  CA  . LEU A 1 65  ? -11.326 25.882  -18.275 1.00 16.76 ? ? ? ? ? ? 63   LEU A CA  1 
ATOM   501  C  C   . LEU A 1 65  ? -11.183 26.260  -19.746 1.00 16.58 ? ? ? ? ? ? 63   LEU A C   1 
ATOM   502  O  O   . LEU A 1 65  ? -11.606 25.500  -20.624 1.00 12.30 ? ? ? ? ? ? 63   LEU A O   1 
ATOM   503  C  CB  . LEU A 1 65  ? -12.659 26.397  -17.722 1.00 17.87 ? ? ? ? ? ? 63   LEU A CB  1 
ATOM   504  C  CG  . LEU A 1 65  ? -13.902 25.817  -18.411 1.00 18.78 ? ? ? ? ? ? 63   LEU A CG  1 
ATOM   505  C  CD1 . LEU A 1 65  ? -14.013 24.285  -18.219 1.00 17.53 ? ? ? ? ? ? 63   LEU A CD1 1 
ATOM   506  C  CD2 . LEU A 1 65  ? -15.178 26.521  -17.956 1.00 20.76 ? ? ? ? ? ? 63   LEU A CD2 1 
ATOM   507  N  N   . THR A 1 66  ? -10.586 27.417  -20.051 1.00 19.06 ? ? ? ? ? ? 64   THR A N   1 
ATOM   508  C  CA  . THR A 1 66  ? -10.393 27.757  -21.460 1.00 15.94 ? ? ? ? ? ? 64   THR A CA  1 
ATOM   509  C  C   . THR A 1 66  ? -9.568  26.691  -22.179 1.00 16.89 ? ? ? ? ? ? 64   THR A C   1 
ATOM   510  O  O   . THR A 1 66  ? -9.878  26.313  -23.316 1.00 17.01 ? ? ? ? ? ? 64   THR A O   1 
ATOM   511  C  CB  . THR A 1 66  ? -9.727  29.131  -21.596 1.00 22.40 ? ? ? ? ? ? 64   THR A CB  1 
ATOM   512  O  OG1 . THR A 1 66  ? -8.580  29.191  -20.745 1.00 24.45 ? ? ? ? ? ? 64   THR A OG1 1 
ATOM   513  C  CG2 . THR A 1 66  ? -10.701 30.234  -21.198 1.00 19.60 ? ? ? ? ? ? 64   THR A CG2 1 
ATOM   514  N  N   . PHE A 1 67  ? -8.523  26.177  -21.530 1.00 19.26 ? ? ? ? ? ? 65   PHE A N   1 
ATOM   515  C  CA  . PHE A 1 67  ? -7.740  25.119  -22.163 1.00 15.04 ? ? ? ? ? ? 65   PHE A CA  1 
ATOM   516  C  C   . PHE A 1 67  ? -8.489  23.789  -22.162 1.00 15.09 ? ? ? ? ? ? 65   PHE A C   1 
ATOM   517  O  O   . PHE A 1 67  ? -8.520  23.084  -23.180 1.00 14.61 ? ? ? ? ? ? 65   PHE A O   1 
ATOM   518  C  CB  . PHE A 1 67  ? -6.393  24.964  -21.467 1.00 14.94 ? ? ? ? ? ? 65   PHE A CB  1 
ATOM   519  C  CG  . PHE A 1 67  ? -5.605  23.805  -21.972 1.00 16.93 ? ? ? ? ? ? 65   PHE A CG  1 
ATOM   520  C  CD1 . PHE A 1 67  ? -4.958  23.878  -23.196 1.00 17.59 ? ? ? ? ? ? 65   PHE A CD1 1 
ATOM   521  C  CD2 . PHE A 1 67  ? -5.535  22.623  -21.242 1.00 18.69 ? ? ? ? ? ? 65   PHE A CD2 1 
ATOM   522  C  CE1 . PHE A 1 67  ? -4.233  22.801  -23.680 1.00 23.59 ? ? ? ? ? ? 65   PHE A CE1 1 
ATOM   523  C  CE2 . PHE A 1 67  ? -4.809  21.535  -21.717 1.00 18.70 ? ? ? ? ? ? 65   PHE A CE2 1 
ATOM   524  C  CZ  . PHE A 1 67  ? -4.159  21.622  -22.937 1.00 25.45 ? ? ? ? ? ? 65   PHE A CZ  1 
ATOM   525  N  N   . LYS A 1 68  ? -9.086  23.409  -21.027 1.00 15.03 ? ? ? ? ? ? 66   LYS A N   1 
ATOM   526  C  CA  . LYS A 1 68  ? -9.747  22.104  -20.976 1.00 12.97 ? ? ? ? ? ? 66   LYS A CA  1 
ATOM   527  C  C   . LYS A 1 68  ? -10.880 22.028  -21.993 1.00 15.45 ? ? ? ? ? ? 66   LYS A C   1 
ATOM   528  O  O   . LYS A 1 68  ? -11.058 21.000  -22.660 1.00 13.15 ? ? ? ? ? ? 66   LYS A O   1 
ATOM   529  C  CB  . LYS A 1 68  ? -10.259 21.812  -19.563 1.00 12.93 ? ? ? ? ? ? 66   LYS A CB  1 
ATOM   530  C  CG  . LYS A 1 68  ? -9.193  21.938  -18.484 1.00 11.82 ? ? ? ? ? ? 66   LYS A CG  1 
ATOM   531  C  CD  . LYS A 1 68  ? -9.723  21.489  -17.123 1.00 13.68 ? ? ? ? ? ? 66   LYS A CD  1 
ATOM   532  C  CE  . LYS A 1 68  ? -10.560 22.567  -16.459 1.00 13.18 ? ? ? ? ? ? 66   LYS A CE  1 
ATOM   533  N  NZ  . LYS A 1 68  ? -10.857 22.233  -15.026 1.00 11.25 ? ? ? ? ? ? 66   LYS A NZ  1 
ATOM   534  N  N   . SER A 1 69  ? -11.631 23.122  -22.148 1.00 13.05 ? ? ? ? ? ? 67   SER A N   1 
ATOM   535  C  CA  . SER A 1 69  ? -12.719 23.201  -23.118 1.00 13.53 ? ? ? ? ? ? 67   SER A CA  1 
ATOM   536  C  C   . SER A 1 69  ? -12.238 23.086  -24.554 1.00 11.43 ? ? ? ? ? ? 67   SER A C   1 
ATOM   537  O  O   . SER A 1 69  ? -13.040 22.757  -25.433 1.00 14.88 ? ? ? ? ? ? 67   SER A O   1 
ATOM   538  C  CB  . SER A 1 69  ? -13.481 24.529  -22.955 1.00 16.35 ? ? ? ? ? ? 67   SER A CB  1 
ATOM   539  O  OG  . SER A 1 69  ? -14.113 24.571  -21.699 1.00 31.58 ? ? ? ? ? ? 67   SER A OG  1 
ATOM   540  N  N   . SER A 1 70  ? -10.961 23.355  -24.822 1.00 13.84 ? ? ? ? ? ? 68   SER A N   1 
ATOM   541  C  CA  . SER A 1 70  ? -10.458 23.197  -26.182 1.00 15.31 ? ? ? ? ? ? 68   SER A CA  1 
ATOM   542  C  C   . SER A 1 70  ? -10.246 21.736  -26.563 1.00 13.86 ? ? ? ? ? ? 68   SER A C   1 
ATOM   543  O  O   . SER A 1 70  ? -10.084 21.439  -27.750 1.00 12.42 ? ? ? ? ? ? 68   SER A O   1 
ATOM   544  C  CB  . SER A 1 70  ? -9.152  23.979  -26.361 1.00 13.53 ? ? ? ? ? ? 68   SER A CB  1 
ATOM   545  O  OG  . SER A 1 70  ? -8.051  23.293  -25.778 1.00 14.65 ? ? ? ? ? ? 68   SER A OG  1 
ATOM   546  N  N   . CYS A 1 71  ? -10.270 20.813  -25.600 1.00 11.37 ? ? ? ? ? ? 69   CYS A N   1 
ATOM   547  C  CA  . CYS A 1 71  ? -9.975  19.404  -25.884 1.00 13.48 ? ? ? ? ? ? 69   CYS A CA  1 
ATOM   548  C  C   . CYS A 1 71  ? -11.246 18.683  -26.331 1.00 13.51 ? ? ? ? ? ? 69   CYS A C   1 
ATOM   549  O  O   . CYS A 1 71  ? -11.826 17.860  -25.622 1.00 11.64 ? ? ? ? ? ? 69   CYS A O   1 
ATOM   550  C  CB  . CYS A 1 71  ? -9.341  18.733  -24.670 1.00 12.06 ? ? ? ? ? ? 69   CYS A CB  1 
ATOM   551  S  SG  . CYS A 1 71  ? -7.795  19.501  -24.110 1.00 16.32 ? ? ? ? ? ? 69   CYS A SG  1 
ATOM   552  N  N   . VAL A 1 72  ? -11.662 19.001  -27.560 1.00 9.69  ? ? ? ? ? ? 70   VAL A N   1 
ATOM   553  C  CA  . VAL A 1 72  ? -12.868 18.454  -28.164 1.00 14.28 ? ? ? ? ? ? 70   VAL A CA  1 
ATOM   554  C  C   . VAL A 1 72  ? -12.564 18.145  -29.623 1.00 12.83 ? ? ? ? ? ? 70   VAL A C   1 
ATOM   555  O  O   . VAL A 1 72  ? -11.644 18.706  -30.221 1.00 13.66 ? ? ? ? ? ? 70   VAL A O   1 
ATOM   556  C  CB  . VAL A 1 72  ? -14.076 19.419  -28.064 1.00 15.23 ? ? ? ? ? ? 70   VAL A CB  1 
ATOM   557  C  CG1 . VAL A 1 72  ? -14.530 19.571  -26.609 1.00 17.71 ? ? ? ? ? ? 70   VAL A CG1 1 
ATOM   558  C  CG2 . VAL A 1 72  ? -13.722 20.769  -28.651 1.00 19.49 ? ? ? ? ? ? 70   VAL A CG2 1 
ATOM   559  N  N   . SER A 1 73  ? -13.360 17.247  -30.195 1.00 13.13 ? ? ? ? ? ? 71   SER A N   1 
ATOM   560  C  CA  . SER A 1 73  ? -13.216 16.822  -31.580 1.00 13.09 ? ? ? ? ? ? 71   SER A CA  1 
ATOM   561  C  C   . SER A 1 73  ? -14.583 16.800  -32.244 1.00 14.51 ? ? ? ? ? ? 71   SER A C   1 
ATOM   562  O  O   . SER A 1 73  ? -15.589 16.503  -31.598 1.00 18.58 ? ? ? ? ? ? 71   SER A O   1 
ATOM   563  C  CB  . SER A 1 73  ? -12.567 15.421  -31.666 1.00 14.29 ? ? ? ? ? ? 71   SER A CB  1 
ATOM   564  O  OG  . SER A 1 73  ? -12.883 14.797  -32.896 1.00 13.32 ? ? ? ? ? ? 71   SER A OG  1 
ATOM   565  N  N   . ASP A 1 74  ? -14.633 17.112  -33.541 1.00 11.88 ? ? ? ? ? ? 72   ASP A N   1 
ATOM   566  C  CA  . ASP A 1 74  ? -15.890 16.949  -34.255 1.00 14.88 ? ? ? ? ? ? 72   ASP A CA  1 
ATOM   567  C  C   . ASP A 1 74  ? -15.995 15.593  -34.950 1.00 14.29 ? ? ? ? ? ? 72   ASP A C   1 
ATOM   568  O  O   . ASP A 1 74  ? -16.985 15.345  -35.643 1.00 13.71 ? ? ? ? ? ? 72   ASP A O   1 
ATOM   569  C  CB  . ASP A 1 74  ? -16.118 18.094  -35.258 1.00 16.88 ? ? ? ? ? ? 72   ASP A CB  1 
ATOM   570  C  CG  . ASP A 1 74  ? -15.083 18.144  -36.374 1.00 22.21 ? ? ? ? ? ? 72   ASP A CG  1 
ATOM   571  O  OD1 . ASP A 1 74  ? -14.223 17.246  -36.496 1.00 20.61 ? ? ? ? ? ? 72   ASP A OD1 1 
ATOM   572  O  OD2 . ASP A 1 74  ? -15.141 19.122  -37.150 1.00 28.80 ? ? ? ? ? ? 72   ASP A OD2 1 
ATOM   573  N  N   . LEU A 1 75  ? -15.013 14.714  -34.757 1.00 10.55 ? ? ? ? ? ? 73   LEU A N   1 
ATOM   574  C  CA  . LEU A 1 75  ? -15.031 13.358  -35.299 1.00 12.21 ? ? ? ? ? ? 73   LEU A CA  1 
ATOM   575  C  C   . LEU A 1 75  ? -15.376 12.304  -34.255 1.00 14.49 ? ? ? ? ? ? 73   LEU A C   1 
ATOM   576  O  O   . LEU A 1 75  ? -16.091 11.349  -34.562 1.00 12.13 ? ? ? ? ? ? 73   LEU A O   1 
ATOM   577  C  CB  . LEU A 1 75  ? -13.670 13.009  -35.907 1.00 12.54 ? ? ? ? ? ? 73   LEU A CB  1 
ATOM   578  C  CG  . LEU A 1 75  ? -13.247 13.881  -37.092 1.00 17.65 ? ? ? ? ? ? 73   LEU A CG  1 
ATOM   579  C  CD1 . LEU A 1 75  ? -11.836 13.541  -37.543 1.00 15.05 ? ? ? ? ? ? 73   LEU A CD1 1 
ATOM   580  C  CD2 . LEU A 1 75  ? -14.242 13.707  -38.230 1.00 17.12 ? ? ? ? ? ? 73   LEU A CD2 1 
ATOM   581  N  N   . THR A 1 76  ? -14.861 12.446  -33.038 1.00 11.66 ? ? ? ? ? ? 74   THR A N   1 
ATOM   582  C  CA  . THR A 1 76  ? -15.090 11.495  -31.958 1.00 10.38 ? ? ? ? ? ? 74   THR A CA  1 
ATOM   583  C  C   . THR A 1 76  ? -15.625 12.231  -30.737 1.00 11.01 ? ? ? ? ? ? 74   THR A C   1 
ATOM   584  O  O   . THR A 1 76  ? -15.428 13.440  -30.576 1.00 12.09 ? ? ? ? ? ? 74   THR A O   1 
ATOM   585  C  CB  . THR A 1 76  ? -13.799 10.750  -31.590 1.00 11.22 ? ? ? ? ? ? 74   THR A CB  1 
ATOM   586  O  OG1 . THR A 1 76  ? -14.028 9.931   -30.431 1.00 11.63 ? ? ? ? ? ? 74   THR A OG1 1 
ATOM   587  C  CG2 . THR A 1 76  ? -12.679 11.743  -31.285 1.00 10.72 ? ? ? ? ? ? 74   THR A CG2 1 
ATOM   588  N  N   . TYR A 1 77  ? -16.338 11.495  -29.889 1.00 12.37 ? ? ? ? ? ? 75   TYR A N   1 
ATOM   589  C  CA  . TYR A 1 77  ? -16.833 12.057  -28.642 1.00 14.01 ? ? ? ? ? ? 75   TYR A CA  1 
ATOM   590  C  C   . TYR A 1 77  ? -15.760 12.112  -27.566 1.00 13.42 ? ? ? ? ? ? 75   TYR A C   1 
ATOM   591  O  O   . TYR A 1 77  ? -16.026 12.639  -26.482 1.00 12.70 ? ? ? ? ? ? 75   TYR A O   1 
ATOM   592  C  CB  . TYR A 1 77  ? -18.058 11.265  -28.150 1.00 11.43 ? ? ? ? ? ? 75   TYR A CB  1 
ATOM   593  C  CG  . TYR A 1 77  ? -19.306 11.635  -28.919 1.00 10.68 ? ? ? ? ? ? 75   TYR A CG  1 
ATOM   594  C  CD1 . TYR A 1 77  ? -20.030 12.778  -28.590 1.00 11.36 ? ? ? ? ? ? 75   TYR A CD1 1 
ATOM   595  C  CD2 . TYR A 1 77  ? -19.724 10.881  -30.014 1.00 9.23  ? ? ? ? ? ? 75   TYR A CD2 1 
ATOM   596  C  CE1 . TYR A 1 77  ? -21.160 13.141  -29.305 1.00 13.28 ? ? ? ? ? ? 75   TYR A CE1 1 
ATOM   597  C  CE2 . TYR A 1 77  ? -20.853 11.238  -30.739 1.00 14.06 ? ? ? ? ? ? 75   TYR A CE2 1 
ATOM   598  C  CZ  . TYR A 1 77  ? -21.561 12.370  -30.384 1.00 12.60 ? ? ? ? ? ? 75   TYR A CZ  1 
ATOM   599  O  OH  . TYR A 1 77  ? -22.676 12.732  -31.100 1.00 13.65 ? ? ? ? ? ? 75   TYR A OH  1 
ATOM   600  N  N   . SER A 1 78  ? -14.553 11.624  -27.854 1.00 12.68 ? ? ? ? ? ? 76   SER A N   1 
ATOM   601  C  CA  . SER A 1 78  ? -13.460 11.713  -26.896 1.00 12.23 ? ? ? ? ? ? 76   SER A CA  1 
ATOM   602  C  C   . SER A 1 78  ? -13.172 13.164  -26.525 1.00 14.99 ? ? ? ? ? ? 76   SER A C   1 
ATOM   603  O  O   . SER A 1 78  ? -13.268 14.082  -27.348 1.00 11.29 ? ? ? ? ? ? 76   SER A O   1 
ATOM   604  C  CB  . SER A 1 78  ? -12.185 11.081  -27.458 1.00 12.11 ? ? ? ? ? ? 76   SER A CB  1 
ATOM   605  O  OG  . SER A 1 78  ? -12.347 9.696   -27.709 1.00 13.10 ? ? ? ? ? ? 76   SER A OG  1 
ATOM   606  N  N   . GLY A 1 79  ? -12.778 13.356  -25.280 1.00 9.72  ? ? ? ? ? ? 77   GLY A N   1 
ATOM   607  C  CA  . GLY A 1 79  ? -12.350 14.660  -24.835 1.00 10.67 ? ? ? ? ? ? 77   GLY A CA  1 
ATOM   608  C  C   . GLY A 1 79  ? -13.191 15.207  -23.701 1.00 11.32 ? ? ? ? ? ? 77   GLY A C   1 
ATOM   609  O  O   . GLY A 1 79  ? -13.894 14.461  -23.007 1.00 9.44  ? ? ? ? ? ? 77   GLY A O   1 
ATOM   610  N  N   . TYR A 1 80  ? -13.166 16.526  -23.545 1.00 8.72  ? ? ? ? ? ? 78   TYR A N   1 
ATOM   611  C  CA  . TYR A 1 80  ? -13.611 17.158  -22.309 1.00 11.99 ? ? ? ? ? ? 78   TYR A CA  1 
ATOM   612  C  C   . TYR A 1 80  ? -15.106 17.439  -22.300 1.00 13.97 ? ? ? ? ? ? 78   TYR A C   1 
ATOM   613  O  O   . TYR A 1 80  ? -15.680 17.895  -23.294 1.00 13.94 ? ? ? ? ? ? 78   TYR A O   1 
ATOM   614  C  CB  . TYR A 1 80  ? -12.857 18.464  -22.089 1.00 8.94  ? ? ? ? ? ? 78   TYR A CB  1 
ATOM   615  C  CG  . TYR A 1 80  ? -13.149 19.128  -20.760 1.00 10.78 ? ? ? ? ? ? 78   TYR A CG  1 
ATOM   616  C  CD1 . TYR A 1 80  ? -12.700 18.566  -19.577 1.00 8.45  ? ? ? ? ? ? 78   TYR A CD1 1 
ATOM   617  C  CD2 . TYR A 1 80  ? -13.865 20.326  -20.698 1.00 11.65 ? ? ? ? ? ? 78   TYR A CD2 1 
ATOM   618  C  CE1 . TYR A 1 80  ? -12.949 19.175  -18.353 1.00 14.20 ? ? ? ? ? ? 78   TYR A CE1 1 
ATOM   619  C  CE2 . TYR A 1 80  ? -14.127 20.937  -19.482 1.00 10.33 ? ? ? ? ? ? 78   TYR A CE2 1 
ATOM   620  C  CZ  . TYR A 1 80  ? -13.657 20.357  -18.312 1.00 11.18 ? ? ? ? ? ? 78   TYR A CZ  1 
ATOM   621  O  OH  . TYR A 1 80  ? -13.902 20.959  -17.102 1.00 10.98 ? ? ? ? ? ? 78   TYR A OH  1 
ATOM   622  N  N   . VAL A 1 81  ? -15.718 17.209  -21.144 1.00 10.16 ? ? ? ? ? ? 79   VAL A N   1 
ATOM   623  C  CA  . VAL A 1 81  ? -17.095 17.604  -20.872 1.00 14.39 ? ? ? ? ? ? 79   VAL A CA  1 
ATOM   624  C  C   . VAL A 1 81  ? -17.086 18.383  -19.568 1.00 11.61 ? ? ? ? ? ? 79   VAL A C   1 
ATOM   625  O  O   . VAL A 1 81  ? -16.672 17.852  -18.530 1.00 10.74 ? ? ? ? ? ? 79   VAL A O   1 
ATOM   626  C  CB  . VAL A 1 81  ? -18.043 16.398  -20.769 1.00 18.39 ? ? ? ? ? ? 79   VAL A CB  1 
ATOM   627  C  CG1 . VAL A 1 81  ? -19.380 16.831  -20.179 1.00 19.80 ? ? ? ? ? ? 79   VAL A CG1 1 
ATOM   628  C  CG2 . VAL A 1 81  ? -18.250 15.776  -22.134 1.00 25.71 ? ? ? ? ? ? 79   VAL A CG2 1 
ATOM   629  N  N   . ALA A 1 82  ? -17.548 19.628  -19.616 1.00 10.04 ? ? ? ? ? ? 80   ALA A N   1 
ATOM   630  C  CA  . ALA A 1 82  ? -17.543 20.465  -18.425 1.00 16.28 ? ? ? ? ? ? 80   ALA A CA  1 
ATOM   631  C  C   . ALA A 1 82  ? -18.617 20.012  -17.436 1.00 12.71 ? ? ? ? ? ? 80   ALA A C   1 
ATOM   632  O  O   . ALA A 1 82  ? -19.614 19.386  -17.797 1.00 12.56 ? ? ? ? ? ? 80   ALA A O   1 
ATOM   633  C  CB  . ALA A 1 82  ? -17.762 21.935  -18.807 1.00 13.30 ? ? ? ? ? ? 80   ALA A CB  1 
ATOM   634  N  N   . SER A 1 83  ? -18.407 20.349  -16.167 1.00 12.79 ? ? ? ? ? ? 81   SER A N   1 
ATOM   635  C  CA  . SER A 1 83  ? -19.395 20.021  -15.150 1.00 14.44 ? ? ? ? ? ? 81   SER A CA  1 
ATOM   636  C  C   . SER A 1 83  ? -20.710 20.743  -15.427 1.00 12.71 ? ? ? ? ? ? 81   SER A C   1 
ATOM   637  O  O   . SER A 1 83  ? -20.743 21.830  -16.019 1.00 11.67 ? ? ? ? ? ? 81   SER A O   1 
ATOM   638  C  CB  . SER A 1 83  ? -18.876 20.393  -13.759 1.00 14.21 ? ? ? ? ? ? 81   SER A CB  1 
ATOM   639  O  OG  . SER A 1 83  ? -18.941 21.792  -13.553 1.00 26.49 ? ? ? ? ? ? 81   SER A OG  1 
ATOM   640  N  N   . GLY A 1 84  ? -21.804 20.129  -14.984 1.00 11.90 ? ? ? ? ? ? 82   GLY A N   1 
ATOM   641  C  CA  . GLY A 1 84  ? -23.118 20.717  -15.164 1.00 20.33 ? ? ? ? ? ? 82   GLY A CA  1 
ATOM   642  C  C   . GLY A 1 84  ? -23.701 20.595  -16.555 1.00 19.13 ? ? ? ? ? ? 82   GLY A C   1 
ATOM   643  O  O   . GLY A 1 84  ? -24.733 21.218  -16.829 1.00 27.50 ? ? ? ? ? ? 82   GLY A O   1 
ATOM   644  N  N   . GLU A 1 85  ? -23.067 19.831  -17.447 1.00 16.17 ? ? ? ? ? ? 83   GLU A N   1 
ATOM   645  C  CA  . GLU A 1 85  ? -23.591 19.574  -18.786 1.00 21.80 ? ? ? ? ? ? 83   GLU A CA  1 
ATOM   646  C  C   . GLU A 1 85  ? -24.392 18.277  -18.834 1.00 19.47 ? ? ? ? ? ? 83   GLU A C   1 
ATOM   647  O  O   . GLU A 1 85  ? -25.507 18.242  -19.359 1.00 22.74 ? ? ? ? ? ? 83   GLU A O   1 
ATOM   648  C  CB  . GLU A 1 85  ? -22.443 19.495  -19.795 1.00 24.10 ? ? ? ? ? ? 83   GLU A CB  1 
ATOM   649  C  CG  . GLU A 1 85  ? -21.565 20.719  -19.849 1.00 36.54 ? ? ? ? ? ? 83   GLU A CG  1 
ATOM   650  C  CD  . GLU A 1 85  ? -22.078 21.757  -20.818 1.00 54.15 ? ? ? ? ? ? 83   GLU A CD  1 
ATOM   651  O  OE1 . GLU A 1 85  ? -21.674 22.931  -20.688 1.00 51.32 ? ? ? ? ? ? 83   GLU A OE1 1 
ATOM   652  O  OE2 . GLU A 1 85  ? -22.880 21.396  -21.708 1.00 58.92 ? ? ? ? ? ? 83   GLU A OE2 1 
ATOM   653  N  N   . GLU A 1 86  ? -23.817 17.201  -18.312 1.00 21.11 ? ? ? ? ? ? 84   GLU A N   1 
ATOM   654  C  CA  . GLU A 1 86  ? -24.524 15.933  -18.246 1.00 20.09 ? ? ? ? ? ? 84   GLU A CA  1 
ATOM   655  C  C   . GLU A 1 86  ? -25.719 16.042  -17.308 1.00 20.10 ? ? ? ? ? ? 84   GLU A C   1 
ATOM   656  O  O   . GLU A 1 86  ? -25.655 16.690  -16.261 1.00 18.58 ? ? ? ? ? ? 84   GLU A O   1 
ATOM   657  C  CB  . GLU A 1 86  ? -23.573 14.835  -17.775 1.00 23.17 ? ? ? ? ? ? 84   GLU A CB  1 
ATOM   658  C  CG  . GLU A 1 86  ? -22.494 14.512  -18.781 1.00 19.19 ? ? ? ? ? ? 84   GLU A CG  1 
ATOM   659  C  CD  . GLU A 1 86  ? -21.590 13.392  -18.327 1.00 24.16 ? ? ? ? ? ? 84   GLU A CD  1 
ATOM   660  O  OE1 . GLU A 1 86  ? -21.486 13.161  -17.102 1.00 24.37 ? ? ? ? ? ? 84   GLU A OE1 1 
ATOM   661  O  OE2 . GLU A 1 86  ? -20.973 12.747  -19.197 1.00 27.84 ? ? ? ? ? ? 84   GLU A OE2 1 
ATOM   662  N  N   . VAL A 1 87  ? -26.818 15.404  -17.691 1.00 18.95 ? ? ? ? ? ? 85   VAL A N   1 
ATOM   663  C  CA  . VAL A 1 87  ? -28.044 15.431  -16.912 1.00 17.09 ? ? ? ? ? ? 85   VAL A CA  1 
ATOM   664  C  C   . VAL A 1 87  ? -28.477 13.997  -16.650 1.00 17.15 ? ? ? ? ? ? 85   VAL A C   1 
ATOM   665  O  O   . VAL A 1 87  ? -28.471 13.160  -17.557 1.00 20.40 ? ? ? ? ? ? 85   VAL A O   1 
ATOM   666  C  CB  . VAL A 1 87  ? -29.151 16.222  -17.640 1.00 22.81 ? ? ? ? ? ? 85   VAL A CB  1 
ATOM   667  C  CG1 . VAL A 1 87  ? -30.475 16.099  -16.900 1.00 26.47 ? ? ? ? ? ? 85   VAL A CG1 1 
ATOM   668  C  CG2 . VAL A 1 87  ? -28.746 17.695  -17.784 1.00 22.67 ? ? ? ? ? ? 85   VAL A CG2 1 
ATOM   669  N  N   . THR A 1 88  ? -28.849 13.714  -15.407 1.00 17.93 ? ? ? ? ? ? 86   THR A N   1 
ATOM   670  C  CA  . THR A 1 88  ? -29.374 12.408  -15.036 1.00 17.89 ? ? ? ? ? ? 86   THR A CA  1 
ATOM   671  C  C   . THR A 1 88  ? -30.732 12.614  -14.394 1.00 17.95 ? ? ? ? ? ? 86   THR A C   1 
ATOM   672  O  O   . THR A 1 88  ? -30.834 13.292  -13.366 1.00 18.15 ? ? ? ? ? ? 86   THR A O   1 
ATOM   673  C  CB  . THR A 1 88  ? -28.427 11.683  -14.080 1.00 17.55 ? ? ? ? ? ? 86   THR A CB  1 
ATOM   674  O  OG1 . THR A 1 88  ? -27.194 11.435  -14.760 1.00 22.44 ? ? ? ? ? ? 86   THR A OG1 1 
ATOM   675  C  CG2 . THR A 1 88  ? -29.037 10.355  -13.630 1.00 19.32 ? ? ? ? ? ? 86   THR A CG2 1 
ATOM   676  N  N   . ALA A 1 89  ? -31.769 12.040  -15.008 1.00 22.13 ? ? ? ? ? ? 87   ALA A N   1 
ATOM   677  C  CA  . ALA A 1 89  ? -33.131 12.122  -14.486 1.00 20.06 ? ? ? ? ? ? 87   ALA A CA  1 
ATOM   678  C  C   . ALA A 1 89  ? -33.533 13.571  -14.209 1.00 21.27 ? ? ? ? ? ? 87   ALA A C   1 
ATOM   679  O  O   . ALA A 1 89  ? -34.066 13.907  -13.147 1.00 20.00 ? ? ? ? ? ? 87   ALA A O   1 
ATOM   680  C  CB  . ALA A 1 89  ? -33.286 11.257  -13.232 1.00 24.12 ? ? ? ? ? ? 87   ALA A CB  1 
ATOM   681  N  N   . GLY A 1 90  ? -33.245 14.447  -15.169 1.00 19.96 ? ? ? ? ? ? 88   GLY A N   1 
ATOM   682  C  CA  . GLY A 1 90  ? -33.670 15.827  -15.100 1.00 21.92 ? ? ? ? ? ? 88   GLY A CA  1 
ATOM   683  C  C   . GLY A 1 90  ? -32.809 16.759  -14.273 1.00 24.71 ? ? ? ? ? ? 88   GLY A C   1 
ATOM   684  O  O   . GLY A 1 90  ? -33.117 17.954  -14.213 1.00 29.84 ? ? ? ? ? ? 88   GLY A O   1 
ATOM   685  N  N   . LYS A 1 91  ? -31.752 16.272  -13.626 1.00 17.61 ? ? ? ? ? ? 89   LYS A N   1 
ATOM   686  C  CA  . LYS A 1 91  ? -30.891 17.138  -12.832 1.00 17.07 ? ? ? ? ? ? 89   LYS A CA  1 
ATOM   687  C  C   . LYS A 1 91  ? -29.472 17.137  -13.389 1.00 22.05 ? ? ? ? ? ? 89   LYS A C   1 
ATOM   688  O  O   . LYS A 1 91  ? -28.921 16.062  -13.672 1.00 20.59 ? ? ? ? ? ? 89   LYS A O   1 
ATOM   689  C  CB  . LYS A 1 91  ? -30.856 16.701  -11.371 1.00 21.79 ? ? ? ? ? ? 89   LYS A CB  1 
ATOM   690  C  CG  . LYS A 1 91  ? -32.184 16.766  -10.631 1.00 25.62 ? ? ? ? ? ? 89   LYS A CG  1 
ATOM   691  C  CD  . LYS A 1 91  ? -32.029 16.225  -9.208  1.00 35.45 ? ? ? ? ? ? 89   LYS A CD  1 
ATOM   692  C  CE  . LYS A 1 91  ? -33.313 16.395  -8.393  1.00 37.30 ? ? ? ? ? ? 89   LYS A CE  1 
ATOM   693  N  NZ  . LYS A 1 91  ? -34.308 15.318  -8.685  1.00 41.19 ? ? ? ? ? ? 89   LYS A NZ  1 
ATOM   694  N  N   . PRO A 1 92  ? -28.837 18.302  -13.520 1.00 20.06 ? ? ? ? ? ? 90   PRO A N   1 
ATOM   695  C  CA  . PRO A 1 92  ? -27.439 18.339  -13.967 1.00 14.57 ? ? ? ? ? ? 90   PRO A CA  1 
ATOM   696  C  C   . PRO A 1 92  ? -26.510 17.724  -12.929 1.00 15.90 ? ? ? ? ? ? 90   PRO A C   1 
ATOM   697  O  O   . PRO A 1 92  ? -26.729 17.837  -11.719 1.00 12.71 ? ? ? ? ? ? 90   PRO A O   1 
ATOM   698  C  CB  . PRO A 1 92  ? -27.155 19.839  -14.135 1.00 18.79 ? ? ? ? ? ? 90   PRO A CB  1 
ATOM   699  C  CG  . PRO A 1 92  ? -28.456 20.549  -13.840 1.00 24.68 ? ? ? ? ? ? 90   PRO A CG  1 
ATOM   700  C  CD  . PRO A 1 92  ? -29.294 19.619  -13.046 1.00 22.66 ? ? ? ? ? ? 90   PRO A CD  1 
ATOM   701  N  N   . ASP A 1 93  ? -25.458 17.074  -13.425 1.00 17.50 ? ? ? ? ? ? 91   ASP A N   1 
ATOM   702  C  CA  . ASP A 1 93  ? -24.483 16.359  -12.613 1.00 14.46 ? ? ? ? ? ? 91   ASP A CA  1 
ATOM   703  C  C   . ASP A 1 93  ? -23.240 17.212  -12.403 1.00 11.64 ? ? ? ? ? ? 91   ASP A C   1 
ATOM   704  O  O   . ASP A 1 93  ? -22.925 18.092  -13.200 1.00 14.07 ? ? ? ? ? ? 91   ASP A O   1 
ATOM   705  C  CB  . ASP A 1 93  ? -24.091 15.036  -13.279 1.00 14.64 ? ? ? ? ? ? 91   ASP A CB  1 
ATOM   706  C  CG  . ASP A 1 93  ? -25.264 14.082  -13.430 1.00 20.95 ? ? ? ? ? ? 91   ASP A CG  1 
ATOM   707  O  OD1 . ASP A 1 93  ? -26.098 14.002  -12.499 1.00 20.34 ? ? ? ? ? ? 91   ASP A OD1 1 
ATOM   708  O  OD2 . ASP A 1 93  ? -25.342 13.403  -14.481 1.00 20.53 ? ? ? ? ? ? 91   ASP A OD2 1 
ATOM   709  N  N   . PHE A 1 94  ? -22.505 16.908  -11.336 1.00 11.96 ? ? ? ? ? ? 92   PHE A N   1 
ATOM   710  C  CA  . PHE A 1 94  ? -21.391 17.763  -10.924 1.00 12.04 ? ? ? ? ? ? 92   PHE A CA  1 
ATOM   711  C  C   . PHE A 1 94  ? -20.005 17.473  -11.517 1.00 13.24 ? ? ? ? ? ? 92   PHE A C   1 
ATOM   712  O  O   . PHE A 1 94  ? -19.181 18.394  -11.555 1.00 8.78  ? ? ? ? ? ? 92   PHE A O   1 
ATOM   713  C  CB  . PHE A 1 94  ? -21.267 17.730  -9.393  1.00 9.79  ? ? ? ? ? ? 92   PHE A CB  1 
ATOM   714  C  CG  . PHE A 1 94  ? -22.300 18.565  -8.683  1.00 9.92  ? ? ? ? ? ? 92   PHE A CG  1 
ATOM   715  C  CD1 . PHE A 1 94  ? -23.562 18.063  -8.442  1.00 14.36 ? ? ? ? ? ? 92   PHE A CD1 1 
ATOM   716  C  CD2 . PHE A 1 94  ? -22.009 19.851  -8.265  1.00 13.74 ? ? ? ? ? ? 92   PHE A CD2 1 
ATOM   717  C  CE1 . PHE A 1 94  ? -24.516 18.824  -7.787  1.00 15.00 ? ? ? ? ? ? 92   PHE A CE1 1 
ATOM   718  C  CE2 . PHE A 1 94  ? -22.964 20.618  -7.605  1.00 13.75 ? ? ? ? ? ? 92   PHE A CE2 1 
ATOM   719  C  CZ  . PHE A 1 94  ? -24.214 20.101  -7.373  1.00 14.90 ? ? ? ? ? ? 92   PHE A CZ  1 
ATOM   720  N  N   . PRO A 1 95  ? -19.648 16.255  -11.934 1.00 13.59 ? ? ? ? ? ? 93   PRO A N   1 
ATOM   721  C  CA  . PRO A 1 95  ? -18.245 16.030  -12.296 1.00 10.25 ? ? ? ? ? ? 93   PRO A CA  1 
ATOM   722  C  C   . PRO A 1 95  ? -17.911 16.609  -13.663 1.00 11.77 ? ? ? ? ? ? 93   PRO A C   1 
ATOM   723  O  O   . PRO A 1 95  ? -18.764 16.723  -14.546 1.00 11.27 ? ? ? ? ? ? 93   PRO A O   1 
ATOM   724  C  CB  . PRO A 1 95  ? -18.121 14.498  -12.297 1.00 12.10 ? ? ? ? ? ? 93   PRO A CB  1 
ATOM   725  C  CG  . PRO A 1 95  ? -19.460 14.043  -12.761 1.00 14.83 ? ? ? ? ? ? 93   PRO A CG  1 
ATOM   726  C  CD  . PRO A 1 95  ? -20.442 15.018  -12.114 1.00 12.01 ? ? ? ? ? ? 93   PRO A CD  1 
ATOM   727  N  N   . GLU A 1 96  ? -16.653 17.003  -13.819 1.00 10.72 ? ? ? ? ? ? 94   GLU A N   1 
ATOM   728  C  CA  . GLU A 1 96  ? -16.084 17.225  -15.143 1.00 10.80 ? ? ? ? ? ? 94   GLU A CA  1 
ATOM   729  C  C   . GLU A 1 96  ? -15.445 15.927  -15.612 1.00 10.65 ? ? ? ? ? ? 94   GLU A C   1 
ATOM   730  O  O   . GLU A 1 96  ? -14.982 15.121  -14.804 1.00 9.66  ? ? ? ? ? ? 94   GLU A O   1 
ATOM   731  C  CB  . GLU A 1 96  ? -15.055 18.358  -15.136 1.00 10.89 ? ? ? ? ? ? 94   GLU A CB  1 
ATOM   732  C  CG  . GLU A 1 96  ? -13.854 18.113  -14.236 1.00 18.56 ? ? ? ? ? ? 94   GLU A CG  1 
ATOM   733  C  CD  . GLU A 1 96  ? -12.975 19.349  -14.069 1.00 17.66 ? ? ? ? ? ? 94   GLU A CD  1 
ATOM   734  O  OE1 . GLU A 1 96  ? -12.619 19.984  -15.086 1.00 17.25 ? ? ? ? ? ? 94   GLU A OE1 1 
ATOM   735  O  OE2 . GLU A 1 96  ? -12.639 19.680  -12.916 1.00 20.57 ? ? ? ? ? ? 94   GLU A OE2 1 
ATOM   736  N  N   . ILE A 1 97  ? -15.475 15.695  -16.920 1.00 9.09  ? ? ? ? ? ? 95   ILE A N   1 
ATOM   737  C  CA  . ILE A 1 97  ? -15.119 14.386  -17.459 1.00 8.89  ? ? ? ? ? ? 95   ILE A CA  1 
ATOM   738  C  C   . ILE A 1 97  ? -14.222 14.568  -18.673 1.00 12.74 ? ? ? ? ? ? 95   ILE A C   1 
ATOM   739  O  O   . ILE A 1 97  ? -14.400 15.507  -19.460 1.00 10.01 ? ? ? ? ? ? 95   ILE A O   1 
ATOM   740  C  CB  . ILE A 1 97  ? -16.369 13.561  -17.837 1.00 16.18 ? ? ? ? ? ? 95   ILE A CB  1 
ATOM   741  C  CG1 . ILE A 1 97  ? -17.317 13.445  -16.639 1.00 14.88 ? ? ? ? ? ? 95   ILE A CG1 1 
ATOM   742  C  CG2 . ILE A 1 97  ? -15.972 12.160  -18.327 1.00 16.54 ? ? ? ? ? ? 95   ILE A CG2 1 
ATOM   743  C  CD1 . ILE A 1 97  ? -18.582 14.203  -16.840 1.00 20.35 ? ? ? ? ? ? 95   ILE A CD1 1 
ATOM   744  N  N   . PHE A 1 98  ? -13.242 13.680  -18.801 1.00 11.03 ? ? ? ? ? ? 96   PHE A N   1 
ATOM   745  C  CA  . PHE A 1 98  ? -12.533 13.449  -20.054 1.00 8.18  ? ? ? ? ? ? 96   PHE A CA  1 
ATOM   746  C  C   . PHE A 1 98  ? -12.843 12.023  -20.504 1.00 11.53 ? ? ? ? ? ? 96   PHE A C   1 
ATOM   747  O  O   . PHE A 1 98  ? -12.516 11.063  -19.800 1.00 11.87 ? ? ? ? ? ? 96   PHE A O   1 
ATOM   748  C  CB  . PHE A 1 98  ? -11.025 13.652  -19.890 1.00 9.48  ? ? ? ? ? ? 96   PHE A CB  1 
ATOM   749  C  CG  . PHE A 1 98  ? -10.298 13.830  -21.199 1.00 10.45 ? ? ? ? ? ? 96   PHE A CG  1 
ATOM   750  C  CD1 . PHE A 1 98  ? -9.916  15.094  -21.616 1.00 10.87 ? ? ? ? ? ? 96   PHE A CD1 1 
ATOM   751  C  CD2 . PHE A 1 98  ? -10.012 12.739  -22.011 1.00 9.74  ? ? ? ? ? ? 96   PHE A CD2 1 
ATOM   752  C  CE1 . PHE A 1 98  ? -9.259  15.278  -22.832 1.00 16.75 ? ? ? ? ? ? 96   PHE A CE1 1 
ATOM   753  C  CE2 . PHE A 1 98  ? -9.359  12.914  -23.232 1.00 13.06 ? ? ? ? ? ? 96   PHE A CE2 1 
ATOM   754  C  CZ  . PHE A 1 98  ? -8.982  14.183  -23.638 1.00 13.41 ? ? ? ? ? ? 96   PHE A CZ  1 
ATOM   755  N  N   . THR A 1 99  ? -13.487 11.888  -21.656 1.00 8.02  ? ? ? ? ? ? 97   THR A N   1 
ATOM   756  C  CA  . THR A 1 99  ? -13.808 10.581  -22.215 1.00 12.83 ? ? ? ? ? ? 97   THR A CA  1 
ATOM   757  C  C   . THR A 1 99  ? -12.709 10.166  -23.182 1.00 14.22 ? ? ? ? ? ? 97   THR A C   1 
ATOM   758  O  O   . THR A 1 99  ? -12.302 10.953  -24.045 1.00 10.54 ? ? ? ? ? ? 97   THR A O   1 
ATOM   759  C  CB  . THR A 1 99  ? -15.150 10.607  -22.945 1.00 13.22 ? ? ? ? ? ? 97   THR A CB  1 
ATOM   760  O  OG1 . THR A 1 99  ? -16.167 11.075  -22.056 1.00 14.58 ? ? ? ? ? ? 97   THR A OG1 1 
ATOM   761  C  CG2 . THR A 1 99  ? -15.523 9.208   -23.448 1.00 13.38 ? ? ? ? ? ? 97   THR A CG2 1 
ATOM   762  N  N   . VAL A 1 100 ? -12.217 8.943   -23.024 1.00 11.65 ? ? ? ? ? ? 98   VAL A N   1 
ATOM   763  C  CA  . VAL A 1 100 ? -11.247 8.375   -23.949 1.00 12.67 ? ? ? ? ? ? 98   VAL A CA  1 
ATOM   764  C  C   . VAL A 1 100 ? -11.936 7.243   -24.684 1.00 11.27 ? ? ? ? ? ? 98   VAL A C   1 
ATOM   765  O  O   . VAL A 1 100 ? -12.231 6.204   -24.079 1.00 10.18 ? ? ? ? ? ? 98   VAL A O   1 
ATOM   766  C  CB  . VAL A 1 100 ? -9.988  7.868   -23.237 1.00 10.28 ? ? ? ? ? ? 98   VAL A CB  1 
ATOM   767  C  CG1 . VAL A 1 100 ? -8.947  7.466   -24.273 1.00 10.32 ? ? ? ? ? ? 98   VAL A CG1 1 
ATOM   768  C  CG2 . VAL A 1 100 ? -9.449  8.937   -22.283 1.00 12.93 ? ? ? ? ? ? 98   VAL A CG2 1 
ATOM   769  N  N   . CYS A 1 101 ? -12.206 7.449   -25.978 1.00 10.04 ? ? ? ? ? ? 99   CYS A N   1 
ATOM   770  C  CA  . CYS A 1 101 ? -12.635 6.392   -26.883 1.00 12.14 ? ? ? ? ? ? 99   CYS A CA  1 
ATOM   771  C  C   . CYS A 1 101 ? -11.439 5.913   -27.698 1.00 14.60 ? ? ? ? ? ? 99   CYS A C   1 
ATOM   772  O  O   . CYS A 1 101 ? -10.340 6.471   -27.615 1.00 15.99 ? ? ? ? ? ? 99   CYS A O   1 
ATOM   773  C  CB  . CYS A 1 101 ? -13.746 6.874   -27.827 1.00 13.02 ? ? ? ? ? ? 99   CYS A CB  1 
ATOM   774  S  SG  . CYS A 1 101 ? -15.220 7.545   -27.015 1.00 17.20 ? ? ? ? ? ? 99   CYS A SG  1 
ATOM   775  N  N   . LYS A 1 102 ? -11.673 4.863   -28.494 1.00 12.96 ? ? ? ? ? ? 100  LYS A N   1 
ATOM   776  C  CA  . LYS A 1 102 ? -10.679 4.324   -29.418 1.00 10.53 ? ? ? ? ? ? 100  LYS A CA  1 
ATOM   777  C  C   . LYS A 1 102 ? -9.970  5.457   -30.152 1.00 12.63 ? ? ? ? ? ? 100  LYS A C   1 
ATOM   778  O  O   . LYS A 1 102 ? -10.614 6.310   -30.765 1.00 12.41 ? ? ? ? ? ? 100  LYS A O   1 
ATOM   779  C  CB  . LYS A 1 102 ? -11.364 3.386   -30.427 1.00 11.70 ? ? ? ? ? ? 100  LYS A CB  1 
ATOM   780  C  CG  . LYS A 1 102 ? -10.428 2.370   -31.100 1.00 18.24 ? ? ? ? ? ? 100  LYS A CG  1 
ATOM   781  C  CD  . LYS A 1 102 ? -11.220 1.332   -31.927 1.00 14.15 ? ? ? ? ? ? 100  LYS A CD  1 
ATOM   782  C  CE  . LYS A 1 102 ? -11.782 0.221   -31.043 1.00 13.02 ? ? ? ? ? ? 100  LYS A CE  1 
ATOM   783  N  NZ  . LYS A 1 102 ? -10.732 -0.642  -30.446 1.00 17.61 ? ? ? ? ? ? 100  LYS A NZ  1 
ATOM   784  N  N   . ASP A 1 103 ? -8.643  5.500   -30.043 1.00 15.25 ? ? ? ? ? ? 101  ASP A N   1 
ATOM   785  C  CA  . ASP A 1 103 ? -7.837  6.621   -30.546 1.00 13.03 ? ? ? ? ? ? 101  ASP A CA  1 
ATOM   786  C  C   . ASP A 1 103 ? -7.418  6.318   -31.979 1.00 12.74 ? ? ? ? ? ? 101  ASP A C   1 
ATOM   787  O  O   . ASP A 1 103 ? -6.408  5.661   -32.222 1.00 13.94 ? ? ? ? ? ? 101  ASP A O   1 
ATOM   788  C  CB  . ASP A 1 103 ? -6.622  6.820   -29.654 1.00 11.90 ? ? ? ? ? ? 101  ASP A CB  1 
ATOM   789  C  CG  . ASP A 1 103 ? -5.859  8.086   -29.960 1.00 15.62 ? ? ? ? ? ? 101  ASP A CG  1 
ATOM   790  O  OD1 . ASP A 1 103 ? -4.752  8.216   -29.397 1.00 13.70 ? ? ? ? ? ? 101  ASP A OD1 1 
ATOM   791  O  OD2 . ASP A 1 103 ? -6.353  8.954   -30.725 1.00 12.72 ? ? ? ? ? ? 101  ASP A OD2 1 
ATOM   792  N  N   . LEU A 1 104 ? -8.196  6.790   -32.947 1.00 10.08 ? ? ? ? ? ? 102  LEU A N   1 
ATOM   793  C  CA  . LEU A 1 104 ? -8.000  6.407   -34.342 1.00 13.16 ? ? ? ? ? ? 102  LEU A CA  1 
ATOM   794  C  C   . LEU A 1 104 ? -7.497  7.602   -35.137 1.00 14.03 ? ? ? ? ? ? 102  LEU A C   1 
ATOM   795  O  O   . LEU A 1 104 ? -8.159  8.644   -35.178 1.00 12.62 ? ? ? ? ? ? 102  LEU A O   1 
ATOM   796  C  CB  . LEU A 1 104 ? -9.296  5.877   -34.952 1.00 12.63 ? ? ? ? ? ? 102  LEU A CB  1 
ATOM   797  C  CG  . LEU A 1 104 ? -9.837  4.593   -34.340 1.00 12.80 ? ? ? ? ? ? 102  LEU A CG  1 
ATOM   798  C  CD1 . LEU A 1 104 ? -11.105 4.179   -35.078 1.00 14.62 ? ? ? ? ? ? 102  LEU A CD1 1 
ATOM   799  C  CD2 . LEU A 1 104 ? -8.783  3.497   -34.411 1.00 18.17 ? ? ? ? ? ? 102  LEU A CD2 1 
ATOM   800  N  N   . SER A 1 105 ? -6.348  7.447   -35.790 1.00 13.03 ? ? ? ? ? ? 103  SER A N   1 
ATOM   801  C  CA  . SER A 1 105 ? -5.808  8.566   -36.549 1.00 17.80 ? ? ? ? ? ? 103  SER A CA  1 
ATOM   802  C  C   . SER A 1 105 ? -6.650  8.839   -37.794 1.00 17.93 ? ? ? ? ? ? 103  SER A C   1 
ATOM   803  O  O   . SER A 1 105 ? -7.446  8.010   -38.243 1.00 13.49 ? ? ? ? ? ? 103  SER A O   1 
ATOM   804  C  CB  . SER A 1 105 ? -4.360  8.297   -36.949 1.00 19.62 ? ? ? ? ? ? 103  SER A CB  1 
ATOM   805  O  OG  . SER A 1 105 ? -4.313  7.473   -38.096 1.00 23.35 ? ? ? ? ? ? 103  SER A OG  1 
ATOM   806  N  N   . VAL A 1 106 ? -6.458  10.028  -38.371 1.00 17.84 ? ? ? ? ? ? 104  VAL A N   1 
ATOM   807  C  CA  . VAL A 1 106 ? -7.182  10.364  -39.589 1.00 17.99 ? ? ? ? ? ? 104  VAL A CA  1 
ATOM   808  C  C   . VAL A 1 106 ? -6.780  9.485   -40.762 1.00 15.98 ? ? ? ? ? ? 104  VAL A C   1 
ATOM   809  O  O   . VAL A 1 106 ? -7.430  9.536   -41.806 1.00 24.18 ? ? ? ? ? ? 104  VAL A O   1 
ATOM   810  C  CB  . VAL A 1 106 ? -7.001  11.856  -39.929 1.00 20.49 ? ? ? ? ? ? 104  VAL A CB  1 
ATOM   811  C  CG1 . VAL A 1 106 ? -7.571  12.719  -38.794 1.00 20.42 ? ? ? ? ? ? 104  VAL A CG1 1 
ATOM   812  C  CG2 . VAL A 1 106 ? -5.530  12.179  -40.165 1.00 23.22 ? ? ? ? ? ? 104  VAL A CG2 1 
ATOM   813  N  N   . GLY A 1 107 ? -5.742  8.663   -40.607 1.00 15.36 ? ? ? ? ? ? 105  GLY A N   1 
ATOM   814  C  CA  . GLY A 1 107 ? -5.359  7.673   -41.586 1.00 19.59 ? ? ? ? ? ? 105  GLY A CA  1 
ATOM   815  C  C   . GLY A 1 107 ? -6.036  6.329   -41.438 1.00 23.14 ? ? ? ? ? ? 105  GLY A C   1 
ATOM   816  O  O   . GLY A 1 107 ? -5.843  5.452   -42.284 1.00 21.18 ? ? ? ? ? ? 105  GLY A O   1 
ATOM   817  N  N   . ASP A 1 108 ? -6.824  6.136   -40.382 1.00 17.04 ? ? ? ? ? ? 106  ASP A N   1 
ATOM   818  C  CA  . ASP A 1 108 ? -7.608  4.916   -40.244 1.00 14.23 ? ? ? ? ? ? 106  ASP A CA  1 
ATOM   819  C  C   . ASP A 1 108 ? -8.733  4.896   -41.269 1.00 11.11 ? ? ? ? ? ? 106  ASP A C   1 
ATOM   820  O  O   . ASP A 1 108 ? -9.364  5.919   -41.528 1.00 15.19 ? ? ? ? ? ? 106  ASP A O   1 
ATOM   821  C  CB  . ASP A 1 108 ? -8.182  4.814   -38.827 1.00 13.87 ? ? ? ? ? ? 106  ASP A CB  1 
ATOM   822  C  CG  . ASP A 1 108 ? -8.923  3.514   -38.599 1.00 12.74 ? ? ? ? ? ? 106  ASP A CG  1 
ATOM   823  O  OD1 . ASP A 1 108 ? -10.117 3.434   -38.946 1.00 14.96 ? ? ? ? ? ? 106  ASP A OD1 1 
ATOM   824  O  OD2 . ASP A 1 108 ? -8.294  2.560   -38.103 1.00 14.96 ? ? ? ? ? ? 106  ASP A OD2 1 
ATOM   825  N  N   . GLN A 1 109 ? -8.991  3.716   -41.852 1.00 14.01 ? ? ? ? ? ? 107  GLN A N   1 
ATOM   826  C  CA  . GLN A 1 109 ? -9.962  3.629   -42.943 1.00 11.29 ? ? ? ? ? ? 107  GLN A CA  1 
ATOM   827  C  C   . GLN A 1 109 ? -11.366 4.012   -42.491 1.00 12.15 ? ? ? ? ? ? 107  GLN A C   1 
ATOM   828  O  O   . GLN A 1 109 ? -12.135 4.566   -43.283 1.00 15.71 ? ? ? ? ? ? 107  GLN A O   1 
ATOM   829  C  CB  . GLN A 1 109 ? -9.970  2.224   -43.568 1.00 17.59 ? ? ? ? ? ? 107  GLN A CB  1 
ATOM   830  C  CG  . GLN A 1 109 ? -10.436 1.094   -42.642 1.00 17.91 ? ? ? ? ? ? 107  GLN A CG  1 
ATOM   831  C  CD  . GLN A 1 109 ? -10.275 -0.301  -43.261 1.00 31.37 ? ? ? ? ? ? 107  GLN A CD  1 
ATOM   832  O  OE1 . GLN A 1 109 ? -10.320 -0.465  -44.485 1.00 34.07 ? ? ? ? ? ? 107  GLN A OE1 1 
ATOM   833  N  NE2 . GLN A 1 109 ? -10.085 -1.309  -42.411 1.00 25.33 ? ? ? ? ? ? 107  GLN A NE2 1 
ATOM   834  N  N   . ARG A 1 110 ? -11.718 3.739   -41.229 1.00 10.09 ? ? ? ? ? ? 108  ARG A N   1 
ATOM   835  C  CA  . ARG A 1 110 ? -13.039 4.122   -40.730 1.00 11.00 ? ? ? ? ? ? 108  ARG A CA  1 
ATOM   836  C  C   . ARG A 1 110 ? -13.167 5.633   -40.544 1.00 13.14 ? ? ? ? ? ? 108  ARG A C   1 
ATOM   837  O  O   . ARG A 1 110 ? -14.258 6.181   -40.711 1.00 12.67 ? ? ? ? ? ? 108  ARG A O   1 
ATOM   838  C  CB  . ARG A 1 110 ? -13.330 3.420   -39.400 1.00 8.25  ? ? ? ? ? ? 108  ARG A CB  1 
ATOM   839  C  CG  . ARG A 1 110 ? -13.332 1.888   -39.464 1.00 11.71 ? ? ? ? ? ? 108  ARG A CG  1 
ATOM   840  C  CD  . ARG A 1 110 ? -13.100 1.314   -38.057 1.00 9.98  ? ? ? ? ? ? 108  ARG A CD  1 
ATOM   841  N  NE  . ARG A 1 110 ? -11.685 1.373   -37.693 1.00 12.56 ? ? ? ? ? ? 108  ARG A NE  1 
ATOM   842  C  CZ  . ARG A 1 110 ? -11.161 0.809   -36.607 1.00 18.27 ? ? ? ? ? ? 108  ARG A CZ  1 
ATOM   843  N  NH1 . ARG A 1 110 ? -11.940 0.161   -35.741 1.00 13.93 ? ? ? ? ? ? 108  ARG A NH1 1 
ATOM   844  N  NH2 . ARG A 1 110 ? -9.856  0.898   -36.382 1.00 11.22 ? ? ? ? ? ? 108  ARG A NH2 1 
ATOM   845  N  N   . VAL A 1 111 ? -12.085 6.313   -40.156 1.00 12.01 ? ? ? ? ? ? 109  VAL A N   1 
ATOM   846  C  CA  . VAL A 1 111 ? -12.120 7.769   -40.030 1.00 10.39 ? ? ? ? ? ? 109  VAL A CA  1 
ATOM   847  C  C   . VAL A 1 111 ? -12.164 8.415   -41.409 1.00 15.00 ? ? ? ? ? ? 109  VAL A C   1 
ATOM   848  O  O   . VAL A 1 111 ? -12.938 9.349   -41.648 1.00 13.87 ? ? ? ? ? ? 109  VAL A O   1 
ATOM   849  C  CB  . VAL A 1 111 ? -10.917 8.265   -39.212 1.00 9.61  ? ? ? ? ? ? 109  VAL A CB  1 
ATOM   850  C  CG1 . VAL A 1 111 ? -11.002 9.779   -38.987 1.00 12.29 ? ? ? ? ? ? 109  VAL A CG1 1 
ATOM   851  C  CG2 . VAL A 1 111 ? -10.834 7.509   -37.882 1.00 13.64 ? ? ? ? ? ? 109  VAL A CG2 1 
ATOM   852  N  N   . LYS A 1 112 ? -11.341 7.923   -42.341 1.00 15.57 ? ? ? ? ? ? 110  LYS A N   1 
ATOM   853  C  CA  . LYS A 1 112 ? -11.418 8.394   -43.724 1.00 19.53 ? ? ? ? ? ? 110  LYS A CA  1 
ATOM   854  C  C   . LYS A 1 112 ? -12.828 8.242   -44.281 1.00 16.61 ? ? ? ? ? ? 110  LYS A C   1 
ATOM   855  O  O   . LYS A 1 112 ? -13.308 9.100   -45.032 1.00 17.53 ? ? ? ? ? ? 110  LYS A O   1 
ATOM   856  C  CB  . LYS A 1 112 ? -10.428 7.629   -44.605 1.00 16.40 ? ? ? ? ? ? 110  LYS A CB  1 
ATOM   857  C  CG  . LYS A 1 112 ? -8.949  7.863   -44.320 1.00 18.17 ? ? ? ? ? ? 110  LYS A CG  1 
ATOM   858  C  CD  . LYS A 1 112 ? -8.112  7.273   -45.450 1.00 27.31 ? ? ? ? ? ? 110  LYS A CD  1 
ATOM   859  C  CE  . LYS A 1 112 ? -6.740  6.829   -44.986 1.00 25.38 ? ? ? ? ? ? 110  LYS A CE  1 
ATOM   860  N  NZ  . LYS A 1 112 ? -5.987  6.098   -46.052 1.00 30.44 ? ? ? ? ? ? 110  LYS A NZ  1 
ATOM   861  N  N   . ALA A 1 113 ? -13.510 7.155   -43.924 1.00 13.32 ? ? ? ? ? ? 111  ALA A N   1 
ATOM   862  C  CA  . ALA A 1 113 ? -14.857 6.911   -44.423 1.00 14.45 ? ? ? ? ? ? 111  ALA A CA  1 
ATOM   863  C  C   . ALA A 1 113 ? -15.922 7.717   -43.687 1.00 14.02 ? ? ? ? ? ? 111  ALA A C   1 
ATOM   864  O  O   . ALA A 1 113 ? -17.086 7.695   -44.102 1.00 12.38 ? ? ? ? ? ? 111  ALA A O   1 
ATOM   865  C  CB  . ALA A 1 113 ? -15.189 5.413   -44.334 1.00 13.36 ? ? ? ? ? ? 111  ALA A CB  1 
ATOM   866  N  N   . GLY A 1 114 ? -15.569 8.407   -42.605 1.00 12.80 ? ? ? ? ? ? 112  GLY A N   1 
ATOM   867  C  CA  . GLY A 1 114 ? -16.561 9.179   -41.877 1.00 11.04 ? ? ? ? ? ? 112  GLY A CA  1 
ATOM   868  C  C   . GLY A 1 114 ? -17.528 8.361   -41.053 1.00 10.04 ? ? ? ? ? ? 112  GLY A C   1 
ATOM   869  O  O   . GLY A 1 114 ? -18.694 8.746   -40.911 1.00 9.13  ? ? ? ? ? ? 112  GLY A O   1 
ATOM   870  N  N   . TRP A 1 115 ? -17.082 7.233   -40.509 1.00 10.67 ? ? ? ? ? ? 113  TRP A N   1 
ATOM   871  C  CA  . TRP A 1 115 ? -17.929 6.491   -39.590 1.00 10.81 ? ? ? ? ? ? 113  TRP A CA  1 
ATOM   872  C  C   . TRP A 1 115 ? -18.244 7.375   -38.388 1.00 10.39 ? ? ? ? ? ? 113  TRP A C   1 
ATOM   873  O  O   . TRP A 1 115 ? -17.357 8.081   -37.888 1.00 8.95  ? ? ? ? ? ? 113  TRP A O   1 
ATOM   874  C  CB  . TRP A 1 115 ? -17.243 5.205   -39.130 1.00 8.70  ? ? ? ? ? ? 113  TRP A CB  1 
ATOM   875  C  CG  . TRP A 1 115 ? -17.257 4.097   -40.154 1.00 9.92  ? ? ? ? ? ? 113  TRP A CG  1 
ATOM   876  C  CD1 . TRP A 1 115 ? -17.435 4.221   -41.497 1.00 10.87 ? ? ? ? ? ? 113  TRP A CD1 1 
ATOM   877  C  CD2 . TRP A 1 115 ? -17.086 2.695   -39.898 1.00 7.41  ? ? ? ? ? ? 113  TRP A CD2 1 
ATOM   878  N  NE1 . TRP A 1 115 ? -17.376 2.983   -42.102 1.00 10.15 ? ? ? ? ? ? 113  TRP A NE1 1 
ATOM   879  C  CE2 . TRP A 1 115 ? -17.169 2.030   -41.137 1.00 10.63 ? ? ? ? ? ? 113  TRP A CE2 1 
ATOM   880  C  CE3 . TRP A 1 115 ? -16.874 1.938   -38.736 1.00 8.98  ? ? ? ? ? ? 113  TRP A CE3 1 
ATOM   881  C  CZ2 . TRP A 1 115 ? -17.044 0.643   -41.249 1.00 9.91  ? ? ? ? ? ? 113  TRP A CZ2 1 
ATOM   882  C  CZ3 . TRP A 1 115 ? -16.748 0.567   -38.849 1.00 11.08 ? ? ? ? ? ? 113  TRP A CZ3 1 
ATOM   883  C  CH2 . TRP A 1 115 ? -16.833 -0.069  -40.098 1.00 11.90 ? ? ? ? ? ? 113  TRP A CH2 1 
ATOM   884  N  N   . PRO A 1 116 ? -19.486 7.383   -37.915 1.00 11.11 ? ? ? ? ? ? 114  PRO A N   1 
ATOM   885  C  CA  . PRO A 1 116 ? -19.814 8.218   -36.753 1.00 10.47 ? ? ? ? ? ? 114  PRO A CA  1 
ATOM   886  C  C   . PRO A 1 116 ? -19.013 7.768   -35.542 1.00 11.40 ? ? ? ? ? ? 114  PRO A C   1 
ATOM   887  O  O   . PRO A 1 116 ? -18.802 6.572   -35.330 1.00 10.61 ? ? ? ? ? ? 114  PRO A O   1 
ATOM   888  C  CB  . PRO A 1 116 ? -21.316 7.984   -36.556 1.00 10.60 ? ? ? ? ? ? 114  PRO A CB  1 
ATOM   889  C  CG  . PRO A 1 116 ? -21.545 6.588   -37.097 1.00 11.82 ? ? ? ? ? ? 114  PRO A CG  1 
ATOM   890  C  CD  . PRO A 1 116 ? -20.584 6.461   -38.271 1.00 9.87  ? ? ? ? ? ? 114  PRO A CD  1 
ATOM   891  N  N   . CYS A 1 117 ? -18.530 8.745   -34.778 1.00 12.19 ? ? ? ? ? ? 115  CYS A N   1 
ATOM   892  C  CA  . CYS A 1 117 ? -17.804 8.606   -33.510 1.00 9.58  ? ? ? ? ? ? 115  CYS A CA  1 
ATOM   893  C  C   . CYS A 1 117 ? -16.363 8.125   -33.671 1.00 12.63 ? ? ? ? ? ? 115  CYS A C   1 
ATOM   894  O  O   . CYS A 1 117 ? -15.719 7.897   -32.651 1.00 10.98 ? ? ? ? ? ? 115  CYS A O   1 
ATOM   895  C  CB  . CYS A 1 117 ? -18.512 7.663   -32.522 1.00 13.65 ? ? ? ? ? ? 115  CYS A CB  1 
ATOM   896  S  SG  . CYS A 1 117 ? -20.284 7.916   -32.381 1.00 13.07 ? ? ? ? ? ? 115  CYS A SG  1 
ATOM   897  N  N   . HIS A 1 118 ? -15.836 7.967   -34.889 1.00 7.43  ? ? ? ? ? ? 116  HIS A N   1 
ATOM   898  C  CA  . HIS A 1 118 ? -14.480 7.473   -35.108 1.00 8.86  ? ? ? ? ? ? 116  HIS A CA  1 
ATOM   899  C  C   . HIS A 1 118 ? -13.545 8.644   -35.384 1.00 11.67 ? ? ? ? ? ? 116  HIS A C   1 
ATOM   900  O  O   . HIS A 1 118 ? -13.765 9.404   -36.333 1.00 12.48 ? ? ? ? ? ? 116  HIS A O   1 
ATOM   901  C  CB  . HIS A 1 118 ? -14.436 6.481   -36.277 1.00 8.44  ? ? ? ? ? ? 116  HIS A CB  1 
ATOM   902  C  CG  . HIS A 1 118 ? -15.065 5.160   -35.963 1.00 7.50  ? ? ? ? ? ? 116  HIS A CG  1 
ATOM   903  N  ND1 . HIS A 1 118 ? -16.393 5.041   -35.617 1.00 8.57  ? ? ? ? ? ? 116  HIS A ND1 1 
ATOM   904  C  CD2 . HIS A 1 118 ? -14.554 3.904   -35.931 1.00 9.24  ? ? ? ? ? ? 116  HIS A CD2 1 
ATOM   905  C  CE1 . HIS A 1 118 ? -16.675 3.769   -35.384 1.00 8.15  ? ? ? ? ? ? 116  HIS A CE1 1 
ATOM   906  N  NE2 . HIS A 1 118 ? -15.578 3.058   -35.570 1.00 8.93  ? ? ? ? ? ? 116  HIS A NE2 1 
ATOM   907  N  N   . GLY A 1 119 ? -12.502 8.780   -34.573 1.00 10.45 ? ? ? ? ? ? 117  GLY A N   1 
ATOM   908  C  CA  . GLY A 1 119 ? -11.536 9.847   -34.748 1.00 9.45  ? ? ? ? ? ? 117  GLY A CA  1 
ATOM   909  C  C   . GLY A 1 119 ? -10.462 9.852   -33.673 1.00 10.12 ? ? ? ? ? ? 117  GLY A C   1 
ATOM   910  O  O   . GLY A 1 119 ? -10.466 9.026   -32.755 1.00 12.59 ? ? ? ? ? ? 117  GLY A O   1 
ATOM   911  N  N   . PRO A 1 120 ? -9.510  10.779  -33.772 1.00 14.52 ? ? ? ? ? ? 118  PRO A N   1 
ATOM   912  C  CA  . PRO A 1 120 ? -8.409  10.815  -32.797 1.00 11.22 ? ? ? ? ? ? 118  PRO A CA  1 
ATOM   913  C  C   . PRO A 1 120 ? -8.790  11.548  -31.517 1.00 11.33 ? ? ? ? ? ? 118  PRO A C   1 
ATOM   914  O  O   . PRO A 1 120 ? -9.496  12.556  -31.547 1.00 11.46 ? ? ? ? ? ? 118  PRO A O   1 
ATOM   915  C  CB  . PRO A 1 120 ? -7.300  11.567  -33.546 1.00 14.50 ? ? ? ? ? ? 118  PRO A CB  1 
ATOM   916  C  CG  . PRO A 1 120 ? -8.023  12.401  -34.556 1.00 17.72 ? ? ? ? ? ? 118  PRO A CG  1 
ATOM   917  C  CD  . PRO A 1 120 ? -9.291  11.681  -34.912 1.00 15.04 ? ? ? ? ? ? 118  PRO A CD  1 
ATOM   918  N  N   . VAL A 1 121 ? -8.311  11.025  -30.389 1.00 9.45  ? ? ? ? ? ? 119  VAL A N   1 
ATOM   919  C  CA  . VAL A 1 121 ? -8.557  11.672  -29.087 1.00 10.76 ? ? ? ? ? ? 119  VAL A CA  1 
ATOM   920  C  C   . VAL A 1 121 ? -7.896  13.041  -29.076 1.00 12.28 ? ? ? ? ? ? 119  VAL A C   1 
ATOM   921  O  O   . VAL A 1 121 ? -6.711  13.154  -29.455 1.00 12.66 ? ? ? ? ? ? 119  VAL A O   1 
ATOM   922  C  CB  . VAL A 1 121 ? -8.007  10.806  -27.936 1.00 11.30 ? ? ? ? ? ? 119  VAL A CB  1 
ATOM   923  C  CG1 . VAL A 1 121 ? -8.188  11.538  -26.575 1.00 12.95 ? ? ? ? ? ? 119  VAL A CG1 1 
ATOM   924  C  CG2 . VAL A 1 121 ? -8.689  9.448   -27.913 1.00 9.54  ? ? ? ? ? ? 119  VAL A CG2 1 
ATOM   925  N  N   . PRO A 1 122 ? -8.589  14.107  -28.650 1.00 10.75 ? ? ? ? ? ? 120  PRO A N   1 
ATOM   926  C  CA  . PRO A 1 122 ? -7.902  15.413  -28.498 1.00 11.38 ? ? ? ? ? ? 120  PRO A CA  1 
ATOM   927  C  C   . PRO A 1 122 ? -7.110  15.492  -27.193 1.00 12.10 ? ? ? ? ? ? 120  PRO A C   1 
ATOM   928  O  O   . PRO A 1 122 ? -7.487  16.146  -26.218 1.00 13.02 ? ? ? ? ? ? 120  PRO A O   1 
ATOM   929  C  CB  . PRO A 1 122 ? -9.065  16.409  -28.539 1.00 9.97  ? ? ? ? ? ? 120  PRO A CB  1 
ATOM   930  C  CG  . PRO A 1 122 ? -10.227 15.656  -27.948 1.00 11.44 ? ? ? ? ? ? 120  PRO A CG  1 
ATOM   931  C  CD  . PRO A 1 122 ? -10.026 14.188  -28.306 1.00 10.96 ? ? ? ? ? ? 120  PRO A CD  1 
ATOM   932  N  N   . TRP A 1 123 ? -5.966  14.805  -27.175 1.00 10.17 ? ? ? ? ? ? 121  TRP A N   1 
ATOM   933  C  CA  . TRP A 1 123 ? -5.155  14.693  -25.972 1.00 12.13 ? ? ? ? ? ? 121  TRP A CA  1 
ATOM   934  C  C   . TRP A 1 123 ? -4.666  16.062  -25.503 1.00 16.37 ? ? ? ? ? ? 121  TRP A C   1 
ATOM   935  O  O   . TRP A 1 123 ? -4.216  16.883  -26.319 1.00 12.45 ? ? ? ? ? ? 121  TRP A O   1 
ATOM   936  C  CB  . TRP A 1 123 ? -3.946  13.791  -26.214 1.00 12.67 ? ? ? ? ? ? 121  TRP A CB  1 
ATOM   937  C  CG  . TRP A 1 123 ? -4.279  12.373  -26.516 1.00 12.86 ? ? ? ? ? ? 121  TRP A CG  1 
ATOM   938  C  CD1 . TRP A 1 123 ? -4.049  11.722  -27.694 1.00 14.99 ? ? ? ? ? ? 121  TRP A CD1 1 
ATOM   939  C  CD2 . TRP A 1 123 ? -4.874  11.409  -25.631 1.00 15.59 ? ? ? ? ? ? 121  TRP A CD2 1 
ATOM   940  N  NE1 . TRP A 1 123 ? -4.466  10.421  -27.601 1.00 11.66 ? ? ? ? ? ? 121  TRP A NE1 1 
ATOM   941  C  CE2 . TRP A 1 123 ? -4.981  10.197  -26.351 1.00 12.75 ? ? ? ? ? ? 121  TRP A CE2 1 
ATOM   942  C  CE3 . TRP A 1 123 ? -5.336  11.454  -24.308 1.00 15.01 ? ? ? ? ? ? 121  TRP A CE3 1 
ATOM   943  C  CZ2 . TRP A 1 123 ? -5.530  9.036   -25.794 1.00 8.48  ? ? ? ? ? ? 121  TRP A CZ2 1 
ATOM   944  C  CZ3 . TRP A 1 123 ? -5.880  10.294  -23.751 1.00 11.85 ? ? ? ? ? ? 121  TRP A CZ3 1 
ATOM   945  C  CH2 . TRP A 1 123 ? -5.977  9.107   -24.498 1.00 10.21 ? ? ? ? ? ? 121  TRP A CH2 1 
ATOM   946  N  N   . PRO A 1 124 ? -4.703  16.324  -24.206 1.00 12.45 ? ? ? ? ? ? 122  PRO A N   1 
ATOM   947  C  CA  . PRO A 1 124 ? -4.242  17.622  -23.687 1.00 12.88 ? ? ? ? ? ? 122  PRO A CA  1 
ATOM   948  C  C   . PRO A 1 124 ? -2.725  17.724  -23.601 1.00 20.28 ? ? ? ? ? ? 122  PRO A C   1 
ATOM   949  O  O   . PRO A 1 124 ? -2.164  18.818  -23.695 1.00 15.75 ? ? ? ? ? ? 122  PRO A O   1 
ATOM   950  C  CB  . PRO A 1 124 ? -4.880  17.686  -22.293 1.00 18.19 ? ? ? ? ? ? 122  PRO A CB  1 
ATOM   951  C  CG  . PRO A 1 124 ? -4.994  16.221  -21.873 1.00 17.63 ? ? ? ? ? ? 122  PRO A CG  1 
ATOM   952  C  CD  . PRO A 1 124 ? -5.273  15.450  -23.157 1.00 10.86 ? ? ? ? ? ? 122  PRO A CD  1 
ATOM   953  N  N   . ASN A 1 125 ? -2.050  16.596  -23.403 1.00 12.34 ? ? ? ? ? ? 123  ASN A N   1 
ATOM   954  C  CA  . ASN A 1 125 ? -0.595  16.581  -23.356 1.00 16.49 ? ? ? ? ? ? 123  ASN A CA  1 
ATOM   955  C  C   . ASN A 1 125 ? -0.146  15.138  -23.518 1.00 21.92 ? ? ? ? ? ? 123  ASN A C   1 
ATOM   956  O  O   . ASN A 1 125 ? -0.957  14.208  -23.488 1.00 14.82 ? ? ? ? ? ? 123  ASN A O   1 
ATOM   957  C  CB  . ASN A 1 125 ? -0.052  17.220  -22.060 1.00 20.46 ? ? ? ? ? ? 123  ASN A CB  1 
ATOM   958  C  CG  . ASN A 1 125 ? -0.446  16.455  -20.802 1.00 20.42 ? ? ? ? ? ? 123  ASN A CG  1 
ATOM   959  O  OD1 . ASN A 1 125 ? 0.085   15.372  -20.528 1.00 18.14 ? ? ? ? ? ? 123  ASN A OD1 1 
ATOM   960  N  ND2 . ASN A 1 125 ? -1.362  17.029  -20.015 1.00 13.77 ? ? ? ? ? ? 123  ASN A ND2 1 
ATOM   961  N  N   . ASN A 1 126 ? 1.161   14.963  -23.700 1.00 17.92 ? ? ? ? ? ? 124  ASN A N   1 
ATOM   962  C  CA  . ASN A 1 126 ? 1.687   13.644  -24.012 1.00 24.59 ? ? ? ? ? ? 124  ASN A CA  1 
ATOM   963  C  C   . ASN A 1 126 ? 1.748   12.739  -22.789 1.00 20.76 ? ? ? ? ? ? 124  ASN A C   1 
ATOM   964  O  O   . ASN A 1 126 ? 1.635   11.522  -22.933 1.00 21.37 ? ? ? ? ? ? 124  ASN A O   1 
ATOM   965  C  CB  . ASN A 1 126 ? 3.064   13.778  -24.665 1.00 32.55 ? ? ? ? ? ? 124  ASN A CB  1 
ATOM   966  C  CG  . ASN A 1 126 ? 2.967   14.075  -26.154 1.00 48.55 ? ? ? ? ? ? 124  ASN A CG  1 
ATOM   967  O  OD1 . ASN A 1 126 ? 1.926   13.848  -26.775 1.00 52.51 ? ? ? ? ? ? 124  ASN A OD1 1 
ATOM   968  N  ND2 . ASN A 1 126 ? 4.044   14.602  -26.730 1.00 53.45 ? ? ? ? ? ? 124  ASN A ND2 1 
ATOM   969  N  N   . THR A 1 127 ? 1.906   13.295  -21.588 1.00 17.21 ? ? ? ? ? ? 125  THR A N   1 
ATOM   970  C  CA  . THR A 1 127 ? 1.870   12.458  -20.390 1.00 23.60 ? ? ? ? ? ? 125  THR A CA  1 
ATOM   971  C  C   . THR A 1 127 ? 0.473   11.906  -20.148 1.00 19.44 ? ? ? ? ? ? 125  THR A C   1 
ATOM   972  O  O   . THR A 1 127 ? 0.312   10.730  -19.811 1.00 13.81 ? ? ? ? ? ? 125  THR A O   1 
ATOM   973  C  CB  . THR A 1 127 ? 2.336   13.255  -19.174 1.00 24.23 ? ? ? ? ? ? 125  THR A CB  1 
ATOM   974  O  OG1 . THR A 1 127 ? 3.664   13.723  -19.411 1.00 22.88 ? ? ? ? ? ? 125  THR A OG1 1 
ATOM   975  C  CG2 . THR A 1 127 ? 2.322   12.385  -17.913 1.00 22.41 ? ? ? ? ? ? 125  THR A CG2 1 
ATOM   976  N  N   . TYR A 1 128 ? -0.545  12.753  -20.296 1.00 15.81 ? ? ? ? ? ? 126  TYR A N   1 
ATOM   977  C  CA  . TYR A 1 128 ? -1.932  12.301  -20.225 1.00 13.92 ? ? ? ? ? ? 126  TYR A CA  1 
ATOM   978  C  C   . TYR A 1 128 ? -2.209  11.209  -21.254 1.00 16.36 ? ? ? ? ? ? 126  TYR A C   1 
ATOM   979  O  O   . TYR A 1 128 ? -2.826  10.181  -20.941 1.00 14.58 ? ? ? ? ? ? 126  TYR A O   1 
ATOM   980  C  CB  . TYR A 1 128 ? -2.855  13.498  -20.443 1.00 12.77 ? ? ? ? ? ? 126  TYR A CB  1 
ATOM   981  C  CG  . TYR A 1 128 ? -4.273  13.324  -19.960 1.00 12.00 ? ? ? ? ? ? 126  TYR A CG  1 
ATOM   982  C  CD1 . TYR A 1 128 ? -4.693  13.917  -18.778 1.00 12.71 ? ? ? ? ? ? 126  TYR A CD1 1 
ATOM   983  C  CD2 . TYR A 1 128 ? -5.202  12.602  -20.703 1.00 14.18 ? ? ? ? ? ? 126  TYR A CD2 1 
ATOM   984  C  CE1 . TYR A 1 128 ? -5.998  13.781  -18.333 1.00 13.15 ? ? ? ? ? ? 126  TYR A CE1 1 
ATOM   985  C  CE2 . TYR A 1 128 ? -6.517  12.472  -20.276 1.00 10.02 ? ? ? ? ? ? 126  TYR A CE2 1 
ATOM   986  C  CZ  . TYR A 1 128 ? -6.903  13.055  -19.089 1.00 12.36 ? ? ? ? ? ? 126  TYR A CZ  1 
ATOM   987  O  OH  . TYR A 1 128 ? -8.199  12.926  -18.648 1.00 10.16 ? ? ? ? ? ? 126  TYR A OH  1 
ATOM   988  N  N   . GLN A 1 129 ? -1.754  11.418  -22.491 1.00 14.87 ? ? ? ? ? ? 127  GLN A N   1 
ATOM   989  C  CA  . GLN A 1 129 ? -1.967  10.435  -23.552 1.00 11.64 ? ? ? ? ? ? 127  GLN A CA  1 
ATOM   990  C  C   . GLN A 1 129 ? -1.362  9.086   -23.189 1.00 12.67 ? ? ? ? ? ? 127  GLN A C   1 
ATOM   991  O  O   . GLN A 1 129 ? -2.029  8.049   -23.275 1.00 12.47 ? ? ? ? ? ? 127  GLN A O   1 
ATOM   992  C  CB  . GLN A 1 129 ? -1.375  10.938  -24.869 1.00 14.08 ? ? ? ? ? ? 127  GLN A CB  1 
ATOM   993  C  CG  . GLN A 1 129 ? -1.416  9.899   -25.991 1.00 15.59 ? ? ? ? ? ? 127  GLN A CG  1 
ATOM   994  C  CD  . GLN A 1 129 ? -0.911  10.435  -27.331 1.00 23.05 ? ? ? ? ? ? 127  GLN A CD  1 
ATOM   995  O  OE1 . GLN A 1 129 ? -1.202  9.866   -28.378 1.00 25.50 ? ? ? ? ? ? 127  GLN A OE1 1 
ATOM   996  N  NE2 . GLN A 1 129 ? -0.157  11.527  -27.296 1.00 24.68 ? ? ? ? ? ? 127  GLN A NE2 1 
ATOM   997  N  N   . LYS A 1 130 ? -0.093  9.077   -22.788 1.00 14.34 ? ? ? ? ? ? 128  LYS A N   1 
ATOM   998  C  CA  . LYS A 1 130 ? 0.581   7.806   -22.532 1.00 14.73 ? ? ? ? ? ? 128  LYS A CA  1 
ATOM   999  C  C   . LYS A 1 130 ? -0.010  7.117   -21.313 1.00 16.31 ? ? ? ? ? ? 128  LYS A C   1 
ATOM   1000 O  O   . LYS A 1 130 ? -0.164  5.894   -21.299 1.00 15.60 ? ? ? ? ? ? 128  LYS A O   1 
ATOM   1001 C  CB  . LYS A 1 130 ? 2.085   8.029   -22.331 1.00 22.51 ? ? ? ? ? ? 128  LYS A CB  1 
ATOM   1002 C  CG  . LYS A 1 130 ? 2.944   8.150   -23.617 1.00 30.99 ? ? ? ? ? ? 128  LYS A CG  1 
ATOM   1003 C  CD  . LYS A 1 130 ? 2.370   9.128   -24.635 1.00 41.09 ? ? ? ? ? ? 128  LYS A CD  1 
ATOM   1004 C  CE  . LYS A 1 130 ? 3.397   9.543   -25.675 1.00 45.04 ? ? ? ? ? ? 128  LYS A CE  1 
ATOM   1005 N  NZ  . LYS A 1 130 ? 3.174   10.946  -26.133 1.00 45.23 ? ? ? ? ? ? 128  LYS A NZ  1 
ATOM   1006 N  N   . SER A 1 131 ? -0.342  7.892   -20.279 1.00 14.46 ? ? ? ? ? ? 129  SER A N   1 
ATOM   1007 C  CA  . SER A 1 131 ? -0.908  7.323   -19.056 1.00 14.15 ? ? ? ? ? ? 129  SER A CA  1 
ATOM   1008 C  C   . SER A 1 131 ? -2.238  6.629   -19.318 1.00 12.75 ? ? ? ? ? ? 129  SER A C   1 
ATOM   1009 O  O   . SER A 1 131 ? -2.468  5.505   -18.848 1.00 12.35 ? ? ? ? ? ? 129  SER A O   1 
ATOM   1010 C  CB  . SER A 1 131 ? -1.087  8.423   -18.004 1.00 17.22 ? ? ? ? ? ? 129  SER A CB  1 
ATOM   1011 O  OG  . SER A 1 131 ? 0.161   8.809   -17.479 1.00 26.19 ? ? ? ? ? ? 129  SER A OG  1 
ATOM   1012 N  N   . MET A 1 132 ? -3.137  7.290   -20.054 1.00 10.57 ? ? ? ? ? ? 130  MET A N   1 
ATOM   1013 C  CA  . MET A 1 132 ? -4.455  6.711   -20.298 1.00 11.18 ? ? ? ? ? ? 130  MET A CA  1 
ATOM   1014 C  C   . MET A 1 132 ? -4.388  5.522   -21.244 1.00 9.69  ? ? ? ? ? ? 130  MET A C   1 
ATOM   1015 O  O   . MET A 1 132 ? -5.105  4.529   -21.043 1.00 10.58 ? ? ? ? ? ? 130  MET A O   1 
ATOM   1016 C  CB  . MET A 1 132 ? -5.413  7.772   -20.844 1.00 9.88  ? ? ? ? ? ? 130  MET A CB  1 
ATOM   1017 C  CG  . MET A 1 132 ? -5.601  8.995   -19.928 1.00 9.87  ? ? ? ? ? ? 130  MET A CG  1 
ATOM   1018 S  SD  . MET A 1 132 ? -6.166  8.491   -18.283 1.00 15.59 ? ? ? ? ? ? 130  MET A SD  1 
ATOM   1019 C  CE  . MET A 1 132 ? -6.028  10.049  -17.410 1.00 16.56 ? ? ? ? ? ? 130  MET A CE  1 
ATOM   1020 N  N   . LYS A 1 133 ? -3.554  5.611   -22.288 1.00 12.88 ? ? ? ? ? ? 131  LYS A N   1 
ATOM   1021 C  CA  . LYS A 1 133 ? -3.460  4.504   -23.230 1.00 11.08 ? ? ? ? ? ? 131  LYS A CA  1 
ATOM   1022 C  C   . LYS A 1 133 ? -2.925  3.245   -22.550 1.00 11.27 ? ? ? ? ? ? 131  LYS A C   1 
ATOM   1023 O  O   . LYS A 1 133 ? -3.466  2.152   -22.739 1.00 12.82 ? ? ? ? ? ? 131  LYS A O   1 
ATOM   1024 C  CB  . LYS A 1 133 ? -2.573  4.893   -24.409 1.00 11.63 ? ? ? ? ? ? 131  LYS A CB  1 
ATOM   1025 C  CG  . LYS A 1 133 ? -3.182  5.951   -25.308 1.00 14.96 ? ? ? ? ? ? 131  LYS A CG  1 
ATOM   1026 C  CD  . LYS A 1 133 ? -2.278  6.253   -26.483 1.00 20.32 ? ? ? ? ? ? 131  LYS A CD  1 
ATOM   1027 C  CE  . LYS A 1 133 ? -3.063  6.190   -27.781 1.00 24.25 ? ? ? ? ? ? 131  LYS A CE  1 
ATOM   1028 N  NZ  . LYS A 1 133 ? -2.235  6.631   -28.933 1.00 22.02 ? ? ? ? ? ? 131  LYS A NZ  1 
ATOM   1029 N  N   . THR A 1 134 ? -1.865  3.376   -21.745 1.00 11.65 ? ? ? ? ? ? 132  THR A N   1 
ATOM   1030 C  CA  A THR A 1 134 ? -1.293  2.211   -21.070 0.38 13.84 ? ? ? ? ? ? 132  THR A CA  1 
ATOM   1031 C  CA  B THR A 1 134 ? -1.313  2.188   -21.098 0.62 12.37 ? ? ? ? ? ? 132  THR A CA  1 
ATOM   1032 C  C   . THR A 1 134 ? -2.245  1.663   -20.012 1.00 11.58 ? ? ? ? ? ? 132  THR A C   1 
ATOM   1033 O  O   . THR A 1 134 ? -2.350  0.443   -19.821 1.00 12.67 ? ? ? ? ? ? 132  THR A O   1 
ATOM   1034 C  CB  A THR A 1 134 ? 0.051   2.584   -20.439 0.38 16.68 ? ? ? ? ? ? 132  THR A CB  1 
ATOM   1035 C  CB  B THR A 1 134 ? 0.073   2.472   -20.519 0.62 16.77 ? ? ? ? ? ? 132  THR A CB  1 
ATOM   1036 O  OG1 A THR A 1 134 ? 0.742   3.505   -21.293 0.38 19.15 ? ? ? ? ? ? 132  THR A OG1 1 
ATOM   1037 O  OG1 B THR A 1 134 ? -0.013  3.527   -19.560 0.62 12.85 ? ? ? ? ? ? 132  THR A OG1 1 
ATOM   1038 C  CG2 A THR A 1 134 ? 0.910   1.351   -20.245 0.38 12.71 ? ? ? ? ? ? 132  THR A CG2 1 
ATOM   1039 C  CG2 B THR A 1 134 ? 1.047   2.855   -21.631 0.62 18.50 ? ? ? ? ? ? 132  THR A CG2 1 
ATOM   1040 N  N   . PHE A 1 135 ? -2.937  2.559   -19.307 1.00 9.16  ? ? ? ? ? ? 133  PHE A N   1 
ATOM   1041 C  CA  . PHE A 1 135 ? -3.949  2.151   -18.338 1.00 11.12 ? ? ? ? ? ? 133  PHE A CA  1 
ATOM   1042 C  C   . PHE A 1 135 ? -5.068  1.372   -19.021 1.00 10.74 ? ? ? ? ? ? 133  PHE A C   1 
ATOM   1043 O  O   . PHE A 1 135 ? -5.497  0.317   -18.539 1.00 10.00 ? ? ? ? ? ? 133  PHE A O   1 
ATOM   1044 C  CB  . PHE A 1 135 ? -4.487  3.406   -17.643 1.00 11.39 ? ? ? ? ? ? 133  PHE A CB  1 
ATOM   1045 C  CG  . PHE A 1 135 ? -5.417  3.153   -16.474 1.00 9.84  ? ? ? ? ? ? 133  PHE A CG  1 
ATOM   1046 C  CD1 . PHE A 1 135 ? -5.325  2.016   -15.692 1.00 13.13 ? ? ? ? ? ? 133  PHE A CD1 1 
ATOM   1047 C  CD2 . PHE A 1 135 ? -6.398  4.097   -16.166 1.00 12.34 ? ? ? ? ? ? 133  PHE A CD2 1 
ATOM   1048 C  CE1 . PHE A 1 135 ? -6.188  1.835   -14.610 1.00 9.74  ? ? ? ? ? ? 133  PHE A CE1 1 
ATOM   1049 C  CE2 . PHE A 1 135 ? -7.268  3.917   -15.108 1.00 9.27  ? ? ? ? ? ? 133  PHE A CE2 1 
ATOM   1050 C  CZ  . PHE A 1 135 ? -7.163  2.789   -14.331 1.00 11.58 ? ? ? ? ? ? 133  PHE A CZ  1 
ATOM   1051 N  N   . MET A 1 136 ? -5.533  1.867   -20.170 1.00 8.64  ? ? ? ? ? ? 134  MET A N   1 
ATOM   1052 C  CA  . MET A 1 136 ? -6.647  1.216   -20.850 1.00 12.06 ? ? ? ? ? ? 134  MET A CA  1 
ATOM   1053 C  C   . MET A 1 136 ? -6.244  -0.121  -21.460 1.00 10.09 ? ? ? ? ? ? 134  MET A C   1 
ATOM   1054 O  O   . MET A 1 136 ? -7.064  -1.040  -21.512 1.00 9.74  ? ? ? ? ? ? 134  MET A O   1 
ATOM   1055 C  CB  . MET A 1 136 ? -7.230  2.163   -21.903 1.00 10.64 ? ? ? ? ? ? 134  MET A CB  1 
ATOM   1056 C  CG  . MET A 1 136 ? -8.136  3.198   -21.239 1.00 13.69 ? ? ? ? ? ? 134  MET A CG  1 
ATOM   1057 S  SD  . MET A 1 136 ? -8.839  4.433   -22.333 1.00 16.41 ? ? ? ? ? ? 134  MET A SD  1 
ATOM   1058 C  CE  . MET A 1 136 ? -10.126 3.490   -23.147 1.00 15.56 ? ? ? ? ? ? 134  MET A CE  1 
ATOM   1059 N  N   . GLU A 1 137 ? -5.000  -0.257  -21.923 1.00 11.30 ? ? ? ? ? ? 135  GLU A N   1 
ATOM   1060 C  CA  . GLU A 1 137 ? -4.536  -1.565  -22.388 1.00 14.74 ? ? ? ? ? ? 135  GLU A CA  1 
ATOM   1061 C  C   . GLU A 1 137 ? -4.561  -2.597  -21.259 1.00 15.26 ? ? ? ? ? ? 135  GLU A C   1 
ATOM   1062 O  O   . GLU A 1 137 ? -5.015  -3.737  -21.443 1.00 10.72 ? ? ? ? ? ? 135  GLU A O   1 
ATOM   1063 C  CB  . GLU A 1 137 ? -3.127  -1.441  -22.967 1.00 13.82 ? ? ? ? ? ? 135  GLU A CB  1 
ATOM   1064 C  CG  . GLU A 1 137 ? -2.705  -2.624  -23.826 1.00 28.40 ? ? ? ? ? ? 135  GLU A CG  1 
ATOM   1065 C  CD  . GLU A 1 137 ? -1.946  -3.683  -23.036 1.00 43.53 ? ? ? ? ? ? 135  GLU A CD  1 
ATOM   1066 O  OE1 . GLU A 1 137 ? -1.649  -4.756  -23.614 1.00 44.73 ? ? ? ? ? ? 135  GLU A OE1 1 
ATOM   1067 O  OE2 . GLU A 1 137 ? -1.645  -3.444  -21.842 1.00 41.32 ? ? ? ? ? ? 135  GLU A OE2 1 
ATOM   1068 N  N   . GLU A 1 138 ? -4.069  -2.213  -20.087 1.00 13.97 ? ? ? ? ? ? 136  GLU A N   1 
ATOM   1069 C  CA  . GLU A 1 138 ? -4.105  -3.094  -18.928 1.00 14.51 ? ? ? ? ? ? 136  GLU A CA  1 
ATOM   1070 C  C   . GLU A 1 138 ? -5.544  -3.404  -18.515 1.00 10.22 ? ? ? ? ? ? 136  GLU A C   1 
ATOM   1071 O  O   . GLU A 1 138 ? -5.880  -4.558  -18.223 1.00 10.47 ? ? ? ? ? ? 136  GLU A O   1 
ATOM   1072 C  CB  . GLU A 1 138 ? -3.317  -2.439  -17.789 1.00 15.17 ? ? ? ? ? ? 136  GLU A CB  1 
ATOM   1073 C  CG  . GLU A 1 138 ? -2.929  -3.360  -16.681 1.00 20.59 ? ? ? ? ? ? 136  GLU A CG  1 
ATOM   1074 C  CD  . GLU A 1 138 ? -1.903  -4.382  -17.110 1.00 18.43 ? ? ? ? ? ? 136  GLU A CD  1 
ATOM   1075 O  OE1 . GLU A 1 138 ? -2.255  -5.571  -17.126 1.00 16.66 ? ? ? ? ? ? 136  GLU A OE1 1 
ATOM   1076 O  OE2 . GLU A 1 138 ? -0.755  -3.997  -17.420 1.00 20.97 ? ? ? ? ? ? 136  GLU A OE2 1 
ATOM   1077 N  N   . LEU A 1 139 ? -6.414  -2.388  -18.505 1.00 9.06  ? ? ? ? ? ? 137  LEU A N   1 
ATOM   1078 C  CA  . LEU A 1 139 ? -7.822  -2.619  -18.181 1.00 8.65  ? ? ? ? ? ? 137  LEU A CA  1 
ATOM   1079 C  C   . LEU A 1 139 ? -8.474  -3.562  -19.180 1.00 11.34 ? ? ? ? ? ? 137  LEU A C   1 
ATOM   1080 O  O   . LEU A 1 139 ? -9.350  -4.362  -18.816 1.00 7.97  ? ? ? ? ? ? 137  LEU A O   1 
ATOM   1081 C  CB  . LEU A 1 139 ? -8.582  -1.288  -18.147 1.00 8.56  ? ? ? ? ? ? 137  LEU A CB  1 
ATOM   1082 C  CG  . LEU A 1 139 ? -8.311  -0.372  -16.946 1.00 10.74 ? ? ? ? ? ? 137  LEU A CG  1 
ATOM   1083 C  CD1 . LEU A 1 139 ? -8.706  1.071   -17.284 1.00 8.63  ? ? ? ? ? ? 137  LEU A CD1 1 
ATOM   1084 C  CD2 . LEU A 1 139 ? -9.054  -0.852  -15.690 1.00 8.11  ? ? ? ? ? ? 137  LEU A CD2 1 
ATOM   1085 N  N   . GLY A 1 140 ? -8.087  -3.457  -20.454 1.00 9.48  ? ? ? ? ? ? 138  GLY A N   1 
ATOM   1086 C  CA  . GLY A 1 140 ? -8.640  -4.353  -21.458 1.00 10.30 ? ? ? ? ? ? 138  GLY A CA  1 
ATOM   1087 C  C   . GLY A 1 140 ? -8.272  -5.800  -21.206 1.00 10.72 ? ? ? ? ? ? 138  GLY A C   1 
ATOM   1088 O  O   . GLY A 1 140 ? -9.090  -6.706  -21.407 1.00 10.49 ? ? ? ? ? ? 138  GLY A O   1 
ATOM   1089 N  N   . LEU A 1 141 ? -7.029  -6.044  -20.782 1.00 10.64 ? ? ? ? ? ? 139  LEU A N   1 
ATOM   1090 C  CA  . LEU A 1 141 ? -6.611  -7.412  -20.478 1.00 11.10 ? ? ? ? ? ? 139  LEU A CA  1 
ATOM   1091 C  C   . LEU A 1 141 ? -7.451  -8.006  -19.359 1.00 13.13 ? ? ? ? ? ? 139  LEU A C   1 
ATOM   1092 O  O   . LEU A 1 141 ? -7.825  -9.185  -19.406 1.00 10.00 ? ? ? ? ? ? 139  LEU A O   1 
ATOM   1093 C  CB  . LEU A 1 141 ? -5.130  -7.443  -20.103 1.00 12.45 ? ? ? ? ? ? 139  LEU A CB  1 
ATOM   1094 C  CG  . LEU A 1 141 ? -4.164  -7.108  -21.238 1.00 15.76 ? ? ? ? ? ? 139  LEU A CG  1 
ATOM   1095 C  CD1 . LEU A 1 141 ? -2.741  -6.990  -20.705 1.00 21.37 ? ? ? ? ? ? 139  LEU A CD1 1 
ATOM   1096 C  CD2 . LEU A 1 141 ? -4.250  -8.169  -22.323 1.00 16.53 ? ? ? ? ? ? 139  LEU A CD2 1 
ATOM   1097 N  N   . ALA A 1 142 ? -7.754  -7.204  -18.338 1.00 11.42 ? ? ? ? ? ? 140  ALA A N   1 
ATOM   1098 C  CA  . ALA A 1 142 ? -8.621  -7.674  -17.267 1.00 10.88 ? ? ? ? ? ? 140  ALA A CA  1 
ATOM   1099 C  C   . ALA A 1 142 ? -10.040 -7.884  -17.775 1.00 13.11 ? ? ? ? ? ? 140  ALA A C   1 
ATOM   1100 O  O   . ALA A 1 142 ? -10.681 -8.883  -17.438 1.00 8.91  ? ? ? ? ? ? 140  ALA A O   1 
ATOM   1101 C  CB  . ALA A 1 142 ? -8.598  -6.686  -16.098 1.00 8.42  ? ? ? ? ? ? 140  ALA A CB  1 
ATOM   1102 N  N   . GLY A 1 143 ? -10.537 -6.962  -18.606 1.00 8.26  ? ? ? ? ? ? 141  GLY A N   1 
ATOM   1103 C  CA  . GLY A 1 143 ? -11.862 -7.141  -19.185 1.00 11.05 ? ? ? ? ? ? 141  GLY A CA  1 
ATOM   1104 C  C   . GLY A 1 143 ? -12.012 -8.461  -19.923 1.00 10.68 ? ? ? ? ? ? 141  GLY A C   1 
ATOM   1105 O  O   . GLY A 1 143 ? -13.038 -9.138  -19.801 1.00 8.06  ? ? ? ? ? ? 141  GLY A O   1 
ATOM   1106 N  N   . GLU A 1 144 ? -10.985 -8.855  -20.683 1.00 8.04  ? ? ? ? ? ? 142  GLU A N   1 
ATOM   1107 C  CA  . GLU A 1 144 ? -11.081 -10.108 -21.429 1.00 8.86  ? ? ? ? ? ? 142  GLU A CA  1 
ATOM   1108 C  C   . GLU A 1 144 ? -11.076 -11.313 -20.495 1.00 12.30 ? ? ? ? ? ? 142  GLU A C   1 
ATOM   1109 O  O   . GLU A 1 144 ? -11.854 -12.252 -20.701 1.00 10.18 ? ? ? ? ? ? 142  GLU A O   1 
ATOM   1110 C  CB  . GLU A 1 144 ? -9.952  -10.203 -22.458 1.00 11.15 ? ? ? ? ? ? 142  GLU A CB  1 
ATOM   1111 C  CG  . GLU A 1 144 ? -10.061 -9.113  -23.535 1.00 12.44 ? ? ? ? ? ? 142  GLU A CG  1 
ATOM   1112 C  CD  . GLU A 1 144 ? -11.172 -9.413  -24.519 1.00 15.38 ? ? ? ? ? ? 142  GLU A CD  1 
ATOM   1113 O  OE1 . GLU A 1 144 ? -11.062 -10.425 -25.239 1.00 15.07 ? ? ? ? ? ? 142  GLU A OE1 1 
ATOM   1114 O  OE2 . GLU A 1 144 ? -12.153 -8.647  -24.581 1.00 14.65 ? ? ? ? ? ? 142  GLU A OE2 1 
ATOM   1115 N  N   . ARG A 1 145 ? -10.226 -11.302 -19.456 1.00 9.99  ? ? ? ? ? ? 143  ARG A N   1 
ATOM   1116 C  CA  . ARG A 1 145 ? -10.264 -12.378 -18.460 1.00 9.57  ? ? ? ? ? ? 143  ARG A CA  1 
ATOM   1117 C  C   . ARG A 1 145 ? -11.649 -12.498 -17.841 1.00 9.40  ? ? ? ? ? ? 143  ARG A C   1 
ATOM   1118 O  O   . ARG A 1 145 ? -12.197 -13.599 -17.722 1.00 7.58  ? ? ? ? ? ? 143  ARG A O   1 
ATOM   1119 C  CB  . ARG A 1 145 ? -9.229  -12.144 -17.354 1.00 12.75 ? ? ? ? ? ? 143  ARG A CB  1 
ATOM   1120 C  CG  . ARG A 1 145 ? -7.801  -12.121 -17.813 1.00 10.65 ? ? ? ? ? ? 143  ARG A CG  1 
ATOM   1121 C  CD  . ARG A 1 145 ? -6.861  -11.600 -16.720 1.00 13.39 ? ? ? ? ? ? 143  ARG A CD  1 
ATOM   1122 N  NE  . ARG A 1 145 ? -5.558  -11.347 -17.313 1.00 16.54 ? ? ? ? ? ? 143  ARG A NE  1 
ATOM   1123 C  CZ  . ARG A 1 145 ? -4.875  -10.216 -17.199 1.00 14.22 ? ? ? ? ? ? 143  ARG A CZ  1 
ATOM   1124 N  NH1 . ARG A 1 145 ? -5.343  -9.209  -16.468 1.00 10.73 ? ? ? ? ? ? 143  ARG A NH1 1 
ATOM   1125 N  NH2 . ARG A 1 145 ? -3.716  -10.100 -17.826 1.00 11.80 ? ? ? ? ? ? 143  ARG A NH2 1 
ATOM   1126 N  N   . LEU A 1 146 ? -12.229 -11.363 -17.446 1.00 8.61  ? ? ? ? ? ? 144  LEU A N   1 
ATOM   1127 C  CA  . LEU A 1 146 ? -13.541 -11.361 -16.813 1.00 8.36  ? ? ? ? ? ? 144  LEU A CA  1 
ATOM   1128 C  C   . LEU A 1 146 ? -14.611 -11.913 -17.741 1.00 12.22 ? ? ? ? ? ? 144  LEU A C   1 
ATOM   1129 O  O   . LEU A 1 146 ? -15.533 -12.611 -17.297 1.00 10.41 ? ? ? ? ? ? 144  LEU A O   1 
ATOM   1130 C  CB  . LEU A 1 146 ? -13.895 -9.934  -16.386 1.00 9.20  ? ? ? ? ? ? 144  LEU A CB  1 
ATOM   1131 C  CG  . LEU A 1 146 ? -13.092 -9.416  -15.194 1.00 9.57  ? ? ? ? ? ? 144  LEU A CG  1 
ATOM   1132 C  CD1 . LEU A 1 146 ? -13.056 -7.886  -15.201 1.00 9.82  ? ? ? ? ? ? 144  LEU A CD1 1 
ATOM   1133 C  CD2 . LEU A 1 146 ? -13.715 -9.948  -13.911 1.00 10.60 ? ? ? ? ? ? 144  LEU A CD2 1 
ATOM   1134 N  N   . LEU A 1 147 ? -14.505 -11.614 -19.037 1.00 11.27 ? ? ? ? ? ? 145  LEU A N   1 
ATOM   1135 C  CA  . LEU A 1 147 ? -15.518 -12.059 -19.987 1.00 10.38 ? ? ? ? ? ? 145  LEU A CA  1 
ATOM   1136 C  C   . LEU A 1 147 ? -15.411 -13.555 -20.255 1.00 9.04  ? ? ? ? ? ? 145  LEU A C   1 
ATOM   1137 O  O   . LEU A 1 147 ? -16.426 -14.221 -20.484 1.00 8.21  ? ? ? ? ? ? 145  LEU A O   1 
ATOM   1138 C  CB  . LEU A 1 147 ? -15.378 -11.270 -21.284 1.00 8.58  ? ? ? ? ? ? 145  LEU A CB  1 
ATOM   1139 C  CG  . LEU A 1 147 ? -15.882 -9.820  -21.221 1.00 13.29 ? ? ? ? ? ? 145  LEU A CG  1 
ATOM   1140 C  CD1 . LEU A 1 147 ? -15.937 -9.237  -22.628 1.00 12.05 ? ? ? ? ? ? 145  LEU A CD1 1 
ATOM   1141 C  CD2 . LEU A 1 147 ? -17.247 -9.744  -20.548 1.00 11.51 ? ? ? ? ? ? 145  LEU A CD2 1 
ATOM   1142 N  N   . LYS A 1 148 ? -14.191 -14.093 -20.268 1.00 7.32  ? ? ? ? ? ? 146  LYS A N   1 
ATOM   1143 C  CA  . LYS A 1 148 ? -14.032 -15.537 -20.419 1.00 11.02 ? ? ? ? ? ? 146  LYS A CA  1 
ATOM   1144 C  C   . LYS A 1 148 ? -14.531 -16.270 -19.182 1.00 10.25 ? ? ? ? ? ? 146  LYS A C   1 
ATOM   1145 O  O   . LYS A 1 148 ? -15.218 -17.289 -19.295 1.00 9.56  ? ? ? ? ? ? 146  LYS A O   1 
ATOM   1146 C  CB  . LYS A 1 148 ? -12.569 -15.892 -20.703 1.00 9.05  ? ? ? ? ? ? 146  LYS A CB  1 
ATOM   1147 C  CG  . LYS A 1 148 ? -12.073 -15.369 -22.048 1.00 13.85 ? ? ? ? ? ? 146  LYS A CG  1 
ATOM   1148 C  CD  . LYS A 1 148 ? -10.563 -15.502 -22.200 1.00 18.70 ? ? ? ? ? ? 146  LYS A CD  1 
ATOM   1149 C  CE  . LYS A 1 148 ? -10.160 -16.908 -22.630 1.00 23.43 ? ? ? ? ? ? 146  LYS A CE  1 
ATOM   1150 N  NZ  . LYS A 1 148 ? -8.786  -16.975 -23.226 1.00 25.78 ? ? ? ? ? ? 146  LYS A NZ  1 
ATOM   1151 N  N   . LEU A 1 149 ? -14.225 -15.753 -17.991 1.00 11.10 ? ? ? ? ? ? 147  LEU A N   1 
ATOM   1152 C  CA  . LEU A 1 149 ? -14.708 -16.401 -16.769 1.00 10.73 ? ? ? ? ? ? 147  LEU A CA  1 
ATOM   1153 C  C   . LEU A 1 149 ? -16.223 -16.349 -16.678 1.00 12.40 ? ? ? ? ? ? 147  LEU A C   1 
ATOM   1154 O  O   . LEU A 1 149 ? -16.862 -17.323 -16.259 1.00 12.33 ? ? ? ? ? ? 147  LEU A O   1 
ATOM   1155 C  CB  . LEU A 1 149 ? -14.084 -15.752 -15.534 1.00 7.63  ? ? ? ? ? ? 147  LEU A CB  1 
ATOM   1156 C  CG  . LEU A 1 149 ? -12.582 -16.012 -15.413 1.00 8.66  ? ? ? ? ? ? 147  LEU A CG  1 
ATOM   1157 C  CD1 . LEU A 1 149 ? -11.907 -15.005 -14.491 1.00 11.58 ? ? ? ? ? ? 147  LEU A CD1 1 
ATOM   1158 C  CD2 . LEU A 1 149 ? -12.308 -17.453 -14.934 1.00 9.42  ? ? ? ? ? ? 147  LEU A CD2 1 
ATOM   1159 N  N   . THR A 1 150 ? -16.814 -15.223 -17.062 1.00 8.93  ? ? ? ? ? ? 148  THR A N   1 
ATOM   1160 C  CA  . THR A 1 150 ? -18.262 -15.093 -16.993 1.00 8.33  ? ? ? ? ? ? 148  THR A CA  1 
ATOM   1161 C  C   . THR A 1 150 ? -18.947 -16.090 -17.926 1.00 10.33 ? ? ? ? ? ? 148  THR A C   1 
ATOM   1162 O  O   . THR A 1 150 ? -19.908 -16.760 -17.534 1.00 10.00 ? ? ? ? ? ? 148  THR A O   1 
ATOM   1163 C  CB  . THR A 1 150 ? -18.665 -13.656 -17.328 1.00 11.17 ? ? ? ? ? ? 148  THR A CB  1 
ATOM   1164 O  OG1 . THR A 1 150 ? -18.086 -12.755 -16.364 1.00 13.28 ? ? ? ? ? ? 148  THR A OG1 1 
ATOM   1165 C  CG2 . THR A 1 150 ? -20.180 -13.514 -17.318 1.00 14.18 ? ? ? ? ? ? 148  THR A CG2 1 
ATOM   1166 N  N   . ALA A 1 151 ? -18.468 -16.200 -19.174 1.00 10.18 ? ? ? ? ? ? 149  ALA A N   1 
ATOM   1167 C  CA  . ALA A 1 151 ? -19.007 -17.221 -20.075 1.00 11.82 ? ? ? ? ? ? 149  ALA A CA  1 
ATOM   1168 C  C   . ALA A 1 151 ? -18.871 -18.615 -19.467 1.00 11.70 ? ? ? ? ? ? 149  ALA A C   1 
ATOM   1169 O  O   . ALA A 1 151 ? -19.841 -19.379 -19.413 1.00 10.41 ? ? ? ? ? ? 149  ALA A O   1 
ATOM   1170 C  CB  . ALA A 1 151 ? -18.300 -17.161 -21.435 1.00 10.94 ? ? ? ? ? ? 149  ALA A CB  1 
ATOM   1171 N  N   . LEU A 1 152 ? -17.671 -18.952 -18.994 1.00 7.70  ? ? ? ? ? ? 150  LEU A N   1 
ATOM   1172 C  CA  . LEU A 1 152 ? -17.440 -20.265 -18.402 1.00 11.27 ? ? ? ? ? ? 150  LEU A CA  1 
ATOM   1173 C  C   . LEU A 1 152 ? -18.380 -20.506 -17.227 1.00 15.23 ? ? ? ? ? ? 150  LEU A C   1 
ATOM   1174 O  O   . LEU A 1 152 ? -18.973 -21.585 -17.107 1.00 13.96 ? ? ? ? ? ? 150  LEU A O   1 
ATOM   1175 C  CB  . LEU A 1 152 ? -15.977 -20.384 -17.956 1.00 12.28 ? ? ? ? ? ? 150  LEU A CB  1 
ATOM   1176 C  CG  . LEU A 1 152 ? -14.912 -20.446 -19.055 1.00 10.51 ? ? ? ? ? ? 150  LEU A CG  1 
ATOM   1177 C  CD1 . LEU A 1 152 ? -13.541 -20.274 -18.453 1.00 10.05 ? ? ? ? ? ? 150  LEU A CD1 1 
ATOM   1178 C  CD2 . LEU A 1 152 ? -15.005 -21.781 -19.798 1.00 10.21 ? ? ? ? ? ? 150  LEU A CD2 1 
ATOM   1179 N  N   . GLY A 1 153 ? -18.541 -19.502 -16.362 1.00 10.03 ? ? ? ? ? ? 151  GLY A N   1 
ATOM   1180 C  CA  . GLY A 1 153 ? -19.412 -19.658 -15.214 1.00 12.66 ? ? ? ? ? ? 151  GLY A CA  1 
ATOM   1181 C  C   . GLY A 1 153 ? -20.841 -19.986 -15.593 1.00 14.26 ? ? ? ? ? ? 151  GLY A C   1 
ATOM   1182 O  O   . GLY A 1 153 ? -21.523 -20.722 -14.873 1.00 15.64 ? ? ? ? ? ? 151  GLY A O   1 
ATOM   1183 N  N   . PHE A 1 154 ? -21.315 -19.454 -16.718 1.00 10.30 ? ? ? ? ? ? 152  PHE A N   1 
ATOM   1184 C  CA  . PHE A 1 154 ? -22.647 -19.750 -17.225 1.00 11.10 ? ? ? ? ? ? 152  PHE A CA  1 
ATOM   1185 C  C   . PHE A 1 154 ? -22.675 -21.013 -18.084 1.00 13.98 ? ? ? ? ? ? 152  PHE A C   1 
ATOM   1186 O  O   . PHE A 1 154 ? -23.699 -21.289 -18.720 1.00 12.75 ? ? ? ? ? ? 152  PHE A O   1 
ATOM   1187 C  CB  . PHE A 1 154 ? -23.190 -18.560 -18.039 1.00 11.18 ? ? ? ? ? ? 152  PHE A CB  1 
ATOM   1188 C  CG  . PHE A 1 154 ? -23.753 -17.438 -17.199 1.00 12.43 ? ? ? ? ? ? 152  PHE A CG  1 
ATOM   1189 C  CD1 . PHE A 1 154 ? -24.739 -17.679 -16.259 1.00 12.49 ? ? ? ? ? ? 152  PHE A CD1 1 
ATOM   1190 C  CD2 . PHE A 1 154 ? -23.291 -16.137 -17.359 1.00 11.69 ? ? ? ? ? ? 152  PHE A CD2 1 
ATOM   1191 C  CE1 . PHE A 1 154 ? -25.261 -16.637 -15.490 1.00 14.96 ? ? ? ? ? ? 152  PHE A CE1 1 
ATOM   1192 C  CE2 . PHE A 1 154 ? -23.802 -15.090 -16.596 1.00 12.68 ? ? ? ? ? ? 152  PHE A CE2 1 
ATOM   1193 C  CZ  . PHE A 1 154 ? -24.786 -15.334 -15.662 1.00 12.26 ? ? ? ? ? ? 152  PHE A CZ  1 
ATOM   1194 N  N   . GLU A 1 155 ? -21.575 -21.768 -18.123 1.00 14.13 ? ? ? ? ? ? 153  GLU A N   1 
ATOM   1195 C  CA  . GLU A 1 155 ? -21.463 -22.992 -18.927 1.00 15.00 ? ? ? ? ? ? 153  GLU A CA  1 
ATOM   1196 C  C   . GLU A 1 155 ? -21.623 -22.711 -20.414 1.00 13.45 ? ? ? ? ? ? 153  GLU A C   1 
ATOM   1197 O  O   . GLU A 1 155 ? -22.153 -23.537 -21.164 1.00 16.87 ? ? ? ? ? ? 153  GLU A O   1 
ATOM   1198 C  CB  . GLU A 1 155 ? -22.468 -24.061 -18.489 1.00 14.40 ? ? ? ? ? ? 153  GLU A CB  1 
ATOM   1199 C  CG  . GLU A 1 155 ? -22.263 -24.539 -17.090 1.00 30.10 ? ? ? ? ? ? 153  GLU A CG  1 
ATOM   1200 C  CD  . GLU A 1 155 ? -22.764 -25.952 -16.898 1.00 25.31 ? ? ? ? ? ? 153  GLU A CD  1 
ATOM   1201 O  OE1 . GLU A 1 155 ? -22.252 -26.606 -15.981 1.00 27.06 ? ? ? ? ? ? 153  GLU A OE1 1 
ATOM   1202 O  OE2 . GLU A 1 155 ? -23.652 -26.401 -17.658 1.00 24.00 ? ? ? ? ? ? 153  GLU A OE2 1 
ATOM   1203 N  N   . LEU A 1 156 ? -21.174 -21.566 -20.838 1.00 13.07 ? ? ? ? ? ? 154  LEU A N   1 
ATOM   1204 C  CA  . LEU A 1 156 ? -21.152 -21.164 -22.234 1.00 14.15 ? ? ? ? ? ? 154  LEU A CA  1 
ATOM   1205 C  C   . LEU A 1 156 ? -19.755 -21.339 -22.807 1.00 13.38 ? ? ? ? ? ? 154  LEU A C   1 
ATOM   1206 O  O   . LEU A 1 156 ? -18.767 -21.344 -22.064 1.00 9.93  ? ? ? ? ? ? 154  LEU A O   1 
ATOM   1207 C  CB  . LEU A 1 156 ? -21.580 -19.703 -22.363 1.00 13.96 ? ? ? ? ? ? 154  LEU A CB  1 
ATOM   1208 C  CG  . LEU A 1 156 ? -22.977 -19.333 -21.883 1.00 17.16 ? ? ? ? ? ? 154  LEU A CG  1 
ATOM   1209 C  CD1 . LEU A 1 156 ? -23.121 -17.806 -21.796 1.00 14.77 ? ? ? ? ? ? 154  LEU A CD1 1 
ATOM   1210 C  CD2 . LEU A 1 156 ? -24.002 -19.918 -22.831 1.00 19.56 ? ? ? ? ? ? 154  LEU A CD2 1 
ATOM   1211 N  N   . PRO A 1 157 ? -19.631 -21.494 -24.129 1.00 13.76 ? ? ? ? ? ? 155  PRO A N   1 
ATOM   1212 C  CA  . PRO A 1 157 ? -18.297 -21.542 -24.735 1.00 12.92 ? ? ? ? ? ? 155  PRO A CA  1 
ATOM   1213 C  C   . PRO A 1 157 ? -17.458 -20.363 -24.263 1.00 15.35 ? ? ? ? ? ? 155  PRO A C   1 
ATOM   1214 O  O   . PRO A 1 157 ? -17.961 -19.242 -24.106 1.00 10.85 ? ? ? ? ? ? 155  PRO A O   1 
ATOM   1215 C  CB  . PRO A 1 157 ? -18.585 -21.478 -26.239 1.00 14.67 ? ? ? ? ? ? 155  PRO A CB  1 
ATOM   1216 C  CG  . PRO A 1 157 ? -19.946 -22.074 -26.377 1.00 19.11 ? ? ? ? ? ? 155  PRO A CG  1 
ATOM   1217 C  CD  . PRO A 1 157 ? -20.697 -21.615 -25.141 1.00 13.99 ? ? ? ? ? ? 155  PRO A CD  1 
ATOM   1218 N  N   . ILE A 1 158 ? -16.171 -20.637 -24.035 1.00 12.34 ? ? ? ? ? ? 156  ILE A N   1 
ATOM   1219 C  CA  . ILE A 1 158 ? -15.273 -19.690 -23.380 1.00 13.82 ? ? ? ? ? ? 156  ILE A CA  1 
ATOM   1220 C  C   . ILE A 1 158 ? -15.207 -18.361 -24.131 1.00 13.19 ? ? ? ? ? ? 156  ILE A C   1 
ATOM   1221 O  O   . ILE A 1 158 ? -15.010 -17.303 -23.520 1.00 14.48 ? ? ? ? ? ? 156  ILE A O   1 
ATOM   1222 C  CB  . ILE A 1 158 ? -13.875 -20.329 -23.219 1.00 12.32 ? ? ? ? ? ? 156  ILE A CB  1 
ATOM   1223 C  CG1 . ILE A 1 158 ? -12.963 -19.459 -22.352 1.00 11.74 ? ? ? ? ? ? 156  ILE A CG1 1 
ATOM   1224 C  CG2 . ILE A 1 158 ? -13.248 -20.629 -24.580 1.00 14.26 ? ? ? ? ? ? 156  ILE A CG2 1 
ATOM   1225 C  CD1 . ILE A 1 158 ? -11.643 -20.127 -21.983 1.00 15.32 ? ? ? ? ? ? 156  ILE A CD1 1 
ATOM   1226 N  N   . ASN A 1 159 ? -15.392 -18.375 -25.447 1.00 11.92 ? ? ? ? ? ? 157  ASN A N   1 
ATOM   1227 C  CA  . ASN A 1 159 ? -15.230 -17.149 -26.216 1.00 15.60 ? ? ? ? ? ? 157  ASN A CA  1 
ATOM   1228 C  C   . ASN A 1 159 ? -16.563 -16.504 -26.591 1.00 14.61 ? ? ? ? ? ? 157  ASN A C   1 
ATOM   1229 O  O   . ASN A 1 159 ? -16.610 -15.687 -27.520 1.00 15.29 ? ? ? ? ? ? 157  ASN A O   1 
ATOM   1230 C  CB  . ASN A 1 159 ? -14.373 -17.420 -27.455 1.00 18.62 ? ? ? ? ? ? 157  ASN A CB  1 
ATOM   1231 C  CG  . ASN A 1 159 ? -12.911 -17.695 -27.099 1.00 27.69 ? ? ? ? ? ? 157  ASN A CG  1 
ATOM   1232 O  OD1 . ASN A 1 159 ? -12.313 -18.655 -27.581 1.00 37.64 ? ? ? ? ? ? 157  ASN A OD1 1 
ATOM   1233 N  ND2 . ASN A 1 159 ? -12.337 -16.853 -26.237 1.00 31.07 ? ? ? ? ? ? 157  ASN A ND2 1 
ATOM   1234 N  N   . THR A 1 160 ? -17.633 -16.819 -25.855 1.00 10.67 ? ? ? ? ? ? 158  THR A N   1 
ATOM   1235 C  CA  . THR A 1 160 ? -18.955 -16.300 -26.191 1.00 12.04 ? ? ? ? ? ? 158  THR A CA  1 
ATOM   1236 C  C   . THR A 1 160 ? -18.965 -14.775 -26.196 1.00 14.29 ? ? ? ? ? ? 158  THR A C   1 
ATOM   1237 O  O   . THR A 1 160 ? -19.387 -14.151 -27.173 1.00 13.09 ? ? ? ? ? ? 158  THR A O   1 
ATOM   1238 C  CB  . THR A 1 160 ? -19.990 -16.860 -25.214 1.00 14.26 ? ? ? ? ? ? 158  THR A CB  1 
ATOM   1239 O  OG1 . THR A 1 160 ? -20.126 -18.273 -25.430 1.00 14.95 ? ? ? ? ? ? 158  THR A OG1 1 
ATOM   1240 C  CG2 . THR A 1 160 ? -21.340 -16.199 -25.422 1.00 13.21 ? ? ? ? ? ? 158  THR A CG2 1 
ATOM   1241 N  N   . PHE A 1 161 ? -18.470 -14.156 -25.121 1.00 12.12 ? ? ? ? ? ? 159  PHE A N   1 
ATOM   1242 C  CA  . PHE A 1 161 ? -18.426 -12.699 -25.060 1.00 11.43 ? ? ? ? ? ? 159  PHE A CA  1 
ATOM   1243 C  C   . PHE A 1 161 ? -17.234 -12.130 -25.822 1.00 11.44 ? ? ? ? ? ? 159  PHE A C   1 
ATOM   1244 O  O   . PHE A 1 161 ? -17.366 -11.100 -26.489 1.00 12.00 ? ? ? ? ? ? 159  PHE A O   1 
ATOM   1245 C  CB  . PHE A 1 161 ? -18.367 -12.223 -23.605 1.00 8.41  ? ? ? ? ? ? 159  PHE A CB  1 
ATOM   1246 C  CG  . PHE A 1 161 ? -19.593 -12.546 -22.798 1.00 13.22 ? ? ? ? ? ? 159  PHE A CG  1 
ATOM   1247 C  CD1 . PHE A 1 161 ? -20.786 -11.892 -23.030 1.00 11.52 ? ? ? ? ? ? 159  PHE A CD1 1 
ATOM   1248 C  CD2 . PHE A 1 161 ? -19.536 -13.482 -21.778 1.00 13.65 ? ? ? ? ? ? 159  PHE A CD2 1 
ATOM   1249 C  CE1 . PHE A 1 161 ? -21.913 -12.179 -22.269 1.00 14.02 ? ? ? ? ? ? 159  PHE A CE1 1 
ATOM   1250 C  CE2 . PHE A 1 161 ? -20.654 -13.772 -21.022 1.00 13.64 ? ? ? ? ? ? 159  PHE A CE2 1 
ATOM   1251 C  CZ  . PHE A 1 161 ? -21.838 -13.124 -21.261 1.00 14.20 ? ? ? ? ? ? 159  PHE A CZ  1 
ATOM   1252 N  N   . THR A 1 162 ? -16.058 -12.756 -25.712 1.00 11.70 ? ? ? ? ? ? 160  THR A N   1 
ATOM   1253 C  CA  . THR A 1 162 ? -14.869 -12.168 -26.326 1.00 13.75 ? ? ? ? ? ? 160  THR A CA  1 
ATOM   1254 C  C   . THR A 1 162 ? -14.912 -12.222 -27.849 1.00 15.69 ? ? ? ? ? ? 160  THR A C   1 
ATOM   1255 O  O   . THR A 1 162 ? -14.212 -11.436 -28.501 1.00 14.05 ? ? ? ? ? ? 160  THR A O   1 
ATOM   1256 C  CB  . THR A 1 162 ? -13.599 -12.846 -25.813 1.00 13.93 ? ? ? ? ? ? 160  THR A CB  1 
ATOM   1257 O  OG1 . THR A 1 162 ? -13.669 -14.258 -26.071 1.00 12.86 ? ? ? ? ? ? 160  THR A OG1 1 
ATOM   1258 C  CG2 . THR A 1 162 ? -13.443 -12.596 -24.313 1.00 15.10 ? ? ? ? ? ? 160  THR A CG2 1 
ATOM   1259 N  N   . ASP A 1 163 ? -15.732 -13.105 -28.431 1.00 14.77 ? ? ? ? ? ? 161  ASP A N   1 
ATOM   1260 C  CA  . ASP A 1 163 ? -15.986 -13.034 -29.869 1.00 16.63 ? ? ? ? ? ? 161  ASP A CA  1 
ATOM   1261 C  C   . ASP A 1 163 ? -16.609 -11.703 -30.259 1.00 20.05 ? ? ? ? ? ? 161  ASP A C   1 
ATOM   1262 O  O   . ASP A 1 163 ? -16.435 -11.245 -31.396 1.00 17.83 ? ? ? ? ? ? 161  ASP A O   1 
ATOM   1263 C  CB  . ASP A 1 163 ? -16.914 -14.165 -30.307 1.00 17.29 ? ? ? ? ? ? 161  ASP A CB  1 
ATOM   1264 C  CG  . ASP A 1 163 ? -16.180 -15.474 -30.542 1.00 22.42 ? ? ? ? ? ? 161  ASP A CG  1 
ATOM   1265 O  OD1 . ASP A 1 163 ? -14.931 -15.495 -30.464 1.00 18.27 ? ? ? ? ? ? 161  ASP A OD1 1 
ATOM   1266 O  OD2 . ASP A 1 163 ? -16.873 -16.482 -30.790 1.00 23.03 ? ? ? ? ? ? 161  ASP A OD2 1 
ATOM   1267 N  N   . LEU A 1 164 ? -17.351 -11.082 -29.337 1.00 14.59 ? ? ? ? ? ? 162  LEU A N   1 
ATOM   1268 C  CA  . LEU A 1 164 ? -18.011 -9.811  -29.591 1.00 15.95 ? ? ? ? ? ? 162  LEU A CA  1 
ATOM   1269 C  C   . LEU A 1 164 ? -17.123 -8.606  -29.330 1.00 16.47 ? ? ? ? ? ? 162  LEU A C   1 
ATOM   1270 O  O   . LEU A 1 164 ? -17.457 -7.509  -29.791 1.00 9.97  ? ? ? ? ? ? 162  LEU A O   1 
ATOM   1271 C  CB  . LEU A 1 164 ? -19.264 -9.678  -28.720 1.00 14.09 ? ? ? ? ? ? 162  LEU A CB  1 
ATOM   1272 C  CG  . LEU A 1 164 ? -20.343 -10.732 -28.956 1.00 16.75 ? ? ? ? ? ? 162  LEU A CG  1 
ATOM   1273 C  CD1 . LEU A 1 164 ? -21.497 -10.526 -27.992 1.00 19.22 ? ? ? ? ? ? 162  LEU A CD1 1 
ATOM   1274 C  CD2 . LEU A 1 164 ? -20.829 -10.667 -30.390 1.00 23.61 ? ? ? ? ? ? 162  LEU A CD2 1 
ATOM   1275 N  N   . THR A 1 165 ? -16.013 -8.780  -28.604 1.00 9.73  ? ? ? ? ? ? 163  THR A N   1 
ATOM   1276 C  CA  . THR A 1 165 ? -15.200 -7.664  -28.130 1.00 9.76  ? ? ? ? ? ? 163  THR A CA  1 
ATOM   1277 C  C   . THR A 1 165 ? -13.851 -7.551  -28.832 1.00 10.65 ? ? ? ? ? ? 163  THR A C   1 
ATOM   1278 O  O   . THR A 1 165 ? -13.003 -6.764  -28.395 1.00 12.13 ? ? ? ? ? ? 163  THR A O   1 
ATOM   1279 C  CB  . THR A 1 165 ? -14.981 -7.769  -26.612 1.00 16.08 ? ? ? ? ? ? 163  THR A CB  1 
ATOM   1280 O  OG1 . THR A 1 165 ? -14.312 -8.998  -26.301 1.00 12.05 ? ? ? ? ? ? 163  THR A OG1 1 
ATOM   1281 C  CG2 . THR A 1 165 ? -16.307 -7.719  -25.873 1.00 10.18 ? ? ? ? ? ? 163  THR A CG2 1 
ATOM   1282 N  N   . ARG A 1 166 ? -13.616 -8.328  -29.890 1.00 12.96 ? ? ? ? ? ? 164  ARG A N   1 
ATOM   1283 C  CA  . ARG A 1 166 ? -12.436 -8.119  -30.725 1.00 13.96 ? ? ? ? ? ? 164  ARG A CA  1 
ATOM   1284 C  C   . ARG A 1 166 ? -12.436 -6.697  -31.255 1.00 11.19 ? ? ? ? ? ? 164  ARG A C   1 
ATOM   1285 O  O   . ARG A 1 166 ? -13.437 -6.242  -31.817 1.00 13.70 ? ? ? ? ? ? 164  ARG A O   1 
ATOM   1286 C  CB  . ARG A 1 166 ? -12.426 -9.110  -31.891 1.00 15.14 ? ? ? ? ? ? 164  ARG A CB  1 
ATOM   1287 C  CG  . ARG A 1 166 ? -12.265 -10.554 -31.448 1.00 20.80 ? ? ? ? ? ? 164  ARG A CG  1 
ATOM   1288 C  CD  . ARG A 1 166 ? -12.423 -11.525 -32.614 1.00 33.92 ? ? ? ? ? ? 164  ARG A CD  1 
ATOM   1289 N  NE  . ARG A 1 166 ? -13.828 -11.763 -32.935 1.00 40.20 ? ? ? ? ? ? 164  ARG A NE  1 
ATOM   1290 C  CZ  . ARG A 1 166 ? -14.285 -12.848 -33.553 1.00 44.14 ? ? ? ? ? ? 164  ARG A CZ  1 
ATOM   1291 N  NH1 . ARG A 1 166 ? -13.447 -13.811 -33.917 1.00 49.46 ? ? ? ? ? ? 164  ARG A NH1 1 
ATOM   1292 N  NH2 . ARG A 1 166 ? -15.584 -12.974 -33.802 1.00 42.75 ? ? ? ? ? ? 164  ARG A NH2 1 
ATOM   1293 N  N   . ASP A 1 167 ? -11.324 -5.987  -31.054 1.00 9.08  ? ? ? ? ? ? 165  ASP A N   1 
ATOM   1294 C  CA  . ASP A 1 167 ? -11.260 -4.551  -31.356 1.00 13.84 ? ? ? ? ? ? 165  ASP A CA  1 
ATOM   1295 C  C   . ASP A 1 167 ? -12.483 -3.841  -30.776 1.00 12.67 ? ? ? ? ? ? 165  ASP A C   1 
ATOM   1296 O  O   . ASP A 1 167 ? -13.108 -2.995  -31.422 1.00 10.88 ? ? ? ? ? ? 165  ASP A O   1 
ATOM   1297 C  CB  . ASP A 1 167 ? -11.133 -4.306  -32.870 1.00 11.69 ? ? ? ? ? ? 165  ASP A CB  1 
ATOM   1298 C  CG  . ASP A 1 167 ? -10.789 -2.850  -33.218 1.00 14.24 ? ? ? ? ? ? 165  ASP A CG  1 
ATOM   1299 O  OD1 . ASP A 1 167 ? -9.945  -2.246  -32.528 1.00 14.78 ? ? ? ? ? ? 165  ASP A OD1 1 
ATOM   1300 O  OD2 . ASP A 1 167 ? -11.359 -2.314  -34.198 1.00 15.19 ? ? ? ? ? ? 165  ASP A OD2 1 
ATOM   1301 N  N   . GLY A 1 168 ? -12.845 -4.228  -29.551 1.00 10.39 ? ? ? ? ? ? 166  GLY A N   1 
ATOM   1302 C  CA  . GLY A 1 168 ? -14.033 -3.686  -28.918 1.00 9.53  ? ? ? ? ? ? 166  GLY A CA  1 
ATOM   1303 C  C   . GLY A 1 168 ? -13.976 -2.178  -28.757 1.00 9.49  ? ? ? ? ? ? 166  GLY A C   1 
ATOM   1304 O  O   . GLY A 1 168 ? -12.914 -1.561  -28.692 1.00 11.77 ? ? ? ? ? ? 166  GLY A O   1 
ATOM   1305 N  N   . TRP A 1 169 ? -15.163 -1.583  -28.681 1.00 8.35  ? ? ? ? ? ? 167  TRP A N   1 
ATOM   1306 C  CA  . TRP A 1 169 ? -15.295 -0.137  -28.556 1.00 8.27  ? ? ? ? ? ? 167  TRP A CA  1 
ATOM   1307 C  C   . TRP A 1 169 ? -15.073 0.293   -27.105 1.00 9.93  ? ? ? ? ? ? 167  TRP A C   1 
ATOM   1308 O  O   . TRP A 1 169 ? -15.920 0.973   -26.512 1.00 11.07 ? ? ? ? ? ? 167  TRP A O   1 
ATOM   1309 C  CB  . TRP A 1 169 ? -16.674 0.302   -29.054 1.00 10.50 ? ? ? ? ? ? 167  TRP A CB  1 
ATOM   1310 C  CG  . TRP A 1 169 ? -16.763 1.767   -29.363 1.00 9.80  ? ? ? ? ? ? 167  TRP A CG  1 
ATOM   1311 C  CD1 . TRP A 1 169 ? -17.454 2.716   -28.669 1.00 8.89  ? ? ? ? ? ? 167  TRP A CD1 1 
ATOM   1312 C  CD2 . TRP A 1 169 ? -16.131 2.441   -30.452 1.00 10.25 ? ? ? ? ? ? 167  TRP A CD2 1 
ATOM   1313 N  NE1 . TRP A 1 169 ? -17.294 3.946   -29.272 1.00 11.38 ? ? ? ? ? ? 167  TRP A NE1 1 
ATOM   1314 C  CE2 . TRP A 1 169 ? -16.481 3.798   -30.365 1.00 9.68  ? ? ? ? ? ? 167  TRP A CE2 1 
ATOM   1315 C  CE3 . TRP A 1 169 ? -15.295 2.021   -31.498 1.00 10.78 ? ? ? ? ? ? 167  TRP A CE3 1 
ATOM   1316 C  CZ2 . TRP A 1 169 ? -16.023 4.746   -31.282 1.00 10.50 ? ? ? ? ? ? 167  TRP A CZ2 1 
ATOM   1317 C  CZ3 . TRP A 1 169 ? -14.843 2.960   -32.402 1.00 12.32 ? ? ? ? ? ? 167  TRP A CZ3 1 
ATOM   1318 C  CH2 . TRP A 1 169 ? -15.207 4.309   -32.289 1.00 8.92  ? ? ? ? ? ? 167  TRP A CH2 1 
ATOM   1319 N  N   . HIS A 1 170 ? -13.933 -0.090  -26.530 1.00 8.55  ? ? ? ? ? ? 168  HIS A N   1 
ATOM   1320 C  CA  . HIS A 1 170 ? -13.664 0.207   -25.127 1.00 8.82  ? ? ? ? ? ? 168  HIS A CA  1 
ATOM   1321 C  C   . HIS A 1 170 ? -13.492 1.701   -24.937 1.00 11.12 ? ? ? ? ? ? 168  HIS A C   1 
ATOM   1322 O  O   . HIS A 1 170 ? -12.884 2.374   -25.769 1.00 10.37 ? ? ? ? ? ? 168  HIS A O   1 
ATOM   1323 C  CB  . HIS A 1 170 ? -12.412 -0.533  -24.671 1.00 9.59  ? ? ? ? ? ? 168  HIS A CB  1 
ATOM   1324 C  CG  . HIS A 1 170 ? -12.416 -1.980  -25.059 1.00 9.77  ? ? ? ? ? ? 168  HIS A CG  1 
ATOM   1325 N  ND1 . HIS A 1 170 ? -13.531 -2.775  -24.911 1.00 8.83  ? ? ? ? ? ? 168  HIS A ND1 1 
ATOM   1326 C  CD2 . HIS A 1 170 ? -11.473 -2.756  -25.645 1.00 11.92 ? ? ? ? ? ? 168  HIS A CD2 1 
ATOM   1327 C  CE1 . HIS A 1 170 ? -13.266 -3.990  -25.362 1.00 9.90  ? ? ? ? ? ? 168  HIS A CE1 1 
ATOM   1328 N  NE2 . HIS A 1 170 ? -12.021 -4.007  -25.806 1.00 11.21 ? ? ? ? ? ? 168  HIS A NE2 1 
ATOM   1329 N  N   . HIS A 1 171 ? -14.032 2.232   -23.842 1.00 9.58  ? ? ? ? ? ? 169  HIS A N   1 
ATOM   1330 C  CA  . HIS A 1 171 ? -13.823 3.644   -23.574 1.00 10.44 ? ? ? ? ? ? 169  HIS A CA  1 
ATOM   1331 C  C   . HIS A 1 171 ? -13.894 3.894   -22.077 1.00 11.39 ? ? ? ? ? ? 169  HIS A C   1 
ATOM   1332 O  O   . HIS A 1 171 ? -14.369 3.059   -21.307 1.00 12.24 ? ? ? ? ? ? 169  HIS A O   1 
ATOM   1333 C  CB  . HIS A 1 171 ? -14.827 4.545   -24.325 1.00 10.00 ? ? ? ? ? ? 169  HIS A CB  1 
ATOM   1334 C  CG  . HIS A 1 171 ? -16.262 4.184   -24.108 1.00 12.96 ? ? ? ? ? ? 169  HIS A CG  1 
ATOM   1335 N  ND1 . HIS A 1 171 ? -16.816 3.016   -24.585 1.00 10.10 ? ? ? ? ? ? 169  HIS A ND1 1 
ATOM   1336 C  CD2 . HIS A 1 171 ? -17.269 4.860   -23.506 1.00 10.94 ? ? ? ? ? ? 169  HIS A CD2 1 
ATOM   1337 C  CE1 . HIS A 1 171 ? -18.099 2.979   -24.273 1.00 9.84  ? ? ? ? ? ? 169  HIS A CE1 1 
ATOM   1338 N  NE2 . HIS A 1 171 ? -18.400 4.087   -23.618 1.00 14.62 ? ? ? ? ? ? 169  HIS A NE2 1 
ATOM   1339 N  N   . MET A 1 172 ? -13.402 5.062   -21.672 1.00 13.20 ? ? ? ? ? ? 170  MET A N   1 
ATOM   1340 C  CA  . MET A 1 172 ? -13.205 5.331   -20.257 1.00 9.42  ? ? ? ? ? ? 170  MET A CA  1 
ATOM   1341 C  C   . MET A 1 172 ? -13.608 6.761   -19.930 1.00 10.14 ? ? ? ? ? ? 170  MET A C   1 
ATOM   1342 O  O   . MET A 1 172 ? -13.318 7.692   -20.684 1.00 9.48  ? ? ? ? ? ? 170  MET A O   1 
ATOM   1343 C  CB  . MET A 1 172 ? -11.747 5.099   -19.850 1.00 7.66  ? ? ? ? ? ? 170  MET A CB  1 
ATOM   1344 C  CG  . MET A 1 172 ? -11.477 5.367   -18.361 1.00 10.94 ? ? ? ? ? ? 170  MET A CG  1 
ATOM   1345 S  SD  . MET A 1 172 ? -9.903  4.668   -17.814 1.00 14.89 ? ? ? ? ? ? 170  MET A SD  1 
ATOM   1346 C  CE  . MET A 1 172 ? -8.771  5.746   -18.684 1.00 14.05 ? ? ? ? ? ? 170  MET A CE  1 
ATOM   1347 N  N   . ARG A 1 173 ? -14.268 6.928   -18.792 1.00 9.27  ? ? ? ? ? ? 171  ARG A N   1 
ATOM   1348 C  CA  . ARG A 1 173 ? -14.616 8.242   -18.268 1.00 9.91  ? ? ? ? ? ? 171  ARG A CA  1 
ATOM   1349 C  C   . ARG A 1 173 ? -13.623 8.578   -17.164 1.00 9.85  ? ? ? ? ? ? 171  ARG A C   1 
ATOM   1350 O  O   . ARG A 1 173 ? -13.563 7.871   -16.156 1.00 13.50 ? ? ? ? ? ? 171  ARG A O   1 
ATOM   1351 C  CB  . ARG A 1 173 ? -16.046 8.246   -17.717 1.00 9.64  ? ? ? ? ? ? 171  ARG A CB  1 
ATOM   1352 C  CG  . ARG A 1 173 ? -17.148 8.368   -18.767 1.00 16.83 ? ? ? ? ? ? 171  ARG A CG  1 
ATOM   1353 C  CD  . ARG A 1 173 ? -18.499 7.902   -18.220 1.00 19.92 ? ? ? ? ? ? 171  ARG A CD  1 
ATOM   1354 N  NE  . ARG A 1 173 ? -19.031 8.747   -17.142 1.00 19.54 ? ? ? ? ? ? 171  ARG A NE  1 
ATOM   1355 C  CZ  . ARG A 1 173 ? -19.579 9.946   -17.327 1.00 21.11 ? ? ? ? ? ? 171  ARG A CZ  1 
ATOM   1356 N  NH1 . ARG A 1 173 ? -19.651 10.472  -18.551 1.00 18.86 ? ? ? ? ? ? 171  ARG A NH1 1 
ATOM   1357 N  NH2 . ARG A 1 173 ? -20.049 10.627  -16.288 1.00 20.30 ? ? ? ? ? ? 171  ARG A NH2 1 
ATOM   1358 N  N   . VAL A 1 174 ? -12.849 9.637   -17.355 1.00 6.80  ? ? ? ? ? ? 172  VAL A N   1 
ATOM   1359 C  CA  . VAL A 1 174 ? -11.909 10.134  -16.354 1.00 9.38  ? ? ? ? ? ? 172  VAL A CA  1 
ATOM   1360 C  C   . VAL A 1 174 ? -12.587 11.302  -15.640 1.00 10.05 ? ? ? ? ? ? 172  VAL A C   1 
ATOM   1361 O  O   . VAL A 1 174 ? -12.842 12.341  -16.255 1.00 9.51  ? ? ? ? ? ? 172  VAL A O   1 
ATOM   1362 C  CB  . VAL A 1 174 ? -10.583 10.557  -17.004 1.00 10.43 ? ? ? ? ? ? 172  VAL A CB  1 
ATOM   1363 C  CG1 . VAL A 1 174 ? -9.544  10.902  -15.937 1.00 8.74  ? ? ? ? ? ? 172  VAL A CG1 1 
ATOM   1364 C  CG2 . VAL A 1 174 ? -10.074 9.440   -17.941 1.00 11.31 ? ? ? ? ? ? 172  VAL A CG2 1 
ATOM   1365 N  N   . LEU A 1 175 ? -12.883 11.144  -14.341 1.00 6.85  ? ? ? ? ? ? 173  LEU A N   1 
ATOM   1366 C  CA  . LEU A 1 175 ? -13.797 12.026  -13.622 1.00 9.54  ? ? ? ? ? ? 173  LEU A CA  1 
ATOM   1367 C  C   . LEU A 1 175 ? -13.112 12.773  -12.487 1.00 7.44  ? ? ? ? ? ? 173  LEU A C   1 
ATOM   1368 O  O   . LEU A 1 175 ? -12.229 12.236  -11.810 1.00 7.67  ? ? ? ? ? ? 173  LEU A O   1 
ATOM   1369 C  CB  . LEU A 1 175 ? -14.987 11.242  -13.026 1.00 9.35  ? ? ? ? ? ? 173  LEU A CB  1 
ATOM   1370 C  CG  . LEU A 1 175 ? -15.783 10.358  -13.992 1.00 14.68 ? ? ? ? ? ? 173  LEU A CG  1 
ATOM   1371 C  CD1 . LEU A 1 175 ? -15.608 8.891   -13.632 1.00 15.65 ? ? ? ? ? ? 173  LEU A CD1 1 
ATOM   1372 C  CD2 . LEU A 1 175 ? -17.247 10.745  -13.962 1.00 19.05 ? ? ? ? ? ? 173  LEU A CD2 1 
ATOM   1373 N  N   . ARG A 1 176 ? -13.541 14.016  -12.276 1.00 10.62 ? ? ? ? ? ? 174  ARG A N   1 
ATOM   1374 C  CA  . ARG A 1 176 ? -13.224 14.762  -11.060 1.00 9.49  ? ? ? ? ? ? 174  ARG A CA  1 
ATOM   1375 C  C   . ARG A 1 176 ? -14.505 15.379  -10.528 1.00 11.10 ? ? ? ? ? ? 174  ARG A C   1 
ATOM   1376 O  O   . ARG A 1 176 ? -15.165 16.148  -11.237 1.00 9.30  ? ? ? ? ? ? 174  ARG A O   1 
ATOM   1377 C  CB  . ARG A 1 176 ? -12.191 15.870  -11.294 1.00 9.96  ? ? ? ? ? ? 174  ARG A CB  1 
ATOM   1378 C  CG  . ARG A 1 176 ? -11.937 16.697  -10.023 1.00 12.00 ? ? ? ? ? ? 174  ARG A CG  1 
ATOM   1379 C  CD  . ARG A 1 176 ? -11.131 17.971  -10.269 1.00 15.93 ? ? ? ? ? ? 174  ARG A CD  1 
ATOM   1380 N  NE  . ARG A 1 176 ? -11.099 18.833  -9.080  1.00 20.33 ? ? ? ? ? ? 174  ARG A NE  1 
ATOM   1381 C  CZ  . ARG A 1 176 ? -12.000 19.777  -8.798  1.00 19.47 ? ? ? ? ? ? 174  ARG A CZ  1 
ATOM   1382 N  NH1 . ARG A 1 176 ? -13.021 20.010  -9.608  1.00 16.76 ? ? ? ? ? ? 174  ARG A NH1 1 
ATOM   1383 N  NH2 . ARG A 1 176 ? -11.877 20.497  -7.694  1.00 15.44 ? ? ? ? ? ? 174  ARG A NH2 1 
ATOM   1384 N  N   . PHE A 1 177 ? -14.845 15.052  -9.286  1.00 10.37 ? ? ? ? ? ? 175  PHE A N   1 
ATOM   1385 C  CA  . PHE A 1 177 ? -15.966 15.645  -8.573  1.00 12.01 ? ? ? ? ? ? 175  PHE A CA  1 
ATOM   1386 C  C   . PHE A 1 177 ? -15.471 16.801  -7.719  1.00 13.50 ? ? ? ? ? ? 175  PHE A C   1 
ATOM   1387 O  O   . PHE A 1 177 ? -14.426 16.689  -7.082  1.00 10.34 ? ? ? ? ? ? 175  PHE A O   1 
ATOM   1388 C  CB  . PHE A 1 177 ? -16.646 14.611  -7.684  1.00 9.33  ? ? ? ? ? ? 175  PHE A CB  1 
ATOM   1389 C  CG  . PHE A 1 177 ? -17.338 13.532  -8.461  1.00 13.65 ? ? ? ? ? ? 175  PHE A CG  1 
ATOM   1390 C  CD1 . PHE A 1 177 ? -18.684 13.636  -8.759  1.00 12.47 ? ? ? ? ? ? 175  PHE A CD1 1 
ATOM   1391 C  CD2 . PHE A 1 177 ? -16.637 12.431  -8.916  1.00 12.64 ? ? ? ? ? ? 175  PHE A CD2 1 
ATOM   1392 C  CE1 . PHE A 1 177 ? -19.331 12.647  -9.476  1.00 12.21 ? ? ? ? ? ? 175  PHE A CE1 1 
ATOM   1393 C  CE2 . PHE A 1 177 ? -17.275 11.442  -9.643  1.00 13.69 ? ? ? ? ? ? 175  PHE A CE2 1 
ATOM   1394 C  CZ  . PHE A 1 177 ? -18.629 11.554  -9.922  1.00 13.41 ? ? ? ? ? ? 175  PHE A CZ  1 
ATOM   1395 N  N   . PRO A 1 178 ? -16.181 17.921  -7.701  1.00 12.23 ? ? ? ? ? ? 176  PRO A N   1 
ATOM   1396 C  CA  . PRO A 1 178 ? -15.788 19.020  -6.831  1.00 13.23 ? ? ? ? ? ? 176  PRO A CA  1 
ATOM   1397 C  C   . PRO A 1 178 ? -16.085 18.676  -5.384  1.00 13.46 ? ? ? ? ? ? 176  PRO A C   1 
ATOM   1398 O  O   . PRO A 1 178 ? -16.851 17.741  -5.101  1.00 9.69  ? ? ? ? ? ? 176  PRO A O   1 
ATOM   1399 C  CB  . PRO A 1 178 ? -16.673 20.177  -7.318  1.00 11.73 ? ? ? ? ? ? 176  PRO A CB  1 
ATOM   1400 C  CG  . PRO A 1 178 ? -17.943 19.482  -7.724  1.00 13.49 ? ? ? ? ? ? 176  PRO A CG  1 
ATOM   1401 C  CD  . PRO A 1 178 ? -17.477 18.176  -8.356  1.00 10.75 ? ? ? ? ? ? 176  PRO A CD  1 
ATOM   1402 N  N   . PRO A 1 179 ? -15.522 19.416  -4.437  1.00 13.25 ? ? ? ? ? ? 177  PRO A N   1 
ATOM   1403 C  CA  . PRO A 1 179 ? -16.015 19.332  -3.060  1.00 13.18 ? ? ? ? ? ? 177  PRO A CA  1 
ATOM   1404 C  C   . PRO A 1 179 ? -17.440 19.859  -2.972  1.00 12.29 ? ? ? ? ? ? 177  PRO A C   1 
ATOM   1405 O  O   . PRO A 1 179 ? -17.905 20.637  -3.811  1.00 10.04 ? ? ? ? ? ? 177  PRO A O   1 
ATOM   1406 C  CB  . PRO A 1 179 ? -15.048 20.231  -2.283  1.00 15.52 ? ? ? ? ? ? 177  PRO A CB  1 
ATOM   1407 C  CG  . PRO A 1 179 ? -14.643 21.261  -3.293  1.00 15.04 ? ? ? ? ? ? 177  PRO A CG  1 
ATOM   1408 C  CD  . PRO A 1 179 ? -14.501 20.467  -4.592  1.00 12.42 ? ? ? ? ? ? 177  PRO A CD  1 
ATOM   1409 N  N   . GLN A 1 180 ? -18.143 19.413  -1.938  1.00 9.07  ? ? ? ? ? ? 178  GLN A N   1 
ATOM   1410 C  CA  . GLN A 1 180 ? -19.470 19.936  -1.653  1.00 9.90  ? ? ? ? ? ? 178  GLN A CA  1 
ATOM   1411 C  C   . GLN A 1 180 ? -19.381 21.437  -1.405  1.00 13.40 ? ? ? ? ? ? 178  GLN A C   1 
ATOM   1412 O  O   . GLN A 1 180 ? -18.433 21.912  -0.781  1.00 13.13 ? ? ? ? ? ? 178  GLN A O   1 
ATOM   1413 C  CB  . GLN A 1 180 ? -20.051 19.255  -0.417  1.00 12.30 ? ? ? ? ? ? 178  GLN A CB  1 
ATOM   1414 C  CG  . GLN A 1 180 ? -21.526 19.451  -0.216  1.00 17.76 ? ? ? ? ? ? 178  GLN A CG  1 
ATOM   1415 C  CD  . GLN A 1 180 ? -22.081 18.500  0.834   1.00 21.39 ? ? ? ? ? ? 178  GLN A CD  1 
ATOM   1416 O  OE1 . GLN A 1 180 ? -21.403 17.562  1.261   1.00 25.61 ? ? ? ? ? ? 178  GLN A OE1 1 
ATOM   1417 N  NE2 . GLN A 1 180 ? -23.330 18.719  1.224   1.00 19.85 ? ? ? ? ? ? 178  GLN A NE2 1 
ATOM   1418 N  N   . THR A 1 181 ? -20.380 22.180  -1.885  1.00 11.05 ? ? ? ? ? ? 179  THR A N   1 
ATOM   1419 C  CA  . THR A 1 181 ? -20.388 23.639  -1.749  1.00 12.32 ? ? ? ? ? ? 179  THR A CA  1 
ATOM   1420 C  C   . THR A 1 181 ? -21.680 24.189  -1.155  1.00 14.42 ? ? ? ? ? ? 179  THR A C   1 
ATOM   1421 O  O   . THR A 1 181 ? -21.774 25.402  -0.921  1.00 16.20 ? ? ? ? ? ? 179  THR A O   1 
ATOM   1422 C  CB  . THR A 1 181 ? -20.147 24.312  -3.114  1.00 10.29 ? ? ? ? ? ? 179  THR A CB  1 
ATOM   1423 O  OG1 . THR A 1 181 ? -21.020 23.750  -4.110  1.00 12.47 ? ? ? ? ? ? 179  THR A OG1 1 
ATOM   1424 C  CG2 . THR A 1 181 ? -18.700 24.130  -3.566  1.00 12.72 ? ? ? ? ? ? 179  THR A CG2 1 
ATOM   1425 N  N   . SER A 1 182 ? -22.673 23.341  -0.917  1.00 14.20 ? ? ? ? ? ? 180  SER A N   1 
ATOM   1426 C  CA  . SER A 1 182 ? -23.951 23.720  -0.322  1.00 18.97 ? ? ? ? ? ? 180  SER A CA  1 
ATOM   1427 C  C   . SER A 1 182 ? -24.506 22.473  0.360   1.00 15.42 ? ? ? ? ? ? 180  SER A C   1 
ATOM   1428 O  O   . SER A 1 182 ? -23.798 21.474  0.512   1.00 16.28 ? ? ? ? ? ? 180  SER A O   1 
ATOM   1429 C  CB  . SER A 1 182 ? -24.902 24.277  -1.386  1.00 17.18 ? ? ? ? ? ? 180  SER A CB  1 
ATOM   1430 O  OG  . SER A 1 182 ? -25.278 23.246  -2.285  1.00 17.46 ? ? ? ? ? ? 180  SER A OG  1 
ATOM   1431 N  N   . THR A 1 183 ? -25.779 22.512  0.763   1.00 14.60 ? ? ? ? ? ? 181  THR A N   1 
ATOM   1432 C  CA  . THR A 1 183 ? -26.356 21.305  1.349   1.00 17.74 ? ? ? ? ? ? 181  THR A CA  1 
ATOM   1433 C  C   . THR A 1 183 ? -26.597 20.211  0.317   1.00 18.04 ? ? ? ? ? ? 181  THR A C   1 
ATOM   1434 O  O   . THR A 1 183 ? -26.920 19.085  0.701   1.00 17.46 ? ? ? ? ? ? 181  THR A O   1 
ATOM   1435 C  CB  . THR A 1 183 ? -27.667 21.619  2.070   1.00 18.04 ? ? ? ? ? ? 181  THR A CB  1 
ATOM   1436 O  OG1 . THR A 1 183 ? -28.606 22.177  1.147   1.00 21.84 ? ? ? ? ? ? 181  THR A OG1 1 
ATOM   1437 C  CG2 . THR A 1 183 ? -27.419 22.588  3.218   1.00 17.57 ? ? ? ? ? ? 181  THR A CG2 1 
ATOM   1438 N  N   . LEU A 1 184 ? -26.436 20.509  -0.966  1.00 17.05 ? ? ? ? ? ? 182  LEU A N   1 
ATOM   1439 C  CA  . LEU A 1 184 ? -26.634 19.525  -2.019  1.00 17.42 ? ? ? ? ? ? 182  LEU A CA  1 
ATOM   1440 C  C   . LEU A 1 184 ? -25.427 18.595  -2.076  1.00 18.43 ? ? ? ? ? ? 182  LEU A C   1 
ATOM   1441 O  O   . LEU A 1 184 ? -24.283 19.050  -2.126  1.00 14.74 ? ? ? ? ? ? 182  LEU A O   1 
ATOM   1442 C  CB  . LEU A 1 184 ? -26.836 20.220  -3.367  1.00 17.26 ? ? ? ? ? ? 182  LEU A CB  1 
ATOM   1443 C  CG  . LEU A 1 184 ? -28.102 21.050  -3.630  1.00 24.77 ? ? ? ? ? ? 182  LEU A CG  1 
ATOM   1444 C  CD1 . LEU A 1 184 ? -28.282 22.238  -2.690  1.00 30.23 ? ? ? ? ? ? 182  LEU A CD1 1 
ATOM   1445 C  CD2 . LEU A 1 184 ? -28.111 21.540  -5.078  1.00 24.75 ? ? ? ? ? ? 182  LEU A CD2 1 
ATOM   1446 N  N   . SER A 1 185 ? -25.677 17.289  -2.055  1.00 15.04 ? ? ? ? ? ? 183  SER A N   1 
ATOM   1447 C  CA  . SER A 1 185 ? -24.588 16.321  -2.067  1.00 16.81 ? ? ? ? ? ? 183  SER A CA  1 
ATOM   1448 C  C   . SER A 1 185 ? -24.680 15.339  -3.229  1.00 16.36 ? ? ? ? ? ? 183  SER A C   1 
ATOM   1449 O  O   . SER A 1 185 ? -23.827 14.450  -3.340  1.00 11.45 ? ? ? ? ? ? 183  SER A O   1 
ATOM   1450 C  CB  . SER A 1 185 ? -24.549 15.547  -0.742  1.00 14.89 ? ? ? ? ? ? 183  SER A CB  1 
ATOM   1451 O  OG  . SER A 1 185 ? -25.767 14.861  -0.552  1.00 18.40 ? ? ? ? ? ? 183  SER A OG  1 
ATOM   1452 N  N   . ARG A 1 186 ? -25.672 15.481  -4.100  1.00 15.11 ? ? ? ? ? ? 184  ARG A N   1 
ATOM   1453 C  CA  . ARG A 1 186 ? -25.869 14.557  -5.218  1.00 18.36 ? ? ? ? ? ? 184  ARG A CA  1 
ATOM   1454 C  C   . ARG A 1 186 ? -24.860 14.877  -6.317  1.00 15.46 ? ? ? ? ? ? 184  ARG A C   1 
ATOM   1455 O  O   . ARG A 1 186 ? -25.059 15.801  -7.101  1.00 19.72 ? ? ? ? ? ? 184  ARG A O   1 
ATOM   1456 C  CB  . ARG A 1 186 ? -27.302 14.658  -5.722  1.00 16.27 ? ? ? ? ? ? 184  ARG A CB  1 
ATOM   1457 C  CG  . ARG A 1 186 ? -27.603 13.897  -7.000  1.00 22.29 ? ? ? ? ? ? 184  ARG A CG  1 
ATOM   1458 C  CD  . ARG A 1 186 ? -28.917 14.381  -7.584  1.00 21.06 ? ? ? ? ? ? 184  ARG A CD  1 
ATOM   1459 N  NE  . ARG A 1 186 ? -29.144 13.892  -8.941  1.00 27.62 ? ? ? ? ? ? 184  ARG A NE  1 
ATOM   1460 C  CZ  . ARG A 1 186 ? -28.526 14.359  -10.021 1.00 29.06 ? ? ? ? ? ? 184  ARG A CZ  1 
ATOM   1461 N  NH1 . ARG A 1 186 ? -27.624 15.333  -9.909  1.00 22.90 ? ? ? ? ? ? 184  ARG A NH1 1 
ATOM   1462 N  NH2 . ARG A 1 186 ? -28.808 13.846  -11.214 1.00 20.18 ? ? ? ? ? ? 184  ARG A NH2 1 
ATOM   1463 N  N   . GLY A 1 187 ? -23.761 14.120  -6.374  1.00 10.12 ? ? ? ? ? ? 185  GLY A N   1 
ATOM   1464 C  CA  . GLY A 1 187 ? -22.754 14.338  -7.404  1.00 10.61 ? ? ? ? ? ? 185  GLY A CA  1 
ATOM   1465 C  C   . GLY A 1 187 ? -23.153 13.833  -8.781  1.00 13.34 ? ? ? ? ? ? 185  GLY A C   1 
ATOM   1466 O  O   . GLY A 1 187 ? -22.962 14.527  -9.783  1.00 11.71 ? ? ? ? ? ? 185  GLY A O   1 
ATOM   1467 N  N   . ILE A 1 188 ? -23.664 12.603  -8.846  1.00 10.41 ? ? ? ? ? ? 186  ILE A N   1 
ATOM   1468 C  CA  . ILE A 1 188 ? -24.380 12.076  -10.010 1.00 14.29 ? ? ? ? ? ? 186  ILE A CA  1 
ATOM   1469 C  C   . ILE A 1 188 ? -25.586 11.307  -9.493  1.00 12.34 ? ? ? ? ? ? 186  ILE A C   1 
ATOM   1470 O  O   . ILE A 1 188 ? -25.482 10.581  -8.502  1.00 13.63 ? ? ? ? ? ? 186  ILE A O   1 
ATOM   1471 C  CB  . ILE A 1 188 ? -23.519 11.139  -10.889 1.00 13.74 ? ? ? ? ? ? 186  ILE A CB  1 
ATOM   1472 C  CG1 . ILE A 1 188 ? -22.122 11.704  -11.123 1.00 20.33 ? ? ? ? ? ? 186  ILE A CG1 1 
ATOM   1473 C  CG2 . ILE A 1 188 ? -24.209 10.861  -12.224 1.00 18.44 ? ? ? ? ? ? 186  ILE A CG2 1 
ATOM   1474 C  CD1 . ILE A 1 188 ? -21.344 10.969  -12.212 1.00 23.80 ? ? ? ? ? ? 186  ILE A CD1 1 
ATOM   1475 N  N   . GLY A 1 189 ? -26.721 11.446  -10.169 1.00 10.07 ? ? ? ? ? ? 187  GLY A N   1 
ATOM   1476 C  CA  . GLY A 1 189 ? -27.907 10.715  -9.771  1.00 15.22 ? ? ? ? ? ? 187  GLY A CA  1 
ATOM   1477 C  C   . GLY A 1 189 ? -27.768 9.220   -9.989  1.00 13.25 ? ? ? ? ? ? 187  GLY A C   1 
ATOM   1478 O  O   . GLY A 1 189 ? -26.859 8.735   -10.662 1.00 10.63 ? ? ? ? ? ? 187  GLY A O   1 
ATOM   1479 N  N   . ALA A 1 190 ? -28.690 8.471   -9.383  1.00 10.32 ? ? ? ? ? ? 188  ALA A N   1 
ATOM   1480 C  CA  . ALA A 1 190 ? -28.748 7.034   -9.612  1.00 12.00 ? ? ? ? ? ? 188  ALA A CA  1 
ATOM   1481 C  C   . ALA A 1 190 ? -28.981 6.740   -11.093 1.00 11.90 ? ? ? ? ? ? 188  ALA A C   1 
ATOM   1482 O  O   . ALA A 1 190 ? -29.822 7.368   -11.745 1.00 11.38 ? ? ? ? ? ? 188  ALA A O   1 
ATOM   1483 C  CB  . ALA A 1 190 ? -29.860 6.406   -8.763  1.00 12.59 ? ? ? ? ? ? 188  ALA A CB  1 
ATOM   1484 N  N   . HIS A 1 191 ? -28.232 5.775   -11.623 1.00 10.02 ? ? ? ? ? ? 189  HIS A N   1 
ATOM   1485 C  CA  . HIS A 1 191 ? -28.329 5.403   -13.030 1.00 9.45  ? ? ? ? ? ? 189  HIS A CA  1 
ATOM   1486 C  C   . HIS A 1 191 ? -27.639 4.058   -13.213 1.00 11.33 ? ? ? ? ? ? 189  HIS A C   1 
ATOM   1487 O  O   . HIS A 1 191 ? -26.925 3.577   -12.325 1.00 10.81 ? ? ? ? ? ? 189  HIS A O   1 
ATOM   1488 C  CB  . HIS A 1 191 ? -27.693 6.458   -13.941 1.00 10.68 ? ? ? ? ? ? 189  HIS A CB  1 
ATOM   1489 C  CG  . HIS A 1 191 ? -26.200 6.515   -13.839 1.00 9.66  ? ? ? ? ? ? 189  HIS A CG  1 
ATOM   1490 N  ND1 . HIS A 1 191 ? -25.552 7.123   -12.785 1.00 12.30 ? ? ? ? ? ? 189  HIS A ND1 1 
ATOM   1491 C  CD2 . HIS A 1 191 ? -25.227 6.033   -14.651 1.00 12.83 ? ? ? ? ? ? 189  HIS A CD2 1 
ATOM   1492 C  CE1 . HIS A 1 191 ? -24.245 7.014   -12.951 1.00 14.77 ? ? ? ? ? ? 189  HIS A CE1 1 
ATOM   1493 N  NE2 . HIS A 1 191 ? -24.020 6.363   -14.079 1.00 15.39 ? ? ? ? ? ? 189  HIS A NE2 1 
ATOM   1494 N  N   . THR A 1 192 ? -27.863 3.450   -14.378 1.00 9.72  ? ? ? ? ? ? 190  THR A N   1 
ATOM   1495 C  CA  . THR A 1 192 ? -27.145 2.246   -14.773 1.00 10.88 ? ? ? ? ? ? 190  THR A CA  1 
ATOM   1496 C  C   . THR A 1 192 ? -26.331 2.566   -16.019 1.00 13.66 ? ? ? ? ? ? 190  THR A C   1 
ATOM   1497 O  O   . THR A 1 192 ? -26.679 3.465   -16.792 1.00 11.50 ? ? ? ? ? ? 190  THR A O   1 
ATOM   1498 C  CB  . THR A 1 192 ? -28.089 1.044   -15.028 1.00 10.99 ? ? ? ? ? ? 190  THR A CB  1 
ATOM   1499 O  OG1 . THR A 1 192 ? -28.995 1.337   -16.109 1.00 11.91 ? ? ? ? ? ? 190  THR A OG1 1 
ATOM   1500 C  CG2 . THR A 1 192 ? -28.890 0.709   -13.766 1.00 9.69  ? ? ? ? ? ? 190  THR A CG2 1 
ATOM   1501 N  N   . ASP A 1 193 ? -25.211 1.866   -16.184 1.00 11.21 ? ? ? ? ? ? 191  ASP A N   1 
ATOM   1502 C  CA  . ASP A 1 193 ? -24.319 2.111   -17.310 1.00 11.51 ? ? ? ? ? ? 191  ASP A CA  1 
ATOM   1503 C  C   . ASP A 1 193 ? -24.800 1.344   -18.540 1.00 14.74 ? ? ? ? ? ? 191  ASP A C   1 
ATOM   1504 O  O   . ASP A 1 193 ? -25.298 0.221   -18.435 1.00 9.56  ? ? ? ? ? ? 191  ASP A O   1 
ATOM   1505 C  CB  . ASP A 1 193 ? -22.882 1.718   -16.959 1.00 8.69  ? ? ? ? ? ? 191  ASP A CB  1 
ATOM   1506 C  CG  . ASP A 1 193 ? -22.168 2.785   -16.128 1.00 15.67 ? ? ? ? ? ? 191  ASP A CG  1 
ATOM   1507 O  OD1 . ASP A 1 193 ? -22.627 3.958   -16.087 1.00 12.78 ? ? ? ? ? ? 191  ASP A OD1 1 
ATOM   1508 O  OD2 . ASP A 1 193 ? -21.135 2.447   -15.516 1.00 13.91 ? ? ? ? ? ? 191  ASP A OD2 1 
ATOM   1509 N  N   . TYR A 1 194 ? -24.649 1.959   -19.711 1.00 11.36 ? ? ? ? ? ? 192  TYR A N   1 
ATOM   1510 C  CA  . TYR A 1 194 ? -25.287 1.455   -20.925 1.00 15.50 ? ? ? ? ? ? 192  TYR A CA  1 
ATOM   1511 C  C   . TYR A 1 194 ? -24.527 0.310   -21.587 1.00 14.04 ? ? ? ? ? ? 192  TYR A C   1 
ATOM   1512 O  O   . TYR A 1 194 ? -25.051 -0.301  -22.529 1.00 16.15 ? ? ? ? ? ? 192  TYR A O   1 
ATOM   1513 C  CB  . TYR A 1 194 ? -25.439 2.597   -21.934 1.00 12.41 ? ? ? ? ? ? 192  TYR A CB  1 
ATOM   1514 C  CG  . TYR A 1 194 ? -24.151 3.359   -22.132 1.00 12.58 ? ? ? ? ? ? 192  TYR A CG  1 
ATOM   1515 C  CD1 . TYR A 1 194 ? -23.950 4.579   -21.504 1.00 15.85 ? ? ? ? ? ? 192  TYR A CD1 1 
ATOM   1516 C  CD2 . TYR A 1 194 ? -23.124 2.852   -22.930 1.00 12.77 ? ? ? ? ? ? 192  TYR A CD2 1 
ATOM   1517 C  CE1 . TYR A 1 194 ? -22.771 5.278   -21.664 1.00 15.31 ? ? ? ? ? ? 192  TYR A CE1 1 
ATOM   1518 C  CE2 . TYR A 1 194 ? -21.931 3.543   -23.085 1.00 11.18 ? ? ? ? ? ? 192  TYR A CE2 1 
ATOM   1519 C  CZ  . TYR A 1 194 ? -21.769 4.758   -22.447 1.00 15.67 ? ? ? ? ? ? 192  TYR A CZ  1 
ATOM   1520 O  OH  . TYR A 1 194 ? -20.605 5.473   -22.577 1.00 16.29 ? ? ? ? ? ? 192  TYR A OH  1 
ATOM   1521 N  N   . GLY A 1 195 ? -23.308 0.019   -21.147 1.00 14.30 ? ? ? ? ? ? 193  GLY A N   1 
ATOM   1522 C  CA  . GLY A 1 195 ? -22.425 -0.873  -21.862 1.00 16.00 ? ? ? ? ? ? 193  GLY A CA  1 
ATOM   1523 C  C   . GLY A 1 195 ? -22.454 -2.303  -21.365 1.00 14.88 ? ? ? ? ? ? 193  GLY A C   1 
ATOM   1524 O  O   . GLY A 1 195 ? -23.403 -2.760  -20.716 1.00 11.61 ? ? ? ? ? ? 193  GLY A O   1 
ATOM   1525 N  N   . LEU A 1 196 ? -21.384 -3.024  -21.684 1.00 10.99 ? ? ? ? ? ? 194  LEU A N   1 
ATOM   1526 C  CA  . LEU A 1 196 ? -21.282 -4.451  -21.382 1.00 14.69 ? ? ? ? ? ? 194  LEU A CA  1 
ATOM   1527 C  C   . LEU A 1 196 ? -20.748 -4.669  -19.967 1.00 14.40 ? ? ? ? ? ? 194  LEU A C   1 
ATOM   1528 O  O   . LEU A 1 196 ? -21.460 -5.178  -19.092 1.00 11.68 ? ? ? ? ? ? 194  LEU A O   1 
ATOM   1529 C  CB  . LEU A 1 196 ? -20.399 -5.116  -22.441 1.00 9.15  ? ? ? ? ? ? 194  LEU A CB  1 
ATOM   1530 C  CG  . LEU A 1 196 ? -20.265 -6.624  -22.304 1.00 10.64 ? ? ? ? ? ? 194  LEU A CG  1 
ATOM   1531 C  CD1 . LEU A 1 196 ? -21.628 -7.272  -22.551 1.00 10.79 ? ? ? ? ? ? 194  LEU A CD1 1 
ATOM   1532 C  CD2 . LEU A 1 196 ? -19.192 -7.168  -23.252 1.00 13.52 ? ? ? ? ? ? 194  LEU A CD2 1 
ATOM   1533 N  N   . LEU A 1 197 ? -19.499 -4.276  -19.726 1.00 10.24 ? ? ? ? ? ? 195  LEU A N   1 
ATOM   1534 C  CA  . LEU A 1 197 ? -18.809 -4.527  -18.468 1.00 12.80 ? ? ? ? ? ? 195  LEU A CA  1 
ATOM   1535 C  C   . LEU A 1 197 ? -18.113 -3.253  -18.005 1.00 9.58  ? ? ? ? ? ? 195  LEU A C   1 
ATOM   1536 O  O   . LEU A 1 197 ? -17.517 -2.539  -18.816 1.00 11.22 ? ? ? ? ? ? 195  LEU A O   1 
ATOM   1537 C  CB  . LEU A 1 197 ? -17.791 -5.676  -18.648 1.00 9.03  ? ? ? ? ? ? 195  LEU A CB  1 
ATOM   1538 C  CG  . LEU A 1 197 ? -16.940 -6.147  -17.471 1.00 12.67 ? ? ? ? ? ? 195  LEU A CG  1 
ATOM   1539 C  CD1 . LEU A 1 197 ? -17.737 -7.092  -16.596 1.00 15.23 ? ? ? ? ? ? 195  LEU A CD1 1 
ATOM   1540 C  CD2 . LEU A 1 197 ? -15.678 -6.865  -17.961 1.00 14.27 ? ? ? ? ? ? 195  LEU A CD2 1 
ATOM   1541 N  N   . VAL A 1 198 ? -18.181 -2.963  -16.704 1.00 9.82  ? ? ? ? ? ? 196  VAL A N   1 
ATOM   1542 C  CA  . VAL A 1 198 ? -17.582 -1.752  -16.147 1.00 10.26 ? ? ? ? ? ? 196  VAL A CA  1 
ATOM   1543 C  C   . VAL A 1 198 ? -16.507 -2.143  -15.142 1.00 10.97 ? ? ? ? ? ? 196  VAL A C   1 
ATOM   1544 O  O   . VAL A 1 198 ? -16.754 -2.957  -14.242 1.00 9.41  ? ? ? ? ? ? 196  VAL A O   1 
ATOM   1545 C  CB  . VAL A 1 198 ? -18.636 -0.836  -15.492 1.00 10.33 ? ? ? ? ? ? 196  VAL A CB  1 
ATOM   1546 C  CG1 . VAL A 1 198 ? -17.989 0.452   -15.023 1.00 8.31  ? ? ? ? ? ? 196  VAL A CG1 1 
ATOM   1547 C  CG2 . VAL A 1 198 ? -19.752 -0.534  -16.479 1.00 13.86 ? ? ? ? ? ? 196  VAL A CG2 1 
ATOM   1548 N  N   . ILE A 1 199 ? -15.318 -1.562  -15.302 1.00 6.63  ? ? ? ? ? ? 197  ILE A N   1 
ATOM   1549 C  CA  . ILE A 1 199 ? -14.224 -1.670  -14.340 1.00 6.46  ? ? ? ? ? ? 197  ILE A CA  1 
ATOM   1550 C  C   . ILE A 1 199 ? -13.916 -0.272  -13.837 1.00 10.76 ? ? ? ? ? ? 197  ILE A C   1 
ATOM   1551 O  O   . ILE A 1 199 ? -13.726 0.651   -14.644 1.00 9.33  ? ? ? ? ? ? 197  ILE A O   1 
ATOM   1552 C  CB  . ILE A 1 199 ? -12.967 -2.295  -14.966 1.00 10.25 ? ? ? ? ? ? 197  ILE A CB  1 
ATOM   1553 C  CG1 . ILE A 1 199 ? -13.314 -3.626  -15.627 1.00 8.29  ? ? ? ? ? ? 197  ILE A CG1 1 
ATOM   1554 C  CG2 . ILE A 1 199 ? -11.858 -2.446  -13.906 1.00 7.97  ? ? ? ? ? ? 197  ILE A CG2 1 
ATOM   1555 C  CD1 . ILE A 1 199 ? -12.099 -4.295  -16.311 1.00 10.69 ? ? ? ? ? ? 197  ILE A CD1 1 
ATOM   1556 N  N   . ALA A 1 200 ? -13.863 -0.108  -12.515 1.00 6.08  ? ? ? ? ? ? 198  ALA A N   1 
ATOM   1557 C  CA  . ALA A 1 200 ? -13.761 1.229   -11.944 1.00 8.14  ? ? ? ? ? ? 198  ALA A CA  1 
ATOM   1558 C  C   . ALA A 1 200 ? -12.588 1.314   -10.974 1.00 13.53 ? ? ? ? ? ? 198  ALA A C   1 
ATOM   1559 O  O   . ALA A 1 200 ? -12.260 0.352   -10.277 1.00 11.36 ? ? ? ? ? ? 198  ALA A O   1 
ATOM   1560 C  CB  . ALA A 1 200 ? -15.078 1.629   -11.236 1.00 12.99 ? ? ? ? ? ? 198  ALA A CB  1 
ATOM   1561 N  N   . ALA A 1 201 ? -11.944 2.479   -10.955 1.00 10.17 ? ? ? ? ? ? 199  ALA A N   1 
ATOM   1562 C  CA  . ALA A 1 201 ? -10.886 2.781   -10.005 1.00 11.00 ? ? ? ? ? ? 199  ALA A CA  1 
ATOM   1563 C  C   . ALA A 1 201 ? -11.207 4.120   -9.362  1.00 11.86 ? ? ? ? ? ? 199  ALA A C   1 
ATOM   1564 O  O   . ALA A 1 201 ? -11.864 4.967   -9.967  1.00 10.82 ? ? ? ? ? ? 199  ALA A O   1 
ATOM   1565 C  CB  . ALA A 1 201 ? -9.502  2.825   -10.674 1.00 10.78 ? ? ? ? ? ? 199  ALA A CB  1 
ATOM   1566 N  N   . GLN A 1 202 ? -10.764 4.305   -8.124  1.00 10.30 ? ? ? ? ? ? 200  GLN A N   1 
ATOM   1567 C  CA  . GLN A 1 202 ? -11.046 5.557   -7.430  1.00 10.93 ? ? ? ? ? ? 200  GLN A CA  1 
ATOM   1568 C  C   . GLN A 1 202 ? -9.861  5.923   -6.545  1.00 12.13 ? ? ? ? ? ? 200  GLN A C   1 
ATOM   1569 O  O   . GLN A 1 202 ? -9.032  5.071   -6.207  1.00 9.85  ? ? ? ? ? ? 200  GLN A O   1 
ATOM   1570 C  CB  . GLN A 1 202 ? -12.327 5.451   -6.594  1.00 11.69 ? ? ? ? ? ? 200  GLN A CB  1 
ATOM   1571 C  CG  . GLN A 1 202 ? -12.237 4.408   -5.465  1.00 8.98  ? ? ? ? ? ? 200  GLN A CG  1 
ATOM   1572 C  CD  . GLN A 1 202 ? -13.491 4.366   -4.620  1.00 13.75 ? ? ? ? ? ? 200  GLN A CD  1 
ATOM   1573 O  OE1 . GLN A 1 202 ? -14.113 5.398   -4.383  1.00 11.01 ? ? ? ? ? ? 200  GLN A OE1 1 
ATOM   1574 N  NE2 . GLN A 1 202 ? -13.878 3.167   -4.167  1.00 7.73  ? ? ? ? ? ? 200  GLN A NE2 1 
ATOM   1575 N  N   . ASP A 1 203 ? -9.789  7.207   -6.171  1.00 12.35 ? ? ? ? ? ? 201  ASP A N   1 
ATOM   1576 C  CA  . ASP A 1 203 ? -8.814  7.670   -5.190  1.00 11.77 ? ? ? ? ? ? 201  ASP A CA  1 
ATOM   1577 C  C   . ASP A 1 203 ? -9.316  7.305   -3.794  1.00 11.81 ? ? ? ? ? ? 201  ASP A C   1 
ATOM   1578 O  O   . ASP A 1 203 ? -10.251 6.512   -3.634  1.00 13.42 ? ? ? ? ? ? 201  ASP A O   1 
ATOM   1579 C  CB  . ASP A 1 203 ? -8.515  9.170   -5.361  1.00 9.98  ? ? ? ? ? ? 201  ASP A CB  1 
ATOM   1580 C  CG  . ASP A 1 203 ? -9.712  10.075  -5.072  1.00 11.23 ? ? ? ? ? ? 201  ASP A CG  1 
ATOM   1581 O  OD1 . ASP A 1 203 ? -10.733 9.624   -4.509  1.00 13.17 ? ? ? ? ? ? 201  ASP A OD1 1 
ATOM   1582 O  OD2 . ASP A 1 203 ? -9.615  11.276  -5.408  1.00 13.07 ? ? ? ? ? ? 201  ASP A OD2 1 
ATOM   1583 N  N   . ASP A 1 204 ? -8.705  7.873   -2.753  1.00 11.83 ? ? ? ? ? ? 202  ASP A N   1 
ATOM   1584 C  CA  . ASP A 1 204 ? -9.027  7.456   -1.393  1.00 17.36 ? ? ? ? ? ? 202  ASP A CA  1 
ATOM   1585 C  C   . ASP A 1 204 ? -10.075 8.336   -0.716  1.00 15.02 ? ? ? ? ? ? 202  ASP A C   1 
ATOM   1586 O  O   . ASP A 1 204 ? -10.332 8.160   0.481   1.00 12.97 ? ? ? ? ? ? 202  ASP A O   1 
ATOM   1587 C  CB  . ASP A 1 204 ? -7.751  7.376   -0.546  1.00 19.73 ? ? ? ? ? ? 202  ASP A CB  1 
ATOM   1588 C  CG  . ASP A 1 204 ? -7.034  8.711   -0.404  1.00 25.28 ? ? ? ? ? ? 202  ASP A CG  1 
ATOM   1589 O  OD1 . ASP A 1 204 ? -7.555  9.757   -0.849  1.00 23.42 ? ? ? ? ? ? 202  ASP A OD1 1 
ATOM   1590 O  OD2 . ASP A 1 204 ? -5.920  8.701   0.159   1.00 37.10 ? ? ? ? ? ? 202  ASP A OD2 1 
ATOM   1591 N  N   . VAL A 1 205 ? -10.733 9.229   -1.457  1.00 12.43 ? ? ? ? ? ? 203  VAL A N   1 
ATOM   1592 C  CA  . VAL A 1 205 ? -11.642 10.188  -0.825  1.00 13.25 ? ? ? ? ? ? 203  VAL A CA  1 
ATOM   1593 C  C   . VAL A 1 205 ? -12.968 9.531   -0.449  1.00 15.57 ? ? ? ? ? ? 203  VAL A C   1 
ATOM   1594 O  O   . VAL A 1 205 ? -13.471 9.711   0.667   1.00 16.67 ? ? ? ? ? ? 203  VAL A O   1 
ATOM   1595 C  CB  . VAL A 1 205 ? -11.842 11.417  -1.737  1.00 12.87 ? ? ? ? ? ? 203  VAL A CB  1 
ATOM   1596 C  CG1 . VAL A 1 205 ? -12.972 12.326  -1.216  1.00 11.87 ? ? ? ? ? ? 203  VAL A CG1 1 
ATOM   1597 C  CG2 . VAL A 1 205 ? -10.531 12.204  -1.839  1.00 12.01 ? ? ? ? ? ? 203  VAL A CG2 1 
ATOM   1598 N  N   . GLY A 1 206 ? -13.569 8.782   -1.369  1.00 9.65  ? ? ? ? ? ? 204  GLY A N   1 
ATOM   1599 C  CA  . GLY A 1 206 ? -14.817 8.096   -1.080  1.00 8.76  ? ? ? ? ? ? 204  GLY A CA  1 
ATOM   1600 C  C   . GLY A 1 206 ? -16.042 8.824   -1.591  1.00 9.73  ? ? ? ? ? ? 204  GLY A C   1 
ATOM   1601 O  O   . GLY A 1 206 ? -16.093 10.054  -1.547  1.00 10.04 ? ? ? ? ? ? 204  GLY A O   1 
ATOM   1602 N  N   . GLY A 1 207 ? -17.027 8.082   -2.094  1.00 11.12 ? ? ? ? ? ? 205  GLY A N   1 
ATOM   1603 C  CA  . GLY A 1 207 ? -18.261 8.695   -2.535  1.00 11.06 ? ? ? ? ? ? 205  GLY A CA  1 
ATOM   1604 C  C   . GLY A 1 207 ? -19.111 7.876   -3.489  1.00 13.07 ? ? ? ? ? ? 205  GLY A C   1 
ATOM   1605 O  O   . GLY A 1 207 ? -20.252 8.265   -3.772  1.00 8.07  ? ? ? ? ? ? 205  GLY A O   1 
ATOM   1606 N  N   . LEU A 1 208 ? -18.589 6.754   -4.002  1.00 8.44  ? ? ? ? ? ? 206  LEU A N   1 
ATOM   1607 C  CA  . LEU A 1 208 ? -19.367 5.913   -4.910  1.00 9.31  ? ? ? ? ? ? 206  LEU A CA  1 
ATOM   1608 C  C   . LEU A 1 208 ? -20.283 4.981   -4.120  1.00 9.07  ? ? ? ? ? ? 206  LEU A C   1 
ATOM   1609 O  O   . LEU A 1 208 ? -19.843 4.309   -3.181  1.00 9.00  ? ? ? ? ? ? 206  LEU A O   1 
ATOM   1610 C  CB  . LEU A 1 208 ? -18.443 5.088   -5.807  1.00 10.04 ? ? ? ? ? ? 206  LEU A CB  1 
ATOM   1611 C  CG  . LEU A 1 208 ? -19.119 4.069   -6.727  1.00 12.05 ? ? ? ? ? ? 206  LEU A CG  1 
ATOM   1612 C  CD1 . LEU A 1 208 ? -19.997 4.772   -7.791  1.00 10.53 ? ? ? ? ? ? 206  LEU A CD1 1 
ATOM   1613 C  CD2 . LEU A 1 208 ? -18.050 3.197   -7.382  1.00 12.88 ? ? ? ? ? ? 206  LEU A CD2 1 
ATOM   1614 N  N   . TYR A 1 209 ? -21.555 4.943   -4.499  1.00 8.00  ? ? ? ? ? ? 207  TYR A N   1 
ATOM   1615 C  CA  . TYR A 1 209 ? -22.521 4.012   -3.934  1.00 9.91  ? ? ? ? ? ? 207  TYR A CA  1 
ATOM   1616 C  C   . TYR A 1 209 ? -23.100 3.148   -5.039  1.00 7.60  ? ? ? ? ? ? 207  TYR A C   1 
ATOM   1617 O  O   . TYR A 1 209 ? -23.414 3.646   -6.122  1.00 9.20  ? ? ? ? ? ? 207  TYR A O   1 
ATOM   1618 C  CB  . TYR A 1 209 ? -23.662 4.739   -3.236  1.00 9.93  ? ? ? ? ? ? 207  TYR A CB  1 
ATOM   1619 C  CG  . TYR A 1 209 ? -23.266 5.407   -1.944  1.00 13.82 ? ? ? ? ? ? 207  TYR A CG  1 
ATOM   1620 C  CD1 . TYR A 1 209 ? -23.558 4.812   -0.718  1.00 13.85 ? ? ? ? ? ? 207  TYR A CD1 1 
ATOM   1621 C  CD2 . TYR A 1 209 ? -22.612 6.633   -1.945  1.00 15.05 ? ? ? ? ? ? 207  TYR A CD2 1 
ATOM   1622 C  CE1 . TYR A 1 209 ? -23.208 5.416   0.469   1.00 16.42 ? ? ? ? ? ? 207  TYR A CE1 1 
ATOM   1623 C  CE2 . TYR A 1 209 ? -22.250 7.242   -0.759  1.00 16.66 ? ? ? ? ? ? 207  TYR A CE2 1 
ATOM   1624 C  CZ  . TYR A 1 209 ? -22.560 6.627   0.441   1.00 16.48 ? ? ? ? ? ? 207  TYR A CZ  1 
ATOM   1625 O  OH  . TYR A 1 209 ? -22.226 7.216   1.624   1.00 21.85 ? ? ? ? ? ? 207  TYR A OH  1 
ATOM   1626 N  N   . ILE A 1 210 ? -23.261 1.859   -4.763  1.00 7.91  ? ? ? ? ? ? 208  ILE A N   1 
ATOM   1627 C  CA  . ILE A 1 210 ? -23.884 0.962   -5.726  1.00 5.76  ? ? ? ? ? ? 208  ILE A CA  1 
ATOM   1628 C  C   . ILE A 1 210 ? -25.075 0.277   -5.067  1.00 8.36  ? ? ? ? ? ? 208  ILE A C   1 
ATOM   1629 O  O   . ILE A 1 210 ? -25.173 0.183   -3.843  1.00 7.94  ? ? ? ? ? ? 208  ILE A O   1 
ATOM   1630 C  CB  . ILE A 1 210 ? -22.881 -0.068  -6.308  1.00 7.09  ? ? ? ? ? ? 208  ILE A CB  1 
ATOM   1631 C  CG1 . ILE A 1 210 ? -22.330 -1.011  -5.231  1.00 8.62  ? ? ? ? ? ? 208  ILE A CG1 1 
ATOM   1632 C  CG2 . ILE A 1 210 ? -21.721 0.679   -7.031  1.00 5.99  ? ? ? ? ? ? 208  ILE A CG2 1 
ATOM   1633 C  CD1 . ILE A 1 210 ? -23.125 -2.292  -5.061  1.00 9.18  ? ? ? ? ? ? 208  ILE A CD1 1 
ATOM   1634 N  N   . ARG A 1 211 ? -25.996 -0.191  -5.908  1.00 9.73  ? ? ? ? ? ? 209  ARG A N   1 
ATOM   1635 C  CA  . ARG A 1 211 ? -27.182 -0.901  -5.445  1.00 9.47  ? ? ? ? ? ? 209  ARG A CA  1 
ATOM   1636 C  C   . ARG A 1 211 ? -27.074 -2.380  -5.794  1.00 7.23  ? ? ? ? ? ? 209  ARG A C   1 
ATOM   1637 O  O   . ARG A 1 211 ? -26.997 -2.730  -6.985  1.00 10.72 ? ? ? ? ? ? 209  ARG A O   1 
ATOM   1638 C  CB  . ARG A 1 211 ? -28.447 -0.301  -6.069  1.00 9.13  ? ? ? ? ? ? 209  ARG A CB  1 
ATOM   1639 C  CG  . ARG A 1 211 ? -29.736 -0.919  -5.510  1.00 10.99 ? ? ? ? ? ? 209  ARG A CG  1 
ATOM   1640 C  CD  . ARG A 1 211 ? -30.960 -0.175  -6.029  1.00 12.38 ? ? ? ? ? ? 209  ARG A CD  1 
ATOM   1641 N  NE  . ARG A 1 211 ? -32.179 -0.415  -5.246  1.00 11.64 ? ? ? ? ? ? 209  ARG A NE  1 
ATOM   1642 C  CZ  . ARG A 1 211 ? -32.432 0.148   -4.066  1.00 11.96 ? ? ? ? ? ? 209  ARG A CZ  1 
ATOM   1643 N  NH1 . ARG A 1 211 ? -31.544 0.960   -3.507  1.00 9.75  ? ? ? ? ? ? 209  ARG A NH1 1 
ATOM   1644 N  NH2 . ARG A 1 211 ? -33.575 -0.104  -3.437  1.00 13.20 ? ? ? ? ? ? 209  ARG A NH2 1 
ATOM   1645 N  N   . PRO A 1 212 ? -27.076 -3.281  -4.814  1.00 9.17  ? ? ? ? ? ? 210  PRO A N   1 
ATOM   1646 C  CA  . PRO A 1 212 ? -27.087 -4.707  -5.127  1.00 7.57  ? ? ? ? ? ? 210  PRO A CA  1 
ATOM   1647 C  C   . PRO A 1 212 ? -28.449 -5.116  -5.653  1.00 12.77 ? ? ? ? ? ? 210  PRO A C   1 
ATOM   1648 O  O   . PRO A 1 212 ? -29.418 -4.351  -5.539  1.00 8.62  ? ? ? ? ? ? 210  PRO A O   1 
ATOM   1649 C  CB  . PRO A 1 212 ? -26.801 -5.367  -3.772  1.00 8.30  ? ? ? ? ? ? 210  PRO A CB  1 
ATOM   1650 C  CG  . PRO A 1 212 ? -27.501 -4.430  -2.794  1.00 12.42 ? ? ? ? ? ? 210  PRO A CG  1 
ATOM   1651 C  CD  . PRO A 1 212 ? -27.275 -3.020  -3.377  1.00 7.89  ? ? ? ? ? ? 210  PRO A CD  1 
ATOM   1652 N  N   . PRO A 1 213 ? -28.569 -6.305  -6.234  1.00 13.74 ? ? ? ? ? ? 211  PRO A N   1 
ATOM   1653 C  CA  . PRO A 1 213 ? -29.907 -6.829  -6.541  1.00 13.55 ? ? ? ? ? ? 211  PRO A CA  1 
ATOM   1654 C  C   . PRO A 1 213 ? -30.738 -6.926  -5.268  1.00 12.98 ? ? ? ? ? ? 211  PRO A C   1 
ATOM   1655 O  O   . PRO A 1 213 ? -30.223 -7.243  -4.194  1.00 13.67 ? ? ? ? ? ? 211  PRO A O   1 
ATOM   1656 C  CB  . PRO A 1 213 ? -29.618 -8.213  -7.133  1.00 11.86 ? ? ? ? ? ? 211  PRO A CB  1 
ATOM   1657 C  CG  . PRO A 1 213 ? -28.212 -8.084  -7.687  1.00 12.10 ? ? ? ? ? ? 211  PRO A CG  1 
ATOM   1658 C  CD  . PRO A 1 213 ? -27.498 -7.206  -6.695  1.00 12.55 ? ? ? ? ? ? 211  PRO A CD  1 
ATOM   1659 N  N   . VAL A 1 214 ? -32.031 -6.629  -5.390  1.00 13.34 ? ? ? ? ? ? 212  VAL A N   1 
ATOM   1660 C  CA  . VAL A 1 214 ? -32.943 -6.586  -4.248  1.00 14.25 ? ? ? ? ? ? 212  VAL A CA  1 
ATOM   1661 C  C   . VAL A 1 214 ? -34.111 -7.523  -4.522  1.00 19.72 ? ? ? ? ? ? 212  VAL A C   1 
ATOM   1662 O  O   . VAL A 1 214 ? -34.807 -7.377  -5.538  1.00 17.87 ? ? ? ? ? ? 212  VAL A O   1 
ATOM   1663 C  CB  . VAL A 1 214 ? -33.451 -5.161  -3.972  1.00 13.73 ? ? ? ? ? ? 212  VAL A CB  1 
ATOM   1664 C  CG1 . VAL A 1 214 ? -34.557 -5.203  -2.920  1.00 13.86 ? ? ? ? ? ? 212  VAL A CG1 1 
ATOM   1665 C  CG2 . VAL A 1 214 ? -32.311 -4.275  -3.513  1.00 14.03 ? ? ? ? ? ? 212  VAL A CG2 1 
ATOM   1666 N  N   . GLU A 1 215 ? -34.326 -8.475  -3.613  1.00 20.25 ? ? ? ? ? ? 213  GLU A N   1 
ATOM   1667 C  CA  . GLU A 1 215 ? -35.449 -9.400  -3.718  1.00 23.62 ? ? ? ? ? ? 213  GLU A CA  1 
ATOM   1668 C  C   . GLU A 1 215 ? -36.775 -8.647  -3.730  1.00 21.56 ? ? ? ? ? ? 213  GLU A C   1 
ATOM   1669 O  O   . GLU A 1 215 ? -37.048 -7.830  -2.848  1.00 20.34 ? ? ? ? ? ? 213  GLU A O   1 
ATOM   1670 C  CB  . GLU A 1 215 ? -35.420 -10.384 -2.546  1.00 23.77 ? ? ? ? ? ? 213  GLU A CB  1 
ATOM   1671 C  CG  . GLU A 1 215 ? -36.552 -11.393 -2.563  1.00 33.63 ? ? ? ? ? ? 213  GLU A CG  1 
ATOM   1672 C  CD  . GLU A 1 215 ? -36.477 -12.308 -3.762  1.00 49.32 ? ? ? ? ? ? 213  GLU A CD  1 
ATOM   1673 O  OE1 . GLU A 1 215 ? -35.561 -13.157 -3.802  1.00 61.69 ? ? ? ? ? ? 213  GLU A OE1 1 
ATOM   1674 O  OE2 . GLU A 1 215 ? -37.326 -12.174 -4.668  1.00 58.36 ? ? ? ? ? ? 213  GLU A OE2 1 
ATOM   1675 N  N   . GLY A 1 216 ? -37.595 -8.916  -4.740  1.00 20.06 ? ? ? ? ? ? 214  GLY A N   1 
ATOM   1676 C  CA  . GLY A 1 216 ? -38.894 -8.289  -4.835  1.00 17.99 ? ? ? ? ? ? 214  GLY A CA  1 
ATOM   1677 C  C   . GLY A 1 216 ? -38.921 -6.936  -5.503  1.00 22.85 ? ? ? ? ? ? 214  GLY A C   1 
ATOM   1678 O  O   . GLY A 1 216 ? -39.980 -6.295  -5.520  1.00 19.22 ? ? ? ? ? ? 214  GLY A O   1 
ATOM   1679 N  N   . GLU A 1 217 ? -37.803 -6.480  -6.062  1.00 16.56 ? ? ? ? ? ? 215  GLU A N   1 
ATOM   1680 C  CA  . GLU A 1 217 ? -37.711 -5.166  -6.692  1.00 17.96 ? ? ? ? ? ? 215  GLU A CA  1 
ATOM   1681 C  C   . GLU A 1 217 ? -37.576 -5.352  -8.202  1.00 21.65 ? ? ? ? ? ? 215  GLU A C   1 
ATOM   1682 O  O   . GLU A 1 217 ? -36.573 -5.894  -8.681  1.00 18.49 ? ? ? ? ? ? 215  GLU A O   1 
ATOM   1683 C  CB  . GLU A 1 217 ? -36.526 -4.394  -6.113  1.00 13.21 ? ? ? ? ? ? 215  GLU A CB  1 
ATOM   1684 C  CG  . GLU A 1 217 ? -36.300 -3.010  -6.693  1.00 16.41 ? ? ? ? ? ? 215  GLU A CG  1 
ATOM   1685 C  CD  . GLU A 1 217 ? -35.197 -2.283  -5.951  1.00 15.79 ? ? ? ? ? ? 215  GLU A CD  1 
ATOM   1686 O  OE1 . GLU A 1 217 ? -35.487 -1.664  -4.892  1.00 18.85 ? ? ? ? ? ? 215  GLU A OE1 1 
ATOM   1687 O  OE2 . GLU A 1 217 ? -34.031 -2.345  -6.415  1.00 14.27 ? ? ? ? ? ? 215  GLU A OE2 1 
ATOM   1688 N  N   . LYS A 1 218 ? -38.587 -4.907  -8.944  1.00 19.35 ? ? ? ? ? ? 216  LYS A N   1 
ATOM   1689 C  CA  . LYS A 1 218 ? -38.553 -4.975  -10.403 1.00 22.41 ? ? ? ? ? ? 216  LYS A CA  1 
ATOM   1690 C  C   . LYS A 1 218 ? -37.557 -3.955  -10.953 1.00 19.24 ? ? ? ? ? ? 216  LYS A C   1 
ATOM   1691 O  O   . LYS A 1 218 ? -37.534 -2.806  -10.509 1.00 18.61 ? ? ? ? ? ? 216  LYS A O   1 
ATOM   1692 C  CB  . LYS A 1 218 ? -39.955 -4.709  -10.956 1.00 25.01 ? ? ? ? ? ? 216  LYS A CB  1 
ATOM   1693 C  CG  . LYS A 1 218 ? -40.018 -4.318  -12.421 1.00 33.56 ? ? ? ? ? ? 216  LYS A CG  1 
ATOM   1694 C  CD  . LYS A 1 218 ? -41.397 -4.597  -12.999 1.00 39.90 ? ? ? ? ? ? 216  LYS A CD  1 
ATOM   1695 C  CE  . LYS A 1 218 ? -41.743 -3.596  -14.089 1.00 51.25 ? ? ? ? ? ? 216  LYS A CE  1 
ATOM   1696 N  NZ  . LYS A 1 218 ? -41.619 -4.186  -15.452 1.00 58.27 ? ? ? ? ? ? 216  LYS A NZ  1 
ATOM   1697 N  N   . ARG A 1 219 ? -36.730 -4.371  -11.911 1.00 12.60 ? ? ? ? ? ? 217  ARG A N   1 
ATOM   1698 C  CA  . ARG A 1 219 ? -35.716 -3.500  -12.491 1.00 12.73 ? ? ? ? ? ? 217  ARG A CA  1 
ATOM   1699 C  C   . ARG A 1 219 ? -36.080 -3.168  -13.931 1.00 17.76 ? ? ? ? ? ? 217  ARG A C   1 
ATOM   1700 O  O   . ARG A 1 219 ? -36.498 -4.047  -14.688 1.00 15.03 ? ? ? ? ? ? 217  ARG A O   1 
ATOM   1701 C  CB  . ARG A 1 219 ? -34.332 -4.150  -12.445 1.00 11.35 ? ? ? ? ? ? 217  ARG A CB  1 
ATOM   1702 C  CG  . ARG A 1 219 ? -33.736 -4.234  -11.032 1.00 10.14 ? ? ? ? ? ? 217  ARG A CG  1 
ATOM   1703 C  CD  . ARG A 1 219 ? -33.445 -2.836  -10.464 1.00 11.41 ? ? ? ? ? ? 217  ARG A CD  1 
ATOM   1704 N  NE  . ARG A 1 219 ? -32.962 -2.947  -9.093  1.00 13.37 ? ? ? ? ? ? 217  ARG A NE  1 
ATOM   1705 C  CZ  . ARG A 1 219 ? -31.734 -3.326  -8.752  1.00 11.87 ? ? ? ? ? ? 217  ARG A CZ  1 
ATOM   1706 N  NH1 . ARG A 1 219 ? -30.834 -3.609  -9.690  1.00 12.57 ? ? ? ? ? ? 217  ARG A NH1 1 
ATOM   1707 N  NH2 . ARG A 1 219 ? -31.404 -3.412  -7.466  1.00 11.31 ? ? ? ? ? ? 217  ARG A NH2 1 
ATOM   1708 N  N   . ASN A 1 220 ? -35.922 -1.900  -14.304 1.00 17.36 ? ? ? ? ? ? 218  ASN A N   1 
ATOM   1709 C  CA  . ASN A 1 220 ? -36.158 -1.498  -15.683 1.00 14.06 ? ? ? ? ? ? 218  ASN A CA  1 
ATOM   1710 C  C   . ASN A 1 220 ? -35.044 -2.004  -16.590 1.00 19.10 ? ? ? ? ? ? 218  ASN A C   1 
ATOM   1711 O  O   . ASN A 1 220 ? -33.913 -2.247  -16.157 1.00 12.67 ? ? ? ? ? ? 218  ASN A O   1 
ATOM   1712 C  CB  . ASN A 1 220 ? -36.253 0.021   -15.810 1.00 12.74 ? ? ? ? ? ? 218  ASN A CB  1 
ATOM   1713 C  CG  . ASN A 1 220 ? -37.654 0.532   -15.559 1.00 20.53 ? ? ? ? ? ? 218  ASN A CG  1 
ATOM   1714 O  OD1 . ASN A 1 220 ? -38.556 -0.249  -15.275 1.00 23.33 ? ? ? ? ? ? 218  ASN A OD1 1 
ATOM   1715 N  ND2 . ASN A 1 220 ? -37.844 1.842   -15.672 1.00 17.42 ? ? ? ? ? ? 218  ASN A ND2 1 
ATOM   1716 N  N   . ARG A 1 221 ? -35.381 -2.152  -17.872 1.00 16.26 ? ? ? ? ? ? 219  ARG A N   1 
ATOM   1717 C  CA  . ARG A 1 221 ? -34.428 -2.539  -18.915 1.00 16.12 ? ? ? ? ? ? 219  ARG A CA  1 
ATOM   1718 C  C   . ARG A 1 221 ? -33.999 -1.249  -19.612 1.00 16.06 ? ? ? ? ? ? 219  ARG A C   1 
ATOM   1719 O  O   . ARG A 1 221 ? -34.661 -0.768  -20.535 1.00 15.30 ? ? ? ? ? ? 219  ARG A O   1 
ATOM   1720 C  CB  . ARG A 1 221 ? -35.060 -3.549  -19.870 1.00 14.05 ? ? ? ? ? ? 219  ARG A CB  1 
ATOM   1721 C  CG  . ARG A 1 221 ? -35.449 -4.867  -19.190 1.00 17.84 ? ? ? ? ? ? 219  ARG A CG  1 
ATOM   1722 C  CD  . ARG A 1 221 ? -36.383 -5.695  -20.065 1.00 18.52 ? ? ? ? ? ? 219  ARG A CD  1 
ATOM   1723 N  NE  . ARG A 1 221 ? -37.689 -5.055  -20.184 1.00 22.32 ? ? ? ? ? ? 219  ARG A NE  1 
ATOM   1724 C  CZ  . ARG A 1 221 ? -38.681 -5.512  -20.943 1.00 27.30 ? ? ? ? ? ? 219  ARG A CZ  1 
ATOM   1725 N  NH1 . ARG A 1 221 ? -38.520 -6.610  -21.661 1.00 25.73 ? ? ? ? ? ? 219  ARG A NH1 1 
ATOM   1726 N  NH2 . ARG A 1 221 ? -39.832 -4.859  -20.990 1.00 28.68 ? ? ? ? ? ? 219  ARG A NH2 1 
ATOM   1727 N  N   . ASN A 1 222 ? -32.884 -0.670  -19.142 1.00 15.25 ? ? ? ? ? ? 220  ASN A N   1 
ATOM   1728 C  CA  . ASN A 1 222 ? -32.507 0.692   -19.521 1.00 13.19 ? ? ? ? ? ? 220  ASN A CA  1 
ATOM   1729 C  C   . ASN A 1 222 ? -32.105 0.825   -20.988 1.00 13.95 ? ? ? ? ? ? 220  ASN A C   1 
ATOM   1730 O  O   . ASN A 1 222 ? -31.950 1.952   -21.470 1.00 18.46 ? ? ? ? ? ? 220  ASN A O   1 
ATOM   1731 C  CB  . ASN A 1 222 ? -31.375 1.193   -18.612 1.00 11.97 ? ? ? ? ? ? 220  ASN A CB  1 
ATOM   1732 C  CG  . ASN A 1 222 ? -31.099 2.684   -18.776 1.00 13.90 ? ? ? ? ? ? 220  ASN A CG  1 
ATOM   1733 O  OD1 . ASN A 1 222 ? -31.996 3.523   -18.625 1.00 13.70 ? ? ? ? ? ? 220  ASN A OD1 1 
ATOM   1734 N  ND2 . ASN A 1 222 ? -29.850 3.021   -19.082 1.00 10.80 ? ? ? ? ? ? 220  ASN A ND2 1 
ATOM   1735 N  N   . TRP A 1 223 ? -31.954 -0.274  -21.719 1.00 16.87 ? ? ? ? ? ? 221  TRP A N   1 
ATOM   1736 C  CA  . TRP A 1 223 ? -31.691 -0.148  -23.148 1.00 15.78 ? ? ? ? ? ? 221  TRP A CA  1 
ATOM   1737 C  C   . TRP A 1 223 ? -32.955 0.151   -23.947 1.00 22.27 ? ? ? ? ? ? 221  TRP A C   1 
ATOM   1738 O  O   . TRP A 1 223 ? -32.860 0.466   -25.139 1.00 22.74 ? ? ? ? ? ? 221  TRP A O   1 
ATOM   1739 C  CB  . TRP A 1 223 ? -31.009 -1.422  -23.681 1.00 15.40 ? ? ? ? ? ? 221  TRP A CB  1 
ATOM   1740 C  CG  . TRP A 1 223 ? -31.805 -2.692  -23.517 1.00 15.48 ? ? ? ? ? ? 221  TRP A CG  1 
ATOM   1741 C  CD1 . TRP A 1 223 ? -32.651 -3.259  -24.429 1.00 17.27 ? ? ? ? ? ? 221  TRP A CD1 1 
ATOM   1742 C  CD2 . TRP A 1 223 ? -31.804 -3.564  -22.379 1.00 16.49 ? ? ? ? ? ? 221  TRP A CD2 1 
ATOM   1743 N  NE1 . TRP A 1 223 ? -33.187 -4.421  -23.924 1.00 14.98 ? ? ? ? ? ? 221  TRP A NE1 1 
ATOM   1744 C  CE2 . TRP A 1 223 ? -32.688 -4.627  -22.664 1.00 14.55 ? ? ? ? ? ? 221  TRP A CE2 1 
ATOM   1745 C  CE3 . TRP A 1 223 ? -31.150 -3.541  -21.141 1.00 14.96 ? ? ? ? ? ? 221  TRP A CE3 1 
ATOM   1746 C  CZ2 . TRP A 1 223 ? -32.921 -5.668  -21.766 1.00 16.75 ? ? ? ? ? ? 221  TRP A CZ2 1 
ATOM   1747 C  CZ3 . TRP A 1 223 ? -31.383 -4.566  -20.249 1.00 10.66 ? ? ? ? ? ? 221  TRP A CZ3 1 
ATOM   1748 C  CH2 . TRP A 1 223 ? -32.265 -5.622  -20.565 1.00 15.85 ? ? ? ? ? ? 221  TRP A CH2 1 
ATOM   1749 N  N   . LEU A 1 224 ? -34.130 0.063   -23.323 1.00 19.39 ? ? ? ? ? ? 222  LEU A N   1 
ATOM   1750 C  CA  . LEU A 1 224 ? -35.378 0.358   -24.010 1.00 22.94 ? ? ? ? ? ? 222  LEU A CA  1 
ATOM   1751 C  C   . LEU A 1 224 ? -35.844 1.777   -23.703 1.00 27.64 ? ? ? ? ? ? 222  LEU A C   1 
ATOM   1752 O  O   . LEU A 1 224 ? -35.781 2.219   -22.548 1.00 24.69 ? ? ? ? ? ? 222  LEU A O   1 
ATOM   1753 C  CB  . LEU A 1 224 ? -36.456 -0.641  -23.599 1.00 20.16 ? ? ? ? ? ? 222  LEU A CB  1 
ATOM   1754 C  CG  . LEU A 1 224 ? -36.044 -2.079  -23.929 1.00 21.41 ? ? ? ? ? ? 222  LEU A CG  1 
ATOM   1755 C  CD1 . LEU A 1 224 ? -37.031 -3.065  -23.340 1.00 23.88 ? ? ? ? ? ? 222  LEU A CD1 1 
ATOM   1756 C  CD2 . LEU A 1 224 ? -35.918 -2.273  -25.446 1.00 21.49 ? ? ? ? ? ? 222  LEU A CD2 1 
ATOM   1757 N  N   . PRO A 1 225 ? -36.316 2.501   -24.723 1.00 27.10 ? ? ? ? ? ? 223  PRO A N   1 
ATOM   1758 C  CA  . PRO A 1 225 ? -36.580 3.943   -24.537 1.00 31.59 ? ? ? ? ? ? 223  PRO A CA  1 
ATOM   1759 C  C   . PRO A 1 225 ? -37.593 4.268   -23.449 1.00 31.62 ? ? ? ? ? ? 223  PRO A C   1 
ATOM   1760 O  O   . PRO A 1 225 ? -37.428 5.274   -22.745 1.00 34.67 ? ? ? ? ? ? 223  PRO A O   1 
ATOM   1761 C  CB  . PRO A 1 225 ? -37.068 4.392   -25.925 1.00 39.77 ? ? ? ? ? ? 223  PRO A CB  1 
ATOM   1762 C  CG  . PRO A 1 225 ? -37.385 3.119   -26.679 1.00 41.50 ? ? ? ? ? ? 223  PRO A CG  1 
ATOM   1763 C  CD  . PRO A 1 225 ? -36.468 2.079   -26.124 1.00 32.28 ? ? ? ? ? ? 223  PRO A CD  1 
ATOM   1764 N  N   . GLY A 1 226 ? -38.634 3.459   -23.281 1.00 24.28 ? ? ? ? ? ? 224  GLY A N   1 
ATOM   1765 C  CA  . GLY A 1 226 ? -39.611 3.758   -22.252 1.00 27.19 ? ? ? ? ? ? 224  GLY A CA  1 
ATOM   1766 C  C   . GLY A 1 226 ? -39.319 3.193   -20.876 1.00 27.88 ? ? ? ? ? ? 224  GLY A C   1 
ATOM   1767 O  O   . GLY A 1 226 ? -40.189 3.256   -20.001 1.00 28.04 ? ? ? ? ? ? 224  GLY A O   1 
ATOM   1768 N  N   . GLU A 1 227 ? -38.126 2.647   -20.645 1.00 22.67 ? ? ? ? ? ? 225  GLU A N   1 
ATOM   1769 C  CA  . GLU A 1 227 ? -37.797 1.987   -19.383 1.00 20.94 ? ? ? ? ? ? 225  GLU A CA  1 
ATOM   1770 C  C   . GLU A 1 227 ? -36.477 2.502   -18.826 1.00 20.81 ? ? ? ? ? ? 225  GLU A C   1 
ATOM   1771 O  O   . GLU A 1 227 ? -35.591 1.734   -18.438 1.00 17.84 ? ? ? ? ? ? 225  GLU A O   1 
ATOM   1772 C  CB  . GLU A 1 227 ? -37.748 0.476   -19.557 1.00 21.35 ? ? ? ? ? ? 225  GLU A CB  1 
ATOM   1773 C  CG  . GLU A 1 227 ? -39.113 -0.161  -19.597 1.00 25.61 ? ? ? ? ? ? 225  GLU A CG  1 
ATOM   1774 C  CD  . GLU A 1 227 ? -39.060 -1.670  -19.614 1.00 23.68 ? ? ? ? ? ? 225  GLU A CD  1 
ATOM   1775 O  OE1 . GLU A 1 227 ? -38.135 -2.255  -19.007 1.00 24.22 ? ? ? ? ? ? 225  GLU A OE1 1 
ATOM   1776 O  OE2 . GLU A 1 227 ? -39.958 -2.277  -20.234 1.00 32.47 ? ? ? ? ? ? 225  GLU A OE2 1 
ATOM   1777 N  N   . SER A 1 228 ? -36.334 3.821   -18.777 1.00 21.21 ? ? ? ? ? ? 226  SER A N   1 
ATOM   1778 C  CA  . SER A 1 228 ? -35.128 4.411   -18.222 1.00 17.06 ? ? ? ? ? ? 226  SER A CA  1 
ATOM   1779 C  C   . SER A 1 228 ? -34.963 4.010   -16.764 1.00 17.32 ? ? ? ? ? ? 226  SER A C   1 
ATOM   1780 O  O   . SER A 1 228 ? -35.921 4.001   -15.986 1.00 17.53 ? ? ? ? ? ? 226  SER A O   1 
ATOM   1781 C  CB  . SER A 1 228 ? -35.170 5.935   -18.344 1.00 16.40 ? ? ? ? ? ? 226  SER A CB  1 
ATOM   1782 O  OG  . SER A 1 228 ? -34.069 6.504   -17.667 1.00 15.00 ? ? ? ? ? ? 226  SER A OG  1 
ATOM   1783 N  N   . SER A 1 229 ? -33.738 3.646   -16.404 1.00 14.87 ? ? ? ? ? ? 227  SER A N   1 
ATOM   1784 C  CA  . SER A 1 229 ? -33.384 3.381   -15.018 1.00 13.96 ? ? ? ? ? ? 227  SER A CA  1 
ATOM   1785 C  C   . SER A 1 229 ? -32.888 4.633   -14.305 1.00 15.16 ? ? ? ? ? ? 227  SER A C   1 
ATOM   1786 O  O   . SER A 1 229 ? -32.508 4.554   -13.137 1.00 15.63 ? ? ? ? ? ? 227  SER A O   1 
ATOM   1787 C  CB  . SER A 1 229 ? -32.319 2.284   -14.965 1.00 9.03  ? ? ? ? ? ? 227  SER A CB  1 
ATOM   1788 O  OG  . SER A 1 229 ? -31.122 2.741   -15.572 1.00 14.66 ? ? ? ? ? ? 227  SER A OG  1 
ATOM   1789 N  N   . ALA A 1 230 ? -32.888 5.782   -14.976 1.00 12.66 ? ? ? ? ? ? 228  ALA A N   1 
ATOM   1790 C  CA  . ALA A 1 230 ? -32.299 6.984   -14.402 1.00 11.51 ? ? ? ? ? ? 228  ALA A CA  1 
ATOM   1791 C  C   . ALA A 1 230 ? -33.110 7.468   -13.203 1.00 15.70 ? ? ? ? ? ? 228  ALA A C   1 
ATOM   1792 O  O   . ALA A 1 230 ? -34.342 7.568   -13.265 1.00 14.80 ? ? ? ? ? ? 228  ALA A O   1 
ATOM   1793 C  CB  . ALA A 1 230 ? -32.203 8.079   -15.462 1.00 13.64 ? ? ? ? ? ? 228  ALA A CB  1 
ATOM   1794 N  N   . GLY A 1 231 ? -32.411 7.754   -12.104 1.00 14.44 ? ? ? ? ? ? 229  GLY A N   1 
ATOM   1795 C  CA  . GLY A 1 231 ? -33.027 8.240   -10.891 1.00 15.05 ? ? ? ? ? ? 229  GLY A CA  1 
ATOM   1796 C  C   . GLY A 1 231 ? -33.730 7.196   -10.054 1.00 15.78 ? ? ? ? ? ? 229  GLY A C   1 
ATOM   1797 O  O   . GLY A 1 231 ? -34.123 7.499   -8.926  1.00 17.43 ? ? ? ? ? ? 229  GLY A O   1 
ATOM   1798 N  N   . MET A 1 232 ? -33.887 5.971   -10.545 1.00 13.52 ? ? ? ? ? ? 230  MET A N   1 
ATOM   1799 C  CA  . MET A 1 232 ? -34.699 4.996   -9.829  1.00 15.94 ? ? ? ? ? ? 230  MET A CA  1 
ATOM   1800 C  C   . MET A 1 232 ? -33.961 4.464   -8.603  1.00 12.31 ? ? ? ? ? ? 230  MET A C   1 
ATOM   1801 O  O   . MET A 1 232 ? -32.784 4.089   -8.685  1.00 12.02 ? ? ? ? ? ? 230  MET A O   1 
ATOM   1802 C  CB  . MET A 1 232 ? -35.091 3.860   -10.772 1.00 15.86 ? ? ? ? ? ? 230  MET A CB  1 
ATOM   1803 C  CG  . MET A 1 232 ? -36.216 4.261   -11.724 1.00 27.03 ? ? ? ? ? ? 230  MET A CG  1 
ATOM   1804 S  SD  . MET A 1 232 ? -36.950 2.872   -12.591 1.00 39.76 ? ? ? ? ? ? 230  MET A SD  1 
ATOM   1805 C  CE  . MET A 1 232 ? -37.434 1.836   -11.210 1.00 16.86 ? ? ? ? ? ? 230  MET A CE  1 
ATOM   1806 N  N   . PHE A 1 233 ? -34.663 4.443   -7.465  1.00 11.49 ? ? ? ? ? ? 231  PHE A N   1 
ATOM   1807 C  CA  . PHE A 1 233 ? -34.211 3.950   -6.161  1.00 14.31 ? ? ? ? ? ? 231  PHE A CA  1 
ATOM   1808 C  C   . PHE A 1 233 ? -33.213 4.880   -5.485  1.00 14.32 ? ? ? ? ? ? 231  PHE A C   1 
ATOM   1809 O  O   . PHE A 1 233 ? -32.625 4.498   -4.473  1.00 15.98 ? ? ? ? ? ? 231  PHE A O   1 
ATOM   1810 C  CB  . PHE A 1 233 ? -33.594 2.544   -6.243  1.00 12.50 ? ? ? ? ? ? 231  PHE A CB  1 
ATOM   1811 C  CG  . PHE A 1 233 ? -34.347 1.604   -7.139  1.00 12.71 ? ? ? ? ? ? 231  PHE A CG  1 
ATOM   1812 C  CD1 . PHE A 1 233 ? -35.647 1.233   -6.844  1.00 15.76 ? ? ? ? ? ? 231  PHE A CD1 1 
ATOM   1813 C  CD2 . PHE A 1 233 ? -33.757 1.108   -8.292  1.00 14.65 ? ? ? ? ? ? 231  PHE A CD2 1 
ATOM   1814 C  CE1 . PHE A 1 233 ? -36.347 0.375   -7.692  1.00 17.99 ? ? ? ? ? ? 231  PHE A CE1 1 
ATOM   1815 C  CE2 . PHE A 1 233 ? -34.447 0.254   -9.142  1.00 14.34 ? ? ? ? ? ? 231  PHE A CE2 1 
ATOM   1816 C  CZ  . PHE A 1 233 ? -35.739 -0.115  -8.842  1.00 15.53 ? ? ? ? ? ? 231  PHE A CZ  1 
ATOM   1817 N  N   . GLU A 1 234 ? -33.027 6.099   -5.994  1.00 11.15 ? ? ? ? ? ? 232  GLU A N   1 
ATOM   1818 C  CA  . GLU A 1 234 ? -31.965 6.959   -5.480  1.00 16.47 ? ? ? ? ? ? 232  GLU A CA  1 
ATOM   1819 C  C   . GLU A 1 234 ? -32.029 7.110   -3.964  1.00 16.79 ? ? ? ? ? ? 232  GLU A C   1 
ATOM   1820 O  O   . GLU A 1 234 ? -30.990 7.133   -3.291  1.00 16.55 ? ? ? ? ? ? 232  GLU A O   1 
ATOM   1821 C  CB  . GLU A 1 234 ? -32.032 8.333   -6.154  1.00 14.79 ? ? ? ? ? ? 232  GLU A CB  1 
ATOM   1822 C  CG  . GLU A 1 234 ? -30.809 9.201   -5.891  1.00 23.08 ? ? ? ? ? ? 232  GLU A CG  1 
ATOM   1823 C  CD  . GLU A 1 234 ? -30.589 10.241  -6.971  1.00 25.35 ? ? ? ? ? ? 232  GLU A CD  1 
ATOM   1824 O  OE1 . GLU A 1 234 ? -30.708 9.900   -8.166  1.00 23.94 ? ? ? ? ? ? 232  GLU A OE1 1 
ATOM   1825 O  OE2 . GLU A 1 234 ? -30.305 11.406  -6.625  1.00 35.65 ? ? ? ? ? ? 232  GLU A OE2 1 
ATOM   1826 N  N   . HIS A 1 235 ? -33.237 7.187   -3.402  1.00 12.79 ? ? ? ? ? ? 233  HIS A N   1 
ATOM   1827 C  CA  . HIS A 1 235 ? -33.419 7.446   -1.978  1.00 15.87 ? ? ? ? ? ? 233  HIS A CA  1 
ATOM   1828 C  C   . HIS A 1 235 ? -33.931 6.237   -1.198  1.00 18.06 ? ? ? ? ? ? 233  HIS A C   1 
ATOM   1829 O  O   . HIS A 1 235 ? -34.346 6.390   -0.041  1.00 19.49 ? ? ? ? ? ? 233  HIS A O   1 
ATOM   1830 C  CB  . HIS A 1 235 ? -34.359 8.641   -1.799  1.00 19.10 ? ? ? ? ? ? 233  HIS A CB  1 
ATOM   1831 C  CG  . HIS A 1 235 ? -33.869 9.884   -2.473  1.00 23.98 ? ? ? ? ? ? 233  HIS A CG  1 
ATOM   1832 N  ND1 . HIS A 1 235 ? -34.615 10.570  -3.407  1.00 22.91 ? ? ? ? ? ? 233  HIS A ND1 1 
ATOM   1833 C  CD2 . HIS A 1 235 ? -32.699 10.556  -2.359  1.00 23.50 ? ? ? ? ? ? 233  HIS A CD2 1 
ATOM   1834 C  CE1 . HIS A 1 235 ? -33.929 11.616  -3.834  1.00 26.76 ? ? ? ? ? ? 233  HIS A CE1 1 
ATOM   1835 N  NE2 . HIS A 1 235 ? -32.764 11.632  -3.212  1.00 24.03 ? ? ? ? ? ? 233  HIS A NE2 1 
ATOM   1836 N  N   . ASP A 1 236 ? -33.897 5.046   -1.793  1.00 16.13 ? ? ? ? ? ? 234  ASP A N   1 
ATOM   1837 C  CA  . ASP A 1 236 ? -34.311 3.802   -1.154  1.00 14.28 ? ? ? ? ? ? 234  ASP A CA  1 
ATOM   1838 C  C   . ASP A 1 236 ? -33.092 3.004   -0.722  1.00 16.25 ? ? ? ? ? ? 234  ASP A C   1 
ATOM   1839 O  O   . ASP A 1 236 ? -32.155 2.829   -1.502  1.00 13.39 ? ? ? ? ? ? 234  ASP A O   1 
ATOM   1840 C  CB  . ASP A 1 236 ? -35.119 2.916   -2.112  1.00 13.81 ? ? ? ? ? ? 234  ASP A CB  1 
ATOM   1841 C  CG  . ASP A 1 236 ? -36.182 3.671   -2.872  1.00 18.48 ? ? ? ? ? ? 234  ASP A CG  1 
ATOM   1842 O  OD1 . ASP A 1 236 ? -36.737 3.070   -3.819  1.00 20.49 ? ? ? ? ? ? 234  ASP A OD1 1 
ATOM   1843 O  OD2 . ASP A 1 236 ? -36.479 4.833   -2.517  1.00 20.97 ? ? ? ? ? ? 234  ASP A OD2 1 
ATOM   1844 N  N   . GLU A 1 237 ? -33.133 2.463   0.494   1.00 16.21 ? ? ? ? ? ? 235  GLU A N   1 
ATOM   1845 C  CA  . GLU A 1 237 ? -32.169 1.431   0.835   1.00 15.98 ? ? ? ? ? ? 235  GLU A CA  1 
ATOM   1846 C  C   . GLU A 1 237 ? -32.419 0.213   -0.056  1.00 14.24 ? ? ? ? ? ? 235  GLU A C   1 
ATOM   1847 O  O   . GLU A 1 237 ? -33.537 0.017   -0.551  1.00 15.18 ? ? ? ? ? ? 235  GLU A O   1 
ATOM   1848 C  CB  . GLU A 1 237 ? -32.284 1.050   2.312   1.00 15.48 ? ? ? ? ? ? 235  GLU A CB  1 
ATOM   1849 C  CG  . GLU A 1 237 ? -31.651 2.054   3.258   1.00 24.71 ? ? ? ? ? ? 235  GLU A CG  1 
ATOM   1850 C  CD  . GLU A 1 237 ? -30.191 2.356   2.927   1.00 33.04 ? ? ? ? ? ? 235  GLU A CD  1 
ATOM   1851 O  OE1 . GLU A 1 237 ? -29.419 1.409   2.654   1.00 28.15 ? ? ? ? ? ? 235  GLU A OE1 1 
ATOM   1852 O  OE2 . GLU A 1 237 ? -29.811 3.543   2.960   1.00 32.87 ? ? ? ? ? ? 235  GLU A OE2 1 
ATOM   1853 N  N   . PRO A 1 238 ? -31.390 -0.611  -0.309  1.00 10.13 ? ? ? ? ? ? 236  PRO A N   1 
ATOM   1854 C  CA  . PRO A 1 238 ? -30.017 -0.470  0.184   1.00 12.46 ? ? ? ? ? ? 236  PRO A CA  1 
ATOM   1855 C  C   . PRO A 1 238 ? -29.090 0.171   -0.833  1.00 17.10 ? ? ? ? ? ? 236  PRO A C   1 
ATOM   1856 O  O   . PRO A 1 238 ? -29.202 -0.097  -2.031  1.00 12.01 ? ? ? ? ? ? 236  PRO A O   1 
ATOM   1857 C  CB  . PRO A 1 238 ? -29.600 -1.918  0.426   1.00 13.58 ? ? ? ? ? ? 236  PRO A CB  1 
ATOM   1858 C  CG  . PRO A 1 238 ? -30.280 -2.662  -0.707  1.00 13.04 ? ? ? ? ? ? 236  PRO A CG  1 
ATOM   1859 C  CD  . PRO A 1 238 ? -31.571 -1.891  -1.018  1.00 15.75 ? ? ? ? ? ? 236  PRO A CD  1 
ATOM   1860 N  N   . TRP A 1 239 ? -28.162 0.994   -0.362  1.00 13.29 ? ? ? ? ? ? 237  TRP A N   1 
ATOM   1861 C  CA  . TRP A 1 239 ? -27.054 1.457   -1.183  1.00 14.45 ? ? ? ? ? ? 237  TRP A CA  1 
ATOM   1862 C  C   . TRP A 1 239 ? -25.768 1.077   -0.474  1.00 11.56 ? ? ? ? ? ? 237  TRP A C   1 
ATOM   1863 O  O   . TRP A 1 239 ? -25.654 1.239   0.742   1.00 13.07 ? ? ? ? ? ? 237  TRP A O   1 
ATOM   1864 C  CB  . TRP A 1 239 ? -27.111 2.974   -1.435  1.00 12.23 ? ? ? ? ? ? 237  TRP A CB  1 
ATOM   1865 C  CG  . TRP A 1 239 ? -28.150 3.343   -2.453  1.00 10.29 ? ? ? ? ? ? 237  TRP A CG  1 
ATOM   1866 C  CD1 . TRP A 1 239 ? -29.446 3.660   -2.202  1.00 9.91  ? ? ? ? ? ? 237  TRP A CD1 1 
ATOM   1867 C  CD2 . TRP A 1 239 ? -27.995 3.385   -3.884  1.00 12.36 ? ? ? ? ? ? 237  TRP A CD2 1 
ATOM   1868 N  NE1 . TRP A 1 239 ? -30.111 3.903   -3.374  1.00 13.06 ? ? ? ? ? ? 237  TRP A NE1 1 
ATOM   1869 C  CE2 . TRP A 1 239 ? -29.243 3.745   -4.424  1.00 10.38 ? ? ? ? ? ? 237  TRP A CE2 1 
ATOM   1870 C  CE3 . TRP A 1 239 ? -26.919 3.154   -4.759  1.00 9.84  ? ? ? ? ? ? 237  TRP A CE3 1 
ATOM   1871 C  CZ2 . TRP A 1 239 ? -29.450 3.894   -5.796  1.00 10.08 ? ? ? ? ? ? 237  TRP A CZ2 1 
ATOM   1872 C  CZ3 . TRP A 1 239 ? -27.127 3.295   -6.118  1.00 7.80  ? ? ? ? ? ? 237  TRP A CZ3 1 
ATOM   1873 C  CH2 . TRP A 1 239 ? -28.382 3.673   -6.627  1.00 10.74 ? ? ? ? ? ? 237  TRP A CH2 1 
ATOM   1874 N  N   . THR A 1 240 ? -24.817 0.558   -1.235  1.00 10.53 ? ? ? ? ? ? 238  THR A N   1 
ATOM   1875 C  CA  . THR A 1 240 ? -23.552 0.057   -0.713  1.00 11.35 ? ? ? ? ? ? 238  THR A CA  1 
ATOM   1876 C  C   . THR A 1 240 ? -22.468 1.087   -0.990  1.00 11.65 ? ? ? ? ? ? 238  THR A C   1 
ATOM   1877 O  O   . THR A 1 240 ? -22.126 1.331   -2.152  1.00 11.42 ? ? ? ? ? ? 238  THR A O   1 
ATOM   1878 C  CB  . THR A 1 240 ? -23.181 -1.269  -1.382  1.00 12.49 ? ? ? ? ? ? 238  THR A CB  1 
ATOM   1879 O  OG1 . THR A 1 240 ? -24.198 -2.240  -1.134  1.00 12.61 ? ? ? ? ? ? 238  THR A OG1 1 
ATOM   1880 C  CG2 . THR A 1 240 ? -21.853 -1.781  -0.852  1.00 12.41 ? ? ? ? ? ? 238  THR A CG2 1 
ATOM   1881 N  N   . PHE A 1 241 ? -21.908 1.675   0.070   1.00 10.11 ? ? ? ? ? ? 239  PHE A N   1 
ATOM   1882 C  CA  . PHE A 1 241 ? -20.702 2.488   -0.087  1.00 9.18  ? ? ? ? ? ? 239  PHE A CA  1 
ATOM   1883 C  C   . PHE A 1 241 ? -19.545 1.615   -0.574  1.00 8.44  ? ? ? ? ? ? 239  PHE A C   1 
ATOM   1884 O  O   . PHE A 1 241 ? -19.225 0.589   0.037   1.00 10.69 ? ? ? ? ? ? 239  PHE A O   1 
ATOM   1885 C  CB  . PHE A 1 241 ? -20.357 3.137   1.255   1.00 9.24  ? ? ? ? ? ? 239  PHE A CB  1 
ATOM   1886 C  CG  . PHE A 1 241 ? -19.148 4.009   1.234   1.00 11.45 ? ? ? ? ? ? 239  PHE A CG  1 
ATOM   1887 C  CD1 . PHE A 1 241 ? -19.164 5.239   0.576   1.00 13.12 ? ? ? ? ? ? 239  PHE A CD1 1 
ATOM   1888 C  CD2 . PHE A 1 241 ? -18.005 3.634   1.920   1.00 9.74  ? ? ? ? ? ? 239  PHE A CD2 1 
ATOM   1889 C  CE1 . PHE A 1 241 ? -18.050 6.058   0.579   1.00 10.23 ? ? ? ? ? ? 239  PHE A CE1 1 
ATOM   1890 C  CE2 . PHE A 1 241 ? -16.878 4.454   1.928   1.00 12.07 ? ? ? ? ? ? 239  PHE A CE2 1 
ATOM   1891 C  CZ  . PHE A 1 241 ? -16.907 5.673   1.250   1.00 12.90 ? ? ? ? ? ? 239  PHE A CZ  1 
ATOM   1892 N  N   . VAL A 1 242 ? -18.909 2.019   -1.672  1.00 10.78 ? ? ? ? ? ? 240  VAL A N   1 
ATOM   1893 C  CA  . VAL A 1 242 ? -17.779 1.275   -2.222  1.00 10.56 ? ? ? ? ? ? 240  VAL A CA  1 
ATOM   1894 C  C   . VAL A 1 242 ? -16.534 1.823   -1.532  1.00 12.97 ? ? ? ? ? ? 240  VAL A C   1 
ATOM   1895 O  O   . VAL A 1 242 ? -15.977 2.842   -1.941  1.00 10.35 ? ? ? ? ? ? 240  VAL A O   1 
ATOM   1896 C  CB  . VAL A 1 242 ? -17.699 1.392   -3.746  1.00 10.21 ? ? ? ? ? ? 240  VAL A CB  1 
ATOM   1897 C  CG1 . VAL A 1 242 ? -16.517 0.582   -4.282  1.00 10.10 ? ? ? ? ? ? 240  VAL A CG1 1 
ATOM   1898 C  CG2 . VAL A 1 242 ? -18.993 0.885   -4.372  1.00 10.19 ? ? ? ? ? ? 240  VAL A CG2 1 
ATOM   1899 N  N   . THR A 1 243 ? -16.106 1.152   -0.471  1.00 9.80  ? ? ? ? ? ? 241  THR A N   1 
ATOM   1900 C  CA  . THR A 1 243 ? -15.028 1.682   0.347   1.00 9.47  ? ? ? ? ? ? 241  THR A CA  1 
ATOM   1901 C  C   . THR A 1 243 ? -13.746 1.763   -0.470  1.00 11.78 ? ? ? ? ? ? 241  THR A C   1 
ATOM   1902 O  O   . THR A 1 243 ? -13.338 0.758   -1.067  1.00 13.00 ? ? ? ? ? ? 241  THR A O   1 
ATOM   1903 C  CB  . THR A 1 243 ? -14.795 0.803   1.576   1.00 14.41 ? ? ? ? ? ? 241  THR A CB  1 
ATOM   1904 O  OG1 . THR A 1 243 ? -16.041 0.587   2.241   1.00 10.27 ? ? ? ? ? ? 241  THR A OG1 1 
ATOM   1905 C  CG2 . THR A 1 243 ? -13.822 1.478   2.535   1.00 12.84 ? ? ? ? ? ? 241  THR A CG2 1 
ATOM   1906 N  N   . PRO A 1 244 ? -13.087 2.921   -0.519  1.00 9.37  ? ? ? ? ? ? 242  PRO A N   1 
ATOM   1907 C  CA  . PRO A 1 244 ? -11.769 3.002   -1.165  1.00 13.39 ? ? ? ? ? ? 242  PRO A CA  1 
ATOM   1908 C  C   . PRO A 1 244 ? -10.805 1.996   -0.554  1.00 14.62 ? ? ? ? ? ? 242  PRO A C   1 
ATOM   1909 O  O   . PRO A 1 244 ? -10.636 1.927   0.667   1.00 13.41 ? ? ? ? ? ? 242  PRO A O   1 
ATOM   1910 C  CB  . PRO A 1 244 ? -11.333 4.452   -0.903  1.00 11.07 ? ? ? ? ? ? 242  PRO A CB  1 
ATOM   1911 C  CG  . PRO A 1 244 ? -12.614 5.200   -0.739  1.00 13.55 ? ? ? ? ? ? 242  PRO A CG  1 
ATOM   1912 C  CD  . PRO A 1 244 ? -13.556 4.234   -0.047  1.00 12.18 ? ? ? ? ? ? 242  PRO A CD  1 
ATOM   1913 N  N   . THR A 1 245 ? -10.196 1.197   -1.417  1.00 12.17 ? ? ? ? ? ? 243  THR A N   1 
ATOM   1914 C  CA  . THR A 1 245 ? -9.388  0.065   -1.004  1.00 16.91 ? ? ? ? ? ? 243  THR A CA  1 
ATOM   1915 C  C   . THR A 1 245 ? -8.135  0.012   -1.867  1.00 17.38 ? ? ? ? ? ? 243  THR A C   1 
ATOM   1916 O  O   . THR A 1 245 ? -8.239  -0.159  -3.087  1.00 15.08 ? ? ? ? ? ? 243  THR A O   1 
ATOM   1917 C  CB  . THR A 1 245 ? -10.201 -1.224  -1.138  1.00 19.29 ? ? ? ? ? ? 243  THR A CB  1 
ATOM   1918 O  OG1 . THR A 1 245 ? -11.370 -1.136  -0.308  1.00 17.50 ? ? ? ? ? ? 243  THR A OG1 1 
ATOM   1919 C  CG2 . THR A 1 245 ? -9.370  -2.451  -0.750  1.00 17.98 ? ? ? ? ? ? 243  THR A CG2 1 
ATOM   1920 N  N   . PRO A 1 246 ? -6.943  0.158   -1.290  1.00 18.75 ? ? ? ? ? ? 244  PRO A N   1 
ATOM   1921 C  CA  . PRO A 1 246 ? -5.728  0.103   -2.112  1.00 19.77 ? ? ? ? ? ? 244  PRO A CA  1 
ATOM   1922 C  C   . PRO A 1 246 ? -5.572  -1.269  -2.755  1.00 15.61 ? ? ? ? ? ? 244  PRO A C   1 
ATOM   1923 O  O   . PRO A 1 246 ? -5.922  -2.296  -2.169  1.00 14.32 ? ? ? ? ? ? 244  PRO A O   1 
ATOM   1924 C  CB  . PRO A 1 246 ? -4.602  0.387   -1.110  1.00 21.17 ? ? ? ? ? ? 244  PRO A CB  1 
ATOM   1925 C  CG  . PRO A 1 246 ? -5.290  1.049   0.063   1.00 29.44 ? ? ? ? ? ? 244  PRO A CG  1 
ATOM   1926 C  CD  . PRO A 1 246 ? -6.643  0.423   0.126   1.00 21.98 ? ? ? ? ? ? 244  PRO A CD  1 
ATOM   1927 N  N   . GLY A 1 247 ? -5.058  -1.277  -3.980  1.00 15.53 ? ? ? ? ? ? 245  GLY A N   1 
ATOM   1928 C  CA  . GLY A 1 247 ? -4.764  -2.534  -4.637  1.00 14.30 ? ? ? ? ? ? 245  GLY A CA  1 
ATOM   1929 C  C   . GLY A 1 247 ? -5.947  -3.289  -5.201  1.00 9.33  ? ? ? ? ? ? 245  GLY A C   1 
ATOM   1930 O  O   . GLY A 1 247 ? -5.865  -4.509  -5.351  1.00 15.59 ? ? ? ? ? ? 245  GLY A O   1 
ATOM   1931 N  N   . VAL A 1 248 ? -7.052  -2.614  -5.523  1.00 9.97  ? ? ? ? ? ? 246  VAL A N   1 
ATOM   1932 C  CA  . VAL A 1 248 ? -8.166  -3.268  -6.197  1.00 12.62 ? ? ? ? ? ? 246  VAL A CA  1 
ATOM   1933 C  C   . VAL A 1 248 ? -8.762  -2.338  -7.242  1.00 12.38 ? ? ? ? ? ? 246  VAL A C   1 
ATOM   1934 O  O   . VAL A 1 248 ? -8.638  -1.112  -7.175  1.00 12.75 ? ? ? ? ? ? 246  VAL A O   1 
ATOM   1935 C  CB  . VAL A 1 248 ? -9.299  -3.722  -5.243  1.00 13.92 ? ? ? ? ? ? 246  VAL A CB  1 
ATOM   1936 C  CG1 . VAL A 1 248 ? -8.780  -4.674  -4.145  1.00 13.77 ? ? ? ? ? ? 246  VAL A CG1 1 
ATOM   1937 C  CG2 . VAL A 1 248 ? -10.027 -2.515  -4.661  1.00 11.83 ? ? ? ? ? ? 246  VAL A CG2 1 
ATOM   1938 N  N   . TRP A 1 249 ? -9.399  -2.961  -8.224  1.00 10.64 ? ? ? ? ? ? 247  TRP A N   1 
ATOM   1939 C  CA  . TRP A 1 249 ? -10.432 -2.367  -9.053  1.00 9.92  ? ? ? ? ? ? 247  TRP A CA  1 
ATOM   1940 C  C   . TRP A 1 249 ? -11.764 -3.010  -8.684  1.00 10.72 ? ? ? ? ? ? 247  TRP A C   1 
ATOM   1941 O  O   . TRP A 1 249 ? -11.804 -4.127  -8.160  1.00 10.00 ? ? ? ? ? ? 247  TRP A O   1 
ATOM   1942 C  CB  . TRP A 1 249 ? -10.155 -2.610  -10.539 1.00 10.02 ? ? ? ? ? ? 247  TRP A CB  1 
ATOM   1943 C  CG  . TRP A 1 249 ? -8.912  -1.982  -11.076 1.00 8.66  ? ? ? ? ? ? 247  TRP A CG  1 
ATOM   1944 C  CD1 . TRP A 1 249 ? -8.316  -0.832  -10.646 1.00 10.72 ? ? ? ? ? ? 247  TRP A CD1 1 
ATOM   1945 C  CD2 . TRP A 1 249 ? -8.120  -2.463  -12.166 1.00 8.48  ? ? ? ? ? ? 247  TRP A CD2 1 
ATOM   1946 N  NE1 . TRP A 1 249 ? -7.203  -0.564  -11.405 1.00 10.14 ? ? ? ? ? ? 247  TRP A NE1 1 
ATOM   1947 C  CE2 . TRP A 1 249 ? -7.059  -1.547  -12.347 1.00 10.71 ? ? ? ? ? ? 247  TRP A CE2 1 
ATOM   1948 C  CE3 . TRP A 1 249 ? -8.204  -3.576  -13.008 1.00 10.54 ? ? ? ? ? ? 247  TRP A CE3 1 
ATOM   1949 C  CZ2 . TRP A 1 249 ? -6.087  -1.711  -13.332 1.00 9.55  ? ? ? ? ? ? 247  TRP A CZ2 1 
ATOM   1950 C  CZ3 . TRP A 1 249 ? -7.237  -3.738  -13.997 1.00 9.11  ? ? ? ? ? ? 247  TRP A CZ3 1 
ATOM   1951 C  CH2 . TRP A 1 249 ? -6.190  -2.810  -14.144 1.00 10.34 ? ? ? ? ? ? 247  TRP A CH2 1 
ATOM   1952 N  N   . THR A 1 250 ? -12.859 -2.317  -8.983  1.00 8.85  ? ? ? ? ? ? 248  THR A N   1 
ATOM   1953 C  CA  . THR A 1 250 ? -14.179 -2.912  -8.852  1.00 8.42  ? ? ? ? ? ? 248  THR A CA  1 
ATOM   1954 C  C   . THR A 1 250 ? -14.744 -3.214  -10.234 1.00 8.93  ? ? ? ? ? ? 248  THR A C   1 
ATOM   1955 O  O   . THR A 1 250 ? -14.306 -2.657  -11.241 1.00 8.21  ? ? ? ? ? ? 248  THR A O   1 
ATOM   1956 C  CB  . THR A 1 250 ? -15.140 -2.008  -8.062  1.00 9.26  ? ? ? ? ? ? 248  THR A CB  1 
ATOM   1957 O  OG1 . THR A 1 250 ? -15.266 -0.746  -8.714  1.00 12.66 ? ? ? ? ? ? 248  THR A OG1 1 
ATOM   1958 C  CG2 . THR A 1 250 ? -14.644 -1.802  -6.631  1.00 9.20  ? ? ? ? ? ? 248  THR A CG2 1 
ATOM   1959 N  N   . VAL A 1 251 ? -15.710 -4.133  -10.274 1.00 9.41  ? ? ? ? ? ? 249  VAL A N   1 
ATOM   1960 C  CA  . VAL A 1 251 ? -16.272 -4.636  -11.526 1.00 10.03 ? ? ? ? ? ? 249  VAL A CA  1 
ATOM   1961 C  C   . VAL A 1 251 ? -17.768 -4.829  -11.346 1.00 11.10 ? ? ? ? ? ? 249  VAL A C   1 
ATOM   1962 O  O   . VAL A 1 251 ? -18.194 -5.494  -10.392 1.00 7.74  ? ? ? ? ? ? 249  VAL A O   1 
ATOM   1963 C  CB  . VAL A 1 251 ? -15.654 -5.985  -11.956 1.00 10.16 ? ? ? ? ? ? 249  VAL A CB  1 
ATOM   1964 C  CG1 . VAL A 1 251 ? -16.081 -6.326  -13.391 1.00 10.02 ? ? ? ? ? ? 249  VAL A CG1 1 
ATOM   1965 C  CG2 . VAL A 1 251 ? -14.125 -5.999  -11.798 1.00 7.47  ? ? ? ? ? ? 249  VAL A CG2 1 
ATOM   1966 N  N   . PHE A 1 252 ? -18.565 -4.316  -12.280 1.00 8.16  ? ? ? ? ? ? 250  PHE A N   1 
ATOM   1967 C  CA  . PHE A 1 252 ? -19.991 -4.605  -12.224 1.00 11.78 ? ? ? ? ? ? 250  PHE A CA  1 
ATOM   1968 C  C   . PHE A 1 252 ? -20.560 -4.656  -13.637 1.00 8.98  ? ? ? ? ? ? 250  PHE A C   1 
ATOM   1969 O  O   . PHE A 1 252 ? -19.946 -4.140  -14.584 1.00 8.21  ? ? ? ? ? ? 250  PHE A O   1 
ATOM   1970 C  CB  . PHE A 1 252 ? -20.750 -3.605  -11.322 1.00 7.20  ? ? ? ? ? ? 250  PHE A CB  1 
ATOM   1971 C  CG  . PHE A 1 252 ? -20.621 -2.144  -11.710 1.00 12.72 ? ? ? ? ? ? 250  PHE A CG  1 
ATOM   1972 C  CD1 . PHE A 1 252 ? -19.734 -1.307  -11.043 1.00 14.05 ? ? ? ? ? ? 250  PHE A CD1 1 
ATOM   1973 C  CD2 . PHE A 1 252 ? -21.446 -1.594  -12.668 1.00 11.71 ? ? ? ? ? ? 250  PHE A CD2 1 
ATOM   1974 C  CE1 . PHE A 1 252 ? -19.639 0.043   -11.368 1.00 17.22 ? ? ? ? ? ? 250  PHE A CE1 1 
ATOM   1975 C  CE2 . PHE A 1 252 ? -21.353 -0.248  -13.003 1.00 13.58 ? ? ? ? ? ? 250  PHE A CE2 1 
ATOM   1976 C  CZ  . PHE A 1 252 ? -20.451 0.573   -12.343 1.00 12.81 ? ? ? ? ? ? 250  PHE A CZ  1 
ATOM   1977 N  N   . PRO A 1 253 ? -21.708 -5.315  -13.820 1.00 10.62 ? ? ? ? ? ? 251  PRO A N   1 
ATOM   1978 C  CA  . PRO A 1 253 ? -22.300 -5.454  -15.156 1.00 10.27 ? ? ? ? ? ? 251  PRO A CA  1 
ATOM   1979 C  C   . PRO A 1 253 ? -23.048 -4.209  -15.600 1.00 11.04 ? ? ? ? ? ? 251  PRO A C   1 
ATOM   1980 O  O   . PRO A 1 253 ? -23.661 -3.499  -14.799 1.00 10.81 ? ? ? ? ? ? 251  PRO A O   1 
ATOM   1981 C  CB  . PRO A 1 253 ? -23.283 -6.622  -14.993 1.00 11.52 ? ? ? ? ? ? 251  PRO A CB  1 
ATOM   1982 C  CG  . PRO A 1 253 ? -23.140 -7.110  -13.570 1.00 12.43 ? ? ? ? ? ? 251  PRO A CG  1 
ATOM   1983 C  CD  . PRO A 1 253 ? -22.472 -6.051  -12.794 1.00 9.97  ? ? ? ? ? ? 251  PRO A CD  1 
ATOM   1984 N  N   . GLY A 1 254 ? -23.004 -3.962  -16.911 1.00 10.36 ? ? ? ? ? ? 252  GLY A N   1 
ATOM   1985 C  CA  . GLY A 1 254 ? -23.790 -2.913  -17.522 1.00 9.73  ? ? ? ? ? ? 252  GLY A CA  1 
ATOM   1986 C  C   . GLY A 1 254 ? -25.056 -3.452  -18.184 1.00 8.08  ? ? ? ? ? ? 252  GLY A C   1 
ATOM   1987 O  O   . GLY A 1 254 ? -25.364 -4.642  -18.152 1.00 11.07 ? ? ? ? ? ? 252  GLY A O   1 
ATOM   1988 N  N   . ASP A 1 255 ? -25.784 -2.527  -18.817 1.00 10.34 ? ? ? ? ? ? 253  ASP A N   1 
ATOM   1989 C  CA  . ASP A 1 255 ? -27.072 -2.849  -19.429 1.00 11.03 ? ? ? ? ? ? 253  ASP A CA  1 
ATOM   1990 C  C   . ASP A 1 255 ? -26.964 -3.990  -20.441 1.00 10.45 ? ? ? ? ? ? 253  ASP A C   1 
ATOM   1991 O  O   . ASP A 1 255 ? -27.883 -4.807  -20.569 1.00 12.18 ? ? ? ? ? ? 253  ASP A O   1 
ATOM   1992 C  CB  . ASP A 1 255 ? -27.631 -1.617  -20.143 1.00 10.43 ? ? ? ? ? ? 253  ASP A CB  1 
ATOM   1993 C  CG  . ASP A 1 255 ? -28.081 -0.523  -19.197 1.00 13.64 ? ? ? ? ? ? 253  ASP A CG  1 
ATOM   1994 O  OD1 . ASP A 1 255 ? -28.288 0.586   -19.722 1.00 12.04 ? ? ? ? ? ? 253  ASP A OD1 1 
ATOM   1995 O  OD2 . ASP A 1 255 ? -28.219 -0.747  -17.959 1.00 13.37 ? ? ? ? ? ? 253  ASP A OD2 1 
ATOM   1996 N  N   . ILE A 1 256 ? -25.881 -4.024  -21.215 1.00 9.89  ? ? ? ? ? ? 254  ILE A N   1 
ATOM   1997 C  CA  . ILE A 1 256 ? -25.772 -5.042  -22.255 1.00 11.42 ? ? ? ? ? ? 254  ILE A CA  1 
ATOM   1998 C  C   . ILE A 1 256 ? -25.625 -6.424  -21.636 1.00 13.64 ? ? ? ? ? ? 254  ILE A C   1 
ATOM   1999 O  O   . ILE A 1 256 ? -26.164 -7.405  -22.158 1.00 13.62 ? ? ? ? ? ? 254  ILE A O   1 
ATOM   2000 C  CB  . ILE A 1 256 ? -24.618 -4.716  -23.215 1.00 10.08 ? ? ? ? ? ? 254  ILE A CB  1 
ATOM   2001 C  CG1 . ILE A 1 256 ? -24.874 -3.339  -23.831 1.00 13.59 ? ? ? ? ? ? 254  ILE A CG1 1 
ATOM   2002 C  CG2 . ILE A 1 256 ? -24.513 -5.796  -24.307 1.00 9.65  ? ? ? ? ? ? 254  ILE A CG2 1 
ATOM   2003 C  CD1 . ILE A 1 256 ? -24.006 -3.026  -25.019 1.00 16.89 ? ? ? ? ? ? 254  ILE A CD1 1 
ATOM   2004 N  N   . LEU A 1 257 ? -24.923 -6.525  -20.505 1.00 11.68 ? ? ? ? ? ? 255  LEU A N   1 
ATOM   2005 C  CA  . LEU A 1 257 ? -24.842 -7.818  -19.825 1.00 12.17 ? ? ? ? ? ? 255  LEU A CA  1 
ATOM   2006 C  C   . LEU A 1 257 ? -26.200 -8.224  -19.262 1.00 11.91 ? ? ? ? ? ? 255  LEU A C   1 
ATOM   2007 O  O   . LEU A 1 257 ? -26.565 -9.406  -19.306 1.00 14.35 ? ? ? ? ? ? 255  LEU A O   1 
ATOM   2008 C  CB  . LEU A 1 257 ? -23.780 -7.786  -18.724 1.00 11.62 ? ? ? ? ? ? 255  LEU A CB  1 
ATOM   2009 C  CG  . LEU A 1 257 ? -22.452 -8.446  -19.090 1.00 15.98 ? ? ? ? ? ? 255  LEU A CG  1 
ATOM   2010 C  CD1 . LEU A 1 257 ? -21.499 -8.462  -17.911 1.00 13.45 ? ? ? ? ? ? 255  LEU A CD1 1 
ATOM   2011 C  CD2 . LEU A 1 257 ? -22.668 -9.867  -19.619 1.00 15.50 ? ? ? ? ? ? 255  LEU A CD2 1 
ATOM   2012 N  N   . GLN A 1 258 ? -26.966 -7.261  -18.741 1.00 8.53  ? ? ? ? ? ? 256  GLN A N   1 
ATOM   2013 C  CA  . GLN A 1 258 ? -28.334 -7.553  -18.324 1.00 11.39 ? ? ? ? ? ? 256  GLN A CA  1 
ATOM   2014 C  C   . GLN A 1 258 ? -29.153 -8.066  -19.497 1.00 13.10 ? ? ? ? ? ? 256  GLN A C   1 
ATOM   2015 O  O   . GLN A 1 258 ? -29.884 -9.055  -19.377 1.00 12.11 ? ? ? ? ? ? 256  GLN A O   1 
ATOM   2016 C  CB  . GLN A 1 258 ? -28.994 -6.305  -17.739 1.00 10.12 ? ? ? ? ? ? 256  GLN A CB  1 
ATOM   2017 C  CG  . GLN A 1 258 ? -30.333 -6.591  -17.050 1.00 13.66 ? ? ? ? ? ? 256  GLN A CG  1 
ATOM   2018 C  CD  . GLN A 1 258 ? -31.021 -5.337  -16.547 1.00 12.69 ? ? ? ? ? ? 256  GLN A CD  1 
ATOM   2019 O  OE1 . GLN A 1 258 ? -30.363 -4.385  -16.128 1.00 11.51 ? ? ? ? ? ? 256  GLN A OE1 1 
ATOM   2020 N  NE2 . GLN A 1 258 ? -32.356 -5.325  -16.592 1.00 11.23 ? ? ? ? ? ? 256  GLN A NE2 1 
ATOM   2021 N  N   . PHE A 1 259 ? -29.059 -7.381  -20.636 1.00 9.94  ? ? ? ? ? ? 257  PHE A N   1 
ATOM   2022 C  CA  . PHE A 1 259 ? -29.787 -7.799  -21.826 1.00 11.43 ? ? ? ? ? ? 257  PHE A CA  1 
ATOM   2023 C  C   . PHE A 1 259 ? -29.394 -9.206  -22.244 1.00 11.56 ? ? ? ? ? ? 257  PHE A C   1 
ATOM   2024 O  O   . PHE A 1 259 ? -30.262 -10.059 -22.463 1.00 11.69 ? ? ? ? ? ? 257  PHE A O   1 
ATOM   2025 C  CB  . PHE A 1 259 ? -29.531 -6.818  -22.974 1.00 10.44 ? ? ? ? ? ? 257  PHE A CB  1 
ATOM   2026 C  CG  . PHE A 1 259 ? -30.026 -7.311  -24.298 1.00 12.84 ? ? ? ? ? ? 257  PHE A CG  1 
ATOM   2027 C  CD1 . PHE A 1 259 ? -31.384 -7.416  -24.551 1.00 10.99 ? ? ? ? ? ? 257  PHE A CD1 1 
ATOM   2028 C  CD2 . PHE A 1 259 ? -29.134 -7.696  -25.280 1.00 11.07 ? ? ? ? ? ? 257  PHE A CD2 1 
ATOM   2029 C  CE1 . PHE A 1 259 ? -31.844 -7.876  -25.779 1.00 13.65 ? ? ? ? ? ? 257  PHE A CE1 1 
ATOM   2030 C  CE2 . PHE A 1 259 ? -29.589 -8.153  -26.506 1.00 14.84 ? ? ? ? ? ? 257  PHE A CE2 1 
ATOM   2031 C  CZ  . PHE A 1 259 ? -30.948 -8.246  -26.749 1.00 16.03 ? ? ? ? ? ? 257  PHE A CZ  1 
ATOM   2032 N  N   . MET A 1 260 ? -28.085 -9.470  -22.380 1.00 9.60  ? ? ? ? ? ? 258  MET A N   1 
ATOM   2033 C  CA  . MET A 1 260 ? -27.676 -10.767 -22.922 1.00 10.57 ? ? ? ? ? ? 258  MET A CA  1 
ATOM   2034 C  C   . MET A 1 260 ? -27.992 -11.913 -21.972 1.00 15.25 ? ? ? ? ? ? 258  MET A C   1 
ATOM   2035 O  O   . MET A 1 260 ? -28.281 -13.022 -22.434 1.00 13.56 ? ? ? ? ? ? 258  MET A O   1 
ATOM   2036 C  CB  . MET A 1 260 ? -26.188 -10.794 -23.274 1.00 11.75 ? ? ? ? ? ? 258  MET A CB  1 
ATOM   2037 C  CG  . MET A 1 260 ? -25.796 -9.778  -24.336 1.00 11.15 ? ? ? ? ? ? 258  MET A CG  1 
ATOM   2038 S  SD  . MET A 1 260 ? -24.103 -9.991  -24.898 1.00 13.49 ? ? ? ? ? ? 258  MET A SD  1 
ATOM   2039 C  CE  . MET A 1 260 ? -24.142 -11.653 -25.583 1.00 16.49 ? ? ? ? ? ? 258  MET A CE  1 
ATOM   2040 N  N   . THR A 1 261 ? -27.927 -11.682 -20.659 1.00 12.10 ? ? ? ? ? ? 259  THR A N   1 
ATOM   2041 C  CA  . THR A 1 261 ? -28.238 -12.726 -19.692 1.00 11.93 ? ? ? ? ? ? 259  THR A CA  1 
ATOM   2042 C  C   . THR A 1 261 ? -29.716 -12.769 -19.345 1.00 12.17 ? ? ? ? ? ? 259  THR A C   1 
ATOM   2043 O  O   . THR A 1 261 ? -30.107 -13.556 -18.471 1.00 14.10 ? ? ? ? ? ? 259  THR A O   1 
ATOM   2044 C  CB  . THR A 1 261 ? -27.409 -12.558 -18.397 1.00 14.20 ? ? ? ? ? ? 259  THR A CB  1 
ATOM   2045 O  OG1 . THR A 1 261 ? -27.745 -11.326 -17.731 1.00 10.59 ? ? ? ? ? ? 259  THR A OG1 1 
ATOM   2046 C  CG2 . THR A 1 261 ? -25.911 -12.586 -18.699 1.00 8.58  ? ? ? ? ? ? 259  THR A CG2 1 
ATOM   2047 N  N   . GLY A 1 262 ? -30.541 -11.952 -20.000 1.00 12.31 ? ? ? ? ? ? 260  GLY A N   1 
ATOM   2048 C  CA  . GLY A 1 262 ? -31.966 -11.968 -19.723 1.00 16.00 ? ? ? ? ? ? 260  GLY A CA  1 
ATOM   2049 C  C   . GLY A 1 262 ? -32.300 -11.629 -18.290 1.00 18.32 ? ? ? ? ? ? 260  GLY A C   1 
ATOM   2050 O  O   . GLY A 1 262 ? -33.257 -12.177 -17.731 1.00 18.93 ? ? ? ? ? ? 260  GLY A O   1 
ATOM   2051 N  N   . GLY A 1 263 ? -31.524 -10.746 -17.671 1.00 16.97 ? ? ? ? ? ? 261  GLY A N   1 
ATOM   2052 C  CA  . GLY A 1 263 ? -31.771 -10.376 -16.297 1.00 14.83 ? ? ? ? ? ? 261  GLY A CA  1 
ATOM   2053 C  C   . GLY A 1 263 ? -31.208 -11.309 -15.242 1.00 14.80 ? ? ? ? ? ? 261  GLY A C   1 
ATOM   2054 O  O   . GLY A 1 263 ? -31.435 -11.061 -14.051 1.00 15.83 ? ? ? ? ? ? 261  GLY A O   1 
ATOM   2055 N  N   . GLN A 1 264 ? -30.490 -12.375 -15.627 1.00 17.35 ? ? ? ? ? ? 262  GLN A N   1 
ATOM   2056 C  CA  . GLN A 1 264 ? -29.784 -13.180 -14.629 1.00 13.39 ? ? ? ? ? ? 262  GLN A CA  1 
ATOM   2057 C  C   . GLN A 1 264 ? -28.706 -12.349 -13.938 1.00 12.94 ? ? ? ? ? ? 262  GLN A C   1 
ATOM   2058 O  O   . GLN A 1 264 ? -28.472 -12.486 -12.729 1.00 11.11 ? ? ? ? ? ? 262  GLN A O   1 
ATOM   2059 C  CB  . GLN A 1 264 ? -29.174 -14.430 -15.272 1.00 14.92 ? ? ? ? ? ? 262  GLN A CB  1 
ATOM   2060 C  CG  . GLN A 1 264 ? -30.192 -15.486 -15.725 1.00 17.75 ? ? ? ? ? ? 262  GLN A CG  1 
ATOM   2061 C  CD  . GLN A 1 264 ? -31.033 -16.034 -14.578 1.00 25.18 ? ? ? ? ? ? 262  GLN A CD  1 
ATOM   2062 O  OE1 . GLN A 1 264 ? -30.507 -16.413 -13.530 1.00 26.10 ? ? ? ? ? ? 262  GLN A OE1 1 
ATOM   2063 N  NE2 . GLN A 1 264 ? -32.350 -16.070 -14.775 1.00 24.23 ? ? ? ? ? ? 262  GLN A NE2 1 
ATOM   2064 N  N   . LEU A 1 265 ? -28.036 -11.490 -14.696 1.00 11.60 ? ? ? ? ? ? 263  LEU A N   1 
ATOM   2065 C  CA  . LEU A 1 265 ? -27.280 -10.371 -14.152 1.00 11.31 ? ? ? ? ? ? 263  LEU A CA  1 
ATOM   2066 C  C   . LEU A 1 265 ? -28.079 -9.086  -14.354 1.00 12.89 ? ? ? ? ? ? 263  LEU A C   1 
ATOM   2067 O  O   . LEU A 1 265 ? -28.775 -8.925  -15.361 1.00 10.87 ? ? ? ? ? ? 263  LEU A O   1 
ATOM   2068 C  CB  . LEU A 1 265 ? -25.912 -10.247 -14.826 1.00 11.21 ? ? ? ? ? ? 263  LEU A CB  1 
ATOM   2069 C  CG  . LEU A 1 265 ? -24.965 -11.452 -14.799 1.00 8.37  ? ? ? ? ? ? 263  LEU A CG  1 
ATOM   2070 C  CD1 . LEU A 1 265 ? -23.679 -11.142 -15.561 1.00 9.63  ? ? ? ? ? ? 263  LEU A CD1 1 
ATOM   2071 C  CD2 . LEU A 1 265 ? -24.636 -11.837 -13.360 1.00 12.50 ? ? ? ? ? ? 263  LEU A CD2 1 
ATOM   2072 N  N   . LEU A 1 266 ? -27.993 -8.180  -13.390 1.00 10.56 ? ? ? ? ? ? 264  LEU A N   1 
ATOM   2073 C  CA  . LEU A 1 266 ? -28.649 -6.883  -13.491 1.00 10.63 ? ? ? ? ? ? 264  LEU A CA  1 
ATOM   2074 C  C   . LEU A 1 266 ? -27.606 -5.786  -13.633 1.00 10.59 ? ? ? ? ? ? 264  LEU A C   1 
ATOM   2075 O  O   . LEU A 1 266 ? -26.564 -5.816  -12.973 1.00 9.15  ? ? ? ? ? ? 264  LEU A O   1 
ATOM   2076 C  CB  . LEU A 1 266 ? -29.524 -6.613  -12.268 1.00 10.26 ? ? ? ? ? ? 264  LEU A CB  1 
ATOM   2077 C  CG  . LEU A 1 266 ? -30.720 -7.565  -12.164 1.00 12.51 ? ? ? ? ? ? 264  LEU A CG  1 
ATOM   2078 C  CD1 . LEU A 1 266 ? -31.295 -7.553  -10.747 1.00 12.36 ? ? ? ? ? ? 264  LEU A CD1 1 
ATOM   2079 C  CD2 . LEU A 1 266 ? -31.780 -7.203  -13.197 1.00 11.68 ? ? ? ? ? ? 264  LEU A CD2 1 
ATOM   2080 N  N   . SER A 1 267 ? -27.875 -4.831  -14.517 1.00 9.36  ? ? ? ? ? ? 265  SER A N   1 
ATOM   2081 C  CA  . SER A 1 267 ? -27.029 -3.647  -14.589 1.00 9.28  ? ? ? ? ? ? 265  SER A CA  1 
ATOM   2082 C  C   . SER A 1 267 ? -27.045 -2.926  -13.244 1.00 9.09  ? ? ? ? ? ? 265  SER A C   1 
ATOM   2083 O  O   . SER A 1 267 ? -28.113 -2.564  -12.736 1.00 9.29  ? ? ? ? ? ? 265  SER A O   1 
ATOM   2084 C  CB  . SER A 1 267 ? -27.520 -2.729  -15.702 1.00 9.41  ? ? ? ? ? ? 265  SER A CB  1 
ATOM   2085 O  OG  . SER A 1 267 ? -26.577 -1.701  -15.948 1.00 10.15 ? ? ? ? ? ? 265  SER A OG  1 
ATOM   2086 N  N   . THR A 1 268 ? -25.870 -2.727  -12.654 1.00 6.70  ? ? ? ? ? ? 266  THR A N   1 
ATOM   2087 C  CA  . THR A 1 268 ? -25.810 -2.258  -11.271 1.00 7.17  ? ? ? ? ? ? 266  THR A CA  1 
ATOM   2088 C  C   . THR A 1 268 ? -26.084 -0.757  -11.195 1.00 10.60 ? ? ? ? ? ? 266  THR A C   1 
ATOM   2089 O  O   . THR A 1 268 ? -25.328 0.034   -11.776 1.00 10.19 ? ? ? ? ? ? 266  THR A O   1 
ATOM   2090 C  CB  . THR A 1 268 ? -24.448 -2.585  -10.666 1.00 9.67  ? ? ? ? ? ? 266  THR A CB  1 
ATOM   2091 O  OG1 . THR A 1 268 ? -24.262 -4.011  -10.656 1.00 9.56  ? ? ? ? ? ? 266  THR A OG1 1 
ATOM   2092 C  CG2 . THR A 1 268 ? -24.370 -2.077  -9.236  1.00 6.70  ? ? ? ? ? ? 266  THR A CG2 1 
ATOM   2093 N  N   . PRO A 1 269 ? -27.136 -0.321  -10.504 1.00 11.43 ? ? ? ? ? ? 267  PRO A N   1 
ATOM   2094 C  CA  . PRO A 1 269 ? -27.320 1.124   -10.307 1.00 12.21 ? ? ? ? ? ? 267  PRO A CA  1 
ATOM   2095 C  C   . PRO A 1 269 ? -26.233 1.687   -9.407  1.00 11.69 ? ? ? ? ? ? 267  PRO A C   1 
ATOM   2096 O  O   . PRO A 1 269 ? -25.793 1.045   -8.452  1.00 8.24  ? ? ? ? ? ? 267  PRO A O   1 
ATOM   2097 C  CB  . PRO A 1 269 ? -28.708 1.229   -9.654  1.00 7.86  ? ? ? ? ? ? 267  PRO A CB  1 
ATOM   2098 C  CG  . PRO A 1 269 ? -29.371 -0.142  -9.910  1.00 9.66  ? ? ? ? ? ? 267  PRO A CG  1 
ATOM   2099 C  CD  . PRO A 1 269 ? -28.212 -1.106  -9.878  1.00 7.91  ? ? ? ? ? ? 267  PRO A CD  1 
ATOM   2100 N  N   . HIS A 1 270 ? -25.807 2.906   -9.715  1.00 10.03 ? ? ? ? ? ? 268  HIS A N   1 
ATOM   2101 C  CA  . HIS A 1 270 ? -24.786 3.552   -8.912  1.00 10.30 ? ? ? ? ? ? 268  HIS A CA  1 
ATOM   2102 C  C   . HIS A 1 270 ? -25.003 5.057   -8.945  1.00 10.10 ? ? ? ? ? ? 268  HIS A C   1 
ATOM   2103 O  O   . HIS A 1 270 ? -25.677 5.588   -9.829  1.00 9.53  ? ? ? ? ? ? 268  HIS A O   1 
ATOM   2104 C  CB  . HIS A 1 270 ? -23.376 3.176   -9.391  1.00 9.92  ? ? ? ? ? ? 268  HIS A CB  1 
ATOM   2105 C  CG  . HIS A 1 270 ? -23.159 3.377   -10.857 1.00 10.10 ? ? ? ? ? ? 268  HIS A CG  1 
ATOM   2106 N  ND1 . HIS A 1 270 ? -23.693 2.540   -11.815 1.00 10.52 ? ? ? ? ? ? 268  HIS A ND1 1 
ATOM   2107 C  CD2 . HIS A 1 270 ? -22.456 4.319   -11.530 1.00 13.27 ? ? ? ? ? ? 268  HIS A CD2 1 
ATOM   2108 C  CE1 . HIS A 1 270 ? -23.329 2.962   -13.016 1.00 11.48 ? ? ? ? ? ? 268  HIS A CE1 1 
ATOM   2109 N  NE2 . HIS A 1 270 ? -22.581 4.041   -12.869 1.00 10.24 ? ? ? ? ? ? 268  HIS A NE2 1 
ATOM   2110 N  N   . LYS A 1 271 ? -24.441 5.730   -7.941  1.00 9.11  ? ? ? ? ? ? 269  LYS A N   1 
ATOM   2111 C  CA  . LYS A 1 271 ? -24.553 7.173   -7.773  1.00 8.43  ? ? ? ? ? ? 269  LYS A CA  1 
ATOM   2112 C  C   . LYS A 1 271 ? -23.329 7.621   -6.997  1.00 10.52 ? ? ? ? ? ? 269  LYS A C   1 
ATOM   2113 O  O   . LYS A 1 271 ? -22.617 6.805   -6.415  1.00 10.91 ? ? ? ? ? ? 269  LYS A O   1 
ATOM   2114 C  CB  . LYS A 1 271 ? -25.835 7.564   -7.028  1.00 10.20 ? ? ? ? ? ? 269  LYS A CB  1 
ATOM   2115 C  CG  . LYS A 1 271 ? -25.891 6.999   -5.606  1.00 11.50 ? ? ? ? ? ? 269  LYS A CG  1 
ATOM   2116 C  CD  . LYS A 1 271 ? -27.239 7.286   -4.939  1.00 11.85 ? ? ? ? ? ? 269  LYS A CD  1 
ATOM   2117 C  CE  . LYS A 1 271 ? -27.234 6.837   -3.472  1.00 15.47 ? ? ? ? ? ? 269  LYS A CE  1 
ATOM   2118 N  NZ  . LYS A 1 271 ? -28.454 7.332   -2.764  1.00 17.38 ? ? ? ? ? ? 269  LYS A NZ  1 
ATOM   2119 N  N   . VAL A 1 272 ? -23.082 8.925   -6.977  1.00 9.35  ? ? ? ? ? ? 270  VAL A N   1 
ATOM   2120 C  CA  . VAL A 1 272 ? -21.907 9.459   -6.298  1.00 8.79  ? ? ? ? ? ? 270  VAL A CA  1 
ATOM   2121 C  C   . VAL A 1 272 ? -22.346 10.589  -5.381  1.00 8.95  ? ? ? ? ? ? 270  VAL A C   1 
ATOM   2122 O  O   . VAL A 1 272 ? -23.074 11.489  -5.811  1.00 10.29 ? ? ? ? ? ? 270  VAL A O   1 
ATOM   2123 C  CB  . VAL A 1 272 ? -20.849 9.963   -7.296  1.00 11.93 ? ? ? ? ? ? 270  VAL A CB  1 
ATOM   2124 C  CG1 . VAL A 1 272 ? -19.727 10.688  -6.550  1.00 8.98  ? ? ? ? ? ? 270  VAL A CG1 1 
ATOM   2125 C  CG2 . VAL A 1 272 ? -20.298 8.792   -8.137  1.00 12.71 ? ? ? ? ? ? 270  VAL A CG2 1 
ATOM   2126 N  N   . LYS A 1 273 ? -21.916 10.529  -4.125  1.00 10.05 ? ? ? ? ? ? 271  LYS A N   1 
ATOM   2127 C  CA  . LYS A 1 273 ? -22.101 11.614  -3.162  1.00 13.70 ? ? ? ? ? ? 271  LYS A CA  1 
ATOM   2128 C  C   . LYS A 1 273 ? -20.877 12.526  -3.164  1.00 11.46 ? ? ? ? ? ? 271  LYS A C   1 
ATOM   2129 O  O   . LYS A 1 273 ? -19.744 12.037  -3.127  1.00 11.47 ? ? ? ? ? ? 271  LYS A O   1 
ATOM   2130 C  CB  . LYS A 1 273 ? -22.326 11.012  -1.772  1.00 11.90 ? ? ? ? ? ? 271  LYS A CB  1 
ATOM   2131 C  CG  . LYS A 1 273 ? -22.320 11.990  -0.599  1.00 19.43 ? ? ? ? ? ? 271  LYS A CG  1 
ATOM   2132 C  CD  . LYS A 1 273 ? -23.308 11.580  0.489   1.00 35.07 ? ? ? ? ? ? 271  LYS A CD  1 
ATOM   2133 C  CE  . LYS A 1 273 ? -22.772 11.877  1.902   1.00 46.53 ? ? ? ? ? ? 271  LYS A CE  1 
ATOM   2134 N  NZ  . LYS A 1 273 ? -21.637 10.985  2.326   1.00 54.00 ? ? ? ? ? ? 271  LYS A NZ  1 
ATOM   2135 N  N   . LEU A 1 274 ? -21.096 13.847  -3.206  1.00 9.23  ? ? ? ? ? ? 272  LEU A N   1 
ATOM   2136 C  CA  . LEU A 1 274 ? -19.987 14.782  -3.040  1.00 9.62  ? ? ? ? ? ? 272  LEU A CA  1 
ATOM   2137 C  C   . LEU A 1 274 ? -19.411 14.696  -1.629  1.00 12.98 ? ? ? ? ? ? 272  LEU A C   1 
ATOM   2138 O  O   . LEU A 1 274 ? -20.130 14.496  -0.643  1.00 16.86 ? ? ? ? ? ? 272  LEU A O   1 
ATOM   2139 C  CB  . LEU A 1 274 ? -20.428 16.225  -3.325  1.00 9.81  ? ? ? ? ? ? 272  LEU A CB  1 
ATOM   2140 C  CG  . LEU A 1 274 ? -21.024 16.519  -4.703  1.00 9.60  ? ? ? ? ? ? 272  LEU A CG  1 
ATOM   2141 C  CD1 . LEU A 1 274 ? -21.411 18.003  -4.785  1.00 12.25 ? ? ? ? ? ? 272  LEU A CD1 1 
ATOM   2142 C  CD2 . LEU A 1 274 ? -20.054 16.156  -5.818  1.00 7.96  ? ? ? ? ? ? 272  LEU A CD2 1 
ATOM   2143 N  N   . ASN A 1 275 ? -18.101 14.856  -1.538  1.00 11.68 ? ? ? ? ? ? 273  ASN A N   1 
ATOM   2144 C  CA  . ASN A 1 275 ? -17.375 14.787  -0.275  1.00 10.62 ? ? ? ? ? ? 273  ASN A CA  1 
ATOM   2145 C  C   . ASN A 1 275 ? -16.829 16.169  0.071   1.00 14.77 ? ? ? ? ? ? 273  ASN A C   1 
ATOM   2146 O  O   . ASN A 1 275 ? -16.997 17.137  -0.675  1.00 17.13 ? ? ? ? ? ? 273  ASN A O   1 
ATOM   2147 C  CB  . ASN A 1 275 ? -16.248 13.755  -0.362  1.00 7.65  ? ? ? ? ? ? 273  ASN A CB  1 
ATOM   2148 C  CG  . ASN A 1 275 ? -15.994 13.052  0.972   1.00 16.07 ? ? ? ? ? ? 273  ASN A CG  1 
ATOM   2149 O  OD1 . ASN A 1 275 ? -15.979 13.686  2.034   1.00 20.62 ? ? ? ? ? ? 273  ASN A OD1 1 
ATOM   2150 N  ND2 . ASN A 1 275 ? -15.809 11.739  0.921   1.00 15.02 ? ? ? ? ? ? 273  ASN A ND2 1 
ATOM   2151 N  N   . THR A 1 276 ? -16.154 16.261  1.217   1.00 13.44 ? ? ? ? ? ? 274  THR A N   1 
ATOM   2152 C  CA  . THR A 1 276 ? -15.578 17.547  1.591   1.00 14.04 ? ? ? ? ? ? 274  THR A CA  1 
ATOM   2153 C  C   . THR A 1 276 ? -14.344 17.903  0.769   1.00 15.34 ? ? ? ? ? ? 274  THR A C   1 
ATOM   2154 O  O   . THR A 1 276 ? -13.906 19.060  0.803   1.00 20.27 ? ? ? ? ? ? 274  THR A O   1 
ATOM   2155 C  CB  . THR A 1 276 ? -15.237 17.544  3.077   1.00 17.49 ? ? ? ? ? ? 274  THR A CB  1 
ATOM   2156 O  OG1 . THR A 1 276 ? -14.276 16.513  3.336   1.00 17.76 ? ? ? ? ? ? 274  THR A OG1 1 
ATOM   2157 C  CG2 . THR A 1 276 ? -16.482 17.282  3.883   1.00 19.85 ? ? ? ? ? ? 274  THR A CG2 1 
ATOM   2158 N  N   . ARG A 1 277 ? -13.789 16.952  0.026   1.00 12.49 ? ? ? ? ? ? 275  ARG A N   1 
ATOM   2159 C  CA  . ARG A 1 277 ? -12.650 17.178  -0.849  1.00 12.25 ? ? ? ? ? ? 275  ARG A CA  1 
ATOM   2160 C  C   . ARG A 1 277 ? -13.032 16.786  -2.270  1.00 11.15 ? ? ? ? ? ? 275  ARG A C   1 
ATOM   2161 O  O   . ARG A 1 277 ? -13.943 15.976  -2.480  1.00 11.30 ? ? ? ? ? ? 275  ARG A O   1 
ATOM   2162 C  CB  . ARG A 1 277 ? -11.433 16.350  -0.404  1.00 19.36 ? ? ? ? ? ? 275  ARG A CB  1 
ATOM   2163 C  CG  . ARG A 1 277 ? -10.735 16.866  0.853   1.00 26.28 ? ? ? ? ? ? 275  ARG A CG  1 
ATOM   2164 C  CD  . ARG A 1 277 ? -9.551  15.972  1.229   1.00 32.74 ? ? ? ? ? ? 275  ARG A CD  1 
ATOM   2165 N  NE  . ARG A 1 277 ? -9.955  14.585  1.451   1.00 43.38 ? ? ? ? ? ? 275  ARG A NE  1 
ATOM   2166 C  CZ  . ARG A 1 277 ? -9.230  13.681  2.109   1.00 53.36 ? ? ? ? ? ? 275  ARG A CZ  1 
ATOM   2167 N  NH1 . ARG A 1 277 ? -8.048  14.009  2.615   1.00 57.37 ? ? ? ? ? ? 275  ARG A NH1 1 
ATOM   2168 N  NH2 . ARG A 1 277 ? -9.687  12.443  2.254   1.00 53.67 ? ? ? ? ? ? 275  ARG A NH2 1 
ATOM   2169 N  N   . GLU A 1 278 ? -12.324 17.364  -3.247  1.00 8.47  ? ? ? ? ? ? 276  GLU A N   1 
ATOM   2170 C  CA  . GLU A 1 278 ? -12.442 16.898  -4.626  1.00 10.49 ? ? ? ? ? ? 276  GLU A CA  1 
ATOM   2171 C  C   . GLU A 1 278 ? -12.135 15.408  -4.683  1.00 12.20 ? ? ? ? ? ? 276  GLU A C   1 
ATOM   2172 O  O   . GLU A 1 278 ? -11.361 14.887  -3.879  1.00 14.21 ? ? ? ? ? ? 276  GLU A O   1 
ATOM   2173 C  CB  . GLU A 1 278 ? -11.482 17.666  -5.543  1.00 9.10  ? ? ? ? ? ? 276  GLU A CB  1 
ATOM   2174 C  CG  . GLU A 1 278 ? -10.021 17.478  -5.137  1.00 14.13 ? ? ? ? ? ? 276  GLU A CG  1 
ATOM   2175 C  CD  . GLU A 1 278 ? -9.021  18.231  -6.002  1.00 21.98 ? ? ? ? ? ? 276  GLU A CD  1 
ATOM   2176 O  OE1 . GLU A 1 278 ? -9.435  18.919  -6.963  1.00 19.99 ? ? ? ? ? ? 276  GLU A OE1 1 
ATOM   2177 O  OE2 . GLU A 1 278 ? -7.808  18.116  -5.720  1.00 17.04 ? ? ? ? ? ? 276  GLU A OE2 1 
ATOM   2178 N  N   . ARG A 1 279 ? -12.756 14.708  -5.633  1.00 11.62 ? ? ? ? ? ? 277  ARG A N   1 
ATOM   2179 C  CA  . ARG A 1 279 ? -12.620 13.256  -5.723  1.00 11.96 ? ? ? ? ? ? 277  ARG A CA  1 
ATOM   2180 C  C   . ARG A 1 279 ? -12.394 12.848  -7.173  1.00 10.68 ? ? ? ? ? ? 277  ARG A C   1 
ATOM   2181 O  O   . ARG A 1 279 ? -13.129 13.286  -8.061  1.00 10.20 ? ? ? ? ? ? 277  ARG A O   1 
ATOM   2182 C  CB  . ARG A 1 279 ? -13.859 12.547  -5.170  1.00 13.21 ? ? ? ? ? ? 277  ARG A CB  1 
ATOM   2183 C  CG  . ARG A 1 279 ? -13.931 11.069  -5.542  1.00 10.24 ? ? ? ? ? ? 277  ARG A CG  1 
ATOM   2184 C  CD  . ARG A 1 279 ? -15.163 10.371  -4.968  1.00 11.04 ? ? ? ? ? ? 277  ARG A CD  1 
ATOM   2185 N  NE  . ARG A 1 279 ? -15.090 8.937   -5.252  1.00 11.86 ? ? ? ? ? ? 277  ARG A NE  1 
ATOM   2186 C  CZ  . ARG A 1 279 ? -15.650 8.362   -6.312  1.00 12.02 ? ? ? ? ? ? 277  ARG A CZ  1 
ATOM   2187 N  NH1 . ARG A 1 279 ? -16.338 9.100   -7.188  1.00 14.21 ? ? ? ? ? ? 277  ARG A NH1 1 
ATOM   2188 N  NH2 . ARG A 1 279 ? -15.510 7.058   -6.512  1.00 10.21 ? ? ? ? ? ? 277  ARG A NH2 1 
ATOM   2189 N  N   . PHE A 1 280 ? -11.384 12.012  -7.401  1.00 10.35 ? ? ? ? ? ? 278  PHE A N   1 
ATOM   2190 C  CA  . PHE A 1 280 ? -11.025 11.524  -8.728  1.00 8.26  ? ? ? ? ? ? 278  PHE A CA  1 
ATOM   2191 C  C   . PHE A 1 280 ? -11.393 10.056  -8.870  1.00 11.23 ? ? ? ? ? ? 278  PHE A C   1 
ATOM   2192 O  O   . PHE A 1 280 ? -11.224 9.269   -7.938  1.00 11.09 ? ? ? ? ? ? 278  PHE A O   1 
ATOM   2193 C  CB  . PHE A 1 280 ? -9.531  11.696  -8.978  1.00 8.55  ? ? ? ? ? ? 278  PHE A CB  1 
ATOM   2194 C  CG  . PHE A 1 280 ? -9.105  13.127  -9.033  1.00 9.69  ? ? ? ? ? ? 278  PHE A CG  1 
ATOM   2195 C  CD1 . PHE A 1 280 ? -8.781  13.823  -7.865  1.00 12.36 ? ? ? ? ? ? 278  PHE A CD1 1 
ATOM   2196 C  CD2 . PHE A 1 280 ? -9.056  13.790  -10.246 1.00 9.74  ? ? ? ? ? ? 278  PHE A CD2 1 
ATOM   2197 C  CE1 . PHE A 1 280 ? -8.407  15.162  -7.910  1.00 11.77 ? ? ? ? ? ? 278  PHE A CE1 1 
ATOM   2198 C  CE2 . PHE A 1 280 ? -8.678  15.136  -10.308 1.00 14.38 ? ? ? ? ? ? 278  PHE A CE2 1 
ATOM   2199 C  CZ  . PHE A 1 280 ? -8.354  15.820  -9.133  1.00 10.49 ? ? ? ? ? ? 278  PHE A CZ  1 
ATOM   2200 N  N   . ALA A 1 281 ? -11.885 9.688   -10.047 1.00 8.32  ? ? ? ? ? ? 279  ALA A N   1 
ATOM   2201 C  CA  . ALA A 1 281 ? -12.211 8.299   -10.304 1.00 8.02  ? ? ? ? ? ? 279  ALA A CA  1 
ATOM   2202 C  C   . ALA A 1 281 ? -12.138 8.073   -11.800 1.00 11.73 ? ? ? ? ? ? 279  ALA A C   1 
ATOM   2203 O  O   . ALA A 1 281 ? -12.133 9.025   -12.588 1.00 9.87  ? ? ? ? ? ? 279  ALA A O   1 
ATOM   2204 C  CB  . ALA A 1 281 ? -13.597 7.931   -9.765  1.00 8.63  ? ? ? ? ? ? 279  ALA A CB  1 
ATOM   2205 N  N   . CYS A 1 282 ? -12.069 6.796   -12.185 1.00 10.14 ? ? ? ? ? ? 280  CYS A N   1 
ATOM   2206 C  CA  . CYS A 1 282 ? -12.100 6.402   -13.587 1.00 6.26  ? ? ? ? ? ? 280  CYS A CA  1 
ATOM   2207 C  C   . CYS A 1 282 ? -13.080 5.255   -13.736 1.00 11.78 ? ? ? ? ? ? 280  CYS A C   1 
ATOM   2208 O  O   . CYS A 1 282 ? -13.073 4.317   -12.936 1.00 12.31 ? ? ? ? ? ? 280  CYS A O   1 
ATOM   2209 C  CB  . CYS A 1 282 ? -10.724 5.956   -14.100 1.00 10.89 ? ? ? ? ? ? 280  CYS A CB  1 
ATOM   2210 S  SG  . CYS A 1 282 ? -9.487  7.280   -14.164 1.00 19.05 ? ? ? ? ? ? 280  CYS A SG  1 
ATOM   2211 N  N   . ALA A 1 283 ? -13.919 5.334   -14.761 1.00 11.27 ? ? ? ? ? ? 281  ALA A N   1 
ATOM   2212 C  CA  . ALA A 1 283 ? -14.847 4.265   -15.096 1.00 11.50 ? ? ? ? ? ? 281  ALA A CA  1 
ATOM   2213 C  C   . ALA A 1 283 ? -14.514 3.768   -16.496 1.00 8.17  ? ? ? ? ? ? 281  ALA A C   1 
ATOM   2214 O  O   . ALA A 1 283 ? -14.646 4.517   -17.467 1.00 9.77  ? ? ? ? ? ? 281  ALA A O   1 
ATOM   2215 C  CB  . ALA A 1 283 ? -16.296 4.755   -15.016 1.00 10.84 ? ? ? ? ? ? 281  ALA A CB  1 
ATOM   2216 N  N   . TYR A 1 284 ? -14.085 2.509   -16.594 1.00 8.45  ? ? ? ? ? ? 282  TYR A N   1 
ATOM   2217 C  CA  . TYR A 1 284 ? -13.702 1.890   -17.859 1.00 8.60  ? ? ? ? ? ? 282  TYR A CA  1 
ATOM   2218 C  C   . TYR A 1 284 ? -14.805 0.958   -18.347 1.00 9.72  ? ? ? ? ? ? 282  TYR A C   1 
ATOM   2219 O  O   . TYR A 1 284 ? -15.251 0.068   -17.610 1.00 8.93  ? ? ? ? ? ? 282  TYR A O   1 
ATOM   2220 C  CB  . TYR A 1 284 ? -12.386 1.119   -17.701 1.00 8.95  ? ? ? ? ? ? 282  TYR A CB  1 
ATOM   2221 C  CG  . TYR A 1 284 ? -12.035 0.231   -18.862 1.00 9.66  ? ? ? ? ? ? 282  TYR A CG  1 
ATOM   2222 C  CD1 . TYR A 1 284 ? -11.411 0.749   -19.993 1.00 12.18 ? ? ? ? ? ? 282  TYR A CD1 1 
ATOM   2223 C  CD2 . TYR A 1 284 ? -12.320 -1.141  -18.828 1.00 11.99 ? ? ? ? ? ? 282  TYR A CD2 1 
ATOM   2224 C  CE1 . TYR A 1 284 ? -11.078 -0.073  -21.062 1.00 11.90 ? ? ? ? ? ? 282  TYR A CE1 1 
ATOM   2225 C  CE2 . TYR A 1 284 ? -11.986 -1.973  -19.883 1.00 8.32  ? ? ? ? ? ? 282  TYR A CE2 1 
ATOM   2226 C  CZ  . TYR A 1 284 ? -11.370 -1.437  -20.998 1.00 7.68  ? ? ? ? ? ? 282  TYR A CZ  1 
ATOM   2227 O  OH  . TYR A 1 284 ? -11.046 -2.260  -22.066 1.00 6.72  ? ? ? ? ? ? 282  TYR A OH  1 
ATOM   2228 N  N   . PHE A 1 285 ? -15.224 1.153   -19.599 1.00 7.93  ? ? ? ? ? ? 283  PHE A N   1 
ATOM   2229 C  CA  . PHE A 1 285 ? -16.266 0.355   -20.228 1.00 10.19 ? ? ? ? ? ? 283  PHE A CA  1 
ATOM   2230 C  C   . PHE A 1 285 ? -15.614 -0.605  -21.216 1.00 8.86  ? ? ? ? ? ? 283  PHE A C   1 
ATOM   2231 O  O   . PHE A 1 285 ? -15.003 -0.166  -22.197 1.00 10.21 ? ? ? ? ? ? 283  PHE A O   1 
ATOM   2232 C  CB  . PHE A 1 285 ? -17.285 1.256   -20.929 1.00 12.55 ? ? ? ? ? ? 283  PHE A CB  1 
ATOM   2233 C  CG  . PHE A 1 285 ? -17.950 2.245   -20.003 1.00 13.21 ? ? ? ? ? ? 283  PHE A CG  1 
ATOM   2234 C  CD1 . PHE A 1 285 ? -18.143 1.938   -18.669 1.00 16.12 ? ? ? ? ? ? 283  PHE A CD1 1 
ATOM   2235 C  CD2 . PHE A 1 285 ? -18.355 3.483   -20.458 1.00 23.77 ? ? ? ? ? ? 283  PHE A CD2 1 
ATOM   2236 C  CE1 . PHE A 1 285 ? -18.747 2.848   -17.802 1.00 20.57 ? ? ? ? ? ? 283  PHE A CE1 1 
ATOM   2237 C  CE2 . PHE A 1 285 ? -18.960 4.402   -19.595 1.00 28.32 ? ? ? ? ? ? 283  PHE A CE2 1 
ATOM   2238 C  CZ  . PHE A 1 285 ? -19.155 4.078   -18.268 1.00 22.30 ? ? ? ? ? ? 283  PHE A CZ  1 
ATOM   2239 N  N   . HIS A 1 286 ? -15.726 -1.907  -20.946 1.00 8.37  ? ? ? ? ? ? 284  HIS A N   1 
ATOM   2240 C  CA  . HIS A 1 286 ? -15.196 -2.946  -21.822 1.00 10.26 ? ? ? ? ? ? 284  HIS A CA  1 
ATOM   2241 C  C   . HIS A 1 286 ? -16.343 -3.421  -22.710 1.00 10.96 ? ? ? ? ? ? 284  HIS A C   1 
ATOM   2242 O  O   . HIS A 1 286 ? -17.279 -4.069  -22.225 1.00 10.70 ? ? ? ? ? ? 284  HIS A O   1 
ATOM   2243 C  CB  . HIS A 1 286 ? -14.592 -4.089  -21.007 1.00 5.82  ? ? ? ? ? ? 284  HIS A CB  1 
ATOM   2244 C  CG  . HIS A 1 286 ? -13.674 -4.971  -21.796 1.00 9.69  ? ? ? ? ? ? 284  HIS A CG  1 
ATOM   2245 N  ND1 . HIS A 1 286 ? -12.390 -4.599  -22.140 1.00 9.36  ? ? ? ? ? ? 284  HIS A ND1 1 
ATOM   2246 C  CD2 . HIS A 1 286 ? -13.867 -6.198  -22.332 1.00 8.50  ? ? ? ? ? ? 284  HIS A CD2 1 
ATOM   2247 C  CE1 . HIS A 1 286 ? -11.826 -5.568  -22.840 1.00 11.24 ? ? ? ? ? ? 284  HIS A CE1 1 
ATOM   2248 N  NE2 . HIS A 1 286 ? -12.704 -6.546  -22.979 1.00 11.28 ? ? ? ? ? ? 284  HIS A NE2 1 
ATOM   2249 N  N   . GLU A 1 287 ? -16.275 -3.091  -24.004 1.00 8.55  ? ? ? ? ? ? 285  GLU A N   1 
ATOM   2250 C  CA  . GLU A 1 287 ? -17.430 -3.042  -24.890 1.00 9.18  ? ? ? ? ? ? 285  GLU A CA  1 
ATOM   2251 C  C   . GLU A 1 287 ? -17.312 -3.975  -26.091 1.00 10.82 ? ? ? ? ? ? 285  GLU A C   1 
ATOM   2252 O  O   . GLU A 1 287 ? -16.206 -4.340  -26.506 1.00 8.54  ? ? ? ? ? ? 285  GLU A O   1 
ATOM   2253 C  CB  . GLU A 1 287 ? -17.633 -1.606  -25.415 1.00 7.79  ? ? ? ? ? ? 285  GLU A CB  1 
ATOM   2254 C  CG  . GLU A 1 287 ? -17.844 -0.556  -24.344 1.00 9.40  ? ? ? ? ? ? 285  GLU A CG  1 
ATOM   2255 C  CD  . GLU A 1 287 ? -19.173 -0.701  -23.633 1.00 12.42 ? ? ? ? ? ? 285  GLU A CD  1 
ATOM   2256 O  OE1 . GLU A 1 287 ? -19.331 -1.650  -22.841 1.00 16.22 ? ? ? ? ? ? 285  GLU A OE1 1 
ATOM   2257 O  OE2 . GLU A 1 287 ? -20.057 0.146   -23.865 1.00 12.51 ? ? ? ? ? ? 285  GLU A OE2 1 
ATOM   2258 N  N   . PRO A 1 288 ? -18.443 -4.345  -26.701 1.00 9.17  ? ? ? ? ? ? 286  PRO A N   1 
ATOM   2259 C  CA  . PRO A 1 288 ? -18.394 -4.988  -28.018 1.00 8.25  ? ? ? ? ? ? 286  PRO A CA  1 
ATOM   2260 C  C   . PRO A 1 288 ? -17.741 -4.093  -29.057 1.00 8.75  ? ? ? ? ? ? 286  PRO A C   1 
ATOM   2261 O  O   . PRO A 1 288 ? -17.651 -2.873  -28.907 1.00 7.52  ? ? ? ? ? ? 286  PRO A O   1 
ATOM   2262 C  CB  . PRO A 1 288 ? -19.872 -5.215  -28.365 1.00 8.32  ? ? ? ? ? ? 286  PRO A CB  1 
ATOM   2263 C  CG  . PRO A 1 288 ? -20.596 -5.151  -27.041 1.00 12.39 ? ? ? ? ? ? 286  PRO A CG  1 
ATOM   2264 C  CD  . PRO A 1 288 ? -19.829 -4.138  -26.244 1.00 13.76 ? ? ? ? ? ? 286  PRO A CD  1 
ATOM   2265 N  N   . ASN A 1 289 ? -17.292 -4.740  -30.133 1.00 10.20 ? ? ? ? ? ? 287  ASN A N   1 
ATOM   2266 C  CA  . ASN A 1 289 ? -16.938 -4.056  -31.368 1.00 8.03  ? ? ? ? ? ? 287  ASN A CA  1 
ATOM   2267 C  C   . ASN A 1 289 ? -18.088 -3.172  -31.837 1.00 11.61 ? ? ? ? ? ? 287  ASN A C   1 
ATOM   2268 O  O   . ASN A 1 289 ? -19.266 -3.496  -31.656 1.00 9.78  ? ? ? ? ? ? 287  ASN A O   1 
ATOM   2269 C  CB  . ASN A 1 289 ? -16.598 -5.110  -32.429 1.00 8.92  ? ? ? ? ? ? 287  ASN A CB  1 
ATOM   2270 C  CG  . ASN A 1 289 ? -16.015 -4.516  -33.680 1.00 15.27 ? ? ? ? ? ? 287  ASN A CG  1 
ATOM   2271 O  OD1 . ASN A 1 289 ? -16.727 -3.904  -34.483 1.00 10.04 ? ? ? ? ? ? 287  ASN A OD1 1 
ATOM   2272 N  ND2 . ASN A 1 289 ? -14.708 -4.689  -33.858 1.00 9.99  ? ? ? ? ? ? 287  ASN A ND2 1 
ATOM   2273 N  N   . PHE A 1 290 ? -17.732 -2.045  -32.461 1.00 8.80  ? ? ? ? ? ? 288  PHE A N   1 
ATOM   2274 C  CA  . PHE A 1 290 ? -18.727 -1.126  -33.008 1.00 13.21 ? ? ? ? ? ? 288  PHE A CA  1 
ATOM   2275 C  C   . PHE A 1 290 ? -19.686 -1.823  -33.968 1.00 9.99  ? ? ? ? ? ? 288  PHE A C   1 
ATOM   2276 O  O   . PHE A 1 290 ? -20.844 -1.410  -34.093 1.00 11.59 ? ? ? ? ? ? 288  PHE A O   1 
ATOM   2277 C  CB  . PHE A 1 290 ? -18.003 0.029   -33.704 1.00 9.75  ? ? ? ? ? ? 288  PHE A CB  1 
ATOM   2278 C  CG  . PHE A 1 290 ? -18.853 1.243   -33.939 1.00 10.47 ? ? ? ? ? ? 288  PHE A CG  1 
ATOM   2279 C  CD1 . PHE A 1 290 ? -19.421 1.476   -35.182 1.00 10.51 ? ? ? ? ? ? 288  PHE A CD1 1 
ATOM   2280 C  CD2 . PHE A 1 290 ? -19.044 2.178   -32.930 1.00 9.80  ? ? ? ? ? ? 288  PHE A CD2 1 
ATOM   2281 C  CE1 . PHE A 1 290 ? -20.184 2.603   -35.417 1.00 13.56 ? ? ? ? ? ? 288  PHE A CE1 1 
ATOM   2282 C  CE2 . PHE A 1 290 ? -19.805 3.319   -33.157 1.00 15.25 ? ? ? ? ? ? 288  PHE A CE2 1 
ATOM   2283 C  CZ  . PHE A 1 290 ? -20.379 3.531   -34.397 1.00 11.30 ? ? ? ? ? ? 288  PHE A CZ  1 
ATOM   2284 N  N   . GLU A 1 291 ? -19.239 -2.888  -34.634 1.00 10.82 ? ? ? ? ? ? 289  GLU A N   1 
ATOM   2285 C  CA  . GLU A 1 291 ? -20.055 -3.614  -35.602 1.00 12.65 ? ? ? ? ? ? 289  GLU A CA  1 
ATOM   2286 C  C   . GLU A 1 291 ? -20.718 -4.865  -35.033 1.00 14.84 ? ? ? ? ? ? 289  GLU A C   1 
ATOM   2287 O  O   . GLU A 1 291 ? -21.456 -5.535  -35.759 1.00 12.92 ? ? ? ? ? ? 289  GLU A O   1 
ATOM   2288 C  CB  . GLU A 1 291 ? -19.214 -4.002  -36.822 1.00 10.15 ? ? ? ? ? ? 289  GLU A CB  1 
ATOM   2289 C  CG  . GLU A 1 291 ? -18.613 -2.801  -37.575 1.00 14.33 ? ? ? ? ? ? 289  GLU A CG  1 
ATOM   2290 C  CD  . GLU A 1 291 ? -17.661 -3.238  -38.677 1.00 17.98 ? ? ? ? ? ? 289  GLU A CD  1 
ATOM   2291 O  OE1 . GLU A 1 291 ? -18.140 -3.804  -39.687 1.00 16.17 ? ? ? ? ? ? 289  GLU A OE1 1 
ATOM   2292 O  OE2 . GLU A 1 291 ? -16.438 -3.051  -38.520 1.00 15.45 ? ? ? ? ? ? 289  GLU A OE2 1 
ATOM   2293 N  N   . ALA A 1 292 ? -20.492 -5.188  -33.765 1.00 11.50 ? ? ? ? ? ? 290  ALA A N   1 
ATOM   2294 C  CA  . ALA A 1 292 ? -21.076 -6.381  -33.161 1.00 11.97 ? ? ? ? ? ? 290  ALA A CA  1 
ATOM   2295 C  C   . ALA A 1 292 ? -22.478 -6.101  -32.633 1.00 16.42 ? ? ? ? ? ? 290  ALA A C   1 
ATOM   2296 O  O   . ALA A 1 292 ? -22.809 -4.967  -32.269 1.00 14.33 ? ? ? ? ? ? 290  ALA A O   1 
ATOM   2297 C  CB  . ALA A 1 292 ? -20.189 -6.895  -32.023 1.00 11.77 ? ? ? ? ? ? 290  ALA A CB  1 
ATOM   2298 N  N   . SER A 1 293 ? -23.300 -7.152  -32.582 1.00 12.72 ? ? ? ? ? ? 291  SER A N   1 
ATOM   2299 C  CA  . SER A 1 293 ? -24.642 -7.083  -32.008 1.00 13.39 ? ? ? ? ? ? 291  SER A CA  1 
ATOM   2300 C  C   . SER A 1 293 ? -24.760 -8.029  -30.821 1.00 13.28 ? ? ? ? ? ? 291  SER A C   1 
ATOM   2301 O  O   . SER A 1 293 ? -24.429 -9.217  -30.926 1.00 16.27 ? ? ? ? ? ? 291  SER A O   1 
ATOM   2302 C  CB  . SER A 1 293 ? -25.729 -7.430  -33.034 1.00 15.94 ? ? ? ? ? ? 291  SER A CB  1 
ATOM   2303 O  OG  . SER A 1 293 ? -25.751 -6.514  -34.112 1.00 16.48 ? ? ? ? ? ? 291  SER A OG  1 
ATOM   2304 N  N   . ALA A 1 294 ? -25.238 -7.496  -29.700 1.00 15.68 ? ? ? ? ? ? 292  ALA A N   1 
ATOM   2305 C  CA  . ALA A 1 294 ? -25.578 -8.326  -28.553 1.00 15.24 ? ? ? ? ? ? 292  ALA A CA  1 
ATOM   2306 C  C   . ALA A 1 294 ? -26.882 -9.071  -28.816 1.00 13.41 ? ? ? ? ? ? 292  ALA A C   1 
ATOM   2307 O  O   . ALA A 1 294 ? -27.752 -8.600  -29.552 1.00 13.50 ? ? ? ? ? ? 292  ALA A O   1 
ATOM   2308 C  CB  . ALA A 1 294 ? -25.712 -7.468  -27.293 1.00 10.30 ? ? ? ? ? ? 292  ALA A CB  1 
ATOM   2309 N  N   . TYR A 1 295 ? -27.029 -10.226 -28.173 1.00 13.36 ? ? ? ? ? ? 293  TYR A N   1 
ATOM   2310 C  CA  . TYR A 1 295 ? -28.178 -11.090 -28.394 1.00 12.90 ? ? ? ? ? ? 293  TYR A CA  1 
ATOM   2311 C  C   . TYR A 1 295 ? -28.468 -11.845 -27.105 1.00 14.23 ? ? ? ? ? ? 293  TYR A C   1 
ATOM   2312 O  O   . TYR A 1 295 ? -27.571 -12.025 -26.276 1.00 13.42 ? ? ? ? ? ? 293  TYR A O   1 
ATOM   2313 C  CB  . TYR A 1 295 ? -27.918 -12.082 -29.538 1.00 19.92 ? ? ? ? ? ? 293  TYR A CB  1 
ATOM   2314 C  CG  . TYR A 1 295 ? -26.746 -12.997 -29.274 1.00 15.70 ? ? ? ? ? ? 293  TYR A CG  1 
ATOM   2315 C  CD1 . TYR A 1 295 ? -26.939 -14.284 -28.775 1.00 15.88 ? ? ? ? ? ? 293  TYR A CD1 1 
ATOM   2316 C  CD2 . TYR A 1 295 ? -25.443 -12.580 -29.520 1.00 13.69 ? ? ? ? ? ? 293  TYR A CD2 1 
ATOM   2317 C  CE1 . TYR A 1 295 ? -25.864 -15.129 -28.524 1.00 13.71 ? ? ? ? ? ? 293  TYR A CE1 1 
ATOM   2318 C  CE2 . TYR A 1 295 ? -24.362 -13.421 -29.268 1.00 12.59 ? ? ? ? ? ? 293  TYR A CE2 1 
ATOM   2319 C  CZ  . TYR A 1 295 ? -24.584 -14.696 -28.775 1.00 16.83 ? ? ? ? ? ? 293  TYR A CZ  1 
ATOM   2320 O  OH  . TYR A 1 295 ? -23.515 -15.533 -28.528 1.00 16.31 ? ? ? ? ? ? 293  TYR A OH  1 
ATOM   2321 N  N   . PRO A 1 296 ? -29.705 -12.307 -26.912 1.00 15.20 ? ? ? ? ? ? 294  PRO A N   1 
ATOM   2322 C  CA  . PRO A 1 296 ? -30.037 -13.021 -25.666 1.00 17.46 ? ? ? ? ? ? 294  PRO A CA  1 
ATOM   2323 C  C   . PRO A 1 296 ? -29.476 -14.432 -25.675 1.00 17.23 ? ? ? ? ? ? 294  PRO A C   1 
ATOM   2324 O  O   . PRO A 1 296 ? -29.769 -15.229 -26.568 1.00 19.32 ? ? ? ? ? ? 294  PRO A O   1 
ATOM   2325 C  CB  . PRO A 1 296 ? -31.572 -13.016 -25.643 1.00 23.16 ? ? ? ? ? ? 294  PRO A CB  1 
ATOM   2326 C  CG  . PRO A 1 296 ? -32.003 -12.612 -26.978 1.00 24.16 ? ? ? ? ? ? 294  PRO A CG  1 
ATOM   2327 C  CD  . PRO A 1 296 ? -30.902 -11.880 -27.645 1.00 17.13 ? ? ? ? ? ? 294  PRO A CD  1 
ATOM   2328 N  N   . LEU A 1 297 ? -28.684 -14.746 -24.647 1.00 16.30 ? ? ? ? ? ? 295  LEU A N   1 
ATOM   2329 C  CA  . LEU A 1 297 ? -27.943 -16.001 -24.593 1.00 18.86 ? ? ? ? ? ? 295  LEU A CA  1 
ATOM   2330 C  C   . LEU A 1 297 ? -28.834 -17.193 -24.261 1.00 18.10 ? ? ? ? ? ? 295  LEU A C   1 
ATOM   2331 O  O   . LEU A 1 297 ? -28.574 -18.307 -24.726 1.00 20.47 ? ? ? ? ? ? 295  LEU A O   1 
ATOM   2332 C  CB  . LEU A 1 297 ? -26.828 -15.888 -23.553 1.00 14.05 ? ? ? ? ? ? 295  LEU A CB  1 
ATOM   2333 C  CG  . LEU A 1 297 ? -25.676 -14.949 -23.901 1.00 17.10 ? ? ? ? ? ? 295  LEU A CG  1 
ATOM   2334 C  CD1 . LEU A 1 297 ? -24.858 -14.602 -22.668 1.00 15.48 ? ? ? ? ? ? 295  LEU A CD1 1 
ATOM   2335 C  CD2 . LEU A 1 297 ? -24.810 -15.616 -24.949 1.00 21.32 ? ? ? ? ? ? 295  LEU A CD2 1 
ATOM   2336 N  N   . PHE A 1 298 ? -29.869 -16.988 -23.452 1.00 20.89 ? ? ? ? ? ? 296  PHE A N   1 
ATOM   2337 C  CA  . PHE A 1 298 ? -30.668 -18.080 -22.911 1.00 23.59 ? ? ? ? ? ? 296  PHE A CA  1 
ATOM   2338 C  C   . PHE A 1 298 ? -32.069 -18.142 -23.508 1.00 37.98 ? ? ? ? ? ? 296  PHE A C   1 
ATOM   2339 O  O   . PHE A 1 298 ? -32.916 -18.876 -22.993 1.00 38.06 ? ? ? ? ? ? 296  PHE A O   1 
ATOM   2340 C  CB  . PHE A 1 298 ? -30.738 -17.959 -21.387 1.00 19.04 ? ? ? ? ? ? 296  PHE A CB  1 
ATOM   2341 C  CG  . PHE A 1 298 ? -29.394 -17.772 -20.738 1.00 21.11 ? ? ? ? ? ? 296  PHE A CG  1 
ATOM   2342 C  CD1 . PHE A 1 298 ? -28.348 -18.637 -21.030 1.00 19.08 ? ? ? ? ? ? 296  PHE A CD1 1 
ATOM   2343 C  CD2 . PHE A 1 298 ? -29.170 -16.724 -19.852 1.00 17.36 ? ? ? ? ? ? 296  PHE A CD2 1 
ATOM   2344 C  CE1 . PHE A 1 298 ? -27.104 -18.465 -20.443 1.00 21.16 ? ? ? ? ? ? 296  PHE A CE1 1 
ATOM   2345 C  CE2 . PHE A 1 298 ? -27.933 -16.549 -19.264 1.00 18.63 ? ? ? ? ? ? 296  PHE A CE2 1 
ATOM   2346 C  CZ  . PHE A 1 298 ? -26.899 -17.417 -19.554 1.00 21.19 ? ? ? ? ? ? 296  PHE A CZ  1 
ATOM   2347 N  N   . GLU A 1 299 ? -32.334 -17.385 -24.577 1.00 32.49 ? ? ? ? ? ? 297  GLU A N   1 
ATOM   2348 C  CA  . GLU A 1 299 ? -33.595 -17.451 -25.318 1.00 40.83 ? ? ? ? ? ? 297  GLU A CA  1 
ATOM   2349 C  C   . GLU A 1 299 ? -33.233 -17.539 -26.795 1.00 50.78 ? ? ? ? ? ? 297  GLU A C   1 
ATOM   2350 O  O   . GLU A 1 299 ? -33.201 -16.522 -27.502 1.00 46.89 ? ? ? ? ? ? 297  GLU A O   1 
ATOM   2351 C  CB  . GLU A 1 299 ? -34.487 -16.245 -25.016 1.00 41.86 ? ? ? ? ? ? 297  GLU A CB  1 
ATOM   2352 N  N   A PRO A 1 300 ? -32.980 -18.750 -27.302 0.49 57.14 ? ? ? ? ? ? 298  PRO A N   1 
ATOM   2353 N  N   B PRO A 1 300 ? -32.935 -18.743 -27.295 0.51 57.12 ? ? ? ? ? ? 298  PRO A N   1 
ATOM   2354 C  CA  A PRO A 1 300 ? -32.456 -18.880 -28.671 0.49 58.25 ? ? ? ? ? ? 298  PRO A CA  1 
ATOM   2355 C  CA  B PRO A 1 300 ? -32.435 -18.859 -28.677 0.51 58.25 ? ? ? ? ? ? 298  PRO A CA  1 
ATOM   2356 C  C   A PRO A 1 300 ? -33.439 -18.463 -29.749 0.49 55.93 ? ? ? ? ? ? 298  PRO A C   1 
ATOM   2357 C  C   B PRO A 1 300 ? -33.437 -18.453 -29.750 0.51 55.93 ? ? ? ? ? ? 298  PRO A C   1 
ATOM   2358 O  O   A PRO A 1 300 ? -33.010 -18.178 -30.873 0.49 56.41 ? ? ? ? ? ? 298  PRO A O   1 
ATOM   2359 O  O   B PRO A 1 300 ? -33.016 -18.170 -30.878 0.51 56.41 ? ? ? ? ? ? 298  PRO A O   1 
ATOM   2360 C  CB  A PRO A 1 300 ? -32.122 -20.373 -28.774 0.49 58.87 ? ? ? ? ? ? 298  PRO A CB  1 
ATOM   2361 C  CB  B PRO A 1 300 ? -32.069 -20.345 -28.793 0.51 58.86 ? ? ? ? ? ? 298  PRO A CB  1 
ATOM   2362 C  CG  A PRO A 1 300 ? -33.085 -21.024 -27.831 0.49 59.84 ? ? ? ? ? ? 298  PRO A CG  1 
ATOM   2363 C  CG  B PRO A 1 300 ? -31.832 -20.785 -27.377 0.51 57.67 ? ? ? ? ? ? 298  PRO A CG  1 
ATOM   2364 C  CD  A PRO A 1 300 ? -33.268 -20.059 -26.688 0.49 56.41 ? ? ? ? ? ? 298  PRO A CD  1 
ATOM   2365 C  CD  B PRO A 1 300 ? -32.838 -20.020 -26.568 0.51 55.99 ? ? ? ? ? ? 298  PRO A CD  1 
ATOM   2366 N  N   . SER A 1 301 ? -34.736 -18.411 -29.451 1.00 52.65 ? ? ? ? ? ? 299  SER A N   1 
ATOM   2367 C  CA  . SER A 1 301 ? -35.747 -18.058 -30.439 1.00 59.99 ? ? ? ? ? ? 299  SER A CA  1 
ATOM   2368 C  C   . SER A 1 301 ? -36.183 -16.596 -30.347 1.00 58.71 ? ? ? ? ? ? 299  SER A C   1 
ATOM   2369 O  O   . SER A 1 301 ? -37.225 -16.231 -30.906 1.00 54.81 ? ? ? ? ? ? 299  SER A O   1 
ATOM   2370 C  CB  . SER A 1 301 ? -36.959 -18.983 -30.306 1.00 56.08 ? ? ? ? ? ? 299  SER A CB  1 
ATOM   2371 N  N   . ALA A 1 302 ? -35.410 -15.751 -29.663 1.00 47.42 ? ? ? ? ? ? 300  ALA A N   1 
ATOM   2372 C  CA  . ALA A 1 302 ? -35.757 -14.343 -29.517 1.00 39.71 ? ? ? ? ? ? 300  ALA A CA  1 
ATOM   2373 C  C   . ALA A 1 302 ? -35.070 -13.516 -30.597 1.00 32.52 ? ? ? ? ? ? 300  ALA A C   1 
ATOM   2374 O  O   . ALA A 1 302 ? -33.888 -13.716 -30.891 1.00 32.59 ? ? ? ? ? ? 300  ALA A O   1 
ATOM   2375 C  CB  . ALA A 1 302 ? -35.369 -13.832 -28.129 1.00 39.78 ? ? ? ? ? ? 300  ALA A CB  1 
ATOM   2376 N  N   . ASN A 1 303 ? -35.821 -12.591 -31.197 1.00 35.57 ? ? ? ? ? ? 301  ASN A N   1 
ATOM   2377 C  CA  . ASN A 1 303 ? -35.276 -11.767 -32.271 1.00 41.69 ? ? ? ? ? ? 301  ASN A CA  1 
ATOM   2378 C  C   . ASN A 1 303 ? -34.560 -10.514 -31.771 1.00 32.31 ? ? ? ? ? ? 301  ASN A C   1 
ATOM   2379 O  O   . ASN A 1 303 ? -33.862 -9.868  -32.559 1.00 34.65 ? ? ? ? ? ? 301  ASN A O   1 
ATOM   2380 C  CB  . ASN A 1 303 ? -36.384 -11.378 -33.279 1.00 43.88 ? ? ? ? ? ? 301  ASN A CB  1 
ATOM   2381 C  CG  . ASN A 1 303 ? -37.391 -10.340 -32.735 1.00 51.47 ? ? ? ? ? ? 301  ASN A CG  1 
ATOM   2382 O  OD1 . ASN A 1 303 ? -37.232 -9.778  -31.650 1.00 57.00 ? ? ? ? ? ? 301  ASN A OD1 1 
ATOM   2383 N  ND2 . ASN A 1 303 ? -38.435 -10.081 -33.522 1.00 51.94 ? ? ? ? ? ? 301  ASN A ND2 1 
ATOM   2384 N  N   . GLU A 1 304 ? -34.712 -10.164 -30.492 1.00 25.32 ? ? ? ? ? ? 302  GLU A N   1 
ATOM   2385 C  CA  . GLU A 1 304 ? -34.133 -8.932  -29.974 1.00 25.03 ? ? ? ? ? ? 302  GLU A CA  1 
ATOM   2386 C  C   . GLU A 1 304 ? -32.620 -8.908  -30.164 1.00 17.75 ? ? ? ? ? ? 302  GLU A C   1 
ATOM   2387 O  O   . GLU A 1 304 ? -31.930 -9.903  -29.941 1.00 17.81 ? ? ? ? ? ? 302  GLU A O   1 
ATOM   2388 C  CB  . GLU A 1 304 ? -34.475 -8.776  -28.493 1.00 26.37 ? ? ? ? ? ? 302  GLU A CB  1 
ATOM   2389 C  CG  . GLU A 1 304 ? -35.928 -8.410  -28.227 1.00 32.90 ? ? ? ? ? ? 302  GLU A CG  1 
ATOM   2390 C  CD  . GLU A 1 304 ? -36.875 -9.600  -28.326 1.00 35.87 ? ? ? ? ? ? 302  GLU A CD  1 
ATOM   2391 O  OE1 . GLU A 1 304 ? -36.401 -10.758 -28.309 1.00 31.54 ? ? ? ? ? ? 302  GLU A OE1 1 
ATOM   2392 O  OE2 . GLU A 1 304 ? -38.098 -9.365  -28.423 1.00 40.75 ? ? ? ? ? ? 302  GLU A OE2 1 
ATOM   2393 N  N   . ARG A 1 305 ? -32.112 -7.755  -30.597 1.00 22.79 ? ? ? ? ? ? 303  ARG A N   1 
ATOM   2394 C  CA  . ARG A 1 305 ? -30.683 -7.520  -30.755 1.00 20.60 ? ? ? ? ? ? 303  ARG A CA  1 
ATOM   2395 C  C   . ARG A 1 305 ? -30.368 -6.106  -30.292 1.00 18.29 ? ? ? ? ? ? 303  ARG A C   1 
ATOM   2396 O  O   . ARG A 1 305 ? -31.235 -5.226  -30.308 1.00 21.30 ? ? ? ? ? ? 303  ARG A O   1 
ATOM   2397 C  CB  . ARG A 1 305 ? -30.213 -7.684  -32.214 1.00 23.09 ? ? ? ? ? ? 303  ARG A CB  1 
ATOM   2398 C  CG  . ARG A 1 305 ? -30.439 -9.067  -32.829 1.00 20.73 ? ? ? ? ? ? 303  ARG A CG  1 
ATOM   2399 C  CD  . ARG A 1 305 ? -29.535 -10.117 -32.200 1.00 20.43 ? ? ? ? ? ? 303  ARG A CD  1 
ATOM   2400 N  NE  . ARG A 1 305 ? -29.660 -11.422 -32.848 1.00 28.03 ? ? ? ? ? ? 303  ARG A NE  1 
ATOM   2401 C  CZ  . ARG A 1 305 ? -30.515 -12.372 -32.476 1.00 28.46 ? ? ? ? ? ? 303  ARG A CZ  1 
ATOM   2402 N  NH1 . ARG A 1 305 ? -31.343 -12.168 -31.458 1.00 24.29 ? ? ? ? ? ? 303  ARG A NH1 1 
ATOM   2403 N  NH2 . ARG A 1 305 ? -30.550 -13.523 -33.130 1.00 25.06 ? ? ? ? ? ? 303  ARG A NH2 1 
ATOM   2404 N  N   . ILE A 1 306 ? -29.121 -5.893  -29.881 1.00 18.38 ? ? ? ? ? ? 304  ILE A N   1 
ATOM   2405 C  CA  . ILE A 1 306 ? -28.576 -4.552  -29.678 1.00 16.87 ? ? ? ? ? ? 304  ILE A CA  1 
ATOM   2406 C  C   . ILE A 1 306 ? -27.335 -4.438  -30.552 1.00 14.91 ? ? ? ? ? ? 304  ILE A C   1 
ATOM   2407 O  O   . ILE A 1 306 ? -26.279 -4.995  -30.231 1.00 13.90 ? ? ? ? ? ? 304  ILE A O   1 
ATOM   2408 C  CB  . ILE A 1 306 ? -28.246 -4.257  -28.211 1.00 17.21 ? ? ? ? ? ? 304  ILE A CB  1 
ATOM   2409 C  CG1 . ILE A 1 306 ? -29.519 -4.289  -27.363 1.00 17.01 ? ? ? ? ? ? 304  ILE A CG1 1 
ATOM   2410 C  CG2 . ILE A 1 306 ? -27.562 -2.885  -28.092 1.00 16.86 ? ? ? ? ? ? 304  ILE A CG2 1 
ATOM   2411 C  CD1 . ILE A 1 306 ? -29.263 -4.155  -25.880 1.00 19.46 ? ? ? ? ? ? 304  ILE A CD1 1 
ATOM   2412 N  N   . HIS A 1 307 ? -27.454 -3.719  -31.663 1.00 15.09 ? ? ? ? ? ? 305  HIS A N   1 
ATOM   2413 C  CA  . HIS A 1 307 ? -26.283 -3.381  -32.460 1.00 14.14 ? ? ? ? ? ? 305  HIS A CA  1 
ATOM   2414 C  C   . HIS A 1 307 ? -25.478 -2.339  -31.699 1.00 13.67 ? ? ? ? ? ? 305  HIS A C   1 
ATOM   2415 O  O   . HIS A 1 307 ? -26.006 -1.268  -31.378 1.00 12.59 ? ? ? ? ? ? 305  HIS A O   1 
ATOM   2416 C  CB  . HIS A 1 307 ? -26.709 -2.848  -33.828 1.00 13.08 ? ? ? ? ? ? 305  HIS A CB  1 
ATOM   2417 C  CG  . HIS A 1 307 ? -25.558 -2.521  -34.725 1.00 16.31 ? ? ? ? ? ? 305  HIS A CG  1 
ATOM   2418 N  ND1 . HIS A 1 307 ? -24.902 -1.310  -34.684 1.00 12.54 ? ? ? ? ? ? 305  HIS A ND1 1 
ATOM   2419 C  CD2 . HIS A 1 307 ? -24.918 -3.266  -35.656 1.00 18.36 ? ? ? ? ? ? 305  HIS A CD2 1 
ATOM   2420 C  CE1 . HIS A 1 307 ? -23.922 -1.316  -35.572 1.00 19.88 ? ? ? ? ? ? 305  HIS A CE1 1 
ATOM   2421 N  NE2 . HIS A 1 307 ? -23.908 -2.494  -36.172 1.00 12.30 ? ? ? ? ? ? 305  HIS A NE2 1 
ATOM   2422 N  N   . TYR A 1 308 ? -24.208 -2.641  -31.401 1.00 10.88 ? ? ? ? ? ? 306  TYR A N   1 
ATOM   2423 C  CA  . TYR A 1 308 ? -23.501 -1.808  -30.435 1.00 9.74  ? ? ? ? ? ? 306  TYR A CA  1 
ATOM   2424 C  C   . TYR A 1 308 ? -23.232 -0.406  -30.989 1.00 12.47 ? ? ? ? ? ? 306  TYR A C   1 
ATOM   2425 O  O   . TYR A 1 308 ? -23.479 0.592   -30.306 1.00 14.24 ? ? ? ? ? ? 306  TYR A O   1 
ATOM   2426 C  CB  . TYR A 1 308 ? -22.194 -2.459  -29.964 1.00 11.17 ? ? ? ? ? ? 306  TYR A CB  1 
ATOM   2427 C  CG  . TYR A 1 308 ? -21.629 -1.564  -28.888 1.00 12.40 ? ? ? ? ? ? 306  TYR A CG  1 
ATOM   2428 C  CD1 . TYR A 1 308 ? -22.151 -1.581  -27.600 1.00 10.30 ? ? ? ? ? ? 306  TYR A CD1 1 
ATOM   2429 C  CD2 . TYR A 1 308 ? -20.664 -0.614  -29.188 1.00 12.30 ? ? ? ? ? ? 306  TYR A CD2 1 
ATOM   2430 C  CE1 . TYR A 1 308 ? -21.683 -0.696  -26.619 1.00 12.87 ? ? ? ? ? ? 306  TYR A CE1 1 
ATOM   2431 C  CE2 . TYR A 1 308 ? -20.193 0.260   -28.223 1.00 11.79 ? ? ? ? ? ? 306  TYR A CE2 1 
ATOM   2432 C  CZ  . TYR A 1 308 ? -20.708 0.221   -26.952 1.00 11.00 ? ? ? ? ? ? 306  TYR A CZ  1 
ATOM   2433 O  OH  . TYR A 1 308 ? -20.222 1.101   -26.011 1.00 12.78 ? ? ? ? ? ? 306  TYR A OH  1 
ATOM   2434 N  N   . GLY A 1 309 ? -22.724 -0.306  -32.223 1.00 10.78 ? ? ? ? ? ? 307  GLY A N   1 
ATOM   2435 C  CA  . GLY A 1 309 ? -22.420 1.008   -32.775 1.00 11.17 ? ? ? ? ? ? 307  GLY A CA  1 
ATOM   2436 C  C   . GLY A 1 309 ? -23.627 1.925   -32.803 1.00 11.93 ? ? ? ? ? ? 307  GLY A C   1 
ATOM   2437 O  O   . GLY A 1 309 ? -23.532 3.110   -32.477 1.00 12.84 ? ? ? ? ? ? 307  GLY A O   1 
ATOM   2438 N  N   . GLU A 1 310 ? -24.780 1.386   -33.194 1.00 13.70 ? ? ? ? ? ? 308  GLU A N   1 
ATOM   2439 C  CA  . GLU A 1 310 ? -26.018 2.154   -33.149 1.00 17.10 ? ? ? ? ? ? 308  GLU A CA  1 
ATOM   2440 C  C   . GLU A 1 310 ? -26.354 2.571   -31.722 1.00 14.49 ? ? ? ? ? ? 308  GLU A C   1 
ATOM   2441 O  O   . GLU A 1 310 ? -26.725 3.727   -31.471 1.00 13.56 ? ? ? ? ? ? 308  GLU A O   1 
ATOM   2442 C  CB  . GLU A 1 310 ? -27.139 1.311   -33.750 1.00 16.58 ? ? ? ? ? ? 308  GLU A CB  1 
ATOM   2443 C  CG  . GLU A 1 310 ? -28.514 1.919   -33.723 1.00 19.86 ? ? ? ? ? ? 308  GLU A CG  1 
ATOM   2444 C  CD  . GLU A 1 310 ? -29.526 0.977   -34.361 1.00 25.41 ? ? ? ? ? ? 308  GLU A CD  1 
ATOM   2445 O  OE1 . GLU A 1 310 ? -29.645 -0.178  -33.893 1.00 25.40 ? ? ? ? ? ? 308  GLU A OE1 1 
ATOM   2446 O  OE2 . GLU A 1 310 ? -30.178 1.379   -35.345 1.00 32.13 ? ? ? ? ? ? 308  GLU A OE2 1 
ATOM   2447 N  N   . HIS A 1 311 ? -26.203 1.640   -30.777 1.00 13.26 ? ? ? ? ? ? 309  HIS A N   1 
ATOM   2448 C  CA  . HIS A 1 311 ? -26.477 1.897   -29.364 1.00 14.53 ? ? ? ? ? ? 309  HIS A CA  1 
ATOM   2449 C  C   . HIS A 1 311 ? -25.601 3.026   -28.827 1.00 15.60 ? ? ? ? ? ? 309  HIS A C   1 
ATOM   2450 O  O   . HIS A 1 311 ? -26.098 4.000   -28.243 1.00 13.34 ? ? ? ? ? ? 309  HIS A O   1 
ATOM   2451 C  CB  . HIS A 1 311 ? -26.237 0.597   -28.597 1.00 14.97 ? ? ? ? ? ? 309  HIS A CB  1 
ATOM   2452 C  CG  . HIS A 1 311 ? -26.631 0.620   -27.153 1.00 16.72 ? ? ? ? ? ? 309  HIS A CG  1 
ATOM   2453 N  ND1 . HIS A 1 311 ? -27.940 0.736   -26.735 1.00 22.71 ? ? ? ? ? ? 309  HIS A ND1 1 
ATOM   2454 C  CD2 . HIS A 1 311 ? -25.894 0.435   -26.031 1.00 16.90 ? ? ? ? ? ? 309  HIS A CD2 1 
ATOM   2455 C  CE1 . HIS A 1 311 ? -27.986 0.668   -25.416 1.00 22.23 ? ? ? ? ? ? 309  HIS A CE1 1 
ATOM   2456 N  NE2 . HIS A 1 311 ? -26.758 0.479   -24.964 1.00 21.84 ? ? ? ? ? ? 309  HIS A NE2 1 
ATOM   2457 N  N   . PHE A 1 312 ? -24.285 2.899   -29.004 1.00 12.49 ? ? ? ? ? ? 310  PHE A N   1 
ATOM   2458 C  CA  . PHE A 1 312 ? -23.367 3.946   -28.571 1.00 11.63 ? ? ? ? ? ? 310  PHE A CA  1 
ATOM   2459 C  C   . PHE A 1 312 ? -23.684 5.273   -29.252 1.00 13.34 ? ? ? ? ? ? 310  PHE A C   1 
ATOM   2460 O  O   . PHE A 1 312 ? -23.794 6.311   -28.587 1.00 13.60 ? ? ? ? ? ? 310  PHE A O   1 
ATOM   2461 C  CB  . PHE A 1 312 ? -21.923 3.514   -28.852 1.00 9.60  ? ? ? ? ? ? 310  PHE A CB  1 
ATOM   2462 C  CG  . PHE A 1 312 ? -20.886 4.526   -28.442 1.00 13.95 ? ? ? ? ? ? 310  PHE A CG  1 
ATOM   2463 C  CD1 . PHE A 1 312 ? -20.553 5.586   -29.288 1.00 10.99 ? ? ? ? ? ? 310  PHE A CD1 1 
ATOM   2464 C  CD2 . PHE A 1 312 ? -20.232 4.414   -27.225 1.00 10.52 ? ? ? ? ? ? 310  PHE A CD2 1 
ATOM   2465 C  CE1 . PHE A 1 312 ? -19.601 6.522   -28.912 1.00 11.61 ? ? ? ? ? ? 310  PHE A CE1 1 
ATOM   2466 C  CE2 . PHE A 1 312 ? -19.276 5.336   -26.847 1.00 13.65 ? ? ? ? ? ? 310  PHE A CE2 1 
ATOM   2467 C  CZ  . PHE A 1 312 ? -18.967 6.407   -27.695 1.00 13.28 ? ? ? ? ? ? 310  PHE A CZ  1 
ATOM   2468 N  N   . THR A 1 313 ? -23.833 5.265   -30.583 1.00 9.79  ? ? ? ? ? ? 311  THR A N   1 
ATOM   2469 C  CA  . THR A 1 313 ? -23.991 6.536   -31.285 1.00 13.54 ? ? ? ? ? ? 311  THR A CA  1 
ATOM   2470 C  C   . THR A 1 313 ? -25.268 7.247   -30.851 1.00 14.57 ? ? ? ? ? ? 311  THR A C   1 
ATOM   2471 O  O   . THR A 1 313 ? -25.258 8.459   -30.620 1.00 13.43 ? ? ? ? ? ? 311  THR A O   1 
ATOM   2472 C  CB  . THR A 1 313 ? -23.977 6.337   -32.806 1.00 12.57 ? ? ? ? ? ? 311  THR A CB  1 
ATOM   2473 O  OG1 . THR A 1 313 ? -22.787 5.633   -33.181 1.00 14.18 ? ? ? ? ? ? 311  THR A OG1 1 
ATOM   2474 C  CG2 . THR A 1 313 ? -23.975 7.707   -33.516 1.00 11.44 ? ? ? ? ? ? 311  THR A CG2 1 
ATOM   2475 N  N   . ASN A 1 314 ? -26.375 6.506   -30.723 1.00 15.35 ? ? ? ? ? ? 312  ASN A N   1 
ATOM   2476 C  CA  . ASN A 1 314 ? -27.623 7.123   -30.283 1.00 20.29 ? ? ? ? ? ? 312  ASN A CA  1 
ATOM   2477 C  C   . ASN A 1 314 ? -27.485 7.684   -28.872 1.00 17.49 ? ? ? ? ? ? 312  ASN A C   1 
ATOM   2478 O  O   . ASN A 1 314 ? -27.953 8.794   -28.585 1.00 21.14 ? ? ? ? ? ? 312  ASN A O   1 
ATOM   2479 C  CB  . ASN A 1 314 ? -28.766 6.107   -30.354 1.00 20.44 ? ? ? ? ? ? 312  ASN A CB  1 
ATOM   2480 C  CG  . ASN A 1 314 ? -29.271 5.885   -31.778 1.00 30.63 ? ? ? ? ? ? 312  ASN A CG  1 
ATOM   2481 O  OD1 . ASN A 1 314 ? -29.011 6.688   -32.673 1.00 32.15 ? ? ? ? ? ? 312  ASN A OD1 1 
ATOM   2482 N  ND2 . ASN A 1 314 ? -30.000 4.791   -31.987 1.00 28.37 ? ? ? ? ? ? 312  ASN A ND2 1 
ATOM   2483 N  N   . MET A 1 315 ? -26.811 6.943   -27.988 1.00 16.66 ? ? ? ? ? ? 313  MET A N   1 
ATOM   2484 C  CA  . MET A 1 315 ? -26.636 7.388   -26.609 1.00 19.32 ? ? ? ? ? ? 313  MET A CA  1 
ATOM   2485 C  C   . MET A 1 315 ? -25.862 8.700   -26.544 1.00 19.65 ? ? ? ? ? ? 313  MET A C   1 
ATOM   2486 O  O   . MET A 1 315 ? -26.249 9.625   -25.821 1.00 20.23 ? ? ? ? ? ? 313  MET A O   1 
ATOM   2487 C  CB  . MET A 1 315 ? -25.924 6.299   -25.805 1.00 19.78 ? ? ? ? ? ? 313  MET A CB  1 
ATOM   2488 C  CG  . MET A 1 315 ? -25.562 6.688   -24.372 1.00 34.81 ? ? ? ? ? ? 313  MET A CG  1 
ATOM   2489 S  SD  . MET A 1 315 ? -26.992 6.703   -23.262 1.00 45.74 ? ? ? ? ? ? 313  MET A SD  1 
ATOM   2490 C  CE  . MET A 1 315 ? -27.789 5.171   -23.762 1.00 44.57 ? ? ? ? ? ? 313  MET A CE  1 
ATOM   2491 N  N   . PHE A 1 316 ? -24.775 8.808   -27.304 1.00 14.63 ? ? ? ? ? ? 314  PHE A N   1 
ATOM   2492 C  CA  . PHE A 1 316 ? -23.936 9.994   -27.189 1.00 17.55 ? ? ? ? ? ? 314  PHE A CA  1 
ATOM   2493 C  C   . PHE A 1 316 ? -24.527 11.195  -27.914 1.00 18.92 ? ? ? ? ? ? 314  PHE A C   1 
ATOM   2494 O  O   . PHE A 1 316 ? -24.345 12.330  -27.460 1.00 17.33 ? ? ? ? ? ? 314  PHE A O   1 
ATOM   2495 C  CB  . PHE A 1 316 ? -22.526 9.688   -27.684 1.00 10.71 ? ? ? ? ? ? 314  PHE A CB  1 
ATOM   2496 C  CG  . PHE A 1 316 ? -21.657 9.079   -26.618 1.00 18.85 ? ? ? ? ? ? 314  PHE A CG  1 
ATOM   2497 C  CD1 . PHE A 1 316 ? -21.956 7.822   -26.107 1.00 13.27 ? ? ? ? ? ? 314  PHE A CD1 1 
ATOM   2498 C  CD2 . PHE A 1 316 ? -20.577 9.779   -26.096 1.00 15.34 ? ? ? ? ? ? 314  PHE A CD2 1 
ATOM   2499 C  CE1 . PHE A 1 316 ? -21.187 7.269   -25.102 1.00 17.62 ? ? ? ? ? ? 314  PHE A CE1 1 
ATOM   2500 C  CE2 . PHE A 1 316 ? -19.794 9.223   -25.098 1.00 19.01 ? ? ? ? ? ? 314  PHE A CE2 1 
ATOM   2501 C  CZ  . PHE A 1 316 ? -20.097 7.971   -24.601 1.00 18.45 ? ? ? ? ? ? 314  PHE A CZ  1 
ATOM   2502 N  N   . MET A 1 317 ? -25.255 10.980  -29.012 1.00 16.09 ? ? ? ? ? ? 315  MET A N   1 
ATOM   2503 C  CA  . MET A 1 317 ? -25.963 12.097  -29.621 1.00 20.06 ? ? ? ? ? ? 315  MET A CA  1 
ATOM   2504 C  C   . MET A 1 317 ? -27.007 12.668  -28.666 1.00 24.17 ? ? ? ? ? ? 315  MET A C   1 
ATOM   2505 O  O   . MET A 1 317 ? -27.206 13.885  -28.616 1.00 19.42 ? ? ? ? ? ? 315  MET A O   1 
ATOM   2506 C  CB  . MET A 1 317 ? -26.607 11.665  -30.939 1.00 17.04 ? ? ? ? ? ? 315  MET A CB  1 
ATOM   2507 C  CG  . MET A 1 317 ? -25.594 11.356  -32.034 1.00 16.25 ? ? ? ? ? ? 315  MET A CG  1 
ATOM   2508 S  SD  . MET A 1 317 ? -26.378 10.857  -33.573 1.00 19.46 ? ? ? ? ? ? 315  MET A SD  1 
ATOM   2509 C  CE  . MET A 1 317 ? -26.928 12.429  -34.225 1.00 20.37 ? ? ? ? ? ? 315  MET A CE  1 
ATOM   2510 N  N   . ARG A 1 318 ? -27.678 11.805  -27.893 1.00 18.44 ? ? ? ? ? ? 316  ARG A N   1 
ATOM   2511 C  CA  . ARG A 1 318 ? -28.694 12.277  -26.957 1.00 23.76 ? ? ? ? ? ? 316  ARG A CA  1 
ATOM   2512 C  C   . ARG A 1 318 ? -28.082 12.873  -25.692 1.00 24.22 ? ? ? ? ? ? 316  ARG A C   1 
ATOM   2513 O  O   . ARG A 1 318 ? -28.645 13.813  -25.120 1.00 26.67 ? ? ? ? ? ? 316  ARG A O   1 
ATOM   2514 C  CB  . ARG A 1 318 ? -29.647 11.138  -26.584 1.00 24.11 ? ? ? ? ? ? 316  ARG A CB  1 
ATOM   2515 C  CG  . ARG A 1 318 ? -30.539 10.658  -27.723 1.00 26.12 ? ? ? ? ? ? 316  ARG A CG  1 
ATOM   2516 N  N   . CYS A 1 319 ? -26.934 12.358  -25.246 1.00 21.36 ? ? ? ? ? ? 317  CYS A N   1 
ATOM   2517 C  CA  A CYS A 1 319 ? -26.305 12.888  -24.042 0.61 22.88 ? ? ? ? ? ? 317  CYS A CA  1 
ATOM   2518 C  CA  B CYS A 1 319 ? -26.303 12.888  -24.044 0.39 22.87 ? ? ? ? ? ? 317  CYS A CA  1 
ATOM   2519 C  C   . CYS A 1 319 ? -25.603 14.219  -24.296 1.00 25.93 ? ? ? ? ? ? 317  CYS A C   1 
ATOM   2520 O  O   . CYS A 1 319 ? -25.543 15.062  -23.394 1.00 25.65 ? ? ? ? ? ? 317  CYS A O   1 
ATOM   2521 C  CB  A CYS A 1 319 ? -25.312 11.871  -23.473 0.61 23.55 ? ? ? ? ? ? 317  CYS A CB  1 
ATOM   2522 C  CB  B CYS A 1 319 ? -25.307 11.873  -23.486 0.39 23.54 ? ? ? ? ? ? 317  CYS A CB  1 
ATOM   2523 S  SG  A CYS A 1 319 ? -26.070 10.435  -22.661 0.61 27.09 ? ? ? ? ? ? 317  CYS A SG  1 
ATOM   2524 S  SG  B CYS A 1 319 ? -24.516 12.390  -21.952 0.39 22.70 ? ? ? ? ? ? 317  CYS A SG  1 
ATOM   2525 N  N   . TYR A 1 320 ? -25.068 14.433  -25.498 1.00 19.88 ? ? ? ? ? ? 318  TYR A N   1 
ATOM   2526 C  CA  . TYR A 1 320 ? -24.365 15.671  -25.840 1.00 20.98 ? ? ? ? ? ? 318  TYR A CA  1 
ATOM   2527 C  C   . TYR A 1 320 ? -24.935 16.238  -27.134 1.00 18.54 ? ? ? ? ? ? 318  TYR A C   1 
ATOM   2528 O  O   . TYR A 1 320 ? -24.248 16.303  -28.163 1.00 25.31 ? ? ? ? ? ? 318  TYR A O   1 
ATOM   2529 C  CB  . TYR A 1 320 ? -22.861 15.425  -25.950 1.00 20.11 ? ? ? ? ? ? 318  TYR A CB  1 
ATOM   2530 C  CG  . TYR A 1 320 ? -22.284 14.605  -24.804 1.00 22.22 ? ? ? ? ? ? 318  TYR A CG  1 
ATOM   2531 C  CD1 . TYR A 1 320 ? -22.030 15.181  -23.569 1.00 16.56 ? ? ? ? ? ? 318  TYR A CD1 1 
ATOM   2532 C  CD2 . TYR A 1 320 ? -21.992 13.256  -24.966 1.00 16.13 ? ? ? ? ? ? 318  TYR A CD2 1 
ATOM   2533 C  CE1 . TYR A 1 320 ? -21.499 14.434  -22.522 1.00 17.26 ? ? ? ? ? ? 318  TYR A CE1 1 
ATOM   2534 C  CE2 . TYR A 1 320 ? -21.467 12.507  -23.930 1.00 19.23 ? ? ? ? ? ? 318  TYR A CE2 1 
ATOM   2535 C  CZ  . TYR A 1 320 ? -21.212 13.105  -22.713 1.00 20.45 ? ? ? ? ? ? 318  TYR A CZ  1 
ATOM   2536 O  OH  . TYR A 1 320 ? -20.682 12.352  -21.691 1.00 20.35 ? ? ? ? ? ? 318  TYR A OH  1 
ATOM   2537 N  N   . PRO A 1 321 ? -26.196 16.678  -27.111 1.00 24.75 ? ? ? ? ? ? 319  PRO A N   1 
ATOM   2538 C  CA  . PRO A 1 321 ? -26.865 17.053  -28.369 1.00 22.58 ? ? ? ? ? ? 319  PRO A CA  1 
ATOM   2539 C  C   . PRO A 1 321 ? -26.247 18.243  -29.082 1.00 30.12 ? ? ? ? ? ? 319  PRO A C   1 
ATOM   2540 O  O   . PRO A 1 321 ? -26.414 18.363  -30.301 1.00 30.04 ? ? ? ? ? ? 319  PRO A O   1 
ATOM   2541 C  CB  . PRO A 1 321 ? -28.303 17.354  -27.921 1.00 28.05 ? ? ? ? ? ? 319  PRO A CB  1 
ATOM   2542 C  CG  . PRO A 1 321 ? -28.172 17.720  -26.483 1.00 28.64 ? ? ? ? ? ? 319  PRO A CG  1 
ATOM   2543 C  CD  . PRO A 1 321 ? -27.074 16.857  -25.942 1.00 29.43 ? ? ? ? ? ? 319  PRO A CD  1 
ATOM   2544 N  N   . ASP A 1 322 ? -25.543 19.127  -28.378 1.00 25.62 ? ? ? ? ? ? 320  ASP A N   1 
ATOM   2545 C  CA  . ASP A 1 322 ? -25.000 20.323  -29.004 1.00 25.64 ? ? ? ? ? ? 320  ASP A CA  1 
ATOM   2546 C  C   . ASP A 1 322 ? -23.495 20.260  -29.225 1.00 25.45 ? ? ? ? ? ? 320  ASP A C   1 
ATOM   2547 O  O   . ASP A 1 322 ? -22.917 21.235  -29.719 1.00 21.74 ? ? ? ? ? ? 320  ASP A O   1 
ATOM   2548 C  CB  . ASP A 1 322 ? -25.357 21.556  -28.169 1.00 35.86 ? ? ? ? ? ? 320  ASP A CB  1 
ATOM   2549 C  CG  . ASP A 1 322 ? -26.851 21.809  -28.129 1.00 47.62 ? ? ? ? ? ? 320  ASP A CG  1 
ATOM   2550 O  OD1 . ASP A 1 322 ? -27.416 21.876  -27.019 1.00 55.34 ? ? ? ? ? ? 320  ASP A OD1 1 
ATOM   2551 O  OD2 . ASP A 1 322 ? -27.463 21.925  -29.214 1.00 55.83 ? ? ? ? ? ? 320  ASP A OD2 1 
ATOM   2552 N  N   . ARG A 1 323 ? -22.851 19.144  -28.877 1.00 19.70 ? ? ? ? ? ? 321  ARG A N   1 
ATOM   2553 C  CA  . ARG A 1 323 ? -21.427 18.980  -29.139 1.00 18.47 ? ? ? ? ? ? 321  ARG A CA  1 
ATOM   2554 C  C   . ARG A 1 323 ? -21.167 19.064  -30.641 1.00 15.27 ? ? ? ? ? ? 321  ARG A C   1 
ATOM   2555 O  O   . ARG A 1 323 ? -22.007 18.687  -31.463 1.00 17.25 ? ? ? ? ? ? 321  ARG A O   1 
ATOM   2556 C  CB  . ARG A 1 323 ? -20.936 17.638  -28.568 1.00 19.60 ? ? ? ? ? ? 321  ARG A CB  1 
ATOM   2557 C  CG  . ARG A 1 323 ? -19.420 17.525  -28.288 1.00 19.63 ? ? ? ? ? ? 321  ARG A CG  1 
ATOM   2558 C  CD  . ARG A 1 323 ? -19.073 16.162  -27.637 1.00 17.37 ? ? ? ? ? ? 321  ARG A CD  1 
ATOM   2559 N  NE  . ARG A 1 323 ? -17.656 16.010  -27.272 1.00 14.01 ? ? ? ? ? ? 321  ARG A NE  1 
ATOM   2560 C  CZ  . ARG A 1 323 ? -17.100 16.478  -26.149 1.00 20.01 ? ? ? ? ? ? 321  ARG A CZ  1 
ATOM   2561 N  NH1 . ARG A 1 323 ? -17.827 17.134  -25.252 1.00 18.71 ? ? ? ? ? ? 321  ARG A NH1 1 
ATOM   2562 N  NH2 . ARG A 1 323 ? -15.807 16.290  -25.912 1.00 17.02 ? ? ? ? ? ? 321  ARG A NH2 1 
ATOM   2563 N  N   . ILE A 1 324 ? -19.996 19.586  -31.002 1.00 15.83 ? ? ? ? ? ? 322  ILE A N   1 
ATOM   2564 C  CA  . ILE A 1 324 ? -19.650 19.668  -32.419 1.00 14.55 ? ? ? ? ? ? 322  ILE A CA  1 
ATOM   2565 C  C   . ILE A 1 324 ? -19.659 18.279  -33.056 1.00 19.01 ? ? ? ? ? ? 322  ILE A C   1 
ATOM   2566 O  O   . ILE A 1 324 ? -19.927 18.141  -34.258 1.00 15.47 ? ? ? ? ? ? 322  ILE A O   1 
ATOM   2567 C  CB  . ILE A 1 324 ? -18.290 20.365  -32.607 1.00 13.20 ? ? ? ? ? ? 322  ILE A CB  1 
ATOM   2568 C  CG1 . ILE A 1 324 ? -17.216 19.664  -31.778 1.00 16.85 ? ? ? ? ? ? 322  ILE A CG1 1 
ATOM   2569 C  CG2 . ILE A 1 324 ? -18.391 21.837  -32.206 1.00 22.68 ? ? ? ? ? ? 322  ILE A CG2 1 
ATOM   2570 C  CD1 . ILE A 1 324 ? -15.834 20.291  -31.890 1.00 22.24 ? ? ? ? ? ? 322  ILE A CD1 1 
ATOM   2571 N  N   . THR A 1 325 ? -19.381 17.234  -32.264 1.00 17.31 ? ? ? ? ? ? 323  THR A N   1 
ATOM   2572 C  CA  . THR A 1 325 ? -19.422 15.867  -32.782 1.00 15.95 ? ? ? ? ? ? 323  THR A CA  1 
ATOM   2573 C  C   . THR A 1 325 ? -20.815 15.523  -33.287 1.00 15.51 ? ? ? ? ? ? 323  THR A C   1 
ATOM   2574 O  O   . THR A 1 325 ? -20.980 14.998  -34.395 1.00 13.36 ? ? ? ? ? ? 323  THR A O   1 
ATOM   2575 C  CB  . THR A 1 325 ? -18.992 14.875  -31.698 1.00 16.36 ? ? ? ? ? ? 323  THR A CB  1 
ATOM   2576 O  OG1 . THR A 1 325 ? -17.963 15.454  -30.886 1.00 16.88 ? ? ? ? ? ? 323  THR A OG1 1 
ATOM   2577 C  CG2 . THR A 1 325 ? -18.475 13.581  -32.324 1.00 15.26 ? ? ? ? ? ? 323  THR A CG2 1 
ATOM   2578 N  N   . THR A 1 326 ? -21.836 15.836  -32.490 1.00 13.80 ? ? ? ? ? ? 324  THR A N   1 
ATOM   2579 C  CA  . THR A 1 326 ? -23.207 15.565  -32.907 1.00 16.22 ? ? ? ? ? ? 324  THR A CA  1 
ATOM   2580 C  C   . THR A 1 326 ? -23.582 16.396  -34.128 1.00 18.04 ? ? ? ? ? ? 324  THR A C   1 
ATOM   2581 O  O   . THR A 1 326 ? -24.243 15.904  -35.050 1.00 19.11 ? ? ? ? ? ? 324  THR A O   1 
ATOM   2582 C  CB  . THR A 1 326 ? -24.160 15.855  -31.751 1.00 18.21 ? ? ? ? ? ? 324  THR A CB  1 
ATOM   2583 O  OG1 . THR A 1 326 ? -23.787 15.063  -30.620 1.00 14.84 ? ? ? ? ? ? 324  THR A OG1 1 
ATOM   2584 C  CG2 . THR A 1 326 ? -25.590 15.539  -32.146 1.00 20.42 ? ? ? ? ? ? 324  THR A CG2 1 
ATOM   2585 N  N   . GLN A 1 327 ? -23.163 17.663  -34.153 1.00 18.66 ? ? ? ? ? ? 325  GLN A N   1 
ATOM   2586 C  CA  . GLN A 1 327 ? -23.523 18.535  -35.268 1.00 19.64 ? ? ? ? ? ? 325  GLN A CA  1 
ATOM   2587 C  C   . GLN A 1 327 ? -22.960 18.019  -36.586 1.00 20.27 ? ? ? ? ? ? 325  GLN A C   1 
ATOM   2588 O  O   . GLN A 1 327 ? -23.629 18.090  -37.624 1.00 19.92 ? ? ? ? ? ? 325  GLN A O   1 
ATOM   2589 C  CB  . GLN A 1 327 ? -23.030 19.958  -34.997 1.00 19.08 ? ? ? ? ? ? 325  GLN A CB  1 
ATOM   2590 C  CG  . GLN A 1 327 ? -23.562 20.548  -33.706 1.00 26.95 ? ? ? ? ? ? 325  GLN A CG  1 
ATOM   2591 C  CD  . GLN A 1 327 ? -23.099 21.977  -33.503 1.00 33.68 ? ? ? ? ? ? 325  GLN A CD  1 
ATOM   2592 O  OE1 . GLN A 1 327 ? -23.099 22.775  -34.439 1.00 32.97 ? ? ? ? ? ? 325  GLN A OE1 1 
ATOM   2593 N  NE2 . GLN A 1 327 ? -22.690 22.302  -32.283 1.00 31.72 ? ? ? ? ? ? 325  GLN A NE2 1 
ATOM   2594 N  N   . ARG A 1 328 ? -21.729 17.502  -36.569 1.00 15.22 ? ? ? ? ? ? 326  ARG A N   1 
ATOM   2595 C  CA  . ARG A 1 328 ? -21.121 17.006  -37.800 1.00 13.91 ? ? ? ? ? ? 326  ARG A CA  1 
ATOM   2596 C  C   . ARG A 1 328 ? -21.709 15.665  -38.233 1.00 15.63 ? ? ? ? ? ? 326  ARG A C   1 
ATOM   2597 O  O   . ARG A 1 328 ? -21.747 15.376  -39.437 1.00 16.45 ? ? ? ? ? ? 326  ARG A O   1 
ATOM   2598 C  CB  . ARG A 1 328 ? -19.602 16.893  -37.638 1.00 17.00 ? ? ? ? ? ? 326  ARG A CB  1 
ATOM   2599 C  CG  . ARG A 1 328 ? -18.892 16.333  -38.869 1.00 16.87 ? ? ? ? ? ? 326  ARG A CG  1 
ATOM   2600 C  CD  . ARG A 1 328 ? -17.403 16.619  -38.876 1.00 15.86 ? ? ? ? ? ? 326  ARG A CD  1 
ATOM   2601 N  NE  . ARG A 1 328 ? -16.796 16.183  -40.131 1.00 20.35 ? ? ? ? ? ? 326  ARG A NE  1 
ATOM   2602 C  CZ  . ARG A 1 328 ? -15.538 16.416  -40.491 1.00 17.52 ? ? ? ? ? ? 326  ARG A CZ  1 
ATOM   2603 N  NH1 . ARG A 1 328 ? -14.720 17.085  -39.693 1.00 18.03 ? ? ? ? ? ? 326  ARG A NH1 1 
ATOM   2604 N  NH2 . ARG A 1 328 ? -15.092 15.966  -41.656 1.00 19.86 ? ? ? ? ? ? 326  ARG A NH2 1 
ATOM   2605 N  N   . ILE A 1 329 ? -22.154 14.831  -37.286 1.00 13.82 ? ? ? ? ? ? 327  ILE A N   1 
ATOM   2606 C  CA  . ILE A 1 329 ? -22.892 13.625  -37.658 1.00 14.68 ? ? ? ? ? ? 327  ILE A CA  1 
ATOM   2607 C  C   . ILE A 1 329 ? -24.136 14.004  -38.450 1.00 20.30 ? ? ? ? ? ? 327  ILE A C   1 
ATOM   2608 O  O   . ILE A 1 329 ? -24.400 13.463  -39.530 1.00 17.93 ? ? ? ? ? ? 327  ILE A O   1 
ATOM   2609 C  CB  . ILE A 1 329 ? -23.252 12.797  -36.408 1.00 16.00 ? ? ? ? ? ? 327  ILE A CB  1 
ATOM   2610 C  CG1 . ILE A 1 329 ? -22.011 12.086  -35.861 1.00 12.60 ? ? ? ? ? ? 327  ILE A CG1 1 
ATOM   2611 C  CG2 . ILE A 1 329 ? -24.365 11.790  -36.722 1.00 11.93 ? ? ? ? ? ? 327  ILE A CG2 1 
ATOM   2612 C  CD1 . ILE A 1 329 ? -22.238 11.357  -34.551 1.00 13.39 ? ? ? ? ? ? 327  ILE A CD1 1 
ATOM   2613 N  N   . ASN A 1 330 ? -24.898 14.973  -37.934 1.00 16.59 ? ? ? ? ? ? 328  ASN A N   1 
ATOM   2614 C  CA  . ASN A 1 330 ? -26.120 15.411  -38.597 1.00 22.50 ? ? ? ? ? ? 328  ASN A CA  1 
ATOM   2615 C  C   . ASN A 1 330 ? -25.830 16.072  -39.938 1.00 19.54 ? ? ? ? ? ? 328  ASN A C   1 
ATOM   2616 O  O   . ASN A 1 330 ? -26.523 15.807  -40.925 1.00 24.00 ? ? ? ? ? ? 328  ASN A O   1 
ATOM   2617 C  CB  . ASN A 1 330 ? -26.883 16.359  -37.676 1.00 23.95 ? ? ? ? ? ? 328  ASN A CB  1 
ATOM   2618 C  CG  . ASN A 1 330 ? -27.505 15.639  -36.515 1.00 25.27 ? ? ? ? ? ? 328  ASN A CG  1 
ATOM   2619 O  OD1 . ASN A 1 330 ? -27.900 14.479  -36.646 1.00 26.87 ? ? ? ? ? ? 328  ASN A OD1 1 
ATOM   2620 N  ND2 . ASN A 1 330 ? -27.596 16.308  -35.367 1.00 21.86 ? ? ? ? ? ? 328  ASN A ND2 1 
ATOM   2621 N  N   . LYS A 1 331 ? -24.804 16.924  -39.994 1.00 17.52 ? ? ? ? ? ? 329  LYS A N   1 
ATOM   2622 C  CA  . LYS A 1 331 ? -24.494 17.650  -41.222 1.00 19.37 ? ? ? ? ? ? 329  LYS A CA  1 
ATOM   2623 C  C   . LYS A 1 331 ? -24.061 16.711  -42.343 1.00 30.16 ? ? ? ? ? ? 329  LYS A C   1 
ATOM   2624 O  O   . LYS A 1 331 ? -24.441 16.904  -43.506 1.00 22.08 ? ? ? ? ? ? 329  LYS A O   1 
ATOM   2625 C  CB  . LYS A 1 331 ? -23.407 18.691  -40.947 1.00 25.12 ? ? ? ? ? ? 329  LYS A CB  1 
ATOM   2626 C  CG  . LYS A 1 331 ? -22.919 19.427  -42.184 1.00 33.59 ? ? ? ? ? ? 329  LYS A CG  1 
ATOM   2627 C  CD  . LYS A 1 331 ? -21.669 20.253  -41.896 1.00 43.16 ? ? ? ? ? ? 329  LYS A CD  1 
ATOM   2628 C  CE  . LYS A 1 331 ? -21.584 21.485  -42.799 1.00 54.83 ? ? ? ? ? ? 329  LYS A CE  1 
ATOM   2629 N  NZ  . LYS A 1 331 ? -22.190 22.706  -42.181 1.00 52.68 ? ? ? ? ? ? 329  LYS A NZ  1 
ATOM   2630 N  N   . GLU A 1 332 ? -23.270 15.688  -42.020 1.00 21.92 ? ? ? ? ? ? 330  GLU A N   1 
ATOM   2631 C  CA  . GLU A 1 332 ? -22.715 14.794  -43.022 1.00 20.55 ? ? ? ? ? ? 330  GLU A CA  1 
ATOM   2632 C  C   . GLU A 1 332 ? -23.491 13.488  -43.153 1.00 18.10 ? ? ? ? ? ? 330  GLU A C   1 
ATOM   2633 O  O   . GLU A 1 332 ? -23.060 12.598  -43.891 1.00 19.39 ? ? ? ? ? ? 330  GLU A O   1 
ATOM   2634 C  CB  . GLU A 1 332 ? -21.247 14.509  -42.704 1.00 19.11 ? ? ? ? ? ? 330  GLU A CB  1 
ATOM   2635 C  CG  . GLU A 1 332 ? -20.389 15.762  -42.613 1.00 25.91 ? ? ? ? ? ? 330  GLU A CG  1 
ATOM   2636 C  CD  . GLU A 1 332 ? -18.913 15.450  -42.481 1.00 24.44 ? ? ? ? ? ? 330  GLU A CD  1 
ATOM   2637 O  OE1 . GLU A 1 332 ? -18.085 16.206  -43.021 1.00 26.00 ? ? ? ? ? ? 330  GLU A OE1 1 
ATOM   2638 O  OE2 . GLU A 1 332 ? -18.580 14.434  -41.841 1.00 25.02 ? ? ? ? ? ? 330  GLU A OE2 1 
ATOM   2639 N  N   . ASN A 1 333 ? -24.618 13.360  -42.459 1.00 16.72 ? ? ? ? ? ? 331  ASN A N   1 
ATOM   2640 C  CA  . ASN A 1 333 ? -25.451 12.161  -42.489 1.00 18.38 ? ? ? ? ? ? 331  ASN A CA  1 
ATOM   2641 C  C   . ASN A 1 333 ? -24.633 10.909  -42.171 1.00 19.91 ? ? ? ? ? ? 331  ASN A C   1 
ATOM   2642 O  O   . ASN A 1 333 ? -24.735 9.877   -42.837 1.00 18.02 ? ? ? ? ? ? 331  ASN A O   1 
ATOM   2643 C  CB  . ASN A 1 333 ? -26.165 12.022  -43.836 1.00 22.34 ? ? ? ? ? ? 331  ASN A CB  1 
ATOM   2644 C  CG  . ASN A 1 333 ? -27.280 11.004  -43.794 1.00 20.40 ? ? ? ? ? ? 331  ASN A CG  1 
ATOM   2645 O  OD1 . ASN A 1 333 ? -27.801 10.688  -42.728 1.00 27.97 ? ? ? ? ? ? 331  ASN A OD1 1 
ATOM   2646 N  ND2 . ASN A 1 333 ? -27.651 10.481  -44.953 1.00 19.92 ? ? ? ? ? ? 331  ASN A ND2 1 
ATOM   2647 N  N   . ARG A 1 334 ? -23.817 10.998  -41.121 1.00 18.91 ? ? ? ? ? ? 332  ARG A N   1 
ATOM   2648 C  CA  . ARG A 1 334 ? -22.966 9.865   -40.768 1.00 16.92 ? ? ? ? ? ? 332  ARG A CA  1 
ATOM   2649 C  C   . ARG A 1 334 ? -23.754 8.673   -40.236 1.00 15.87 ? ? ? ? ? ? 332  ARG A C   1 
ATOM   2650 O  O   . ARG A 1 334 ? -23.224 7.552   -40.221 1.00 12.55 ? ? ? ? ? ? 332  ARG A O   1 
ATOM   2651 C  CB  . ARG A 1 334 ? -21.918 10.302  -39.743 1.00 14.68 ? ? ? ? ? ? 332  ARG A CB  1 
ATOM   2652 C  CG  . ARG A 1 334 ? -21.065 11.461  -40.212 1.00 16.38 ? ? ? ? ? ? 332  ARG A CG  1 
ATOM   2653 C  CD  . ARG A 1 334 ? -19.868 11.727  -39.295 1.00 12.42 ? ? ? ? ? ? 332  ARG A CD  1 
ATOM   2654 N  NE  . ARG A 1 334 ? -18.797 12.322  -40.081 1.00 15.14 ? ? ? ? ? ? 332  ARG A NE  1 
ATOM   2655 C  CZ  . ARG A 1 334 ? -17.502 12.135  -39.870 1.00 18.95 ? ? ? ? ? ? 332  ARG A CZ  1 
ATOM   2656 N  NH1 . ARG A 1 334 ? -17.098 11.390  -38.848 1.00 13.36 ? ? ? ? ? ? 332  ARG A NH1 1 
ATOM   2657 N  NH2 . ARG A 1 334 ? -16.611 12.702  -40.686 1.00 15.58 ? ? ? ? ? ? 332  ARG A NH2 1 
ATOM   2658 N  N   . LEU A 1 335 ? -25.002 8.868   -39.802 1.00 14.11 ? ? ? ? ? ? 333  LEU A N   1 
ATOM   2659 C  CA  . LEU A 1 335 ? -25.771 7.718   -39.332 1.00 15.15 ? ? ? ? ? ? 333  LEU A CA  1 
ATOM   2660 C  C   . LEU A 1 335 ? -26.100 6.740   -40.457 1.00 18.26 ? ? ? ? ? ? 333  LEU A C   1 
ATOM   2661 O  O   . LEU A 1 335 ? -26.390 5.569   -40.175 1.00 15.61 ? ? ? ? ? ? 333  LEU A O   1 
ATOM   2662 C  CB  . LEU A 1 335 ? -27.064 8.162   -38.654 1.00 19.20 ? ? ? ? ? ? 333  LEU A CB  1 
ATOM   2663 C  CG  . LEU A 1 335 ? -26.929 9.039   -37.409 1.00 18.24 ? ? ? ? ? ? 333  LEU A CG  1 
ATOM   2664 C  CD1 . LEU A 1 335 ? -28.319 9.335   -36.838 1.00 22.74 ? ? ? ? ? ? 333  LEU A CD1 1 
ATOM   2665 C  CD2 . LEU A 1 335 ? -26.049 8.348   -36.374 1.00 17.27 ? ? ? ? ? ? 333  LEU A CD2 1 
ATOM   2666 N  N   . ALA A 1 336 ? -26.051 7.188   -41.718 1.00 16.15 ? ? ? ? ? ? 334  ALA A N   1 
ATOM   2667 C  CA  . ALA A 1 336 ? -26.330 6.290   -42.840 1.00 18.00 ? ? ? ? ? ? 334  ALA A CA  1 
ATOM   2668 C  C   . ALA A 1 336 ? -25.427 5.066   -42.821 1.00 17.29 ? ? ? ? ? ? 334  ALA A C   1 
ATOM   2669 O  O   . ALA A 1 336 ? -25.820 3.991   -43.297 1.00 16.89 ? ? ? ? ? ? 334  ALA A O   1 
ATOM   2670 C  CB  . ALA A 1 336 ? -26.172 7.034   -44.167 1.00 19.22 ? ? ? ? ? ? 334  ALA A CB  1 
ATOM   2671 N  N   . HIS A 1 337 ? -24.221 5.205   -42.268 1.00 14.65 ? ? ? ? ? ? 335  HIS A N   1 
ATOM   2672 C  CA  . HIS A 1 337 ? -23.298 4.075   -42.192 1.00 15.03 ? ? ? ? ? ? 335  HIS A CA  1 
ATOM   2673 C  C   . HIS A 1 337 ? -23.888 2.923   -41.396 1.00 18.31 ? ? ? ? ? ? 335  HIS A C   1 
ATOM   2674 O  O   . HIS A 1 337 ? -23.621 1.754   -41.703 1.00 18.06 ? ? ? ? ? ? 335  HIS A O   1 
ATOM   2675 C  CB  . HIS A 1 337 ? -21.980 4.505   -41.545 1.00 14.18 ? ? ? ? ? ? 335  HIS A CB  1 
ATOM   2676 C  CG  . HIS A 1 337 ? -21.028 5.187   -42.474 1.00 15.84 ? ? ? ? ? ? 335  HIS A CG  1 
ATOM   2677 N  ND1 . HIS A 1 337 ? -20.440 4.547   -43.546 1.00 14.41 ? ? ? ? ? ? 335  HIS A ND1 1 
ATOM   2678 C  CD2 . HIS A 1 337 ? -20.529 6.444   -42.467 1.00 12.37 ? ? ? ? ? ? 335  HIS A CD2 1 
ATOM   2679 C  CE1 . HIS A 1 337 ? -19.632 5.389   -44.168 1.00 12.59 ? ? ? ? ? ? 335  HIS A CE1 1 
ATOM   2680 N  NE2 . HIS A 1 337 ? -19.671 6.548   -43.534 1.00 13.44 ? ? ? ? ? ? 335  HIS A NE2 1 
ATOM   2681 N  N   . LEU A 1 338 ? -24.684 3.233   -40.368 1.00 19.01 ? ? ? ? ? ? 336  LEU A N   1 
ATOM   2682 C  CA  . LEU A 1 338 ? -25.144 2.199   -39.448 1.00 15.19 ? ? ? ? ? ? 336  LEU A CA  1 
ATOM   2683 C  C   . LEU A 1 338 ? -26.006 1.160   -40.155 1.00 16.26 ? ? ? ? ? ? 336  LEU A C   1 
ATOM   2684 O  O   . LEU A 1 338 ? -25.860 -0.047  -39.913 1.00 16.47 ? ? ? ? ? ? 336  LEU A O   1 
ATOM   2685 C  CB  . LEU A 1 338 ? -25.905 2.840   -38.282 1.00 16.62 ? ? ? ? ? ? 336  LEU A CB  1 
ATOM   2686 C  CG  . LEU A 1 338 ? -25.056 3.715   -37.352 1.00 17.68 ? ? ? ? ? ? 336  LEU A CG  1 
ATOM   2687 C  CD1 . LEU A 1 338 ? -25.946 4.536   -36.418 1.00 16.65 ? ? ? ? ? ? 336  LEU A CD1 1 
ATOM   2688 C  CD2 . LEU A 1 338 ? -24.074 2.871   -36.541 1.00 15.20 ? ? ? ? ? ? 336  LEU A CD2 1 
ATOM   2689 N  N   . GLU A 1 339 ? -26.907 1.602   -41.036 1.00 17.85 ? ? ? ? ? ? 337  GLU A N   1 
ATOM   2690 C  CA  . GLU A 1 339 ? -27.781 0.645   -41.712 1.00 22.83 ? ? ? ? ? ? 337  GLU A CA  1 
ATOM   2691 C  C   . GLU A 1 339 ? -26.986 -0.265  -42.642 1.00 15.56 ? ? ? ? ? ? 337  GLU A C   1 
ATOM   2692 O  O   . GLU A 1 339 ? -27.291 -1.458  -42.765 1.00 19.40 ? ? ? ? ? ? 337  GLU A O   1 
ATOM   2693 C  CB  . GLU A 1 339 ? -28.883 1.370   -42.490 1.00 30.63 ? ? ? ? ? ? 337  GLU A CB  1 
ATOM   2694 C  CG  . GLU A 1 339 ? -29.550 0.497   -43.568 1.00 38.71 ? ? ? ? ? ? 337  GLU A CG  1 
ATOM   2695 C  CD  . GLU A 1 339 ? -30.970 0.931   -43.922 1.00 40.80 ? ? ? ? ? ? 337  GLU A CD  1 
ATOM   2696 O  OE1 . GLU A 1 339 ? -31.830 0.042   -44.126 1.00 39.12 ? ? ? ? ? ? 337  GLU A OE1 1 
ATOM   2697 O  OE2 . GLU A 1 339 ? -31.222 2.154   -44.009 1.00 38.61 ? ? ? ? ? ? 337  GLU A OE2 1 
ATOM   2698 N  N   . ASP A 1 340 ? -25.965 0.282   -43.307 1.00 15.12 ? ? ? ? ? ? 338  ASP A N   1 
ATOM   2699 C  CA  . ASP A 1 340 ? -25.128 -0.552  -44.165 1.00 17.49 ? ? ? ? ? ? 338  ASP A CA  1 
ATOM   2700 C  C   . ASP A 1 340 ? -24.256 -1.493  -43.348 1.00 18.50 ? ? ? ? ? ? 338  ASP A C   1 
ATOM   2701 O  O   . ASP A 1 340 ? -23.988 -2.617  -43.786 1.00 15.96 ? ? ? ? ? ? 338  ASP A O   1 
ATOM   2702 C  CB  . ASP A 1 340 ? -24.251 0.310   -45.074 1.00 15.44 ? ? ? ? ? ? 338  ASP A CB  1 
ATOM   2703 C  CG  . ASP A 1 340 ? -25.038 0.957   -46.208 1.00 18.29 ? ? ? ? ? ? 338  ASP A CG  1 
ATOM   2704 O  OD1 . ASP A 1 340 ? -24.578 1.974   -46.740 1.00 20.22 ? ? ? ? ? ? 338  ASP A OD1 1 
ATOM   2705 O  OD2 . ASP A 1 340 ? -26.122 0.452   -46.550 1.00 28.66 ? ? ? ? ? ? 338  ASP A OD2 1 
ATOM   2706 N  N   . LEU A 1 341 ? -23.806 -1.058  -42.165 1.00 15.54 ? ? ? ? ? ? 339  LEU A N   1 
ATOM   2707 C  CA  . LEU A 1 341 ? -23.025 -1.943  -41.302 1.00 18.23 ? ? ? ? ? ? 339  LEU A CA  1 
ATOM   2708 C  C   . LEU A 1 341 ? -23.872 -3.106  -40.801 1.00 14.65 ? ? ? ? ? ? 339  LEU A C   1 
ATOM   2709 O  O   . LEU A 1 341 ? -23.415 -4.252  -40.780 1.00 18.15 ? ? ? ? ? ? 339  LEU A O   1 
ATOM   2710 C  CB  . LEU A 1 341 ? -22.440 -1.156  -40.123 1.00 14.99 ? ? ? ? ? ? 339  LEU A CB  1 
ATOM   2711 C  CG  . LEU A 1 341 ? -21.273 -0.239  -40.468 1.00 17.61 ? ? ? ? ? ? 339  LEU A CG  1 
ATOM   2712 C  CD1 . LEU A 1 341 ? -20.823 0.550   -39.241 1.00 18.23 ? ? ? ? ? ? 339  LEU A CD1 1 
ATOM   2713 C  CD2 . LEU A 1 341 ? -20.120 -1.044  -41.055 1.00 15.33 ? ? ? ? ? ? 339  LEU A CD2 1 
ATOM   2714 N  N   . LYS A 1 342 ? -25.117 -2.837  -40.412 1.00 16.85 ? ? ? ? ? ? 340  LYS A N   1 
ATOM   2715 C  CA  . LYS A 1 342 ? -25.998 -3.921  -39.986 1.00 20.54 ? ? ? ? ? ? 340  LYS A CA  1 
ATOM   2716 C  C   . LYS A 1 342 ? -26.197 -4.956  -41.089 1.00 21.73 ? ? ? ? ? ? 340  LYS A C   1 
ATOM   2717 O  O   . LYS A 1 342 ? -26.333 -6.151  -40.799 1.00 18.32 ? ? ? ? ? ? 340  LYS A O   1 
ATOM   2718 C  CB  . LYS A 1 342 ? -27.349 -3.357  -39.540 1.00 25.49 ? ? ? ? ? ? 340  LYS A CB  1 
ATOM   2719 C  CG  . LYS A 1 342 ? -27.396 -2.971  -38.068 1.00 33.09 ? ? ? ? ? ? 340  LYS A CG  1 
ATOM   2720 C  CD  . LYS A 1 342 ? -28.741 -2.374  -37.673 1.00 36.01 ? ? ? ? ? ? 340  LYS A CD  1 
ATOM   2721 C  CE  . LYS A 1 342 ? -28.970 -1.054  -38.382 1.00 39.66 ? ? ? ? ? ? 340  LYS A CE  1 
ATOM   2722 N  NZ  . LYS A 1 342 ? -29.460 0.012   -37.464 1.00 41.55 ? ? ? ? ? ? 340  LYS A NZ  1 
ATOM   2723 N  N   . LYS A 1 343 ? -26.208 -4.528  -42.354 1.00 16.01 ? ? ? ? ? ? 341  LYS A N   1 
ATOM   2724 C  CA  . LYS A 1 343 ? -26.454 -5.453  -43.454 1.00 18.26 ? ? ? ? ? ? 341  LYS A CA  1 
ATOM   2725 C  C   . LYS A 1 343 ? -25.182 -6.085  -44.007 1.00 20.12 ? ? ? ? ? ? 341  LYS A C   1 
ATOM   2726 O  O   . LYS A 1 343 ? -25.191 -7.270  -44.366 1.00 21.74 ? ? ? ? ? ? 341  LYS A O   1 
ATOM   2727 C  CB  . LYS A 1 343 ? -27.196 -4.736  -44.583 1.00 19.75 ? ? ? ? ? ? 341  LYS A CB  1 
ATOM   2728 C  CG  . LYS A 1 343 ? -28.597 -4.295  -44.232 1.00 30.24 ? ? ? ? ? ? 341  LYS A CG  1 
ATOM   2729 C  CD  . LYS A 1 343 ? -29.243 -3.574  -45.409 1.00 40.59 ? ? ? ? ? ? 341  LYS A CD  1 
ATOM   2730 C  CE  . LYS A 1 343 ? -30.752 -3.732  -45.386 1.00 48.31 ? ? ? ? ? ? 341  LYS A CE  1 
ATOM   2731 N  NZ  . LYS A 1 343 ? -31.132 -5.155  -45.144 1.00 54.53 ? ? ? ? ? ? 341  LYS A NZ  1 
ATOM   2732 N  N   . TYR A 1 344 ? -24.088 -5.329  -44.086 1.00 15.29 ? ? ? ? ? ? 342  TYR A N   1 
ATOM   2733 C  CA  . TYR A 1 344 ? -22.896 -5.747  -44.817 1.00 17.20 ? ? ? ? ? ? 342  TYR A CA  1 
ATOM   2734 C  C   . TYR A 1 344 ? -21.637 -5.606  -43.976 1.00 25.94 ? ? ? ? ? ? 342  TYR A C   1 
ATOM   2735 O  O   . TYR A 1 344 ? -20.593 -5.155  -44.457 1.00 33.00 ? ? ? ? ? ? 342  TYR A O   1 
ATOM   2736 C  CB  . TYR A 1 344 ? -22.770 -4.962  -46.122 1.00 17.97 ? ? ? ? ? ? 342  TYR A CB  1 
ATOM   2737 C  CG  . TYR A 1 344 ? -23.938 -5.237  -47.030 1.00 17.79 ? ? ? ? ? ? 342  TYR A CG  1 
ATOM   2738 C  CD1 . TYR A 1 344 ? -24.981 -4.324  -47.151 1.00 17.84 ? ? ? ? ? ? 342  TYR A CD1 1 
ATOM   2739 C  CD2 . TYR A 1 344 ? -24.022 -6.430  -47.736 1.00 14.00 ? ? ? ? ? ? 342  TYR A CD2 1 
ATOM   2740 C  CE1 . TYR A 1 344 ? -26.072 -4.587  -47.965 1.00 15.09 ? ? ? ? ? ? 342  TYR A CE1 1 
ATOM   2741 C  CE2 . TYR A 1 344 ? -25.106 -6.701  -48.552 1.00 13.90 ? ? ? ? ? ? 342  TYR A CE2 1 
ATOM   2742 C  CZ  . TYR A 1 344 ? -26.125 -5.777  -48.666 1.00 11.98 ? ? ? ? ? ? 342  TYR A CZ  1 
ATOM   2743 O  OH  . TYR A 1 344 ? -27.209 -6.047  -49.476 1.00 15.33 ? ? ? ? ? ? 342  TYR A OH  1 
ATOM   2744 N  N   . SER A 1 345 ? -21.709 -5.993  -42.708 1.00 26.12 ? ? ? ? ? ? 343  SER A N   1 
ATOM   2745 C  CA  . SER A 1 345 ? -20.499 -6.211  -41.925 1.00 23.17 ? ? ? ? ? ? 343  SER A CA  1 
ATOM   2746 C  C   . SER A 1 345 ? -20.073 -7.667  -42.083 1.00 21.28 ? ? ? ? ? ? 343  SER A C   1 
ATOM   2747 O  O   . SER A 1 345 ? -18.888 -7.981  -42.038 1.00 36.43 ? ? ? ? ? ? 343  SER A O   1 
ATOM   2748 C  CB  . SER A 1 345 ? -20.717 -5.879  -40.447 1.00 21.53 ? ? ? ? ? ? 343  SER A CB  1 
ATOM   2749 O  OG  . SER A 1 345 ? -20.736 -4.482  -40.239 1.00 26.94 ? ? ? ? ? ? 343  SER A OG  1 
ATOM   2750 N  N   . SER B 1 1   ? 20.688  -6.039  28.848  1.00 17.94 ? ? ? ? ? ? -1   SER B N   1 
ATOM   2751 C  CA  . SER B 1 1   ? 20.093  -5.386  30.008  1.00 18.72 ? ? ? ? ? ? -1   SER B CA  1 
ATOM   2752 C  C   . SER B 1 1   ? 20.065  -3.868  29.861  1.00 15.40 ? ? ? ? ? ? -1   SER B C   1 
ATOM   2753 O  O   . SER B 1 1   ? 21.007  -3.244  29.358  1.00 14.46 ? ? ? ? ? ? -1   SER B O   1 
ATOM   2754 C  CB  . SER B 1 1   ? 20.848  -5.759  31.286  1.00 23.70 ? ? ? ? ? ? -1   SER B CB  1 
ATOM   2755 O  OG  . SER B 1 1   ? 22.226  -5.469  31.143  1.00 36.20 ? ? ? ? ? ? -1   SER B OG  1 
ATOM   2756 N  N   . HIS B 1 2   ? 18.979  -3.279  30.339  1.00 14.57 ? ? ? ? ? ? 0    HIS B N   1 
ATOM   2757 C  CA  . HIS B 1 2   ? 18.761  -1.855  30.149  1.00 12.04 ? ? ? ? ? ? 0    HIS B CA  1 
ATOM   2758 C  C   . HIS B 1 2   ? 19.864  -1.019  30.785  1.00 18.52 ? ? ? ? ? ? 0    HIS B C   1 
ATOM   2759 O  O   . HIS B 1 2   ? 20.293  -1.278  31.914  1.00 14.50 ? ? ? ? ? ? 0    HIS B O   1 
ATOM   2760 C  CB  . HIS B 1 2   ? 17.434  -1.441  30.745  1.00 14.64 ? ? ? ? ? ? 0    HIS B CB  1 
ATOM   2761 C  CG  . HIS B 1 2   ? 17.273  0.039   30.799  1.00 17.14 ? ? ? ? ? ? 0    HIS B CG  1 
ATOM   2762 N  ND1 . HIS B 1 2   ? 17.017  0.794   29.674  1.00 14.12 ? ? ? ? ? ? 0    HIS B ND1 1 
ATOM   2763 C  CD2 . HIS B 1 2   ? 17.411  0.913   31.822  1.00 13.78 ? ? ? ? ? ? 0    HIS B CD2 1 
ATOM   2764 C  CE1 . HIS B 1 2   ? 16.963  2.068   30.012  1.00 15.42 ? ? ? ? ? ? 0    HIS B CE1 1 
ATOM   2765 N  NE2 . HIS B 1 2   ? 17.188  2.166   31.311  1.00 14.12 ? ? ? ? ? ? 0    HIS B NE2 1 
ATOM   2766 N  N   . MET B 1 3   ? 20.308  0.011   30.064  1.00 12.89 ? ? ? ? ? ? 1    MET B N   1 
ATOM   2767 C  CA  . MET B 1 3   ? 21.208  0.989   30.667  1.00 13.18 ? ? ? ? ? ? 1    MET B CA  1 
ATOM   2768 C  C   . MET B 1 3   ? 20.837  2.387   30.188  1.00 14.60 ? ? ? ? ? ? 1    MET B C   1 
ATOM   2769 O  O   . MET B 1 3   ? 20.538  3.274   30.995  1.00 16.59 ? ? ? ? ? ? 1    MET B O   1 
ATOM   2770 C  CB  . MET B 1 3   ? 22.673  0.663   30.346  1.00 14.89 ? ? ? ? ? ? 1    MET B CB  1 
ATOM   2771 C  CG  . MET B 1 3   ? 23.652  1.719   30.846  1.00 13.11 ? ? ? ? ? ? 1    MET B CG  1 
ATOM   2772 S  SD  . MET B 1 3   ? 23.748  1.666   32.672  1.00 16.37 ? ? ? ? ? ? 1    MET B SD  1 
ATOM   2773 C  CE  . MET B 1 3   ? 23.813  -0.109  32.973  1.00 17.75 ? ? ? ? ? ? 1    MET B CE  1 
ATOM   2774 N  N   . THR B 1 4   ? 20.808  2.575   28.878  1.00 15.75 ? ? ? ? ? ? 2    THR B N   1 
ATOM   2775 C  CA  . THR B 1 4   ? 20.587  3.878   28.271  1.00 11.77 ? ? ? ? ? ? 2    THR B CA  1 
ATOM   2776 C  C   . THR B 1 4   ? 19.140  4.048   27.819  1.00 13.80 ? ? ? ? ? ? 2    THR B C   1 
ATOM   2777 O  O   . THR B 1 4   ? 18.544  3.125   27.256  1.00 17.98 ? ? ? ? ? ? 2    THR B O   1 
ATOM   2778 C  CB  . THR B 1 4   ? 21.524  4.042   27.070  1.00 16.83 ? ? ? ? ? ? 2    THR B CB  1 
ATOM   2779 O  OG1 . THR B 1 4   ? 22.879  3.954   27.514  1.00 24.12 ? ? ? ? ? ? 2    THR B OG1 1 
ATOM   2780 C  CG2 . THR B 1 4   ? 21.304  5.383   26.367  1.00 20.24 ? ? ? ? ? ? 2    THR B CG2 1 
ATOM   2781 N  N   A ASN B 1 5   ? 18.574  5.220   28.102  0.47 14.85 ? ? ? ? ? ? 3    ASN B N   1 
ATOM   2782 N  N   B ASN B 1 5   ? 18.587  5.243   28.043  0.53 14.93 ? ? ? ? ? ? 3    ASN B N   1 
ATOM   2783 C  CA  A ASN B 1 5   ? 17.307  5.644   27.518  0.47 16.06 ? ? ? ? ? ? 3    ASN B CA  1 
ATOM   2784 C  CA  B ASN B 1 5   ? 17.278  5.632   27.518  0.53 15.94 ? ? ? ? ? ? 3    ASN B CA  1 
ATOM   2785 C  C   A ASN B 1 5   ? 17.617  6.427   26.245  0.47 15.62 ? ? ? ? ? ? 3    ASN B C   1 
ATOM   2786 C  C   B ASN B 1 5   ? 17.504  6.479   26.267  0.53 15.61 ? ? ? ? ? ? 3    ASN B C   1 
ATOM   2787 O  O   A ASN B 1 5   ? 18.309  7.449   26.300  0.47 15.78 ? ? ? ? ? ? 3    ASN B O   1 
ATOM   2788 O  O   B ASN B 1 5   ? 18.007  7.602   26.356  0.53 15.56 ? ? ? ? ? ? 3    ASN B O   1 
ATOM   2789 C  CB  A ASN B 1 5   ? 16.514  6.516   28.495  0.47 18.31 ? ? ? ? ? ? 3    ASN B CB  1 
ATOM   2790 C  CB  B ASN B 1 5   ? 16.484  6.408   28.569  0.53 18.33 ? ? ? ? ? ? 3    ASN B CB  1 
ATOM   2791 C  CG  A ASN B 1 5   ? 15.817  5.713   29.588  0.47 16.61 ? ? ? ? ? ? 3    ASN B CG  1 
ATOM   2792 C  CG  B ASN B 1 5   ? 15.051  6.698   28.138  0.53 17.69 ? ? ? ? ? ? 3    ASN B CG  1 
ATOM   2793 O  OD1 A ASN B 1 5   ? 15.514  4.532   29.422  0.47 16.91 ? ? ? ? ? ? 3    ASN B OD1 1 
ATOM   2794 O  OD1 B ASN B 1 5   ? 14.813  7.379   27.145  0.53 23.68 ? ? ? ? ? ? 3    ASN B OD1 1 
ATOM   2795 N  ND2 A ASN B 1 5   ? 15.531  6.372   30.703  0.47 15.97 ? ? ? ? ? ? 3    ASN B ND2 1 
ATOM   2796 N  ND2 B ASN B 1 5   ? 14.091  6.188   28.897  0.53 20.96 ? ? ? ? ? ? 3    ASN B ND2 1 
ATOM   2797 N  N   . LEU B 1 6   ? 17.127  5.951   25.102  1.00 13.44 ? ? ? ? ? ? 4    LEU B N   1 
ATOM   2798 C  CA  . LEU B 1 6   ? 17.400  6.672   23.864  1.00 10.69 ? ? ? ? ? ? 4    LEU B CA  1 
ATOM   2799 C  C   . LEU B 1 6   ? 16.460  7.867   23.699  1.00 13.50 ? ? ? ? ? ? 4    LEU B C   1 
ATOM   2800 O  O   . LEU B 1 6   ? 15.350  7.905   24.241  1.00 14.76 ? ? ? ? ? ? 4    LEU B O   1 
ATOM   2801 C  CB  . LEU B 1 6   ? 17.283  5.749   22.649  1.00 8.51  ? ? ? ? ? ? 4    LEU B CB  1 
ATOM   2802 C  CG  . LEU B 1 6   ? 18.230  4.545   22.692  1.00 13.30 ? ? ? ? ? ? 4    LEU B CG  1 
ATOM   2803 C  CD1 . LEU B 1 6   ? 17.846  3.513   21.613  1.00 13.43 ? ? ? ? ? ? 4    LEU B CD1 1 
ATOM   2804 C  CD2 . LEU B 1 6   ? 19.694  4.982   22.580  1.00 10.06 ? ? ? ? ? ? 4    LEU B CD2 1 
ATOM   2805 N  N   . GLN B 1 7   ? 16.921  8.848   22.928  1.00 9.17  ? ? ? ? ? ? 5    GLN B N   1 
ATOM   2806 C  CA  . GLN B 1 7   ? 16.096  10.006  22.604  1.00 12.52 ? ? ? ? ? ? 5    GLN B CA  1 
ATOM   2807 C  C   . GLN B 1 7   ? 14.920  9.583   21.731  1.00 13.28 ? ? ? ? ? ? 5    GLN B C   1 
ATOM   2808 O  O   . GLN B 1 7   ? 15.053  8.718   20.859  1.00 12.60 ? ? ? ? ? ? 5    GLN B O   1 
ATOM   2809 C  CB  . GLN B 1 7   ? 16.929  11.064  21.879  1.00 12.61 ? ? ? ? ? ? 5    GLN B CB  1 
ATOM   2810 C  CG  . GLN B 1 7   ? 18.088  11.604  22.716  1.00 13.45 ? ? ? ? ? ? 5    GLN B CG  1 
ATOM   2811 C  CD  . GLN B 1 7   ? 18.896  12.659  21.992  1.00 14.90 ? ? ? ? ? ? 5    GLN B CD  1 
ATOM   2812 O  OE1 . GLN B 1 7   ? 18.341  13.583  21.392  1.00 15.10 ? ? ? ? ? ? 5    GLN B OE1 1 
ATOM   2813 N  NE2 . GLN B 1 7   ? 20.218  12.534  22.050  1.00 16.21 ? ? ? ? ? ? 5    GLN B NE2 1 
ATOM   2814 N  N   . THR B 1 8   ? 13.766  10.199  21.960  1.00 9.79  ? ? ? ? ? ? 6    THR B N   1 
ATOM   2815 C  CA  . THR B 1 8   ? 12.556  9.878   21.211  1.00 13.43 ? ? ? ? ? ? 6    THR B CA  1 
ATOM   2816 C  C   . THR B 1 8   ? 12.020  11.143  20.550  1.00 10.13 ? ? ? ? ? ? 6    THR B C   1 
ATOM   2817 O  O   . THR B 1 8   ? 11.890  12.180  21.201  1.00 12.82 ? ? ? ? ? ? 6    THR B O   1 
ATOM   2818 C  CB  . THR B 1 8   ? 11.497  9.255   22.127  1.00 13.68 ? ? ? ? ? ? 6    THR B CB  1 
ATOM   2819 O  OG1 . THR B 1 8   ? 12.063  8.118   22.792  1.00 14.12 ? ? ? ? ? ? 6    THR B OG1 1 
ATOM   2820 C  CG2 . THR B 1 8   ? 10.282  8.788   21.327  1.00 13.28 ? ? ? ? ? ? 6    THR B CG2 1 
ATOM   2821 N  N   . PHE B 1 9   ? 11.724  11.059  19.261  1.00 11.73 ? ? ? ? ? ? 7    PHE B N   1 
ATOM   2822 C  CA  . PHE B 1 9   ? 11.195  12.186  18.505  1.00 10.89 ? ? ? ? ? ? 7    PHE B CA  1 
ATOM   2823 C  C   . PHE B 1 9   ? 9.847   11.816  17.909  1.00 13.21 ? ? ? ? ? ? 7    PHE B C   1 
ATOM   2824 O  O   . PHE B 1 9   ? 9.592   10.651  17.598  1.00 12.53 ? ? ? ? ? ? 7    PHE B O   1 
ATOM   2825 C  CB  . PHE B 1 9   ? 12.155  12.604  17.385  1.00 9.77  ? ? ? ? ? ? 7    PHE B CB  1 
ATOM   2826 C  CG  . PHE B 1 9   ? 13.519  12.978  17.879  1.00 11.65 ? ? ? ? ? ? 7    PHE B CG  1 
ATOM   2827 C  CD1 . PHE B 1 9   ? 13.791  14.286  18.277  1.00 11.68 ? ? ? ? ? ? 7    PHE B CD1 1 
ATOM   2828 C  CD2 . PHE B 1 9   ? 14.527  12.028  17.964  1.00 11.33 ? ? ? ? ? ? 7    PHE B CD2 1 
ATOM   2829 C  CE1 . PHE B 1 9   ? 15.047  14.641  18.735  1.00 13.50 ? ? ? ? ? ? 7    PHE B CE1 1 
ATOM   2830 C  CE2 . PHE B 1 9   ? 15.794  12.378  18.423  1.00 13.88 ? ? ? ? ? ? 7    PHE B CE2 1 
ATOM   2831 C  CZ  . PHE B 1 9   ? 16.050  13.684  18.817  1.00 13.58 ? ? ? ? ? ? 7    PHE B CZ  1 
ATOM   2832 N  N   . GLU B 1 10  ? 8.980   12.811  17.743  1.00 8.77  ? ? ? ? ? ? 8    GLU B N   1 
ATOM   2833 C  CA  . GLU B 1 10  ? 7.735   12.621  17.017  1.00 16.61 ? ? ? ? ? ? 8    GLU B CA  1 
ATOM   2834 C  C   . GLU B 1 10  ? 7.825   13.394  15.711  1.00 15.18 ? ? ? ? ? ? 8    GLU B C   1 
ATOM   2835 O  O   . GLU B 1 10  ? 7.975   14.622  15.721  1.00 15.94 ? ? ? ? ? ? 8    GLU B O   1 
ATOM   2836 C  CB  . GLU B 1 10  ? 6.521   13.070  17.827  1.00 26.25 ? ? ? ? ? ? 8    GLU B CB  1 
ATOM   2837 C  CG  . GLU B 1 10  ? 5.214   12.659  17.165  1.00 31.33 ? ? ? ? ? ? 8    GLU B CG  1 
ATOM   2838 C  CD  . GLU B 1 10  ? 4.032   12.728  18.103  1.00 45.43 ? ? ? ? ? ? 8    GLU B CD  1 
ATOM   2839 O  OE1 . GLU B 1 10  ? 4.203   13.222  19.238  1.00 57.39 ? ? ? ? ? ? 8    GLU B OE1 1 
ATOM   2840 O  OE2 . GLU B 1 10  ? 2.934   12.288  17.704  1.00 50.80 ? ? ? ? ? ? 8    GLU B OE2 1 
ATOM   2841 N  N   . LEU B 1 11  ? 7.747   12.679  14.600  1.00 12.90 ? ? ? ? ? ? 9    LEU B N   1 
ATOM   2842 C  CA  . LEU B 1 11  ? 7.890   13.326  13.304  1.00 10.63 ? ? ? ? ? ? 9    LEU B CA  1 
ATOM   2843 C  C   . LEU B 1 11  ? 6.573   13.979  12.880  1.00 17.39 ? ? ? ? ? ? 9    LEU B C   1 
ATOM   2844 O  O   . LEU B 1 11  ? 5.499   13.403  13.088  1.00 11.40 ? ? ? ? ? ? 9    LEU B O   1 
ATOM   2845 C  CB  . LEU B 1 11  ? 8.325   12.309  12.240  1.00 12.39 ? ? ? ? ? ? 9    LEU B CB  1 
ATOM   2846 C  CG  . LEU B 1 11  ? 9.552   11.454  12.555  1.00 13.11 ? ? ? ? ? ? 9    LEU B CG  1 
ATOM   2847 C  CD1 . LEU B 1 11  ? 9.903   10.539  11.369  1.00 14.21 ? ? ? ? ? ? 9    LEU B CD1 1 
ATOM   2848 C  CD2 . LEU B 1 11  ? 10.726  12.355  12.919  1.00 13.11 ? ? ? ? ? ? 9    LEU B CD2 1 
ATOM   2849 N  N   . PRO B 1 12  ? 6.631   15.172  12.277  1.00 12.07 ? ? ? ? ? ? 10   PRO B N   1 
ATOM   2850 C  CA  . PRO B 1 12  ? 5.432   15.741  11.649  1.00 15.97 ? ? ? ? ? ? 10   PRO B CA  1 
ATOM   2851 C  C   . PRO B 1 12  ? 5.027   14.920  10.433  1.00 14.32 ? ? ? ? ? ? 10   PRO B C   1 
ATOM   2852 O  O   . PRO B 1 12  ? 5.863   14.313  9.761   1.00 15.81 ? ? ? ? ? ? 10   PRO B O   1 
ATOM   2853 C  CB  . PRO B 1 12  ? 5.880   17.153  11.242  1.00 15.96 ? ? ? ? ? ? 10   PRO B CB  1 
ATOM   2854 C  CG  . PRO B 1 12  ? 7.343   16.975  10.940  1.00 16.09 ? ? ? ? ? ? 10   PRO B CG  1 
ATOM   2855 C  CD  . PRO B 1 12  ? 7.841   15.958  11.967  1.00 11.60 ? ? ? ? ? ? 10   PRO B CD  1 
ATOM   2856 N  N   . THR B 1 13  ? 3.720   14.890  10.168  1.00 15.85 ? ? ? ? ? ? 11   THR B N   1 
ATOM   2857 C  CA  . THR B 1 13  ? 3.210   14.183  8.995   1.00 16.22 ? ? ? ? ? ? 11   THR B CA  1 
ATOM   2858 C  C   . THR B 1 13  ? 3.858   14.701  7.718   1.00 18.39 ? ? ? ? ? ? 11   THR B C   1 
ATOM   2859 O  O   . THR B 1 13  ? 4.272   13.920  6.853   1.00 19.12 ? ? ? ? ? ? 11   THR B O   1 
ATOM   2860 C  CB  . THR B 1 13  ? 1.688   14.316  8.920   1.00 18.12 ? ? ? ? ? ? 11   THR B CB  1 
ATOM   2861 O  OG1 . THR B 1 13  ? 1.106   13.793  10.118  1.00 23.49 ? ? ? ? ? ? 11   THR B OG1 1 
ATOM   2862 C  CG2 . THR B 1 13  ? 1.141   13.548  7.712   1.00 21.23 ? ? ? ? ? ? 11   THR B CG2 1 
ATOM   2863 N  N   . GLU B 1 14  ? 3.959   16.017  7.579   1.00 14.95 ? ? ? ? ? ? 12   GLU B N   1 
ATOM   2864 C  CA  . GLU B 1 14  ? 4.651   16.616  6.449   1.00 17.86 ? ? ? ? ? ? 12   GLU B CA  1 
ATOM   2865 C  C   . GLU B 1 14  ? 5.819   17.453  6.948   1.00 14.00 ? ? ? ? ? ? 12   GLU B C   1 
ATOM   2866 O  O   . GLU B 1 14  ? 5.729   18.111  7.986   1.00 17.72 ? ? ? ? ? ? 12   GLU B O   1 
ATOM   2867 C  CB  . GLU B 1 14  ? 3.706   17.486  5.609   1.00 23.35 ? ? ? ? ? ? 12   GLU B CB  1 
ATOM   2868 C  CG  . GLU B 1 14  ? 2.489   16.747  5.085   1.00 26.72 ? ? ? ? ? ? 12   GLU B CG  1 
ATOM   2869 C  CD  . GLU B 1 14  ? 2.825   15.720  4.019   1.00 35.55 ? ? ? ? ? ? 12   GLU B CD  1 
ATOM   2870 O  OE1 . GLU B 1 14  ? 1.955   14.875  3.727   1.00 43.20 ? ? ? ? ? ? 12   GLU B OE1 1 
ATOM   2871 O  OE2 . GLU B 1 14  ? 3.946   15.753  3.466   1.00 36.22 ? ? ? ? ? ? 12   GLU B OE2 1 
ATOM   2872 N  N   . VAL B 1 15  ? 6.919   17.402  6.212   1.00 15.58 ? ? ? ? ? ? 13   VAL B N   1 
ATOM   2873 C  CA  . VAL B 1 15  ? 8.089   18.228  6.467   1.00 15.03 ? ? ? ? ? ? 13   VAL B CA  1 
ATOM   2874 C  C   . VAL B 1 15  ? 8.085   19.313  5.397   1.00 15.15 ? ? ? ? ? ? 13   VAL B C   1 
ATOM   2875 O  O   . VAL B 1 15  ? 8.118   19.003  4.204   1.00 14.71 ? ? ? ? ? ? 13   VAL B O   1 
ATOM   2876 C  CB  . VAL B 1 15  ? 9.379   17.389  6.416   1.00 13.09 ? ? ? ? ? ? 13   VAL B CB  1 
ATOM   2877 C  CG1 . VAL B 1 15  ? 10.623  18.272  6.573   1.00 11.58 ? ? ? ? ? ? 13   VAL B CG1 1 
ATOM   2878 C  CG2 . VAL B 1 15  ? 9.340   16.274  7.476   1.00 12.92 ? ? ? ? ? ? 13   VAL B CG2 1 
ATOM   2879 N  N   . THR B 1 16  ? 8.028   20.584  5.805   1.00 14.51 ? ? ? ? ? ? 14   THR B N   1 
ATOM   2880 C  CA  . THR B 1 16  ? 7.919   21.659  4.827   1.00 16.68 ? ? ? ? ? ? 14   THR B CA  1 
ATOM   2881 C  C   . THR B 1 16  ? 9.182   22.494  4.677   1.00 18.37 ? ? ? ? ? ? 14   THR B C   1 
ATOM   2882 O  O   . THR B 1 16  ? 9.303   23.224  3.691   1.00 15.26 ? ? ? ? ? ? 14   THR B O   1 
ATOM   2883 C  CB  . THR B 1 16  ? 6.755   22.595  5.187   1.00 19.00 ? ? ? ? ? ? 14   THR B CB  1 
ATOM   2884 O  OG1 . THR B 1 16  ? 7.059   23.302  6.398   1.00 17.99 ? ? ? ? ? ? 14   THR B OG1 1 
ATOM   2885 C  CG2 . THR B 1 16  ? 5.487   21.808  5.385   1.00 21.25 ? ? ? ? ? ? 14   THR B CG2 1 
ATOM   2886 N  N   . GLY B 1 17  ? 10.116  22.410  5.615   1.00 15.37 ? ? ? ? ? ? 15   GLY B N   1 
ATOM   2887 C  CA  . GLY B 1 17  ? 11.292  23.249  5.582   1.00 12.12 ? ? ? ? ? ? 15   GLY B CA  1 
ATOM   2888 C  C   . GLY B 1 17  ? 11.225  24.478  6.464   1.00 12.79 ? ? ? ? ? ? 15   GLY B C   1 
ATOM   2889 O  O   . GLY B 1 17  ? 12.145  25.302  6.419   1.00 12.68 ? ? ? ? ? ? 15   GLY B O   1 
ATOM   2890 N  N   . CYS B 1 18  ? 10.162  24.635  7.247   1.00 14.87 ? ? ? ? ? ? 16   CYS B N   1 
ATOM   2891 C  CA  . CYS B 1 18  ? 10.099  25.744  8.185   1.00 13.93 ? ? ? ? ? ? 16   CYS B CA  1 
ATOM   2892 C  C   . CYS B 1 18  ? 11.211  25.607  9.225   1.00 13.95 ? ? ? ? ? ? 16   CYS B C   1 
ATOM   2893 O  O   . CYS B 1 18  ? 11.861  24.558  9.360   1.00 12.65 ? ? ? ? ? ? 16   CYS B O   1 
ATOM   2894 C  CB  . CYS B 1 18  ? 8.729   25.801  8.851   1.00 16.31 ? ? ? ? ? ? 16   CYS B CB  1 
ATOM   2895 S  SG  . CYS B 1 18  ? 8.430   24.439  10.004  1.00 23.05 ? ? ? ? ? ? 16   CYS B SG  1 
ATOM   2896 N  N   . ALA B 1 19  ? 11.441  26.692  9.962   1.00 13.57 ? ? ? ? ? ? 17   ALA B N   1 
ATOM   2897 C  CA  . ALA B 1 19  ? 12.616  26.735  10.825  1.00 14.71 ? ? ? ? ? ? 17   ALA B CA  1 
ATOM   2898 C  C   . ALA B 1 19  ? 12.540  25.694  11.937  1.00 14.56 ? ? ? ? ? ? 17   ALA B C   1 
ATOM   2899 O  O   . ALA B 1 19  ? 13.579  25.221  12.412  1.00 14.66 ? ? ? ? ? ? 17   ALA B O   1 
ATOM   2900 C  CB  . ALA B 1 19  ? 12.791  28.146  11.398  1.00 12.37 ? ? ? ? ? ? 17   ALA B CB  1 
ATOM   2901 N  N   . ALA B 1 20  ? 11.332  25.306  12.350  1.00 13.84 ? ? ? ? ? ? 18   ALA B N   1 
ATOM   2902 C  CA  . ALA B 1 20  ? 11.210  24.249  13.349  1.00 12.78 ? ? ? ? ? ? 18   ALA B CA  1 
ATOM   2903 C  C   . ALA B 1 20  ? 11.578  22.886  12.766  1.00 15.00 ? ? ? ? ? ? 18   ALA B C   1 
ATOM   2904 O  O   . ALA B 1 20  ? 12.159  22.048  13.465  1.00 12.92 ? ? ? ? ? ? 18   ALA B O   1 
ATOM   2905 C  CB  . ALA B 1 20  ? 9.795   24.217  13.927  1.00 14.23 ? ? ? ? ? ? 18   ALA B CB  1 
ATOM   2906 N  N   . ASP B 1 21  ? 11.248  22.640  11.489  1.00 13.84 ? ? ? ? ? ? 19   ASP B N   1 
ATOM   2907 C  CA  . ASP B 1 21  ? 11.710  21.414  10.836  1.00 12.67 ? ? ? ? ? ? 19   ASP B CA  1 
ATOM   2908 C  C   . ASP B 1 21  ? 13.228  21.326  10.849  1.00 11.70 ? ? ? ? ? ? 19   ASP B C   1 
ATOM   2909 O  O   . ASP B 1 21  ? 13.792  20.255  11.103  1.00 15.97 ? ? ? ? ? ? 19   ASP B O   1 
ATOM   2910 C  CB  . ASP B 1 21  ? 11.214  21.329  9.389   1.00 12.14 ? ? ? ? ? ? 19   ASP B CB  1 
ATOM   2911 C  CG  . ASP B 1 21  ? 9.724   21.024  9.282   1.00 15.23 ? ? ? ? ? ? 19   ASP B CG  1 
ATOM   2912 O  OD1 . ASP B 1 21  ? 9.130   20.547  10.266  1.00 16.79 ? ? ? ? ? ? 19   ASP B OD1 1 
ATOM   2913 O  OD2 . ASP B 1 21  ? 9.160   21.209  8.181   1.00 15.20 ? ? ? ? ? ? 19   ASP B OD2 1 
ATOM   2914 N  N   . ILE B 1 22  ? 13.906  22.436  10.548  1.00 10.61 ? ? ? ? ? ? 20   ILE B N   1 
ATOM   2915 C  CA  . ILE B 1 22  ? 15.366  22.436  10.538  1.00 13.24 ? ? ? ? ? ? 20   ILE B CA  1 
ATOM   2916 C  C   . ILE B 1 22  ? 15.901  22.106  11.926  1.00 15.25 ? ? ? ? ? ? 20   ILE B C   1 
ATOM   2917 O  O   . ILE B 1 22  ? 16.835  21.306  12.082  1.00 12.94 ? ? ? ? ? ? 20   ILE B O   1 
ATOM   2918 C  CB  . ILE B 1 22  ? 15.896  23.792  10.042  1.00 11.13 ? ? ? ? ? ? 20   ILE B CB  1 
ATOM   2919 C  CG1 . ILE B 1 22  ? 15.558  23.984  8.564   1.00 14.35 ? ? ? ? ? ? 20   ILE B CG1 1 
ATOM   2920 C  CG2 . ILE B 1 22  ? 17.412  23.897  10.266  1.00 12.53 ? ? ? ? ? ? 20   ILE B CG2 1 
ATOM   2921 C  CD1 . ILE B 1 22  ? 16.064  25.309  8.005   1.00 17.76 ? ? ? ? ? ? 20   ILE B CD1 1 
ATOM   2922 N  N   . SER B 1 23  ? 15.314  22.727  12.951  1.00 11.37 ? ? ? ? ? ? 21   SER B N   1 
ATOM   2923 C  CA  . SER B 1 23  ? 15.733  22.471  14.328  1.00 14.47 ? ? ? ? ? ? 21   SER B CA  1 
ATOM   2924 C  C   . SER B 1 23  ? 15.577  20.997  14.687  1.00 11.76 ? ? ? ? ? ? 21   SER B C   1 
ATOM   2925 O  O   . SER B 1 23  ? 16.458  20.411  15.328  1.00 11.01 ? ? ? ? ? ? 21   SER B O   1 
ATOM   2926 C  CB  . SER B 1 23  ? 14.917  23.344  15.281  1.00 13.82 ? ? ? ? ? ? 21   SER B CB  1 
ATOM   2927 O  OG  . SER B 1 23  ? 15.249  23.075  16.624  1.00 19.65 ? ? ? ? ? ? 21   SER B OG  1 
ATOM   2928 N  N   . LEU B 1 24  ? 14.468  20.381  14.273  1.00 12.31 ? ? ? ? ? ? 22   LEU B N   1 
ATOM   2929 C  CA  . LEU B 1 24  ? 14.254  18.956  14.525  1.00 11.31 ? ? ? ? ? ? 22   LEU B CA  1 
ATOM   2930 C  C   . LEU B 1 24  ? 15.276  18.106  13.775  1.00 11.19 ? ? ? ? ? ? 22   LEU B C   1 
ATOM   2931 O  O   . LEU B 1 24  ? 15.890  17.205  14.359  1.00 10.86 ? ? ? ? ? ? 22   LEU B O   1 
ATOM   2932 C  CB  . LEU B 1 24  ? 12.829  18.559  14.131  1.00 9.79  ? ? ? ? ? ? 22   LEU B CB  1 
ATOM   2933 C  CG  . LEU B 1 24  ? 12.514  17.062  14.036  1.00 8.65  ? ? ? ? ? ? 22   LEU B CG  1 
ATOM   2934 C  CD1 . LEU B 1 24  ? 12.718  16.384  15.400  1.00 10.65 ? ? ? ? ? ? 22   LEU B CD1 1 
ATOM   2935 C  CD2 . LEU B 1 24  ? 11.076  16.853  13.556  1.00 11.88 ? ? ? ? ? ? 22   LEU B CD2 1 
ATOM   2936 N  N   . GLY B 1 25  ? 15.470  18.380  12.480  1.00 10.10 ? ? ? ? ? ? 23   GLY B N   1 
ATOM   2937 C  CA  . GLY B 1 25  ? 16.469  17.649  11.715  1.00 10.31 ? ? ? ? ? ? 23   GLY B CA  1 
ATOM   2938 C  C   . GLY B 1 25  ? 17.857  17.754  12.319  1.00 10.73 ? ? ? ? ? ? 23   GLY B C   1 
ATOM   2939 O  O   . GLY B 1 25  ? 18.587  16.763  12.407  1.00 9.55  ? ? ? ? ? ? 23   GLY B O   1 
ATOM   2940 N  N   . ARG B 1 26  ? 18.226  18.948  12.776  1.00 10.53 ? ? ? ? ? ? 24   ARG B N   1 
ATOM   2941 C  CA  . ARG B 1 26  ? 19.498  19.108  13.471  1.00 10.69 ? ? ? ? ? ? 24   ARG B CA  1 
ATOM   2942 C  C   . ARG B 1 26  ? 19.545  18.263  14.744  1.00 9.15  ? ? ? ? ? ? 24   ARG B C   1 
ATOM   2943 O  O   . ARG B 1 26  ? 20.588  17.692  15.081  1.00 10.50 ? ? ? ? ? ? 24   ARG B O   1 
ATOM   2944 C  CB  . ARG B 1 26  ? 19.719  20.591  13.784  1.00 14.02 ? ? ? ? ? ? 24   ARG B CB  1 
ATOM   2945 C  CG  . ARG B 1 26  ? 21.112  20.932  14.254  1.00 16.55 ? ? ? ? ? ? 24   ARG B CG  1 
ATOM   2946 C  CD  . ARG B 1 26  ? 21.289  22.442  14.277  1.00 20.12 ? ? ? ? ? ? 24   ARG B CD  1 
ATOM   2947 N  NE  . ARG B 1 26  ? 20.252  23.092  15.079  1.00 19.73 ? ? ? ? ? ? 24   ARG B NE  1 
ATOM   2948 C  CZ  . ARG B 1 26  ? 19.471  24.075  14.643  1.00 18.41 ? ? ? ? ? ? 24   ARG B CZ  1 
ATOM   2949 N  NH1 . ARG B 1 26  ? 19.616  24.535  13.405  1.00 23.49 ? ? ? ? ? ? 24   ARG B NH1 1 
ATOM   2950 N  NH2 . ARG B 1 26  ? 18.549  24.597  15.446  1.00 17.31 ? ? ? ? ? ? 24   ARG B NH2 1 
ATOM   2951 N  N   . ALA B 1 27  ? 18.428  18.170  15.466  1.00 9.44  ? ? ? ? ? ? 25   ALA B N   1 
ATOM   2952 C  CA  . ALA B 1 27  ? 18.407  17.338  16.669  1.00 9.32  ? ? ? ? ? ? 25   ALA B CA  1 
ATOM   2953 C  C   . ALA B 1 27  ? 18.530  15.855  16.323  1.00 13.69 ? ? ? ? ? ? 25   ALA B C   1 
ATOM   2954 O  O   . ALA B 1 27  ? 19.165  15.092  17.063  1.00 11.72 ? ? ? ? ? ? 25   ALA B O   1 
ATOM   2955 C  CB  . ALA B 1 27  ? 17.133  17.593  17.470  1.00 9.67  ? ? ? ? ? ? 25   ALA B CB  1 
ATOM   2956 N  N   . LEU B 1 28  ? 17.926  15.428  15.210  1.00 9.64  ? ? ? ? ? ? 26   LEU B N   1 
ATOM   2957 C  CA  . LEU B 1 28  ? 18.096  14.049  14.752  1.00 9.74  ? ? ? ? ? ? 26   LEU B CA  1 
ATOM   2958 C  C   . LEU B 1 28  ? 19.562  13.746  14.470  1.00 9.41  ? ? ? ? ? ? 26   LEU B C   1 
ATOM   2959 O  O   . LEU B 1 28  ? 20.093  12.701  14.874  1.00 6.37  ? ? ? ? ? ? 26   LEU B O   1 
ATOM   2960 C  CB  . LEU B 1 28  ? 17.256  13.808  13.498  1.00 8.98  ? ? ? ? ? ? 26   LEU B CB  1 
ATOM   2961 C  CG  . LEU B 1 28  ? 15.748  14.021  13.608  1.00 13.27 ? ? ? ? ? ? 26   LEU B CG  1 
ATOM   2962 C  CD1 . LEU B 1 28  ? 15.085  13.538  12.324  1.00 13.14 ? ? ? ? ? ? 26   LEU B CD1 1 
ATOM   2963 C  CD2 . LEU B 1 28  ? 15.192  13.269  14.815  1.00 7.55  ? ? ? ? ? ? 26   LEU B CD2 1 
ATOM   2964 N  N   . ILE B 1 29  ? 20.228  14.647  13.755  1.00 9.09  ? ? ? ? ? ? 27   ILE B N   1 
ATOM   2965 C  CA  . ILE B 1 29  ? 21.643  14.465  13.453  1.00 11.09 ? ? ? ? ? ? 27   ILE B CA  1 
ATOM   2966 C  C   . ILE B 1 29  ? 22.460  14.400  14.741  1.00 11.52 ? ? ? ? ? ? 27   ILE B C   1 
ATOM   2967 O  O   . ILE B 1 29  ? 23.315  13.522  14.912  1.00 13.47 ? ? ? ? ? ? 27   ILE B O   1 
ATOM   2968 C  CB  . ILE B 1 29  ? 22.132  15.589  12.521  1.00 10.54 ? ? ? ? ? ? 27   ILE B CB  1 
ATOM   2969 C  CG1 . ILE B 1 29  ? 21.490  15.435  11.138  1.00 9.37  ? ? ? ? ? ? 27   ILE B CG1 1 
ATOM   2970 C  CG2 . ILE B 1 29  ? 23.644  15.561  12.398  1.00 10.36 ? ? ? ? ? ? 27   ILE B CG2 1 
ATOM   2971 C  CD1 . ILE B 1 29  ? 21.549  16.732  10.292  1.00 10.12 ? ? ? ? ? ? 27   ILE B CD1 1 
ATOM   2972 N  N   . GLN B 1 30  ? 22.207  15.330  15.665  1.00 9.59  ? ? ? ? ? ? 28   GLN B N   1 
ATOM   2973 C  CA  . GLN B 1 30  ? 22.902  15.319  16.952  1.00 11.00 ? ? ? ? ? ? 28   GLN B CA  1 
ATOM   2974 C  C   . GLN B 1 30  ? 22.764  13.979  17.669  1.00 9.60  ? ? ? ? ? ? 28   GLN B C   1 
ATOM   2975 O  O   . GLN B 1 30  ? 23.732  13.472  18.256  1.00 10.74 ? ? ? ? ? ? 28   GLN B O   1 
ATOM   2976 C  CB  . GLN B 1 30  ? 22.360  16.433  17.839  1.00 12.34 ? ? ? ? ? ? 28   GLN B CB  1 
ATOM   2977 C  CG  . GLN B 1 30  ? 22.974  17.788  17.595  1.00 21.00 ? ? ? ? ? ? 28   GLN B CG  1 
ATOM   2978 C  CD  . GLN B 1 30  ? 22.751  18.696  18.793  1.00 28.26 ? ? ? ? ? ? 28   GLN B CD  1 
ATOM   2979 O  OE1 . GLN B 1 30  ? 21.648  18.748  19.344  1.00 26.83 ? ? ? ? ? ? 28   GLN B OE1 1 
ATOM   2980 N  NE2 . GLN B 1 30  ? 23.801  19.381  19.224  1.00 23.26 ? ? ? ? ? ? 28   GLN B NE2 1 
ATOM   2981 N  N   . ALA B 1 31  ? 21.560  13.403  17.656  1.00 10.53 ? ? ? ? ? ? 29   ALA B N   1 
ATOM   2982 C  CA  . ALA B 1 31  ? 21.339  12.133  18.342  1.00 9.67  ? ? ? ? ? ? 29   ALA B CA  1 
ATOM   2983 C  C   . ALA B 1 31  ? 22.096  10.995  17.668  1.00 8.41  ? ? ? ? ? ? 29   ALA B C   1 
ATOM   2984 O  O   . ALA B 1 31  ? 22.610  10.100  18.350  1.00 8.83  ? ? ? ? ? ? 29   ALA B O   1 
ATOM   2985 C  CB  . ALA B 1 31  ? 19.845  11.813  18.404  1.00 7.66  ? ? ? ? ? ? 29   ALA B CB  1 
ATOM   2986 N  N   . TRP B 1 32  ? 22.146  10.989  16.336  1.00 8.63  ? ? ? ? ? ? 30   TRP B N   1 
ATOM   2987 C  CA  . TRP B 1 32  ? 22.997  10.025  15.649  1.00 8.12  ? ? ? ? ? ? 30   TRP B CA  1 
ATOM   2988 C  C   . TRP B 1 32  ? 24.462  10.229  16.020  1.00 10.40 ? ? ? ? ? ? 30   TRP B C   1 
ATOM   2989 O  O   . TRP B 1 32  ? 25.183  9.261   16.295  1.00 10.76 ? ? ? ? ? ? 30   TRP B O   1 
ATOM   2990 C  CB  . TRP B 1 32  ? 22.808  10.132  14.135  1.00 6.94  ? ? ? ? ? ? 30   TRP B CB  1 
ATOM   2991 C  CG  . TRP B 1 32  ? 21.596  9.452   13.605  1.00 6.72  ? ? ? ? ? ? 30   TRP B CG  1 
ATOM   2992 C  CD1 . TRP B 1 32  ? 20.966  8.360   14.130  1.00 8.49  ? ? ? ? ? ? 30   TRP B CD1 1 
ATOM   2993 C  CD2 . TRP B 1 32  ? 20.872  9.799   12.417  1.00 8.49  ? ? ? ? ? ? 30   TRP B CD2 1 
ATOM   2994 N  NE1 . TRP B 1 32  ? 19.896  8.006   13.334  1.00 8.39  ? ? ? ? ? ? 30   TRP B NE1 1 
ATOM   2995 C  CE2 . TRP B 1 32  ? 19.816  8.879   12.283  1.00 11.58 ? ? ? ? ? ? 30   TRP B CE2 1 
ATOM   2996 C  CE3 . TRP B 1 32  ? 21.023  10.799  11.446  1.00 7.88  ? ? ? ? ? ? 30   TRP B CE3 1 
ATOM   2997 C  CZ2 . TRP B 1 32  ? 18.903  8.935   11.226  1.00 11.63 ? ? ? ? ? ? 30   TRP B CZ2 1 
ATOM   2998 C  CZ3 . TRP B 1 32  ? 20.117  10.858  10.404  1.00 11.69 ? ? ? ? ? ? 30   TRP B CZ3 1 
ATOM   2999 C  CH2 . TRP B 1 32  ? 19.074  9.927   10.297  1.00 11.83 ? ? ? ? ? ? 30   TRP B CH2 1 
ATOM   3000 N  N   . GLN B 1 33  ? 24.912  11.486  16.075  1.00 9.37  ? ? ? ? ? ? 31   GLN B N   1 
ATOM   3001 C  CA  . GLN B 1 33  ? 26.322  11.760  16.339  1.00 11.16 ? ? ? ? ? ? 31   GLN B CA  1 
ATOM   3002 C  C   . GLN B 1 33  ? 26.717  11.461  17.781  1.00 11.14 ? ? ? ? ? ? 31   GLN B C   1 
ATOM   3003 O  O   . GLN B 1 33  ? 27.885  11.155  18.043  1.00 12.38 ? ? ? ? ? ? 31   GLN B O   1 
ATOM   3004 C  CB  . GLN B 1 33  ? 26.644  13.212  15.974  1.00 10.46 ? ? ? ? ? ? 31   GLN B CB  1 
ATOM   3005 C  CG  . GLN B 1 33  ? 26.460  13.467  14.481  1.00 9.96  ? ? ? ? ? ? 31   GLN B CG  1 
ATOM   3006 C  CD  . GLN B 1 33  ? 26.881  14.862  14.094  1.00 11.36 ? ? ? ? ? ? 31   GLN B CD  1 
ATOM   3007 O  OE1 . GLN B 1 33  ? 26.669  15.809  14.855  1.00 11.32 ? ? ? ? ? ? 31   GLN B OE1 1 
ATOM   3008 N  NE2 . GLN B 1 33  ? 27.468  15.004  12.908  1.00 12.90 ? ? ? ? ? ? 31   GLN B NE2 1 
ATOM   3009 N  N   . LYS B 1 34  ? 25.774  11.513  18.718  1.00 8.84  ? ? ? ? ? ? 32   LYS B N   1 
ATOM   3010 C  CA  . LYS B 1 34  ? 26.051  11.172  20.109  1.00 10.06 ? ? ? ? ? ? 32   LYS B CA  1 
ATOM   3011 C  C   . LYS B 1 34  ? 25.779  9.700   20.423  1.00 10.46 ? ? ? ? ? ? 32   LYS B C   1 
ATOM   3012 O  O   . LYS B 1 34  ? 26.625  9.030   21.017  1.00 12.31 ? ? ? ? ? ? 32   LYS B O   1 
ATOM   3013 C  CB  . LYS B 1 34  ? 25.216  12.058  21.049  1.00 10.66 ? ? ? ? ? ? 32   LYS B CB  1 
ATOM   3014 C  CG  . LYS B 1 34  ? 25.374  11.704  22.530  1.00 16.05 ? ? ? ? ? ? 32   LYS B CG  1 
ATOM   3015 C  CD  . LYS B 1 34  ? 24.312  12.381  23.378  1.00 14.72 ? ? ? ? ? ? 32   LYS B CD  1 
ATOM   3016 C  CE  . LYS B 1 34  ? 24.239  11.720  24.767  1.00 24.22 ? ? ? ? ? ? 32   LYS B CE  1 
ATOM   3017 N  NZ  . LYS B 1 34  ? 23.069  12.186  25.540  1.00 30.96 ? ? ? ? ? ? 32   LYS B NZ  1 
ATOM   3018 N  N   . ASP B 1 35  ? 24.605  9.189   20.046  1.00 9.53  ? ? ? ? ? ? 33   ASP B N   1 
ATOM   3019 C  CA  . ASP B 1 35  ? 24.158  7.858   20.449  1.00 10.25 ? ? ? ? ? ? 33   ASP B CA  1 
ATOM   3020 C  C   . ASP B 1 35  ? 24.203  6.809   19.339  1.00 10.69 ? ? ? ? ? ? 33   ASP B C   1 
ATOM   3021 O  O   . ASP B 1 35  ? 24.102  5.616   19.641  1.00 8.85  ? ? ? ? ? ? 33   ASP B O   1 
ATOM   3022 C  CB  . ASP B 1 35  ? 22.717  7.924   20.973  1.00 10.06 ? ? ? ? ? ? 33   ASP B CB  1 
ATOM   3023 C  CG  . ASP B 1 35  ? 22.574  8.822   22.185  1.00 15.54 ? ? ? ? ? ? 33   ASP B CG  1 
ATOM   3024 O  OD1 . ASP B 1 35  ? 23.532  8.903   22.993  1.00 15.25 ? ? ? ? ? ? 33   ASP B OD1 1 
ATOM   3025 O  OD2 . ASP B 1 35  ? 21.498  9.441   22.323  1.00 14.02 ? ? ? ? ? ? 33   ASP B OD2 1 
ATOM   3026 N  N   . GLY B 1 36  ? 24.299  7.220   18.075  1.00 10.03 ? ? ? ? ? ? 34   GLY B N   1 
ATOM   3027 C  CA  . GLY B 1 36  ? 24.251  6.308   16.940  1.00 8.67  ? ? ? ? ? ? 34   GLY B CA  1 
ATOM   3028 C  C   . GLY B 1 36  ? 22.870  5.839   16.553  1.00 10.35 ? ? ? ? ? ? 34   GLY B C   1 
ATOM   3029 O  O   . GLY B 1 36  ? 22.733  5.085   15.578  1.00 8.32  ? ? ? ? ? ? 34   GLY B O   1 
ATOM   3030 N  N   . ILE B 1 37  ? 21.835  6.275   17.277  1.00 6.74  ? ? ? ? ? ? 35   ILE B N   1 
ATOM   3031 C  CA  . ILE B 1 37  ? 20.484  5.768   17.086  1.00 8.70  ? ? ? ? ? ? 35   ILE B CA  1 
ATOM   3032 C  C   . ILE B 1 37  ? 19.539  6.710   17.817  1.00 10.03 ? ? ? ? ? ? 35   ILE B C   1 
ATOM   3033 O  O   . ILE B 1 37  ? 19.949  7.417   18.744  1.00 11.62 ? ? ? ? ? ? 35   ILE B O   1 
ATOM   3034 C  CB  . ILE B 1 37  ? 20.389  4.315   17.630  1.00 8.24  ? ? ? ? ? ? 35   ILE B CB  1 
ATOM   3035 C  CG1 . ILE B 1 37  ? 19.072  3.641   17.229  1.00 6.77  ? ? ? ? ? ? 35   ILE B CG1 1 
ATOM   3036 C  CG2 . ILE B 1 37  ? 20.596  4.292   19.154  1.00 9.05  ? ? ? ? ? ? 35   ILE B CG2 1 
ATOM   3037 C  CD1 . ILE B 1 37  ? 19.053  2.138   17.546  1.00 12.08 ? ? ? ? ? ? 35   ILE B CD1 1 
ATOM   3038 N  N   . PHE B 1 38  ? 18.278  6.734   17.398  1.00 6.94  ? ? ? ? ? ? 36   PHE B N   1 
ATOM   3039 C  CA  . PHE B 1 38  ? 17.228  7.339   18.202  1.00 9.07  ? ? ? ? ? ? 36   PHE B CA  1 
ATOM   3040 C  C   . PHE B 1 38  ? 15.932  6.598   17.916  1.00 6.74  ? ? ? ? ? ? 36   PHE B C   1 
ATOM   3041 O  O   . PHE B 1 38  ? 15.862  5.745   17.026  1.00 8.30  ? ? ? ? ? ? 36   PHE B O   1 
ATOM   3042 C  CB  . PHE B 1 38  ? 17.091  8.861   17.950  1.00 7.37  ? ? ? ? ? ? 36   PHE B CB  1 
ATOM   3043 C  CG  . PHE B 1 38  ? 16.894  9.229   16.500  1.00 8.93  ? ? ? ? ? ? 36   PHE B CG  1 
ATOM   3044 C  CD1 . PHE B 1 38  ? 15.671  9.017   15.874  1.00 8.88  ? ? ? ? ? ? 36   PHE B CD1 1 
ATOM   3045 C  CD2 . PHE B 1 38  ? 17.922  9.791   15.768  1.00 10.52 ? ? ? ? ? ? 36   PHE B CD2 1 
ATOM   3046 C  CE1 . PHE B 1 38  ? 15.481  9.351   14.552  1.00 7.64  ? ? ? ? ? ? 36   PHE B CE1 1 
ATOM   3047 C  CE2 . PHE B 1 38  ? 17.732  10.140  14.433  1.00 9.08  ? ? ? ? ? ? 36   PHE B CE2 1 
ATOM   3048 C  CZ  . PHE B 1 38  ? 16.509  9.909   13.825  1.00 7.60  ? ? ? ? ? ? 36   PHE B CZ  1 
ATOM   3049 N  N   . GLN B 1 39  ? 14.907  6.924   18.694  1.00 7.52  ? ? ? ? ? ? 37   GLN B N   1 
ATOM   3050 C  CA  . GLN B 1 39  ? 13.570  6.375   18.528  1.00 11.97 ? ? ? ? ? ? 37   GLN B CA  1 
ATOM   3051 C  C   . GLN B 1 39  ? 12.642  7.423   17.919  1.00 9.49  ? ? ? ? ? ? 37   GLN B C   1 
ATOM   3052 O  O   . GLN B 1 39  ? 12.806  8.623   18.141  1.00 10.41 ? ? ? ? ? ? 37   GLN B O   1 
ATOM   3053 C  CB  . GLN B 1 39  ? 13.020  5.892   19.880  1.00 8.80  ? ? ? ? ? ? 37   GLN B CB  1 
ATOM   3054 C  CG  . GLN B 1 39  ? 13.938  4.863   20.523  1.00 11.21 ? ? ? ? ? ? 37   GLN B CG  1 
ATOM   3055 C  CD  . GLN B 1 39  ? 13.602  4.550   21.973  1.00 13.22 ? ? ? ? ? ? 37   GLN B CD  1 
ATOM   3056 O  OE1 . GLN B 1 39  ? 13.943  3.482   22.464  1.00 14.27 ? ? ? ? ? ? 37   GLN B OE1 1 
ATOM   3057 N  NE2 . GLN B 1 39  ? 12.958  5.491   22.672  1.00 13.30 ? ? ? ? ? ? 37   GLN B NE2 1 
ATOM   3058 N  N   . ILE B 1 40  ? 11.685  6.962   17.115  1.00 8.51  ? ? ? ? ? ? 38   ILE B N   1 
ATOM   3059 C  CA  . ILE B 1 40  ? 10.593  7.805   16.644  1.00 10.33 ? ? ? ? ? ? 38   ILE B CA  1 
ATOM   3060 C  C   . ILE B 1 40  ? 9.284   7.208   17.134  1.00 12.15 ? ? ? ? ? ? 38   ILE B C   1 
ATOM   3061 O  O   . ILE B 1 40  ? 9.075   5.991   17.066  1.00 11.50 ? ? ? ? ? ? 38   ILE B O   1 
ATOM   3062 C  CB  . ILE B 1 40  ? 10.583  7.973   15.110  1.00 10.04 ? ? ? ? ? ? 38   ILE B CB  1 
ATOM   3063 C  CG1 . ILE B 1 40  ? 10.554  6.615   14.391  1.00 9.19  ? ? ? ? ? ? 38   ILE B CG1 1 
ATOM   3064 C  CG2 . ILE B 1 40  ? 11.766  8.818   14.671  1.00 10.46 ? ? ? ? ? ? 38   ILE B CG2 1 
ATOM   3065 C  CD1 . ILE B 1 40  ? 10.440  6.762   12.851  1.00 12.10 ? ? ? ? ? ? 38   ILE B CD1 1 
ATOM   3066 N  N   . LYS B 1 41  ? 8.424   8.068   17.671  1.00 11.03 ? ? ? ? ? ? 39   LYS B N   1 
ATOM   3067 C  CA  . LYS B 1 41  ? 7.156   7.626   18.230  1.00 11.19 ? ? ? ? ? ? 39   LYS B CA  1 
ATOM   3068 C  C   . LYS B 1 41  ? 6.211   7.187   17.115  1.00 17.84 ? ? ? ? ? ? 39   LYS B C   1 
ATOM   3069 O  O   . LYS B 1 41  ? 6.068   7.873   16.100  1.00 20.95 ? ? ? ? ? ? 39   LYS B O   1 
ATOM   3070 C  CB  . LYS B 1 41  ? 6.534   8.764   19.044  1.00 20.22 ? ? ? ? ? ? 39   LYS B CB  1 
ATOM   3071 C  CG  . LYS B 1 41  ? 5.281   8.385   19.815  1.00 32.23 ? ? ? ? ? ? 39   LYS B CG  1 
ATOM   3072 C  CD  . LYS B 1 41  ? 5.618   7.460   20.976  1.00 37.42 ? ? ? ? ? ? 39   LYS B CD  1 
ATOM   3073 C  CE  . LYS B 1 41  ? 4.399   6.664   21.432  1.00 42.76 ? ? ? ? ? ? 39   LYS B CE  1 
ATOM   3074 N  NZ  . LYS B 1 41  ? 3.856   5.785   20.362  1.00 24.72 ? ? ? ? ? ? 39   LYS B NZ  1 
ATOM   3075 N  N   . THR B 1 42  ? 5.570   6.042   17.298  1.00 12.97 ? ? ? ? ? ? 40   THR B N   1 
ATOM   3076 C  CA  . THR B 1 42  ? 4.570   5.558   16.356  1.00 17.91 ? ? ? ? ? ? 40   THR B CA  1 
ATOM   3077 C  C   . THR B 1 42  ? 3.177   5.942   16.847  1.00 21.04 ? ? ? ? ? ? 40   THR B C   1 
ATOM   3078 O  O   . THR B 1 42  ? 2.948   6.099   18.047  1.00 22.17 ? ? ? ? ? ? 40   THR B O   1 
ATOM   3079 C  CB  . THR B 1 42  ? 4.649   4.031   16.190  1.00 22.54 ? ? ? ? ? ? 40   THR B CB  1 
ATOM   3080 O  OG1 . THR B 1 42  ? 4.524   3.407   17.476  1.00 17.39 ? ? ? ? ? ? 40   THR B OG1 1 
ATOM   3081 C  CG2 . THR B 1 42  ? 5.967   3.589   15.536  1.00 11.66 ? ? ? ? ? ? 40   THR B CG2 1 
ATOM   3082 N  N   . ASP B 1 43  ? 2.239   6.081   15.915  1.00 17.91 ? ? ? ? ? ? 41   ASP B N   1 
ATOM   3083 C  CA  . ASP B 1 43  ? 0.845   6.275   16.284  1.00 22.23 ? ? ? ? ? ? 41   ASP B CA  1 
ATOM   3084 C  C   . ASP B 1 43  ? 0.138   4.915   16.260  1.00 22.60 ? ? ? ? ? ? 41   ASP B C   1 
ATOM   3085 O  O   . ASP B 1 43  ? 0.746   3.880   15.969  1.00 19.59 ? ? ? ? ? ? 41   ASP B O   1 
ATOM   3086 C  CB  . ASP B 1 43  ? 0.182   7.320   15.370  1.00 21.88 ? ? ? ? ? ? 41   ASP B CB  1 
ATOM   3087 C  CG  . ASP B 1 43  ? 0.045   6.851   13.915  1.00 24.66 ? ? ? ? ? ? 41   ASP B CG  1 
ATOM   3088 O  OD1 . ASP B 1 43  ? 0.173   5.642   13.632  1.00 22.13 ? ? ? ? ? ? 41   ASP B OD1 1 
ATOM   3089 O  OD2 . ASP B 1 43  ? -0.203  7.706   13.039  1.00 28.77 ? ? ? ? ? ? 41   ASP B OD2 1 
ATOM   3090 N  N   . SER B 1 44  ? -1.166  4.911   16.560  1.00 22.06 ? ? ? ? ? ? 42   SER B N   1 
ATOM   3091 C  CA  . SER B 1 44  ? -1.854  3.635   16.774  1.00 23.58 ? ? ? ? ? ? 42   SER B CA  1 
ATOM   3092 C  C   . SER B 1 44  ? -1.896  2.783   15.505  1.00 17.83 ? ? ? ? ? ? 42   SER B C   1 
ATOM   3093 O  O   . SER B 1 44  ? -1.807  1.552   15.580  1.00 16.66 ? ? ? ? ? ? 42   SER B O   1 
ATOM   3094 C  CB  . SER B 1 44  ? -3.266  3.880   17.301  1.00 28.50 ? ? ? ? ? ? 42   SER B CB  1 
ATOM   3095 O  OG  . SER B 1 44  ? -4.021  4.625   16.363  1.00 38.64 ? ? ? ? ? ? 42   SER B OG  1 
ATOM   3096 N  N   . GLU B 1 45  ? -2.008  3.411   14.336  1.00 21.30 ? ? ? ? ? ? 43   GLU B N   1 
ATOM   3097 C  CA  . GLU B 1 45  ? -2.016  2.641   13.098  1.00 21.34 ? ? ? ? ? ? 43   GLU B CA  1 
ATOM   3098 C  C   . GLU B 1 45  ? -0.624  2.119   12.757  1.00 18.58 ? ? ? ? ? ? 43   GLU B C   1 
ATOM   3099 O  O   . GLU B 1 45  ? -0.478  0.966   12.338  1.00 15.79 ? ? ? ? ? ? 43   GLU B O   1 
ATOM   3100 C  CB  . GLU B 1 45  ? -2.571  3.491   11.960  1.00 19.06 ? ? ? ? ? ? 43   GLU B CB  1 
ATOM   3101 C  CG  . GLU B 1 45  ? -4.088  3.506   11.919  1.00 30.53 ? ? ? ? ? ? 43   GLU B CG  1 
ATOM   3102 C  CD  . GLU B 1 45  ? -4.671  2.121   11.702  1.00 24.43 ? ? ? ? ? ? 43   GLU B CD  1 
ATOM   3103 O  OE1 . GLU B 1 45  ? -4.794  1.700   10.533  1.00 34.46 ? ? ? ? ? ? 43   GLU B OE1 1 
ATOM   3104 O  OE2 . GLU B 1 45  ? -4.993  1.449   12.701  1.00 26.98 ? ? ? ? ? ? 43   GLU B OE2 1 
ATOM   3105 N  N   . GLN B 1 46  ? 0.409   2.948   12.926  1.00 13.91 ? ? ? ? ? ? 44   GLN B N   1 
ATOM   3106 C  CA  . GLN B 1 46  ? 1.766   2.463   12.694  1.00 16.68 ? ? ? ? ? ? 44   GLN B CA  1 
ATOM   3107 C  C   . GLN B 1 46  ? 2.090   1.326   13.643  1.00 17.10 ? ? ? ? ? ? 44   GLN B C   1 
ATOM   3108 O  O   . GLN B 1 46  ? 2.738   0.344   13.257  1.00 13.89 ? ? ? ? ? ? 44   GLN B O   1 
ATOM   3109 C  CB  . GLN B 1 46  ? 2.785   3.594   12.865  1.00 16.66 ? ? ? ? ? ? 44   GLN B CB  1 
ATOM   3110 C  CG  . GLN B 1 46  ? 2.716   4.702   11.834  1.00 15.21 ? ? ? ? ? ? 44   GLN B CG  1 
ATOM   3111 C  CD  . GLN B 1 46  ? 3.596   5.881   12.223  1.00 20.20 ? ? ? ? ? ? 44   GLN B CD  1 
ATOM   3112 O  OE1 . GLN B 1 46  ? 3.633   6.280   13.391  1.00 21.00 ? ? ? ? ? ? 44   GLN B OE1 1 
ATOM   3113 N  NE2 . GLN B 1 46  ? 4.299   6.452   11.247  1.00 17.69 ? ? ? ? ? ? 44   GLN B NE2 1 
ATOM   3114 N  N   . ASP B 1 47  ? 1.628   1.433   14.890  1.00 15.38 ? ? ? ? ? ? 45   ASP B N   1 
ATOM   3115 C  CA  . ASP B 1 47  ? 1.880   0.384   15.872  1.00 19.85 ? ? ? ? ? ? 45   ASP B CA  1 
ATOM   3116 C  C   . ASP B 1 47  ? 1.117   -0.891  15.538  1.00 17.05 ? ? ? ? ? ? 45   ASP B C   1 
ATOM   3117 O  O   . ASP B 1 47  ? 1.671   -1.993  15.625  1.00 16.79 ? ? ? ? ? ? 45   ASP B O   1 
ATOM   3118 C  CB  . ASP B 1 47  ? 1.503   0.859   17.269  1.00 17.09 ? ? ? ? ? ? 45   ASP B CB  1 
ATOM   3119 C  CG  . ASP B 1 47  ? 1.747   -0.206  18.308  1.00 26.23 ? ? ? ? ? ? 45   ASP B CG  1 
ATOM   3120 O  OD1 . ASP B 1 47  ? 2.926   -0.442  18.647  1.00 25.66 ? ? ? ? ? ? 45   ASP B OD1 1 
ATOM   3121 O  OD2 . ASP B 1 47  ? 0.765   -0.838  18.755  1.00 35.12 ? ? ? ? ? ? 45   ASP B OD2 1 
ATOM   3122 N  N   . ARG B 1 48  ? -0.165  -0.771  15.177  1.00 13.88 ? ? ? ? ? ? 46   ARG B N   1 
ATOM   3123 C  CA  . ARG B 1 48  ? -0.931  -1.968  14.832  1.00 16.77 ? ? ? ? ? ? 46   ARG B CA  1 
ATOM   3124 C  C   . ARG B 1 48  ? -0.310  -2.699  13.644  1.00 18.44 ? ? ? ? ? ? 46   ARG B C   1 
ATOM   3125 O  O   . ARG B 1 48  ? -0.207  -3.937  13.644  1.00 14.72 ? ? ? ? ? ? 46   ARG B O   1 
ATOM   3126 C  CB  . ARG B 1 48  ? -2.382  -1.607  14.515  1.00 21.07 ? ? ? ? ? ? 46   ARG B CB  1 
ATOM   3127 C  CG  . ARG B 1 48  ? -3.209  -2.808  14.080  1.00 21.79 ? ? ? ? ? ? 46   ARG B CG  1 
ATOM   3128 C  CD  . ARG B 1 48  ? -4.606  -2.400  13.622  1.00 22.80 ? ? ? ? ? ? 46   ARG B CD  1 
ATOM   3129 N  NE  . ARG B 1 48  ? -4.574  -1.502  12.469  1.00 22.00 ? ? ? ? ? ? 46   ARG B NE  1 
ATOM   3130 C  CZ  . ARG B 1 48  ? -4.563  -1.897  11.200  1.00 23.21 ? ? ? ? ? ? 46   ARG B CZ  1 
ATOM   3131 N  NH1 . ARG B 1 48  ? -4.575  -3.188  10.894  1.00 25.31 ? ? ? ? ? ? 46   ARG B NH1 1 
ATOM   3132 N  NH2 . ARG B 1 48  ? -4.530  -0.994  10.234  1.00 25.56 ? ? ? ? ? ? 46   ARG B NH2 1 
ATOM   3133 N  N   . LYS B 1 49  ? 0.108   -1.953  12.617  1.00 15.41 ? ? ? ? ? ? 47   LYS B N   1 
ATOM   3134 C  CA  . LYS B 1 49  ? 0.702   -2.612  11.459  1.00 13.30 ? ? ? ? ? ? 47   LYS B CA  1 
ATOM   3135 C  C   . LYS B 1 49  ? 2.018   -3.279  11.822  1.00 14.76 ? ? ? ? ? ? 47   LYS B C   1 
ATOM   3136 O  O   . LYS B 1 49  ? 2.357   -4.332  11.269  1.00 11.85 ? ? ? ? ? ? 47   LYS B O   1 
ATOM   3137 C  CB  . LYS B 1 49  ? 0.897   -1.614  10.323  1.00 13.18 ? ? ? ? ? ? 47   LYS B CB  1 
ATOM   3138 C  CG  . LYS B 1 49  ? -0.398  -1.227  9.651   1.00 16.31 ? ? ? ? ? ? 47   LYS B CG  1 
ATOM   3139 C  CD  . LYS B 1 49  ? -0.300  0.129   9.002   1.00 19.32 ? ? ? ? ? ? 47   LYS B CD  1 
ATOM   3140 C  CE  . LYS B 1 49  ? -1.680  0.620   8.576   1.00 25.79 ? ? ? ? ? ? 47   LYS B CE  1 
ATOM   3141 N  NZ  . LYS B 1 49  ? -1.611  1.795   7.643   1.00 22.53 ? ? ? ? ? ? 47   LYS B NZ  1 
ATOM   3142 N  N   . THR B 1 50  ? 2.766   -2.688  12.746  1.00 14.14 ? ? ? ? ? ? 48   THR B N   1 
ATOM   3143 C  CA  . THR B 1 50  ? 3.980   -3.336  13.220  1.00 12.83 ? ? ? ? ? ? 48   THR B CA  1 
ATOM   3144 C  C   . THR B 1 50  ? 3.661   -4.682  13.860  1.00 12.54 ? ? ? ? ? ? 48   THR B C   1 
ATOM   3145 O  O   . THR B 1 50  ? 4.264   -5.705  13.515  1.00 11.65 ? ? ? ? ? ? 48   THR B O   1 
ATOM   3146 C  CB  . THR B 1 50  ? 4.702   -2.421  14.211  1.00 13.01 ? ? ? ? ? ? 48   THR B CB  1 
ATOM   3147 O  OG1 . THR B 1 50  ? 4.974   -1.159  13.582  1.00 12.93 ? ? ? ? ? ? 48   THR B OG1 1 
ATOM   3148 C  CG2 . THR B 1 50  ? 6.011   -3.072  14.679  1.00 12.09 ? ? ? ? ? ? 48   THR B CG2 1 
ATOM   3149 N  N   . GLN B 1 51  ? 2.695   -4.704  14.786  1.00 13.99 ? ? ? ? ? ? 49   GLN B N   1 
ATOM   3150 C  CA  . GLN B 1 51  ? 2.399   -5.938  15.522  1.00 18.51 ? ? ? ? ? ? 49   GLN B CA  1 
ATOM   3151 C  C   . GLN B 1 51  ? 1.817   -7.016  14.613  1.00 15.78 ? ? ? ? ? ? 49   GLN B C   1 
ATOM   3152 O  O   . GLN B 1 51  ? 2.101   -8.213  14.793  1.00 12.88 ? ? ? ? ? ? 49   GLN B O   1 
ATOM   3153 C  CB  . GLN B 1 51  ? 1.437   -5.652  16.683  1.00 17.87 ? ? ? ? ? ? 49   GLN B CB  1 
ATOM   3154 C  CG  . GLN B 1 51  ? 1.841   -4.477  17.585  1.00 23.25 ? ? ? ? ? ? 49   GLN B CG  1 
ATOM   3155 C  CD  . GLN B 1 51  ? 3.288   -4.539  18.050  1.00 25.23 ? ? ? ? ? ? 49   GLN B CD  1 
ATOM   3156 O  OE1 . GLN B 1 51  ? 3.814   -5.613  18.345  1.00 27.47 ? ? ? ? ? ? 49   GLN B OE1 1 
ATOM   3157 N  NE2 . GLN B 1 51  ? 3.939   -3.378  18.121  1.00 26.18 ? ? ? ? ? ? 49   GLN B NE2 1 
ATOM   3158 N  N   . GLU B 1 52  ? 0.989   -6.623  13.640  1.00 14.49 ? ? ? ? ? ? 50   GLU B N   1 
ATOM   3159 C  CA  . GLU B 1 52  ? 0.428   -7.610  12.722  1.00 17.06 ? ? ? ? ? ? 50   GLU B CA  1 
ATOM   3160 C  C   . GLU B 1 52  ? 1.502   -8.201  11.814  1.00 15.91 ? ? ? ? ? ? 50   GLU B C   1 
ATOM   3161 O  O   . GLU B 1 52  ? 1.441   -9.387  11.481  1.00 12.32 ? ? ? ? ? ? 50   GLU B O   1 
ATOM   3162 C  CB  . GLU B 1 52  ? -0.706  -6.988  11.903  1.00 14.75 ? ? ? ? ? ? 50   GLU B CB  1 
ATOM   3163 C  CG  . GLU B 1 52  ? -1.943  -6.697  12.753  1.00 26.64 ? ? ? ? ? ? 50   GLU B CG  1 
ATOM   3164 C  CD  . GLU B 1 52  ? -3.139  -6.209  11.956  1.00 26.24 ? ? ? ? ? ? 50   GLU B CD  1 
ATOM   3165 O  OE1 . GLU B 1 52  ? -3.182  -6.431  10.731  1.00 26.95 ? ? ? ? ? ? 50   GLU B OE1 1 
ATOM   3166 O  OE2 . GLU B 1 52  ? -4.046  -5.600  12.565  1.00 28.46 ? ? ? ? ? ? 50   GLU B OE2 1 
ATOM   3167 N  N   . ALA B 1 53  ? 2.509   -7.408  11.432  1.00 11.06 ? ? ? ? ? ? 51   ALA B N   1 
ATOM   3168 C  CA  . ALA B 1 53  ? 3.628   -7.963  10.673  1.00 11.87 ? ? ? ? ? ? 51   ALA B CA  1 
ATOM   3169 C  C   . ALA B 1 53  ? 4.403   -8.979  11.500  1.00 11.57 ? ? ? ? ? ? 51   ALA B C   1 
ATOM   3170 O  O   . ALA B 1 53  ? 4.775   -10.047 10.992  1.00 11.52 ? ? ? ? ? ? 51   ALA B O   1 
ATOM   3171 C  CB  . ALA B 1 53  ? 4.557   -6.845  10.190  1.00 14.85 ? ? ? ? ? ? 51   ALA B CB  1 
ATOM   3172 N  N   . MET B 1 54  ? 4.653   -8.665  12.776  1.00 16.14 ? ? ? ? ? ? 52   MET B N   1 
ATOM   3173 C  CA  . MET B 1 54  ? 5.327   -9.614  13.659  1.00 14.84 ? ? ? ? ? ? 52   MET B CA  1 
ATOM   3174 C  C   . MET B 1 54  ? 4.504   -10.882 13.842  1.00 14.09 ? ? ? ? ? ? 52   MET B C   1 
ATOM   3175 O  O   . MET B 1 54  ? 5.056   -11.986 13.932  1.00 15.46 ? ? ? ? ? ? 52   MET B O   1 
ATOM   3176 C  CB  . MET B 1 54  ? 5.596   -8.971  15.017  1.00 15.62 ? ? ? ? ? ? 52   MET B CB  1 
ATOM   3177 C  CG  . MET B 1 54  ? 6.409   -7.705  14.942  1.00 24.50 ? ? ? ? ? ? 52   MET B CG  1 
ATOM   3178 S  SD  . MET B 1 54  ? 8.178   -8.054  14.955  1.00 24.85 ? ? ? ? ? ? 52   MET B SD  1 
ATOM   3179 C  CE  . MET B 1 54  ? 8.821   -6.425  15.324  1.00 20.81 ? ? ? ? ? ? 52   MET B CE  1 
ATOM   3180 N  N   . ALA B 1 55  ? 3.180   -10.741 13.914  1.00 15.81 ? ? ? ? ? ? 53   ALA B N   1 
ATOM   3181 C  CA  . ALA B 1 55  ? 2.317   -11.906 14.077  1.00 14.48 ? ? ? ? ? ? 53   ALA B CA  1 
ATOM   3182 C  C   . ALA B 1 55  ? 2.331   -12.781 12.828  1.00 12.99 ? ? ? ? ? ? 53   ALA B C   1 
ATOM   3183 O  O   . ALA B 1 55  ? 2.383   -14.011 12.931  1.00 15.86 ? ? ? ? ? ? 53   ALA B O   1 
ATOM   3184 C  CB  . ALA B 1 55  ? 0.898   -11.454 14.419  1.00 15.29 ? ? ? ? ? ? 53   ALA B CB  1 
ATOM   3185 N  N   . ALA B 1 56  ? 2.298   -12.166 11.638  1.00 11.79 ? ? ? ? ? ? 54   ALA B N   1 
ATOM   3186 C  CA  . ALA B 1 56  ? 2.456   -12.931 10.403  1.00 11.75 ? ? ? ? ? ? 54   ALA B CA  1 
ATOM   3187 C  C   . ALA B 1 56  ? 3.807   -13.633 10.352  1.00 12.48 ? ? ? ? ? ? 54   ALA B C   1 
ATOM   3188 O  O   . ALA B 1 56  ? 3.905   -14.776 9.886   1.00 12.03 ? ? ? ? ? ? 54   ALA B O   1 
ATOM   3189 C  CB  . ALA B 1 56  ? 2.279   -12.014 9.185   1.00 9.07  ? ? ? ? ? ? 54   ALA B CB  1 
ATOM   3190 N  N   . SER B 1 57  ? 4.863   -12.966 10.829  1.00 10.50 ? ? ? ? ? ? 55   SER B N   1 
ATOM   3191 C  CA  . SER B 1 57  ? 6.191   -13.569 10.805  1.00 9.98  ? ? ? ? ? ? 55   SER B CA  1 
ATOM   3192 C  C   . SER B 1 57  ? 6.237   -14.798 11.706  1.00 14.26 ? ? ? ? ? ? 55   SER B C   1 
ATOM   3193 O  O   . SER B 1 57  ? 6.799   -15.839 11.334  1.00 11.65 ? ? ? ? ? ? 55   SER B O   1 
ATOM   3194 C  CB  . SER B 1 57  ? 7.240   -12.536 11.228  1.00 9.11  ? ? ? ? ? ? 55   SER B CB  1 
ATOM   3195 O  OG  . SER B 1 57  ? 8.533   -13.125 11.317  1.00 12.63 ? ? ? ? ? ? 55   SER B OG  1 
ATOM   3196 N  N   . LYS B 1 58  ? 5.611   -14.704 12.879  1.00 12.46 ? ? ? ? ? ? 56   LYS B N   1 
ATOM   3197 C  CA  . LYS B 1 58  ? 5.567   -15.836 13.794  1.00 14.84 ? ? ? ? ? ? 56   LYS B CA  1 
ATOM   3198 C  C   . LYS B 1 58  ? 4.799   -17.011 13.188  1.00 13.07 ? ? ? ? ? ? 56   LYS B C   1 
ATOM   3199 O  O   . LYS B 1 58  ? 5.231   -18.163 13.301  1.00 13.15 ? ? ? ? ? ? 56   LYS B O   1 
ATOM   3200 C  CB  . LYS B 1 58  ? 4.953   -15.398 15.131  1.00 12.90 ? ? ? ? ? ? 56   LYS B CB  1 
ATOM   3201 C  CG  . LYS B 1 58  ? 4.611   -16.564 16.055  1.00 22.47 ? ? ? ? ? ? 56   LYS B CG  1 
ATOM   3202 C  CD  . LYS B 1 58  ? 4.003   -16.083 17.366  1.00 23.22 ? ? ? ? ? ? 56   LYS B CD  1 
ATOM   3203 C  CE  . LYS B 1 58  ? 5.084   -15.677 18.354  1.00 36.26 ? ? ? ? ? ? 56   LYS B CE  1 
ATOM   3204 N  NZ  . LYS B 1 58  ? 4.629   -15.750 19.777  1.00 40.26 ? ? ? ? ? ? 56   LYS B NZ  1 
ATOM   3205 N  N   . GLN B 1 59  ? 3.670   -16.741 12.526  1.00 13.15 ? ? ? ? ? ? 57   GLN B N   1 
ATOM   3206 C  CA  . GLN B 1 59  ? 2.909   -17.824 11.905  1.00 15.15 ? ? ? ? ? ? 57   GLN B CA  1 
ATOM   3207 C  C   . GLN B 1 59  ? 3.732   -18.504 10.820  1.00 18.63 ? ? ? ? ? ? 57   GLN B C   1 
ATOM   3208 O  O   . GLN B 1 59  ? 3.768   -19.739 10.730  1.00 15.84 ? ? ? ? ? ? 57   GLN B O   1 
ATOM   3209 C  CB  . GLN B 1 59  ? 1.593   -17.291 11.328  1.00 18.62 ? ? ? ? ? ? 57   GLN B CB  1 
ATOM   3210 C  CG  . GLN B 1 59  ? 0.614   -18.367 10.803  1.00 25.09 ? ? ? ? ? ? 57   GLN B CG  1 
ATOM   3211 C  CD  . GLN B 1 59  ? 1.075   -19.076 9.523   1.00 37.49 ? ? ? ? ? ? 57   GLN B CD  1 
ATOM   3212 O  OE1 . GLN B 1 59  ? 1.596   -18.449 8.596   1.00 37.58 ? ? ? ? ? ? 57   GLN B OE1 1 
ATOM   3213 N  NE2 . GLN B 1 59  ? 0.900   -20.398 9.483   1.00 32.69 ? ? ? ? ? ? 57   GLN B NE2 1 
ATOM   3214 N  N   . PHE B 1 60  ? 4.402   -17.708 9.987   1.00 11.03 ? ? ? ? ? ? 58   PHE B N   1 
ATOM   3215 C  CA  . PHE B 1 60  ? 5.186   -18.272 8.899   1.00 12.14 ? ? ? ? ? ? 58   PHE B CA  1 
ATOM   3216 C  C   . PHE B 1 60  ? 6.344   -19.111 9.423   1.00 11.36 ? ? ? ? ? ? 58   PHE B C   1 
ATOM   3217 O  O   . PHE B 1 60  ? 6.635   -20.186 8.883   1.00 10.59 ? ? ? ? ? ? 58   PHE B O   1 
ATOM   3218 C  CB  . PHE B 1 60  ? 5.699   -17.151 7.993   1.00 13.15 ? ? ? ? ? ? 58   PHE B CB  1 
ATOM   3219 C  CG  . PHE B 1 60  ? 6.767   -17.594 7.045   1.00 10.82 ? ? ? ? ? ? 58   PHE B CG  1 
ATOM   3220 C  CD1 . PHE B 1 60  ? 8.090   -17.236 7.248   1.00 14.42 ? ? ? ? ? ? 58   PHE B CD1 1 
ATOM   3221 C  CD2 . PHE B 1 60  ? 6.450   -18.389 5.956   1.00 10.34 ? ? ? ? ? ? 58   PHE B CD2 1 
ATOM   3222 C  CE1 . PHE B 1 60  ? 9.079   -17.653 6.367   1.00 10.98 ? ? ? ? ? ? 58   PHE B CE1 1 
ATOM   3223 C  CE2 . PHE B 1 60  ? 7.429   -18.814 5.073   1.00 12.18 ? ? ? ? ? ? 58   PHE B CE2 1 
ATOM   3224 C  CZ  . PHE B 1 60  ? 8.745   -18.447 5.272   1.00 10.06 ? ? ? ? ? ? 58   PHE B CZ  1 
ATOM   3225 N  N   . CYS B 1 61  ? 7.022   -18.636 10.473  1.00 10.48 ? ? ? ? ? ? 59   CYS B N   1 
ATOM   3226 C  CA  . CYS B 1 61  ? 8.197   -19.339 10.976  1.00 11.75 ? ? ? ? ? ? 59   CYS B CA  1 
ATOM   3227 C  C   . CYS B 1 61  ? 7.835   -20.690 11.592  1.00 12.75 ? ? ? ? ? ? 59   CYS B C   1 
ATOM   3228 O  O   . CYS B 1 61  ? 8.685   -21.585 11.637  1.00 15.27 ? ? ? ? ? ? 59   CYS B O   1 
ATOM   3229 C  CB  . CYS B 1 61  ? 8.944   -18.450 11.985  1.00 12.09 ? ? ? ? ? ? 59   CYS B CB  1 
ATOM   3230 S  SG  . CYS B 1 61  ? 9.936   -17.124 11.155  1.00 14.09 ? ? ? ? ? ? 59   CYS B SG  1 
ATOM   3231 N  N   . LYS B 1 62  ? 6.584   -20.858 12.024  1.00 14.05 ? ? ? ? ? ? 60   LYS B N   1 
ATOM   3232 C  CA  . LYS B 1 62  ? 6.085   -22.129 12.544  1.00 18.28 ? ? ? ? ? ? 60   LYS B CA  1 
ATOM   3233 C  C   . LYS B 1 62  ? 5.870   -23.162 11.454  1.00 17.29 ? ? ? ? ? ? 60   LYS B C   1 
ATOM   3234 O  O   . LYS B 1 62  ? 5.672   -24.341 11.777  1.00 16.42 ? ? ? ? ? ? 60   LYS B O   1 
ATOM   3235 C  CB  . LYS B 1 62  ? 4.759   -21.918 13.275  1.00 15.55 ? ? ? ? ? ? 60   LYS B CB  1 
ATOM   3236 C  CG  . LYS B 1 62  ? 4.875   -21.643 14.761  1.00 27.24 ? ? ? ? ? ? 60   LYS B CG  1 
ATOM   3237 C  CD  . LYS B 1 62  ? 3.818   -20.633 15.167  1.00 33.35 ? ? ? ? ? ? 60   LYS B CD  1 
ATOM   3238 C  CE  . LYS B 1 62  ? 3.188   -20.977 16.495  1.00 44.52 ? ? ? ? ? ? 60   LYS B CE  1 
ATOM   3239 N  NZ  . LYS B 1 62  ? 2.256   -19.902 16.945  1.00 51.14 ? ? ? ? ? ? 60   LYS B NZ  1 
ATOM   3240 N  N   . GLU B 1 63  ? 5.864   -22.747 10.182  1.00 13.16 ? ? ? ? ? ? 61   GLU B N   1 
ATOM   3241 C  CA  . GLU B 1 63  ? 5.691   -23.683 9.088   1.00 17.88 ? ? ? ? ? ? 61   GLU B CA  1 
ATOM   3242 C  C   . GLU B 1 63  ? 6.910   -24.592 8.987   1.00 15.06 ? ? ? ? ? ? 61   GLU B C   1 
ATOM   3243 O  O   . GLU B 1 63  ? 8.008   -24.223 9.415   1.00 15.82 ? ? ? ? ? ? 61   GLU B O   1 
ATOM   3244 C  CB  . GLU B 1 63  ? 5.488   -22.936 7.771   1.00 15.97 ? ? ? ? ? ? 61   GLU B CB  1 
ATOM   3245 C  CG  . GLU B 1 63  ? 4.210   -22.107 7.698   1.00 16.94 ? ? ? ? ? ? 61   GLU B CG  1 
ATOM   3246 C  CD  . GLU B 1 63  ? 2.949   -22.951 7.559   1.00 28.98 ? ? ? ? ? ? 61   GLU B CD  1 
ATOM   3247 O  OE1 . GLU B 1 63  ? 3.041   -24.199 7.516   1.00 31.68 ? ? ? ? ? ? 61   GLU B OE1 1 
ATOM   3248 O  OE2 . GLU B 1 63  ? 1.855   -22.355 7.485   1.00 37.50 ? ? ? ? ? ? 61   GLU B OE2 1 
ATOM   3249 N  N   . PRO B 1 64  ? 6.750   -25.783 8.412   1.00 15.45 ? ? ? ? ? ? 62   PRO B N   1 
ATOM   3250 C  CA  . PRO B 1 64  ? 7.909   -26.666 8.240   1.00 13.48 ? ? ? ? ? ? 62   PRO B CA  1 
ATOM   3251 C  C   . PRO B 1 64  ? 8.937   -26.050 7.310   1.00 13.74 ? ? ? ? ? ? 62   PRO B C   1 
ATOM   3252 O  O   . PRO B 1 64  ? 8.598   -25.338 6.362   1.00 13.76 ? ? ? ? ? ? 62   PRO B O   1 
ATOM   3253 C  CB  . PRO B 1 64  ? 7.306   -27.944 7.635   1.00 15.53 ? ? ? ? ? ? 62   PRO B CB  1 
ATOM   3254 C  CG  . PRO B 1 64  ? 5.981   -27.540 7.092   1.00 20.61 ? ? ? ? ? ? 62   PRO B CG  1 
ATOM   3255 C  CD  . PRO B 1 64  ? 5.497   -26.413 7.965   1.00 14.60 ? ? ? ? ? ? 62   PRO B CD  1 
ATOM   3256 N  N   . LEU B 1 65  ? 10.207  -26.364 7.578   1.00 13.22 ? ? ? ? ? ? 63   LEU B N   1 
ATOM   3257 C  CA  . LEU B 1 65  ? 11.299  -25.859 6.752   1.00 12.03 ? ? ? ? ? ? 63   LEU B CA  1 
ATOM   3258 C  C   . LEU B 1 65  ? 11.118  -26.220 5.280   1.00 13.72 ? ? ? ? ? ? 63   LEU B C   1 
ATOM   3259 O  O   . LEU B 1 65  ? 11.488  -25.431 4.397   1.00 13.57 ? ? ? ? ? ? 63   LEU B O   1 
ATOM   3260 C  CB  . LEU B 1 65  ? 12.632  -26.402 7.266   1.00 13.94 ? ? ? ? ? ? 63   LEU B CB  1 
ATOM   3261 C  CG  . LEU B 1 65  ? 13.914  -25.908 6.582   1.00 15.12 ? ? ? ? ? ? 63   LEU B CG  1 
ATOM   3262 C  CD1 . LEU B 1 65  ? 14.041  -24.382 6.684   1.00 16.52 ? ? ? ? ? ? 63   LEU B CD1 1 
ATOM   3263 C  CD2 . LEU B 1 65  ? 15.133  -26.583 7.189   1.00 21.13 ? ? ? ? ? ? 63   LEU B CD2 1 
ATOM   3264 N  N   . THR B 1 66  ? 10.558  -27.398 4.987   1.00 13.28 ? ? ? ? ? ? 64   THR B N   1 
ATOM   3265 C  CA  . THR B 1 66  ? 10.302  -27.738 3.590   1.00 14.79 ? ? ? ? ? ? 64   THR B CA  1 
ATOM   3266 C  C   . THR B 1 66  ? 9.424   -26.684 2.925   1.00 14.04 ? ? ? ? ? ? 64   THR B C   1 
ATOM   3267 O  O   . THR B 1 66  ? 9.649   -26.327 1.768   1.00 16.37 ? ? ? ? ? ? 64   THR B O   1 
ATOM   3268 C  CB  . THR B 1 66  ? 9.648   -29.116 3.473   1.00 14.22 ? ? ? ? ? ? 64   THR B CB  1 
ATOM   3269 O  OG1 . THR B 1 66  ? 8.503   -29.170 4.331   1.00 18.65 ? ? ? ? ? ? 64   THR B OG1 1 
ATOM   3270 C  CG2 . THR B 1 66  ? 10.637  -30.210 3.863   1.00 14.65 ? ? ? ? ? ? 64   THR B CG2 1 
ATOM   3271 N  N   . PHE B 1 67  ? 8.420   -26.170 3.638   1.00 12.57 ? ? ? ? ? ? 65   PHE B N   1 
ATOM   3272 C  CA  . PHE B 1 67  ? 7.599   -25.116 3.054   1.00 11.57 ? ? ? ? ? ? 65   PHE B CA  1 
ATOM   3273 C  C   . PHE B 1 67  ? 8.353   -23.793 3.013   1.00 15.48 ? ? ? ? ? ? 65   PHE B C   1 
ATOM   3274 O  O   . PHE B 1 67  ? 8.327   -23.083 1.998   1.00 14.08 ? ? ? ? ? ? 65   PHE B O   1 
ATOM   3275 C  CB  . PHE B 1 67  ? 6.292   -24.945 3.819   1.00 14.39 ? ? ? ? ? ? 65   PHE B CB  1 
ATOM   3276 C  CG  . PHE B 1 67  ? 5.471   -23.787 3.326   1.00 18.55 ? ? ? ? ? ? 65   PHE B CG  1 
ATOM   3277 C  CD1 . PHE B 1 67  ? 4.723   -23.905 2.164   1.00 21.50 ? ? ? ? ? ? 65   PHE B CD1 1 
ATOM   3278 C  CD2 . PHE B 1 67  ? 5.474   -22.571 3.998   1.00 16.13 ? ? ? ? ? ? 65   PHE B CD2 1 
ATOM   3279 C  CE1 . PHE B 1 67  ? 3.973   -22.835 1.688   1.00 22.93 ? ? ? ? ? ? 65   PHE B CE1 1 
ATOM   3280 C  CE2 . PHE B 1 67  ? 4.731   -21.497 3.525   1.00 15.68 ? ? ? ? ? ? 65   PHE B CE2 1 
ATOM   3281 C  CZ  . PHE B 1 67  ? 3.978   -21.628 2.379   1.00 16.93 ? ? ? ? ? ? 65   PHE B CZ  1 
ATOM   3282 N  N   . LYS B 1 68  ? 9.023   -23.431 4.112   1.00 12.69 ? ? ? ? ? ? 66   LYS B N   1 
ATOM   3283 C  CA  . LYS B 1 68  ? 9.704   -22.138 4.131   1.00 12.72 ? ? ? ? ? ? 66   LYS B CA  1 
ATOM   3284 C  C   . LYS B 1 68  ? 10.785  -22.071 3.057   1.00 15.19 ? ? ? ? ? ? 66   LYS B C   1 
ATOM   3285 O  O   . LYS B 1 68  ? 10.949  -21.040 2.398   1.00 13.66 ? ? ? ? ? ? 66   LYS B O   1 
ATOM   3286 C  CB  . LYS B 1 68  ? 10.283  -21.855 5.520   1.00 10.94 ? ? ? ? ? ? 66   LYS B CB  1 
ATOM   3287 C  CG  . LYS B 1 68  ? 9.248   -21.970 6.652   1.00 11.50 ? ? ? ? ? ? 66   LYS B CG  1 
ATOM   3288 C  CD  . LYS B 1 68  ? 9.816   -21.563 8.021   1.00 11.43 ? ? ? ? ? ? 66   LYS B CD  1 
ATOM   3289 C  CE  . LYS B 1 68  ? 10.694  -22.648 8.622   1.00 12.49 ? ? ? ? ? ? 66   LYS B CE  1 
ATOM   3290 N  NZ  . LYS B 1 68  ? 11.102  -22.279 10.028  1.00 12.56 ? ? ? ? ? ? 66   LYS B NZ  1 
ATOM   3291 N  N   . SER B 1 69  ? 11.500  -23.178 2.839   1.00 14.86 ? ? ? ? ? ? 67   SER B N   1 
ATOM   3292 C  CA  . SER B 1 69  ? 12.542  -23.235 1.823   1.00 13.53 ? ? ? ? ? ? 67   SER B CA  1 
ATOM   3293 C  C   . SER B 1 69  ? 12.003  -23.074 0.408   1.00 12.22 ? ? ? ? ? ? 67   SER B C   1 
ATOM   3294 O  O   . SER B 1 69  ? 12.773  -22.716 -0.490  1.00 13.70 ? ? ? ? ? ? 67   SER B O   1 
ATOM   3295 C  CB  . SER B 1 69  ? 13.295  -24.566 1.913   1.00 15.66 ? ? ? ? ? ? 67   SER B CB  1 
ATOM   3296 O  OG  . SER B 1 69  ? 14.165  -24.555 3.024   1.00 24.26 ? ? ? ? ? ? 67   SER B OG  1 
ATOM   3297 N  N   . SER B 1 70  ? 10.717  -23.339 0.186   1.00 12.18 ? ? ? ? ? ? 68   SER B N   1 
ATOM   3298 C  CA  . SER B 1 70  ? 10.116  -23.162 -1.134  1.00 14.68 ? ? ? ? ? ? 68   SER B CA  1 
ATOM   3299 C  C   . SER B 1 70  ? 9.821   -21.704 -1.460  1.00 13.47 ? ? ? ? ? ? 68   SER B C   1 
ATOM   3300 O  O   . SER B 1 70  ? 9.521   -21.393 -2.618  1.00 13.28 ? ? ? ? ? ? 68   SER B O   1 
ATOM   3301 C  CB  . SER B 1 70  ? 8.817   -23.968 -1.237  1.00 14.56 ? ? ? ? ? ? 68   SER B CB  1 
ATOM   3302 O  OG  . SER B 1 70  ? 7.759   -23.325 -0.534  1.00 16.14 ? ? ? ? ? ? 68   SER B OG  1 
ATOM   3303 N  N   . CYS B 1 71  ? 9.877   -20.810 -0.472  1.00 11.91 ? ? ? ? ? ? 69   CYS B N   1 
ATOM   3304 C  CA  . CYS B 1 71  ? 9.589   -19.394 -0.700  1.00 11.29 ? ? ? ? ? ? 69   CYS B CA  1 
ATOM   3305 C  C   . CYS B 1 71  ? 10.862  -18.689 -1.166  1.00 12.15 ? ? ? ? ? ? 69   CYS B C   1 
ATOM   3306 O  O   . CYS B 1 71  ? 11.464  -17.871 -0.471  1.00 15.00 ? ? ? ? ? ? 69   CYS B O   1 
ATOM   3307 C  CB  . CYS B 1 71  ? 9.007   -18.761 0.556   1.00 10.33 ? ? ? ? ? ? 69   CYS B CB  1 
ATOM   3308 S  SG  . CYS B 1 71  ? 7.430   -19.498 1.096   1.00 15.91 ? ? ? ? ? ? 69   CYS B SG  1 
ATOM   3309 N  N   . VAL B 1 72  ? 11.267  -19.032 -2.392  1.00 10.80 ? ? ? ? ? ? 70   VAL B N   1 
ATOM   3310 C  CA  . VAL B 1 72  ? 12.446  -18.462 -3.027  1.00 9.58  ? ? ? ? ? ? 70   VAL B CA  1 
ATOM   3311 C  C   . VAL B 1 72  ? 12.120  -18.204 -4.492  1.00 12.03 ? ? ? ? ? ? 70   VAL B C   1 
ATOM   3312 O  O   . VAL B 1 72  ? 11.170  -18.760 -5.046  1.00 13.20 ? ? ? ? ? ? 70   VAL B O   1 
ATOM   3313 C  CB  . VAL B 1 72  ? 13.696  -19.373 -2.908  1.00 15.42 ? ? ? ? ? ? 70   VAL B CB  1 
ATOM   3314 C  CG1 . VAL B 1 72  ? 14.072  -19.574 -1.441  1.00 16.25 ? ? ? ? ? ? 70   VAL B CG1 1 
ATOM   3315 C  CG2 . VAL B 1 72  ? 13.460  -20.717 -3.609  1.00 15.24 ? ? ? ? ? ? 70   VAL B CG2 1 
ATOM   3316 N  N   . SER B 1 73  ? 12.935  -17.360 -5.123  1.00 11.17 ? ? ? ? ? ? 71   SER B N   1 
ATOM   3317 C  CA  . SER B 1 73  ? 12.715  -16.919 -6.497  1.00 12.47 ? ? ? ? ? ? 71   SER B CA  1 
ATOM   3318 C  C   . SER B 1 73  ? 14.052  -16.843 -7.216  1.00 14.23 ? ? ? ? ? ? 71   SER B C   1 
ATOM   3319 O  O   . SER B 1 73  ? 15.068  -16.493 -6.604  1.00 12.32 ? ? ? ? ? ? 71   SER B O   1 
ATOM   3320 C  CB  . SER B 1 73  ? 12.028  -15.536 -6.526  1.00 10.62 ? ? ? ? ? ? 71   SER B CB  1 
ATOM   3321 O  OG  . SER B 1 73  ? 12.266  -14.868 -7.752  1.00 11.99 ? ? ? ? ? ? 71   SER B OG  1 
ATOM   3322 N  N   . ASP B 1 74  ? 14.068  -17.169 -8.510  1.00 8.54  ? ? ? ? ? ? 72   ASP B N   1 
ATOM   3323 C  CA  . ASP B 1 74  ? 15.306  -17.012 -9.257  1.00 13.10 ? ? ? ? ? ? 72   ASP B CA  1 
ATOM   3324 C  C   . ASP B 1 74  ? 15.383  -15.675 -9.996  1.00 12.92 ? ? ? ? ? ? 72   ASP B C   1 
ATOM   3325 O  O   . ASP B 1 74  ? 16.342  -15.447 -10.747 1.00 13.35 ? ? ? ? ? ? 72   ASP B O   1 
ATOM   3326 C  CB  . ASP B 1 74  ? 15.528  -18.203 -10.212 1.00 17.82 ? ? ? ? ? ? 72   ASP B CB  1 
ATOM   3327 C  CG  . ASP B 1 74  ? 14.524  -18.280 -11.356 1.00 21.00 ? ? ? ? ? ? 72   ASP B CG  1 
ATOM   3328 O  OD1 . ASP B 1 74  ? 13.713  -17.358 -11.577 1.00 18.11 ? ? ? ? ? ? 72   ASP B OD1 1 
ATOM   3329 O  OD2 . ASP B 1 74  ? 14.566  -19.308 -12.073 1.00 26.19 ? ? ? ? ? ? 72   ASP B OD2 1 
ATOM   3330 N  N   . LEU B 1 75  ? 14.417  -14.785 -9.776  1.00 9.74  ? ? ? ? ? ? 73   LEU B N   1 
ATOM   3331 C  CA  . LEU B 1 75  ? 14.454  -13.426 -10.310 1.00 8.68  ? ? ? ? ? ? 73   LEU B CA  1 
ATOM   3332 C  C   . LEU B 1 75  ? 14.830  -12.385 -9.268  1.00 12.68 ? ? ? ? ? ? 73   LEU B C   1 
ATOM   3333 O  O   . LEU B 1 75  ? 15.576  -11.456 -9.572  1.00 12.75 ? ? ? ? ? ? 73   LEU B O   1 
ATOM   3334 C  CB  . LEU B 1 75  ? 13.096  -13.056 -10.905 1.00 10.55 ? ? ? ? ? ? 73   LEU B CB  1 
ATOM   3335 C  CG  . LEU B 1 75  ? 12.570  -13.970 -12.012 1.00 12.99 ? ? ? ? ? ? 73   LEU B CG  1 
ATOM   3336 C  CD1 . LEU B 1 75  ? 11.123  -13.628 -12.309 1.00 12.80 ? ? ? ? ? ? 73   LEU B CD1 1 
ATOM   3337 C  CD2 . LEU B 1 75  ? 13.434  -13.791 -13.252 1.00 13.29 ? ? ? ? ? ? 73   LEU B CD2 1 
ATOM   3338 N  N   . THR B 1 76  ? 14.335  -12.526 -8.045  1.00 12.06 ? ? ? ? ? ? 74   THR B N   1 
ATOM   3339 C  CA  . THR B 1 76  ? 14.583  -11.564 -6.983  1.00 9.64  ? ? ? ? ? ? 74   THR B CA  1 
ATOM   3340 C  C   . THR B 1 76  ? 15.171  -12.295 -5.784  1.00 12.39 ? ? ? ? ? ? 74   THR B C   1 
ATOM   3341 O  O   . THR B 1 76  ? 14.985  -13.504 -5.616  1.00 10.21 ? ? ? ? ? ? 74   THR B O   1 
ATOM   3342 C  CB  . THR B 1 76  ? 13.291  -10.835 -6.572  1.00 11.55 ? ? ? ? ? ? 74   THR B CB  1 
ATOM   3343 O  OG1 . THR B 1 76  ? 13.549  -9.990  -5.440  1.00 11.64 ? ? ? ? ? ? 74   THR B OG1 1 
ATOM   3344 C  CG2 . THR B 1 76  ? 12.199  -11.842 -6.195  1.00 12.61 ? ? ? ? ? ? 74   THR B CG2 1 
ATOM   3345 N  N   . TYR B 1 77  ? 15.891  -11.549 -4.950  1.00 9.51  ? ? ? ? ? ? 75   TYR B N   1 
ATOM   3346 C  CA  . TYR B 1 77  ? 16.408  -12.104 -3.707  1.00 9.77  ? ? ? ? ? ? 75   TYR B CA  1 
ATOM   3347 C  C   . TYR B 1 77  ? 15.354  -12.170 -2.612  1.00 11.96 ? ? ? ? ? ? 75   TYR B C   1 
ATOM   3348 O  O   . TYR B 1 77  ? 15.647  -12.675 -1.519  1.00 11.54 ? ? ? ? ? ? 75   TYR B O   1 
ATOM   3349 C  CB  . TYR B 1 77  ? 17.623  -11.297 -3.235  1.00 11.63 ? ? ? ? ? ? 75   TYR B CB  1 
ATOM   3350 C  CG  . TYR B 1 77  ? 18.847  -11.652 -4.038  1.00 11.86 ? ? ? ? ? ? 75   TYR B CG  1 
ATOM   3351 C  CD1 . TYR B 1 77  ? 19.616  -12.756 -3.698  1.00 14.17 ? ? ? ? ? ? 75   TYR B CD1 1 
ATOM   3352 C  CD2 . TYR B 1 77  ? 19.204  -10.920 -5.172  1.00 10.71 ? ? ? ? ? ? 75   TYR B CD2 1 
ATOM   3353 C  CE1 . TYR B 1 77  ? 20.719  -13.114 -4.443  1.00 13.61 ? ? ? ? ? ? 75   TYR B CE1 1 
ATOM   3354 C  CE2 . TYR B 1 77  ? 20.317  -11.268 -5.921  1.00 12.49 ? ? ? ? ? ? 75   TYR B CE2 1 
ATOM   3355 C  CZ  . TYR B 1 77  ? 21.069  -12.366 -5.547  1.00 15.29 ? ? ? ? ? ? 75   TYR B CZ  1 
ATOM   3356 O  OH  . TYR B 1 77  ? 22.166  -12.745 -6.273  1.00 13.34 ? ? ? ? ? ? 75   TYR B OH  1 
ATOM   3357 N  N   . SER B 1 78  ? 14.133  -11.712 -2.884  1.00 9.46  ? ? ? ? ? ? 76   SER B N   1 
ATOM   3358 C  CA  . SER B 1 78  ? 13.078  -11.779 -1.881  1.00 11.56 ? ? ? ? ? ? 76   SER B CA  1 
ATOM   3359 C  C   . SER B 1 78  ? 12.795  -13.222 -1.485  1.00 11.60 ? ? ? ? ? ? 76   SER B C   1 
ATOM   3360 O  O   . SER B 1 78  ? 12.907  -14.151 -2.291  1.00 13.53 ? ? ? ? ? ? 76   SER B O   1 
ATOM   3361 C  CB  . SER B 1 78  ? 11.785  -11.148 -2.395  1.00 9.22  ? ? ? ? ? ? 76   SER B CB  1 
ATOM   3362 O  OG  . SER B 1 78  ? 11.943  -9.764  -2.647  1.00 9.98  ? ? ? ? ? ? 76   SER B OG  1 
ATOM   3363 N  N   . GLY B 1 79  ? 12.395  -13.398 -0.235  1.00 8.74  ? ? ? ? ? ? 77   GLY B N   1 
ATOM   3364 C  CA  . GLY B 1 79  ? 12.050  -14.715 0.239   1.00 8.41  ? ? ? ? ? ? 77   GLY B CA  1 
ATOM   3365 C  C   . GLY B 1 79  ? 12.931  -15.206 1.369   1.00 10.52 ? ? ? ? ? ? 77   GLY B C   1 
ATOM   3366 O  O   . GLY B 1 79  ? 13.651  -14.430 2.013   1.00 8.58  ? ? ? ? ? ? 77   GLY B O   1 
ATOM   3367 N  N   . TYR B 1 80  ? 12.925  -16.520 1.561   1.00 10.02 ? ? ? ? ? ? 78   TYR B N   1 
ATOM   3368 C  CA  . TYR B 1 80  ? 13.396  -17.132 2.792   1.00 9.36  ? ? ? ? ? ? 78   TYR B CA  1 
ATOM   3369 C  C   . TYR B 1 80  ? 14.888  -17.437 2.747   1.00 13.34 ? ? ? ? ? ? 78   TYR B C   1 
ATOM   3370 O  O   . TYR B 1 80  ? 15.419  -17.881 1.726   1.00 14.29 ? ? ? ? ? ? 78   TYR B O   1 
ATOM   3371 C  CB  . TYR B 1 80  ? 12.601  -18.413 3.058   1.00 9.88  ? ? ? ? ? ? 78   TYR B CB  1 
ATOM   3372 C  CG  . TYR B 1 80  ? 12.963  -19.093 4.361   1.00 9.94  ? ? ? ? ? ? 78   TYR B CG  1 
ATOM   3373 C  CD1 . TYR B 1 80  ? 12.598  -18.530 5.577   1.00 12.34 ? ? ? ? ? ? 78   TYR B CD1 1 
ATOM   3374 C  CD2 . TYR B 1 80  ? 13.691  -20.285 4.370   1.00 11.75 ? ? ? ? ? ? 78   TYR B CD2 1 
ATOM   3375 C  CE1 . TYR B 1 80  ? 12.930  -19.146 6.783   1.00 12.14 ? ? ? ? ? ? 78   TYR B CE1 1 
ATOM   3376 C  CE2 . TYR B 1 80  ? 14.032  -20.907 5.575   1.00 13.15 ? ? ? ? ? ? 78   TYR B CE2 1 
ATOM   3377 C  CZ  . TYR B 1 80  ? 13.641  -20.334 6.767   1.00 12.05 ? ? ? ? ? ? 78   TYR B CZ  1 
ATOM   3378 O  OH  . TYR B 1 80  ? 13.972  -20.934 7.956   1.00 13.10 ? ? ? ? ? ? 78   TYR B OH  1 
ATOM   3379 N  N   . VAL B 1 81  ? 15.559  -17.188 3.871   1.00 12.40 ? ? ? ? ? ? 79   VAL B N   1 
ATOM   3380 C  CA  . VAL B 1 81  ? 16.945  -17.597 4.093   1.00 13.07 ? ? ? ? ? ? 79   VAL B CA  1 
ATOM   3381 C  C   . VAL B 1 81  ? 16.985  -18.379 5.399   1.00 12.31 ? ? ? ? ? ? 79   VAL B C   1 
ATOM   3382 O  O   . VAL B 1 81  ? 16.616  -17.848 6.454   1.00 11.55 ? ? ? ? ? ? 79   VAL B O   1 
ATOM   3383 C  CB  . VAL B 1 81  ? 17.907  -16.396 4.160   1.00 17.02 ? ? ? ? ? ? 79   VAL B CB  1 
ATOM   3384 C  CG1 . VAL B 1 81  ? 19.336  -16.870 4.395   1.00 21.43 ? ? ? ? ? ? 79   VAL B CG1 1 
ATOM   3385 C  CG2 . VAL B 1 81  ? 17.837  -15.574 2.880   1.00 20.44 ? ? ? ? ? ? 79   VAL B CG2 1 
ATOM   3386 N  N   . ALA B 1 82  ? 17.450  -19.620 5.340   1.00 10.89 ? ? ? ? ? ? 80   ALA B N   1 
ATOM   3387 C  CA  . ALA B 1 82  ? 17.484  -20.418 6.557   1.00 12.83 ? ? ? ? ? ? 80   ALA B CA  1 
ATOM   3388 C  C   . ALA B 1 82  ? 18.564  -19.914 7.515   1.00 14.41 ? ? ? ? ? ? 80   ALA B C   1 
ATOM   3389 O  O   . ALA B 1 82  ? 19.521  -19.245 7.126   1.00 14.80 ? ? ? ? ? ? 80   ALA B O   1 
ATOM   3390 C  CB  . ALA B 1 82  ? 17.741  -21.892 6.232   1.00 14.72 ? ? ? ? ? ? 80   ALA B CB  1 
ATOM   3391 N  N   A SER B 1 83  ? 18.395  -20.258 8.788   0.47 15.67 ? ? ? ? ? ? 81   SER B N   1 
ATOM   3392 N  N   B SER B 1 83  ? 18.393  -20.252 8.788   0.53 15.67 ? ? ? ? ? ? 81   SER B N   1 
ATOM   3393 C  CA  A SER B 1 83  ? 19.412  -19.980 9.793   0.47 17.05 ? ? ? ? ? ? 81   SER B CA  1 
ATOM   3394 C  CA  B SER B 1 83  ? 19.417  -19.969 9.781   0.53 17.06 ? ? ? ? ? ? 81   SER B CA  1 
ATOM   3395 C  C   A SER B 1 83  ? 20.714  -20.700 9.447   0.47 17.56 ? ? ? ? ? ? 81   SER B C   1 
ATOM   3396 C  C   B SER B 1 83  ? 20.716  -20.688 9.427   0.53 17.55 ? ? ? ? ? ? 81   SER B C   1 
ATOM   3397 O  O   A SER B 1 83  ? 20.715  -21.807 8.899   0.47 14.33 ? ? ? ? ? ? 81   SER B O   1 
ATOM   3398 O  O   B SER B 1 83  ? 20.715  -21.785 8.859   0.53 14.29 ? ? ? ? ? ? 81   SER B O   1 
ATOM   3399 C  CB  A SER B 1 83  ? 18.906  -20.414 11.170  0.47 16.38 ? ? ? ? ? ? 81   SER B CB  1 
ATOM   3400 C  CB  B SER B 1 83  ? 18.936  -20.400 11.164  0.53 16.39 ? ? ? ? ? ? 81   SER B CB  1 
ATOM   3401 O  OG  A SER B 1 83  ? 19.924  -20.338 12.153  0.47 19.40 ? ? ? ? ? ? 81   SER B OG  1 
ATOM   3402 O  OG  B SER B 1 83  ? 18.738  -21.801 11.216  0.53 19.89 ? ? ? ? ? ? 81   SER B OG  1 
ATOM   3403 N  N   . GLY B 1 84  ? 21.836  -20.054 9.763   1.00 15.22 ? ? ? ? ? ? 82   GLY B N   1 
ATOM   3404 C  CA  . GLY B 1 84  ? 23.143  -20.621 9.501   1.00 16.89 ? ? ? ? ? ? 82   GLY B CA  1 
ATOM   3405 C  C   . GLY B 1 84  ? 23.692  -20.390 8.107   1.00 21.55 ? ? ? ? ? ? 82   GLY B C   1 
ATOM   3406 O  O   . GLY B 1 84  ? 24.813  -20.825 7.823   1.00 22.20 ? ? ? ? ? ? 82   GLY B O   1 
ATOM   3407 N  N   . GLU B 1 85  ? 22.946  -19.726 7.227   1.00 20.55 ? ? ? ? ? ? 83   GLU B N   1 
ATOM   3408 C  CA  . GLU B 1 85  ? 23.419  -19.462 5.873   1.00 24.91 ? ? ? ? ? ? 83   GLU B CA  1 
ATOM   3409 C  C   . GLU B 1 85  ? 24.249  -18.186 5.806   1.00 26.11 ? ? ? ? ? ? 83   GLU B C   1 
ATOM   3410 O  O   . GLU B 1 85  ? 25.303  -18.154 5.163   1.00 25.16 ? ? ? ? ? ? 83   GLU B O   1 
ATOM   3411 C  CB  . GLU B 1 85  ? 22.233  -19.361 4.916   1.00 25.30 ? ? ? ? ? ? 83   GLU B CB  1 
ATOM   3412 C  CG  . GLU B 1 85  ? 21.375  -20.599 4.882   1.00 31.92 ? ? ? ? ? ? 83   GLU B CG  1 
ATOM   3413 C  CD  . GLU B 1 85  ? 21.911  -21.628 3.919   1.00 45.59 ? ? ? ? ? ? 83   GLU B CD  1 
ATOM   3414 O  OE1 . GLU B 1 85  ? 22.384  -21.222 2.834   1.00 49.57 ? ? ? ? ? ? 83   GLU B OE1 1 
ATOM   3415 O  OE2 . GLU B 1 85  ? 21.860  -22.833 4.245   1.00 47.04 ? ? ? ? ? ? 83   GLU B OE2 1 
ATOM   3416 N  N   . GLU B 1 86  ? 23.783  -17.127 6.458   1.00 26.11 ? ? ? ? ? ? 84   GLU B N   1 
ATOM   3417 C  CA  . GLU B 1 86  ? 24.538  -15.883 6.493   1.00 24.25 ? ? ? ? ? ? 84   GLU B CA  1 
ATOM   3418 C  C   . GLU B 1 86  ? 25.728  -16.009 7.432   1.00 25.17 ? ? ? ? ? ? 84   GLU B C   1 
ATOM   3419 O  O   . GLU B 1 86  ? 25.647  -16.649 8.484   1.00 21.83 ? ? ? ? ? ? 84   GLU B O   1
[truncated: 392,094 more chars]
